# Supplementary material for: Systematic review of seroprevalence of SARS-CoV-2 antibodies and appraisal of evidence, prior to the widespread introduction of vaccine programmes in the WHO European Region, January–December 2020
Source: PubMed Central journal article supplement — BMJ Open. 2023 Nov 6;13(11):e064240. doi: 10.1136/bmjopen-2022-064240 (PMC10632881; doi:10.1136/bmjopen-2022-064240), 2023-11-06
Supplement: bmjopen-2022-064240.draft_revisions.pdf [file bmjopen-2022-064240.draft_revisions.pdf]

# BMJ Open

BMJ Open is committed to open peer review. As part of this commitment we make the peer review history of every article we publish publicly available.

When an article is published we post the peer reviewers' comments and the authors' responses online. We also post the versions of the paper that were used during peer review. These are the versions that the peer review comments apply to.

The versions of the paper that follow are the versions that were submitted during the peer review process. They are not the versions of record or the final published versions. They should not be cited or distributed as the published version of this manuscript.

BMJ Open is an open access journal and the full, final, typeset and author-corrected version of record of the manuscript is available on our site with no access controls, subscription charges or pay-per-view fees (<http://bmjopen.bmj.com>).

If you have any questions on BMJ Open's open peer review process please email [info.bmjopen@bmj.com](mailto:info.bmjopen@bmj.com)

# BMJ Open

## A systematic review of seroprevalence of SARS-CoV-2 antibodies prior to the widespread introduction of vaccine programmes in the WHO European Region, January - December 2020

|                               |                                                                                                                                                                                                                                                                                                                                                                                                                                                                                                                                                                                                                                                                                                                                                            |
|-------------------------------|------------------------------------------------------------------------------------------------------------------------------------------------------------------------------------------------------------------------------------------------------------------------------------------------------------------------------------------------------------------------------------------------------------------------------------------------------------------------------------------------------------------------------------------------------------------------------------------------------------------------------------------------------------------------------------------------------------------------------------------------------------|
| Journal:                      | <i>BMJ Open</i>                                                                                                                                                                                                                                                                                                                                                                                                                                                                                                                                                                                                                                                                                                                                            |
| Manuscript ID                 | bmjopen-2022-064240                                                                                                                                                                                                                                                                                                                                                                                                                                                                                                                                                                                                                                                                                                                                        |
| Article Type:                 | Original research                                                                                                                                                                                                                                                                                                                                                                                                                                                                                                                                                                                                                                                                                                                                          |
| Date Submitted by the Author: | 31-Oct-2022                                                                                                                                                                                                                                                                                                                                                                                                                                                                                                                                                                                                                                                                                                                                                |
| Complete List of Authors:     | Vaughan, Aisling; World Health Organization Regional Office for Europe<br>Duffell, Erika; European Centre for Disease Prevention and Control<br>Freidl, Gudrun; World Health Organization Regional Office for Europe<br>Lemos, Diogo; World Health Organization Regional Office for Europe<br>Nardone, Anthony; Epiconcept SAS<br>Valenciano, M; Epiconcept SAS<br>Subissi, Lorenzo; World Health Organization<br>Bergeri, Isabel; World Health Organization<br>Broberg, Eeva ; European Centre for Disease Prevention and Control<br>Penttinen, Pasi; European Centre for Disease Prevention and Control<br>Pebody, Richard; World Health Organization Regional Office for Europe<br>Keramarou, Maria; European Centre for Disease Prevention and Control |
| Keywords:                     | Epidemiology < INFECTIOUS DISEASES, Public health < INFECTIOUS DISEASES, INFECTIOUS DISEASES                                                                                                                                                                                                                                                                                                                                                                                                                                                                                                                                                                                                                                                               |
|                               |                                                                                                                                                                                                                                                                                                                                                                                                                                                                                                                                                                                                                                                                                                                                                            |

SCHOLARONE™  
Manuscripts

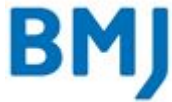

I, the Submitting Author has the right to grant and does grant on behalf of all authors of the Work (as defined in the below author licence), an exclusive licence and/or a non-exclusive licence for contributions from authors who are: i) UK Crown employees; ii) where BMJ has agreed a CC-BY licence shall apply, and/or iii) in accordance with the terms applicable for US Federal Government officers or employees acting as part of their official duties; on a worldwide, perpetual, irrevocable, royalty-free basis to BMJ Publishing Group Ltd ("BMJ") its licensees and where the relevant Journal is co-owned by BMJ to the co-owners of the Journal, to publish the Work in this journal and any other BMJ products and to exploit all rights, as set out in our [licence](#).

The Submitting Author accepts and understands that any supply made under these terms is made by BMJ to the Submitting Author unless you are acting as an employee on behalf of your employer or a postgraduate student of an affiliated institution which is paying any applicable article publishing charge ("APC") for Open Access articles. Where the Submitting Author wishes to make the Work available on an Open Access basis (and intends to pay the relevant APC), the terms of reuse of such Open Access shall be governed by a Creative Commons licence – details of these licences and which [Creative Commons](#) licence will apply to this Work are set out in our licence referred to above.

Other than as permitted in any relevant BMJ Author's Self Archiving Policies, I confirm this Work has not been accepted for publication elsewhere, is not being considered for publication elsewhere and does not duplicate material already published. I confirm all authors consent to publication of this Work and authorise the granting of this licence.

# A systematic review of seroprevalence of SARS-CoV-2 antibodies prior to the widespread introduction of vaccine programmes in the WHO European Region, January - December 2020

Vaughan A <sup>1</sup>, Duffell EF <sup>2</sup>, Freidl GS <sup>1</sup>, Lemos DS <sup>1</sup>, Nardone A <sup>3</sup>, Valenciano M <sup>3</sup>, Subissi L<sup>4</sup>, Bergeri I <sup>4</sup>, Broberg E <sup>2</sup>, Penttinen P <sup>2</sup>, Pebody R <sup>1</sup>, and Keramarou M <sup>2</sup>

1. World Health Organization Regional Office for Europe, Copenhagen, Denmark; 2. European Centre for Disease Prevention and Control, Stockholm, Sweden; 3. Epiconcept, Paris, France; 4. World Health Organization, Geneva, Switzerland

Corresponding author: Dr. Aisling Vaughan, World Health Organization Regional Office for Europe, Copenhagen, Denmark; vaughana@who.int

## ABSTRACT

### Objectives

To undertake a systematic literature review of SARS-CoV-2 population seroprevalence studies undertaken in the WHO European Region to measure pre-existing and cumulative seropositivity prior to the roll out of vaccination programmes.

### Method

We systematically searched MEDLINE, ELSEVIER and the pre-print servers medRxiv and bioRxiv within the “COVID-19 Global literature on coronavirus disease” database using a predefined search strategy. Studies published before the widespread implementation of COVID-19 vaccination programmes in January 2021 among the general population and blood donors, at national and regional levels. Study risk of bias was assessed using a quality scoring system based on sample size, sampling and testing methodologies. Articles were supplemented with unpublished WHO-supported Unity-aligned seroprevalence studies and other studies reported directly to WHO Regional Office for Europe and ECDC.

### Results

In total, 111 studies from 26 countries published or conducted between 01/01/2020 and 31/12/2020 across the WHO European Region were included. A significant heterogeneity in implementation was noted across the studies, with a paucity of studies from the east of the Region. Sixty-four (58%) studies were assessed

1  
2  
3 to be of medium to high risk of bias. Overall, SARS-CoV-2 seropositivity prior to widespread community  
4 circulation was very low. National seroprevalence estimates after circulation started ranged from 0% to  
5 51.3% (median 2.2% (IQR 0.7-5.2%); n=124), while sub-national estimates ranged from 0% to 52%  
6 (median 5.8% (IQR 2.3-12%); n=101), with the highest estimates in areas following widespread local  
7 transmission.  
8  
9  
10  
11  
12

### 13 **Conclusion**

14  
15 The review found evidence of low national SARS-CoV-2 seroprevalence (<10%) across the WHO  
16 European Region by the end of 2020. The low levels of SARS-CoV-2 antibody in most populations prior  
17 to the start of vaccine programmes underlines the critical importance of targeted vaccination of priority  
18 groups at risk of severe disease, while maintaining reduced levels of transmission to minimize population  
19 morbidity and mortality.  
20  
21  
22  
23  
24  
25  
26  
27

### 28 **INTRODUCTION**

29  
30 The novel virus, Severe Acute Respiratory Syndrome–Coronavirus–2 (SARS-CoV-2) was first identified  
31 in Wuhan, China in December 2019 and spread rapidly around the world. At that time, the transmissibility,  
32 population susceptibility, clinical spectrum and infection-severity were all unknown. As of 7 March 2022,  
33 approximately 444 million confirmed cases and 6 million deaths have been reported globally, while in the  
34 WHO European Region, there have been 182 million cases and 1.9 million deaths (1, 2). However, notified  
35 cases and deaths are an underestimate of the true number of infections for reasons including clinical  
36 presentation with a large proportion of asymptomatic or mildly symptomatic cases, testing and reporting  
37 strategies and health care seeking behaviour (3). Asymptomatic infection has been reported in many studies  
38 with the proportion ranging from 6 to 41% (4-6), so a significant proportion of SARS-CoV-2 infections  
39 will be missed through case-based surveillance systems (7).  
40  
41  
42  
43  
44  
45  
46  
47  
48  
49  
50  
51  
52

53 As the majority of infected individuals have a detectable humoral immune response on average 10-14 days  
54 after symptom onset and most individuals seroconvert within 3-4 weeks of infection (8), seroprevalence  
55  
56  
57  
58  
59  
60

1  
2  
3 studies which measure SARS-CoV-2 antibodies can provide an important complement to routine  
4 surveillance, particularly as part of the assessment of novel emerging respiratory pathogens. Seroprevalence  
5 surveys are essential to assess the age-specific prevalence of pre-existing cross-reactive antibodies in the  
6 population; to measure population age-specific cumulative seroincidence as the novel virus spreads and to  
7 contribute to estimating infection-severity.  
8  
9  
10  
11  
12

13  
14  
15 Since the start of the COVID-19 pandemic, there has been a rapid accumulation of seroepidemiological  
16 studies describing the seroprevalence of SARS-CoV-2. This review aims to provide a comprehensive  
17 review of studies conducted in the WHO European Region between 1 January and 31 December 2020 in  
18 the general population, with the aim to synthesize evidence on the extent of transmission across the region  
19 and population immunity to this newly emerging infection before the start of the COVID-19 vaccination  
20 programmes. As SARS-CoV-2 continues to circulate widely, understanding the age-specific population  
21 seropositivity remains critical for policymakers and public health officials to make informed decisions on  
22 optimal public health interventions (9).  
23  
24  
25  
26  
27  
28  
29  
30  
31

## 32 33 **METHODS**

### 34 **Search strategy**

35 We searched MEDLINE, WHO COVID, ELSEVIER and the pre-print servers medRxiv and bioRxiv within  
36 the WHO “COVID-19 Global literature on coronavirus disease” database on 21/10/2020 and 12/01/2021.  
37 The searches spanned the period 1 January - 31 December 2020 and was not restricted by language. We  
38 supplemented these articles with WHO-supported Unity seroprevalence studies and unpublished studies  
39 reported to WHO Regional Office for Europe and ECDC. The selection process followed the Preferred  
40 Reporting Items for Systematic Reviews and Meta-analyses (PRISMA) guidelines (10). The full search  
41 strategy, search terms as well as inclusion and exclusion criteria are described in Supplementary Material  
42 S1.  
43  
44  
45  
46  
47  
48  
49  
50  
51  
52  
53  
54  
55  
56  
57  
58  
59  
60

### Data extraction

We combined the references from all databases, removed duplicates and imported the remaining articles into Rayyan software (11) for screening of titles and abstracts according to the inclusion and exclusion criteria (Supplementary Table S1). After the initial screening of title and abstracts, two independent researchers assessed full-text publications for eligibility. Data from pre-print articles were extracted and later replaced with data from published articles, where necessary. At least two independent researchers extracted the eligible studies; a third researcher resolved any disagreements on assessment of eligibility or extraction. We extracted the following data: first author, publication date, country, region, period of study, population type, population age, sampling method, sample size, laboratory methods used, confirmatory testing, test performance, crude and adjusted point seroprevalence estimates, antibody type and analysis methodology. Comparison was made with weekly laboratory confirmed case and death reports.

### Study quality assessment

We developed a quality assessment scoring system to assess the overall risk of bias of each study. The criteria included: a) the sampling frame (to assess representativeness of the general population); b) stratification (age, sex or population); c) recruitment method (random, convenience), d): adequacy of sample size, e): serological methods and validation; f) and statistical analyses (adjustment of results to account for the sensitivity and specificity of the test). A cumulative quality score classified the overall risk of bias of each study into high risk of bias (1-3), medium risk of bias (4-6) or low risk of bias (>6). See Supplementary Table S2 for more details on the quality criteria. For the purposes of quality assessment, the threshold for acceptable test performance was  $\geq 95\%$  sensitivity and  $>97\%$  specificity for laboratory assays and  $\geq 90\%$  sensitivity and  $>97\%$  specificity for point-of-care tests (12).

### Data analysis

We used descriptive statistics to summarize results. We generated forest plots to display the data and explore variations according to specific characteristics, including time and population group. Correlation between cumulative incidence and cumulative deaths and seroprevalence estimates from studies of the

1  
2  
3 general population was explored using Spearman's rank correlation. We compared seroprevalence  
4 estimates from studies of the general population and the cumulative incidence and deaths at the start of each  
5 study. Analyses were performed in Microsoft Excel (version 2016) and R version 4.0.4.  
6  
7  
8

### 9 10 **Patient and public involvement**

11 No patient involved  
12  
13  
14  
15

## 16 **RESULTS**

17 The literature search resulted in 4,063 studies. After deduplication, application of inclusion and exclusion  
18 criteria and supplementation with articles from other sources, a total of 111 studies were included in this  
19 review. Of these, 77 were published articles, 19 were preprints, nine were institutional reports, and six were  
20 studies were identified through reporting of unpublished results to WHO or ECDC. See Figure 1 PRISMA  
21 flow diagram study selection.  
22  
23  
24  
25  
26  
27  
28  
29

30 The 111 studies included 224 seroprevalence estimates from 26 of the 53 countries in the WHO European  
31 Region (Figure 2). The majority of studies (n=82; 74%) were conducted in 19 EU/EEA countries, while 29  
32 studies (26%) conducted in seven non-EU/EEA countries (Bosnia and Herzegovina, Georgia, Kyrgyzstan,  
33 Republic of Moldova, Russian Federation, Switzerland and the United Kingdom) (Figure 2; Table 1). Fifty-  
34 six (50%) studies were aligned with the World Health Organization Unity population-based sero-  
35 epidemiological investigation criteria related to study design, data collection and analysis (2). The majority  
36 of studies (n=69, 62%) used non-random or convenience sampling of the population. Forty-one (37%)  
37 studies used random sampling, while one study did not report sampling methodology. Characteristics and  
38 details of included studies are shown in Table 1 and Table 2, respectively.  
39  
40  
41  
42  
43  
44  
45  
46  
47  
48  
49  
50  
51  
52  
53  
54  
55  
56  
57  
58  
59  
60



Table 2 Characteristics of eligible seroprevalence studies

|    | Author                         | Country                                             | Study Location         | EU/non-EU                                     | WHO UNITY aligned | Geographic location | Publication type | Study period           | Study population              | Sample method      | Sampling frame | No of participants | Seropositivity (%)                       | Serological method                                             | Assay                         | Antibody measured/Antigen                                                                         | Sensitivity (%)                                    | Specificity (%)                         | Quality score                           | Overall risk of bias |        |
|----|--------------------------------|-----------------------------------------------------|------------------------|-----------------------------------------------|-------------------|---------------------|------------------|------------------------|-------------------------------|--------------------|----------------|--------------------|------------------------------------------|----------------------------------------------------------------|-------------------------------|---------------------------------------------------------------------------------------------------|----------------------------------------------------|-----------------------------------------|-----------------------------------------|----------------------|--------|
| 1  | <b>Household and community</b> |                                                     |                        |                                               |                   |                     |                  |                        |                               |                    |                |                    |                                          |                                                                |                               |                                                                                                   |                                                    |                                         |                                         |                      |        |
| 2  |                                |                                                     |                        |                                               |                   |                     |                  |                        |                               |                    |                |                    |                                          |                                                                |                               |                                                                                                   |                                                    |                                         |                                         |                      |        |
| 3  | 1                              | Knabl (50)                                          | Austria                | Tyrol, Ischgl                                 | EU/EEA            | Yes                 | City/local       | Published <sup>^</sup> | 21-27 Apr                     | General population | Random         | HH/C samples       | 1473                                     | 42.4% (39.8 - 44.7%)                                           | ELISA; CLIA                   | EUROIMMUN; Abbott Laboratories;                                                                   | Anti-S IgA; IgG; Anti-N IgG                        | Not reported                            | Not reported                            | 8                    | Low    |
| 4  | 2                              | Wagner (88)                                         | Austria                | Vienna                                        | EU/EEA            | No                  | City/local       | Pre-print              | 12-17 Apr                     | General population | Convenience    | HH/C samples       | 1655                                     | 10.15%                                                         | ELISA; ELISA; ELISA; CLIA; MN | EUROIMMUN; Beijing Wantai Biological Pharmacy Enterprise; EUROIMMUN; Roche Diagnostics; In-house; | IgA; IgG IgM and total Abs; IgG; Total Abs; NT-Abs | Not reported                            | Not reported                            | 3                    | High   |
| 5  | 3                              | Ladage (89)                                         | Austria                | Weißkirchen/Wachau                            | EU/EEA            | No                  | City/local       | Published              | 1-15 Jun                      | General population | Convenience    | HH/C samples       | 835                                      | ELISA: IgG 8.5%; IgA 9.0%;                                     | ELISA;                        | EUROIMMUN                                                                                         | IgA; IgG                                           | Not reported                            | Not reported                            | 5                    | Medium |
| 6  | 4                              | Boey (90)                                           | Belgium                | Pelt; Alken                                   | EU/EEA            | No                  | Regional         | Published <sup>^</sup> | 21 Sept - 6 Oct               | General population | Random         | HH/C samples       | 362                                      | 4.4% (low exposed - Pelt); 14.4% (high exposed - Alken)        | ELISA;                        | Beijing Wantai Biological Pharmacy Enterprise; EUROIMMUN                                          | Total Abs;                                         | 99.6%                                   | Not reported                            | 4                    | Medium |
| 7  | 5                              | Bokanjic (91)                                       | Bosnia and Herzegovina | Republika Srpska                              | non-EU/EEA        | Yes                 | Regional         | Not yet published      | 4 Nov - 16 Dec                | General population | Random         | HH/C samples       | 1855                                     | 40.4%                                                          | ELISA                         | Beijing Wantai Biological Pharmacy Enterprise;                                                    | Total Abs;                                         | 94%                                     | 100%                                    | N/A                  | N/A    |
| 8  | 6                              | Kunchev and Stoitsova (92)                          | Bulgaria               | Plovdiv                                       | EU/EEA            | Yes                 | City/local       | Not yet published      | 18-May-13 Jun                 | General population | Random         | HH/C samples       | 553                                      | 1.08% (0.5-2.35); 0.04% (0-0.12) <sup>§</sup>                  | ELISA;                        | EUROIMMUN;                                                                                        | IgG; IgA                                           | Not reported                            | Not reported                            | N/A                  | N/A    |
| 9  | 7                              | Statens Serum Institut (93)                         | Denmark                | Copenhagen; Aarhus; Aalborg; Næstved; Odense  | EU/EEA            | Yes                 | National         | Report                 | Apr                           | General population | Random         | HH/C samples       | 1071                                     | 1.1% (0.5-1.8)                                                 | ELISA                         | Not reported                                                                                      | Not reported                                       | Not reported                            | Not reported                            | 6                    | Medium |
| 10 | 8                              | Statens Serum Institut (94) (62)                    | Denmark                | Copenhagen; Aarhus; Aalborg; Næstved; Odense  | EU/EEA            | Yes                 | National         | Report                 | 7 May - 9 Jun; 14 Aug - 1 Oct | General population | Random         | HH/C samples       | 2444; 18000                              | 1.2 (0.7-1.7); 2.2 (1.8 -2.6)                                  | ELISA                         | Beijing Wantai Biological Pharmacy Enterprise;                                                    | Not reported                                       | Not reported                            | Not reported                            | 9                    | Low    |
| 11 | 9                              | Petersen (95)                                       | Denmark                | Faroe Islands                                 | EU/EEA            | Yes                 | Regional         | Published              | 27 Apr - 1 May                | General population | Random         | HH/C samples       | 1500                                     | 0.7% <sup>§</sup>                                              | ELISA                         | Beijing Wantai Biological Pharmacy Enterprise;                                                    | IgM; IgG                                           | 94%                                     | 100%                                    | 9                    | Low    |
| 12 | 10                             | Jõgi (96)                                           | Estonia                | Tallinn; Saaremaa                             | EU/EEA            | No                  | Regional         | Pre-print              | 8 May - 31 Jul                | General population | Random         | HH/C samples       | Total 1960; Tallin: 1006; Saaremaa: 954; | Tallinn: 1.5% <sup>§</sup> ; Saaremaa: 6.7% <sup>§</sup>       | CMIA; CLIA; LIPS; LFA;        | Abbott Laboratories Liaison; In-house Biosensor                                                   | IgG; IgG; NA IgM/IgG                               | 92.7%                                   | 99.9%                                   | 12                   | Low    |
| 13 | 11                             | Finnish Institute for Health and Welfare - THL (14) | Finland                |                                               | EU/EEA            | No                  | National         | Report                 | 13 Apr - 28 Dec               | General population | Random         | HH/C samples       | 4863                                     | *see report                                                    | FMIA                          | In-house                                                                                          | Not reported                                       | Not reported                            | Not reported                            | 7                    | Low    |
| 14 | 12                             | Carrat (97)                                         | France                 | Ile-de-France; Grand Est; Nouvelle-Aquitaine; | EU/EEA            | Yes                 | National         | Pre-print              | 4 May - 23 Jun                | General population | Random         | HH/C samples       | 14628                                    | Ile-de-France: 10%; Grand Est: 9.0%; Nouvelle-Aquitaine: 3.1%; | ELISA; MN                     | EUROIMMUN; In-house                                                                               | IgG                                                | ELISA-S=97.9%; ELISA-NP=50.3%; SN=41.4% | ELISA-S=97.7%; ELISA-NP=99.5%; SN=99.5% | 9                    | Low    |

| 1  | 2                      | 3                  | 4                                                                              | 5          | 6       | 7          | 8                 | 9                                | 10                 | 11          | 12                                                          | 13                           | 14                                                  | 15                                           | 16                                                                                                               | 17                    | 18            | 19              | 20  | 21     | 22 | 23 | 24 | 25 | 26 | 27 | 28 | 29 | 30 | 31 | 32 | 33 | 34 | 35 | 36 | 37 | 38 | 39 | 40 | 41 | 42 | 43 | 44 | 45 | 46 | 47 |  |  |  |  |  |  |  |  |  |  |
|----|------------------------|--------------------|--------------------------------------------------------------------------------|------------|---------|------------|-------------------|----------------------------------|--------------------|-------------|-------------------------------------------------------------|------------------------------|-----------------------------------------------------|----------------------------------------------|------------------------------------------------------------------------------------------------------------------|-----------------------|---------------|-----------------|-----|--------|----|----|----|----|----|----|----|----|----|----|----|----|----|----|----|----|----|----|----|----|----|----|----|----|----|----|--|--|--|--|--|--|--|--|--|--|
| 13 | Zakhashvili (15)       | Georgia            | Martvili; Kobuleti; Borjomi; Khelvachauri                                      | non-EU/EEA | Yes     | National   | Not yet published | 1 – 14 Aug 2020; 1 – 14 Dec 2020 | General population | Random      | HH/C samples                                                | 1218; 1219                   | August: 0%; 0.7%; 1.3%                              | ELISA; CMIA                                  | Wantai Total Ab ELISA; Roche Diagnostics                                                                         | Total Abs; Total Abs; | Not reported  | Not reported    | N/A |        |    |    |    |    |    |    |    |    |    |    |    |    |    |    |    |    |    |    |    |    |    |    |    |    |    |    |  |  |  |  |  |  |  |  |  |  |
| 14 | Tsertsvadze (41)       | Georgia            | Tbilisi                                                                        | non-EU/EEA | No      | City/local | Pre-print         | 18-27 May                        | General population | Convenience | HH/C samples                                                | 1068                         | 1.02% (0.38-2.18) §                                 | LFA                                          | Zhejiang Orient Gene Biotech                                                                                     | IgG                   | 93.1%         | 99.2%           | 6   | Medium |    |    |    |    |    |    |    |    |    |    |    |    |    |    |    |    |    |    |    |    |    |    |    |    |    |    |  |  |  |  |  |  |  |  |  |  |
| 15 | Aziz (98)              | Germany            | Bonn                                                                           | EU/EEA     | Yes; No | City/local | Published^        | 24 Apr - 30 Jun                  | General population | Convenience | Group 1: HH/C samples (Rhineland study); Group 2: Voluntary | Group 1: 4771; Group 2: 360; | 0.97% (0.72-1.30%) 1.94% (0.84-4.42%)               | ELISA                                        | EUROIMMUN                                                                                                        | IgG                   | Not reported  | Not reported    | 7   | Low    |    |    |    |    |    |    |    |    |    |    |    |    |    |    |    |    |    |    |    |    |    |    |    |    |    |    |  |  |  |  |  |  |  |  |  |  |
| 16 | Streeck(53)            | Germany            | Heinsberg                                                                      | EU/EEA     | Yes     | City/local | Published^        | 31 Mar - 4 Jun                   | General population | Random      | HH/C samples                                                | 919                          | 14.1% (11.15% - 17.27%) §                           | ELISA                                        | EUROIMMUN;                                                                                                       | IgA; IgG              | 90.9%         | 99.1%           | 10  | Low    |    |    |    |    |    |    |    |    |    |    |    |    |    |    |    |    |    |    |    |    |    |    |    |    |    |    |  |  |  |  |  |  |  |  |  |  |
| 17 | Santos-Hövenner (54)   | Germany            | Kupferzell                                                                     | EU/EEA     | Yes     | City/local | Published         | 20 May - 9 Jun                   | General population | Random      | HH/C samples                                                | 2203                         | 12% (10.4-14%) §                                    | ELISA                                        | EUROIMMUN                                                                                                        | IgG                   | 88.3%         | 99.2%           | 10  | Low    |    |    |    |    |    |    |    |    |    |    |    |    |    |    |    |    |    |    |    |    |    |    |    |    |    |    |  |  |  |  |  |  |  |  |  |  |
| 18 | Weis (99)              | Germany            | Thuringia                                                                      | EU/EEA     | No      | Regional   | Published         | 12-22 May                        | General population | Random      | HH/C samples                                                | 626                          | 8.4%                                                | ELISA; ELISA; CLIA; CMIA; CLIA; CLIA         | EUROIMMUN; Epitope Diagnostics Inc. DiaSorin Abbott Laboratories Roche Diagnostics Snibe Co. Abbott Laboratories | IgG                   | Not reported  | Not reported    | 10  | Low    |    |    |    |    |    |    |    |    |    |    |    |    |    |    |    |    |    |    |    |    |    |    |    |    |    |    |  |  |  |  |  |  |  |  |  |  |
| 19 | Merkely (100)          | Hungary            |                                                                                | EU/EEA     | Yes     | National   | Published         | 1-16 May                         | General population | Random      | HH/C samples                                                | 10474                        | 0.68 (0.5-0.86)                                     | CMIA                                         | Abbott Laboratories                                                                                              | IgG                   | Not reported  | Not reported    | 6   | Medium |    |    |    |    |    |    |    |    |    |    |    |    |    |    |    |    |    |    |    |    |    |    |    |    |    |    |  |  |  |  |  |  |  |  |  |  |
| 20 | Pagani (43)            | Italy              | Castiglione D'Adda                                                             | EU/EEA     | Yes     | City/local | Published         | 18 May - 7 Jun                   | General population | Random      | HH/C samples                                                | 509                          | 22.6% (17.2-29.1)                                   | CMIA; LFA                                    | Abbott Laboratories ; Prima Lab                                                                                  | IgG                   | Not reported  | Not reported    | 9   | Low    |    |    |    |    |    |    |    |    |    |    |    |    |    |    |    |    |    |    |    |    |    |    |    |    |    |    |  |  |  |  |  |  |  |  |  |  |
| 21 | Stefanelli (36)        | Italy              | Trento                                                                         | EU/EEA     | Yes     | Regional   | Published         | 5-15 May                         | General population | Random      | HH/C samples                                                | 6075                         | 25.7% §                                             | CMIA                                         | Abbott Laboratories                                                                                              | IgG                   | 99.60%        | 100%            | 10  | Low    |    |    |    |    |    |    |    |    |    |    |    |    |    |    |    |    |    |    |    |    |    |    |    |    |    |    |  |  |  |  |  |  |  |  |  |  |
| 22 | Guerriero (101)        | Italy              | Verona                                                                         | EU/EEA     | Yes     | City/local | Published         | 24 Apr - 8 May                   | General population | Random      | HH/C samples                                                | 1515                         | 2.6%                                                | CMIA                                         | Abbott Laboratories                                                                                              | IgG                   | 81.80%        | 99.30%          | 8   | Low    |    |    |    |    |    |    |    |    |    |    |    |    |    |    |    |    |    |    |    |    |    |    |    |    |    |    |  |  |  |  |  |  |  |  |  |  |
| 23 | Cito (102)             | Italy              | Villa Caldari, Abruzzo region                                                  | EU/EEA     | Yes     | Regional   | Published         | 18-19 Apr                        | General population | Random      | HH/C samples                                                | 687                          | 10.9% (8.8-13.5%)                                   | ELISA                                        | Beijing Wantai Biological Pharmacy Enterprise;                                                                   | Total Abs             | 93%           | 100%            | 9   | Low    |    |    |    |    |    |    |    |    |    |    |    |    |    |    |    |    |    |    |    |    |    |    |    |    |    |    |  |  |  |  |  |  |  |  |  |  |
| 24 | Zuridin & Tatyana (34) | Kyrgyzstan         | Bishkek City; Osh City; Chui; Osh; Jalal-Abad; Batken; Issyk-Kul; Naryn; Talas | non-EU/EEA | Yes     | National   | Not yet published | 4 Jul – 12 Aug                   | General population | Random      | HH/C samples                                                | 4780                         | 32.5%                                               | ELISA                                        | Beijing Wantai Biological Pharmacy Enterprise;                                                                   | Total Abs             | 95%           | 100%            | N/A | N/A    |    |    |    |    |    |    |    |    |    |    |    |    |    |    |    |    |    |    |    |    |    |    |    |    |    |    |  |  |  |  |  |  |  |  |  |  |
| 25 | Snoeck (103)           | Luxembourg         |                                                                                | EU/EEA     | Yes     | National   | Pre-print         | 15 Apr - 5 May                   | General population | Random      | HH/C samples                                                | 1862                         | IgG: 2.09% (1.37-2.82) § IgA: 11.07% (9.54-12.60) § | ELISA                                        | EUROIMMUN;                                                                                                       | IgG; IgA;             | 85.7%; 92.2%; | 97.8%; 89.2%; 1 | 8   | Low    |    |    |    |    |    |    |    |    |    |    |    |    |    |    |    |    |    |    |    |    |    |    |    |    |    |    |  |  |  |  |  |  |  |  |  |  |
| 26 | Vos (33)               | Netherlands        |                                                                                | EU/EEA     | No      | National   | Published         | 31 Mar - 11 May                  | General Population | Random      | HH/C samples                                                | 3207                         | 2.8% (2.1 - 3.7) §                                  | Fluorescent bead-based multiplex immunoassay | In-house                                                                                                         | IgG                   | 84.40%        | Not reported    | 10  | Low    |    |    |    |    |    |    |    |    |    |    |    |    |    |    |    |    |    |    |    |    |    |    |    |    |    |    |  |  |  |  |  |  |  |  |  |  |
| 27 | Popova (104)           | Russian Federation | Irkutsk Region                                                                 | non-EU/EEA | No      | Regional   | Published         | 28 Jun - 19 Jul                  | General population | Random      | HH/C samples                                                | 2674                         | 5.8% (5.3- 6.2)                                     | ELISA                                        | In house                                                                                                         | IgG                   | Not reported  | Not reported    | 8   | Low    |    |    |    |    |    |    |    |    |    |    |    |    |    |    |    |    |    |    |    |    |    |    |    |    |    |    |  |  |  |  |  |  |  |  |  |  |
| 28 | Popova (105)           | Russian Federation | Leningrad                                                                      | non-EU/EEA | No      | Regional   | Published         | 23 Jun - 26 Jun                  | General population | Random      | HH/C samples                                                | 3130                         | 20.70%                                              | ELISA                                        | In house                                                                                                         | IgG                   | Not reported  | Not reported    | 8   | Low    |    |    |    |    |    |    |    |    |    |    |    |    |    |    |    |    |    |    |    |    |    |    |    |    |    |    |  |  |  |  |  |  |  |  |  |  |
| 29 | Barchuk (37)           | Russian Federation | Saint-Petersburg                                                               | non-EU/EEA | Yes     | City/local | Published^        | 27 May - 26 Jun                  | General population | Random      | HH/C samples                                                | 1038                         | 9.0% CMIA; 10.8% ELISA §                            | ELISA; CMIA                                  | CoronaPass; Abbott Laboratories                                                                                  | IgG; Total Abs        | 98.7%; 100%   | 100%; 99.6%     | 12  | Low    |    |    |    |    |    |    |    |    |    |    |    |    |    |    |    |    |    |    |    |    |    |    |    |    |    |    |  |  |  |  |  |  |  |  |  |  |
| 30 | Popova (106)           | Russian Federation | Saint-Petersburg                                                               | non-EU/EEA | No      | City/local | Published         | 15 Jun - 20 Jun                  | General population | Random      | HH/C samples                                                | 2713                         | 26% (24.3–27.7)                                     | ELISA                                        | In house                                                                                                         | IgG                   | Not reported  | Not reported    | 8   | Low    |    |    |    |    |    |    |    |    |    |    |    |    |    |    |    |    |    |    |    |    |    |    |    |    |    |    |  |  |  |  |  |  |  |  |  |  |

| Study ID      | Author                               | Country        | Region                            | Population | Study Design | Date       | Sample Size | Prevalence                                                                                   | Method             | Assay       | Specificity              | Sensitivity                                                | PPV                                                                                                                                              | NPV                    | LR+                                               | LR-          | Number of Studies                               | Quality Score                                 |    |        |
|---------------|--------------------------------------|----------------|-----------------------------------|------------|--------------|------------|-------------|----------------------------------------------------------------------------------------------|--------------------|-------------|--------------------------|------------------------------------------------------------|--------------------------------------------------------------------------------------------------------------------------------------------------|------------------------|---------------------------------------------------|--------------|-------------------------------------------------|-----------------------------------------------|----|--------|
| 32            | Pollan (107)                         | Spain          |                                   | non-EU/EEA | Yes          | National   | Published   | 8 - 21 Jun                                                                                   | General population | Random      | HH/C samples             | 2758                                                       | 24.5% (22.9- 26.1)                                                                                                                               | ELISA                  | In house                                          | IgG          | Not reported                                    | Not reported                                  | 8  | Low    |
| 33            | Public Health Agency of Sweden (108) | Sweden         | Rinkeby-Kista district, Stockholm | EU/EEA     | Yes          | City/local | Report      | 22 Jun - 24 Jun                                                                              | General population | Random      | HH/C samples             | 538                                                        | 18.7% (95% CI 14.8-23.3)                                                                                                                         | CMIA; CLIA; LIPS; LFA; | Abbott Laboratories; Zhejiang Orient Gene Biotech | IgG          | 100                                             | 99.6                                          | 11 | Low    |
| 34            | Roxhed (57)                          | Sweden         | Stockholm                         | EU/EEA     | Yes          | City/local | Published^  | mid-Apr - mid-May                                                                            | General population | Random      | HH/C samples             | 878                                                        | 12.5% (95% CI: 10.3%-14.7%)                                                                                                                      | ELISA                  | In house                                          | IgM; IgG     | 100%                                            | 98%                                           | 7  | Low    |
| 35            | Richard (38)                         | Switzerland    | Canton of Geneva                  | non-EU/EEA | Yes          | Regional   | Pre-print   | 6 Apr - 30 Jun                                                                               | General population | Random      | HH/C samples             | 8344                                                       | 7.8% (6.8-8.9)                                                                                                                                   | ELISA                  | EUROIMMUN                                         | IgG          | 93%                                             | 100%                                          | 10 | Low    |
| 36            | Bi (109)                             | Switzerland    | Geneva                            | non-EU/EEA | Yes          | City/local | Pre-print   | 3 Apr - 30 Jun                                                                               | General population | Random      | HH/C samples             | 4354                                                       | 6.6%                                                                                                                                             | ELISA                  | EUROIMMUN                                         | IgG          | 93%                                             | 99%                                           | 9  | Low    |
| 37            | Stringhini (32)                      | Switzerland    | Geneva                            | non-EU/EEA | Yes          | City/local | Published   | 6 April - 9 May                                                                              | General population | Random      | HH/C samples             | 2766                                                       | 1stweek: 4-8% (2-4-8-0);<br>2nd week: 8-5% (5-9-11-4);<br>3rd week: 10-9% (7-9-14-4);<br>4th week: 6-6% (4-3-9-4);<br>5th week: 10-8% (8-2-13-9) | ELISA                  | EUROIMMUN                                         | IgG          | 93%                                             | 100%                                          | 9  | Low    |
| 38            | Ward (47)                            | United Kingdom | England                           | non-EU/EEA | No           | National   | Pre-print   | 20 Jun - 13 Jul;<br>31 Jul - 13 Aug;<br>15 Sept - 28 Sept                                    | General population | Random      | HH/C samples             | 99908;<br>105829;<br>159367                                | 5.96 (5.78-6.14);<br>4.83 (4.67-5.00);<br>4.38 (4.25-4.51) §                                                                                     | LFA                    | Fortress Diagnostics                              | IgG          | 84.4%                                           | 98.6%                                         | 9  | Low    |
| 39            | Wells (110)                          | United Kingdom | London; South East England        | non-EU/EEA | Yes          | Regional   | Published   | 27 Apr - 2 Jun                                                                               | General population | Convenience | HH/C samples             | 431                                                        | 12% (9.1-15.2)                                                                                                                                   | CLIA; CMIA             | Abbott Laboratories; Roche Diagnostics            | IgM; IgG     | 90%                                             | 100%                                          | 6  | Medium |
| Residual sera |                                      |                |                                   |            |              |            |             |                                                                                              |                    |             |                          |                                                            |                                                                                                                                                  |                        |                                                   |              |                                                 |                                               |    |        |
| 40            | Herzog (56)                          | Belgium        | Wallonia Flanders; Brussels       | EU/EEA     | Yes          | National   | Pre-print   | 30 Mar - 5 Apr;<br>20 Apr - 26 Apr;<br>18 May - 25 May;<br>8 Jun - 13 Jun;<br>29 Jun - 4 Jul | General population | Convenience | Residual sera            | Total: 15529;<br>3910;<br>3397;<br>3242;<br>2960;<br>3023; | 2.9% (2.3-3.6%);<br>6.0% (5.1-7.1%);<br>6.9% (5.9-8.0%);<br>5.5% (4.7-6.5%);<br>4.5% (3.7-5.4%)                                                  | ELISA                  | EUROIMMUN;                                        | IgG          | 64.5 - 87.8%                                    | 99.20%                                        | 5  | Medium |
| 41            | Tsaneva-Damyanova (111)              | Bulgaria       | Varna city; North East Bulgaria   | EU/EEA     | Yes          | Regional   | Published   | 26 Mar - 20 Apr                                                                              | General population | Convenience | Residual sera            | 586                                                        | 4.8% overall;<br>1.0% IgM,<br>1.2% IgG<br>2.6% IgM and IgG                                                                                       | LFA                    | Zhejiang Orient Gene Biotech                      | IgM; IgG     | 85%                                             | 96%                                           | 4  | Medium |
| 42            | Bloomfield (112)                     | Czech Republic | Prague                            | EU/EEA     | Yes          | City/local | Published   | 3 Jul - 19 Aug                                                                               | General population | Convenience | Residual sera (Children) | 200                                                        | 0% (0-0.5%)                                                                                                                                      | ELISA; CLIA            | EUROIMMUN; Roche Diagnostics                      | IgA; IgG     | EUROIMMUN: IgA=98.6%; IgG=94.4%; Elecsys=99.5%; | EUROIMMUN: IgA=92%; IgG=99.6%; Elecsys=99.8%; | 3  | High   |
| 43            | Krleza (63)                          | Croatia        | Zagreb                            | EU/EEA     | No           | National   | Published^  | 13 - 29 May ;<br>24 Oct - 23 Nov                                                             | General population | Convenience | Residual sera (Children) | 240;<br>308                                                | 2.9%;<br>8.4%                                                                                                                                    | ELISA; CLIA; MN        | Vircell; Roche Cobas Elecsys; In-house            | Not reported | Not reported                                    | Not reported                                  | 3  | High   |
| 44            | Capai (113)                          | France         | Corsica                           | EU/EEA     | Yes          | Regional   | Published   | 16 Apr - 15 Jun                                                                              | General population | Convenience | Residual sera            | 1973                                                       | 5.5% (4.5-6.6%) §                                                                                                                                | ELISA; MN              | EUROIMMUN; In-house                               | IgG          | Not reported                                    | Not reported                                  | 8  | Low    |
| 45            | Cohen (114)                          | France         |                                   | EU/EEA     | Yes          | City/local | Pre-print   | 14 Apr - 12 May                                                                              | General population | Convenience | Residual sera (Children) | 605                                                        | 10.7% (8.4-13.5)                                                                                                                                 | LFA                    | Biosynex BSS test                                 | IgM; IgG     | 91.8%                                           | 99.2%                                         | 5  | Medium |
| 46            | Le Vu (61)                           | France         |                                   | EU/EEA     | Yes          | National   | Published^  | 9 Mar - 15 Mar;<br>6 Apr - 12 Apr;<br>11 May - 17 May;                                       | General population | Convenience | Residual sera            | Total: 11 021;<br>3834;<br>3595;<br>3592;                  | March:0.41% [0.05-0.88] §;<br>April: 4.14% [3.31-4.99] §;<br>May: 4.93% [4.02-5.89] §                                                            | LuLISA; MN             | In-house; In-house;                               | IgG; NT-Abs  | LuLISA N=86%; LuLISA S=96%                      | LuLISA N=100%; LuLISA S=100%                  | 13 | Low    |

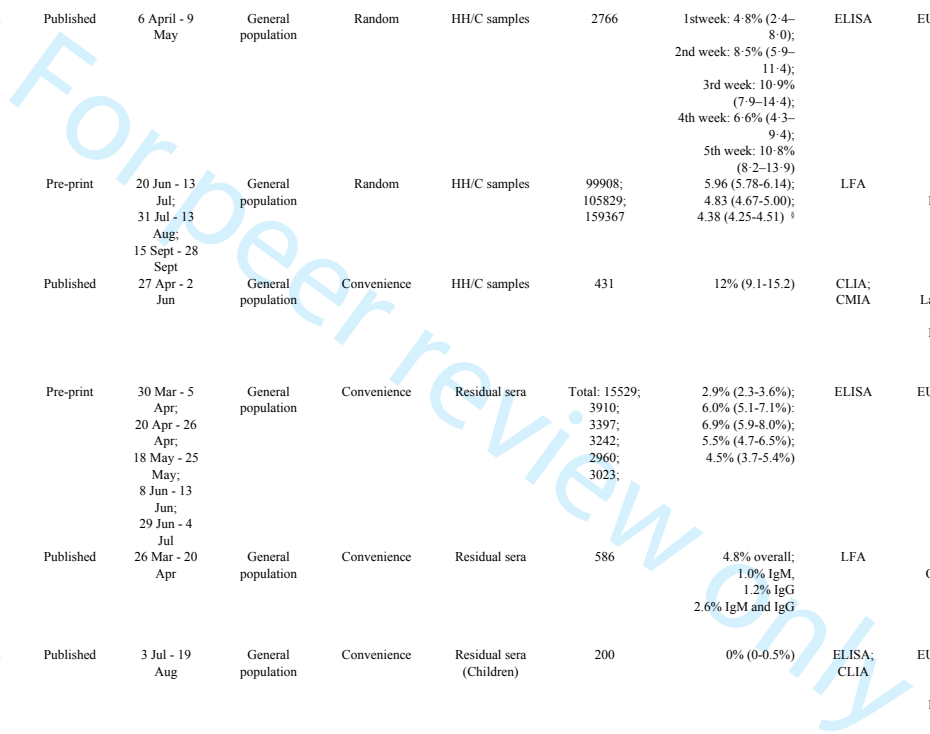

| Study ID     | Author(s)          | Country                                 | Region                 | EU/EEA                                                        | Yes/No     | Level              | Status     | Period                                              | Population                                                         | Convenience        | Sample Size                | Prevalence                                                                                                                                                                                                                                                                                                                      | Method                                                                                                                                                                                                                                                                              | Lab                                     | Antibody                                       | Sensitivity  | Specificity         | Accuracy            | Prevalence | CI     |      |
|--------------|--------------------|-----------------------------------------|------------------------|---------------------------------------------------------------|------------|--------------------|------------|-----------------------------------------------------|--------------------------------------------------------------------|--------------------|----------------------------|---------------------------------------------------------------------------------------------------------------------------------------------------------------------------------------------------------------------------------------------------------------------------------------------------------------------------------|-------------------------------------------------------------------------------------------------------------------------------------------------------------------------------------------------------------------------------------------------------------------------------------|-----------------------------------------|------------------------------------------------|--------------|---------------------|---------------------|------------|--------|------|
| 47           | Bogianni dou (115) | Greece                                  |                        | EU/EEA                                                        | Yes        | National           | Published  | 1 Mar - 30 Apr                                      | General population                                                 | Convenience        | 6586                       | March = 0 (0-0.23%) <sup>†</sup> ; April=0.23% (0-0.48%) <sup>‡</sup>                                                                                                                                                                                                                                                           | ELISA; ELISA; CMIA                                                                                                                                                                                                                                                                  | EUROIMMUN; Viacell; Abbott Laboratories | IgG                                            | 84%          | 99.7%               |                     | 8          | Low    |      |
| 1            | 48                 | Gudbjartsson (13)                       | Iceland                | EU/EEA                                                        | Yes        | Regional; National | Published  | 18 Feb - 9 Mar                                      | General population                                                 | Convenience        | 470; 24115                 | 0%; Residual sera: 0.30% (0.2 - 0.4) §; Reykjavik: 0.4% (0.3 - 0.6)                                                                                                                                                                                                                                                             | ELISA; ELISA; ELISA; CLIA                                                                                                                                                                                                                                                           | EUROIMMUN; EDI/Eagle; Roche Diagnostics | IgA; IgM; IgG                                  | Not reported | 99.80%              |                     | 9          | Low    |      |
| 4            | 49                 | Public Health Agency of Sweden (65, 66) | Sweden                 | EU/EEA                                                        | No         | National           | Report     | 20 Apr to 12 Jun; 12 Oct to 23 Oct; Nov 23 to 4 Dec | General population                                                 | Convenience        | 4500 per collection period | 20 April-26 April: 5.3% (3.8-7.1); 27 April-3 May: 4% (2.71-5.67); 4 May - 10 May: 3.9% (2.61-5.42); 11-17 May: 4.5% (3.07-6.15); 18-24 May: 5.2% (3.67-7); 25-31 May: 5.7% (3.98-7.72); 1-7 June: 6.8% (5.07-8.80); 8-14 June: 5.2% (3.74-7.06); 12-23 October: 6.7% (5.67-7.79); 23 November to 4 December: 7.9% (6.79-9.19); | Not reported                                                                                                                                                                                                                                                                        | Sci Life Lab / KTH                      | Not reported                                   | 98.9         | 99.4                |                     | 6          | Low    |      |
| 15           | 50                 | Posfay-Barbe (116)                      | Switzerland            | Geneva                                                        | non-EU/EEA | No                 | City/local | Published                                           | 1-30 Apr                                                           | General population | Convenience                | 208                                                                                                                                                                                                                                                                                                                             | ELISA: 9.1%; LFA: 12.5%                                                                                                                                                                                                                                                             | ELISA; LFA                              | EUROIMMUN                                      | IgG          | Not reported; 88.9% | Not reported; 94.7% |            | 2      | High |
| 17           | 51                 | Dickson (117)                           | United Kingdom         | Scotland                                                      | non-EU/EEA | Yes                | National   | Published                                           | 20 Apr - 15 Jun                                                    | General population | Convenience                | 4751                                                                                                                                                                                                                                                                                                                            | 4.3% (4.2-4.5)                                                                                                                                                                                                                                                                      | CLIA                                    | DiaSorin Liaison                               | IgG          | 87.5%               | 98.6%               |            | 3      | High |
| 18           | 52                 | Public Health Scotland (64)             | United Kingdom         | Scotland                                                      | EU/EEA     | Yes                | National   | Report                                              | 20 Apr - 17 May; 18 May - 14 Jun; 15 Jun - 12 Jul; 13 Jul - 9 Aug; | General population | Convenience                | 2039; 2172; 2709; 2882                                                                                                                                                                                                                                                                                                          | 4.1% (2.4%, 5.7%); 3.4% (1.8%, 5.0%); 3.9% (2.3%, 5.4%); 3.7% (2.2%, 5.2%)                                                                                                                                                                                                          | CMIA                                    | DiaSorin Liaison                               | Not reported | Not reported        | Not reported        | 4          | Medium |      |
| Blood donors |                    |                                         |                        |                                                               |            |                    |            |                                                     |                                                                    |                    |                            |                                                                                                                                                                                                                                                                                                                                 |                                                                                                                                                                                                                                                                                     |                                         |                                                |              |                     |                     |            |        |      |
| 25           | 53                 | Musa (40)                               | Bosnia and Herzegovina | Federation of Bosnia and Herzegovina                          | non-EU/EEA | Yes                | Regional   | Not yet published                                   | 1 Nov - 7 Dec                                                      | Blood donors       | Convenience                | 1015                                                                                                                                                                                                                                                                                                                            | 19.1% (16.7-21.5)                                                                                                                                                                                                                                                                   | CMIA                                    | Abbott Laboratories                            | Total Abs;   | Not reported        | Not reported        | N/A        | N/A    |      |
| 27           | 54                 | Pedersen (35)                           | Denmark                | Danish Capital Region; Zealand Region; Central Denmark Region | EU/EEA     | Yes                | National   | Published                                           | 2 Jun - 19 Jun                                                     | Blood donors       | Convenience                | Total: 2311; 17-69yrs: 1110; >70yrs: 1201                                                                                                                                                                                                                                                                                       | 17-69yrs: 2.5 (1.3-3.8) <sup>§</sup> >70yrs: 1.4 (0.3-2.5) <sup>§</sup>                                                                                                                                                                                                             | ELISA                                   | Beijing Wantai Biological Pharmacy Enterprise; | Total Abs;   | 96.7% (92.4-98.6)   | 99.5% (98.7-99.8)   |            | 7      | Low  |
| 31           | 55                 | Erikstrup (118)                         | Denmark                |                                                               | EU/EEA     | Yes                | National   | Published <sup>^</sup>                              | 6 Apr - 3 May                                                      | Blood donors       | Random                     | 20 640                                                                                                                                                                                                                                                                                                                          | 2.0% (95% CI, 1.8-2.2%); 1.9% (95% CI, 1.8-2.3) <sup>‡</sup>                                                                                                                                                                                                                        | LFA                                     | Livzon Diagnostics Inc                         | IgM; IgG     | 82.6%               | 99.5%               |            | 7      | Low  |
| 32           | 56                 | Bloddonor (119)                         | Denmark                |                                                               | EU/EEA     | No                 | National   | Report                                              | 5 Oct - 31 Dec                                                     | Blood donors       | Convenience                | 71883                                                                                                                                                                                                                                                                                                                           | October : 2.1% (1.1-2.7) ; October : 1.9% (0.9-2.5) ; October : 2.3% (1.3-2.8) ; October : 2.1% (1.1-2.7) ; November : 2.2% (1.2-2.7) ; November : 2.7% (1.6-3.2) ; November : 2.8% (1.7-3.4) ; November : 3.2% (2.1-3.8) ; December : 3.2% (2.2-3.9) ; December : 2.9% (1.8-3.5) ; | LFA                                     | Livzon                                         | Not reported | Not reported        | Not reported        | 4          | Medium |      |

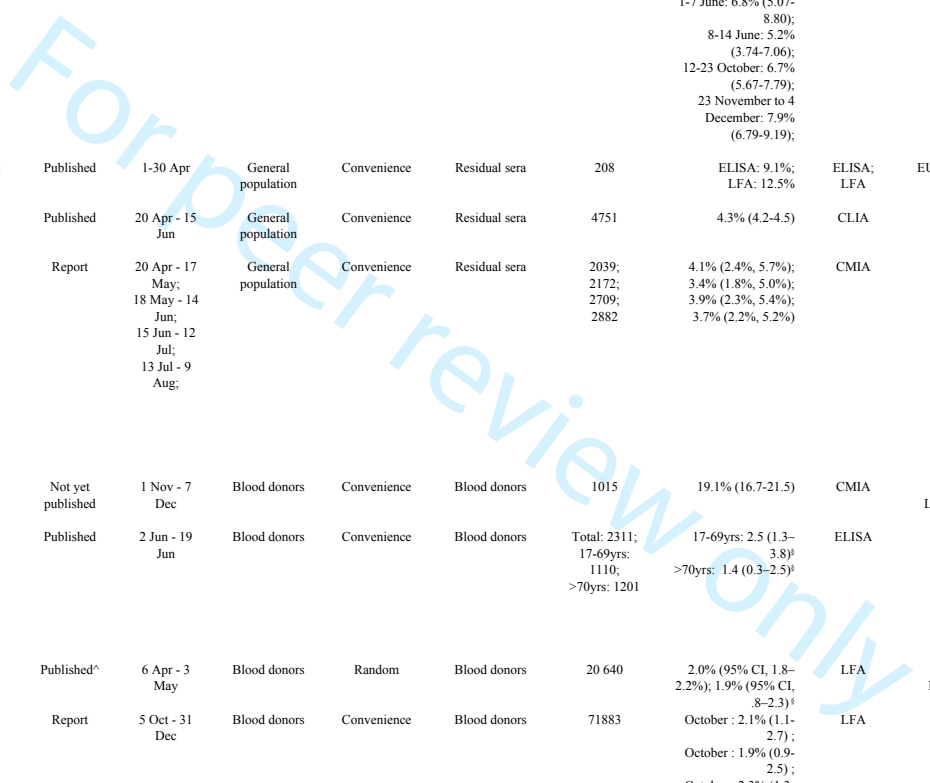

|    |    |                               |                |                                                                                             |            |     |            |           |                 |              |             |              |                          |                                                                                                                                                                                                                                                                                                                                     |                   |                                                                                      |               |                        |                                        |     |        |
|----|----|-------------------------------|----------------|---------------------------------------------------------------------------------------------|------------|-----|------------|-----------|-----------------|--------------|-------------|--------------|--------------------------|-------------------------------------------------------------------------------------------------------------------------------------------------------------------------------------------------------------------------------------------------------------------------------------------------------------------------------------|-------------------|--------------------------------------------------------------------------------------|---------------|------------------------|----------------------------------------|-----|--------|
| 1  |    |                               |                |                                                                                             |            |     |            |           |                 |              |             |              |                          |                                                                                                                                                                                                                                                                                                                                     |                   |                                                                                      |               |                        |                                        |     |        |
| 2  |    |                               |                |                                                                                             |            |     |            |           |                 |              |             |              |                          |                                                                                                                                                                                                                                                                                                                                     |                   |                                                                                      |               |                        |                                        |     |        |
| 3  |    |                               |                |                                                                                             |            |     |            |           |                 |              |             |              |                          |                                                                                                                                                                                                                                                                                                                                     |                   |                                                                                      |               |                        |                                        |     |        |
| 4  |    |                               |                |                                                                                             |            |     |            |           |                 |              |             |              |                          |                                                                                                                                                                                                                                                                                                                                     |                   |                                                                                      |               |                        |                                        |     |        |
| 5  |    |                               |                |                                                                                             |            |     |            |           |                 |              |             |              |                          |                                                                                                                                                                                                                                                                                                                                     |                   |                                                                                      |               |                        |                                        |     |        |
| 6  |    |                               |                |                                                                                             |            |     |            |           |                 |              |             |              |                          |                                                                                                                                                                                                                                                                                                                                     |                   |                                                                                      |               |                        |                                        |     |        |
| 7  | 57 | Gallian (46)                  | France         | Haut-Rhin departmental area [DA]; Seine-Saint-Denis DA; Bouches-du-Rhône DA; Oise DA; Lille | EU/EEA     | No  | National   | Published | 23 Mar - 5 Apr  | Blood donors | Convenience | Blood donors | 998                      | 2.71%                                                                                                                                                                                                                                                                                                                               | MN                | In-house                                                                             | NT-Abs        | Not reported           | 100%                                   | 6   | Medium |
| 8  |    |                               |                |                                                                                             |            |     |            |           |                 |              |             |              |                          |                                                                                                                                                                                                                                                                                                                                     |                   |                                                                                      |               |                        |                                        |     |        |
| 9  |    |                               |                |                                                                                             |            |     |            |           |                 |              |             |              |                          |                                                                                                                                                                                                                                                                                                                                     |                   |                                                                                      |               |                        |                                        |     |        |
| 10 |    |                               |                |                                                                                             |            |     |            |           |                 |              |             |              |                          |                                                                                                                                                                                                                                                                                                                                     |                   |                                                                                      |               |                        |                                        |     |        |
| 11 | 58 | Grzelak (120)                 | France         |                                                                                             | EU/EEA     | No  | City/local | Published | 20-24 Mar       | Blood donors | Convenience | Blood donors | 200                      | 3%                                                                                                                                                                                                                                                                                                                                  | ELISA; LIPS; MN   | In-house; In-house; In-house;                                                        | IgA; IgG; IgM | Not reported           | Not reported                           | 3   | High   |
| 12 |    |                               |                |                                                                                             |            |     |            |           |                 |              |             |              |                          |                                                                                                                                                                                                                                                                                                                                     |                   |                                                                                      |               |                        |                                        |     |        |
| 13 |    |                               |                |                                                                                             |            |     |            |           |                 |              |             |              |                          |                                                                                                                                                                                                                                                                                                                                     |                   |                                                                                      |               |                        |                                        |     |        |
| 14 | 59 | Fischer (121)                 | Germany        | Hesse; Lower Saxony; North Rhine-Westphalia                                                 | EU/EEA     | Yes | National   | Published | Mar - Jun       | Blood donors | Convenience | Blood donors | 3186                     | 0.91% (0.58-1.24)                                                                                                                                                                                                                                                                                                                   | ELISA; CLIA; CMIA | EUROIMMUN; Diasorin Liaison; Abbott Laboratories                                     | IgG           | 65%                    | 99-100%                                | 4   | Medium |
| 15 |    |                               |                |                                                                                             |            |     |            |           |                 |              |             |              |                          |                                                                                                                                                                                                                                                                                                                                     |                   |                                                                                      |               |                        |                                        |     |        |
| 16 |    |                               |                |                                                                                             |            |     |            |           |                 |              |             |              |                          |                                                                                                                                                                                                                                                                                                                                     |                   |                                                                                      |               |                        |                                        |     |        |
| 17 | 60 | Runkel (17)                   | Germany        | Southwest                                                                                   | EU/EEA     | Yes | Regional   | Published | Mar - Jun       | Blood donors | Convenience | Blood donors | 3754                     | 0.40%                                                                                                                                                                                                                                                                                                                               | ELISA; CLIA; CMIA | Epitope Diagnostics; IDK5000 Immundiagnostik AG; Abbott Architect; Roche Diagnostics | IgG           | Not reported           | Abbott=99.6%; IDK5000=99.1%; EDI=96.4% | 7   | Low    |
| 18 |    |                               |                |                                                                                             |            |     |            |           |                 |              |             |              |                          |                                                                                                                                                                                                                                                                                                                                     |                   |                                                                                      |               |                        |                                        |     |        |
| 19 |    |                               |                |                                                                                             |            |     |            |           |                 |              |             |              |                          |                                                                                                                                                                                                                                                                                                                                     |                   |                                                                                      |               |                        |                                        |     |        |
| 20 |    |                               |                |                                                                                             |            |     |            |           |                 |              |             |              |                          |                                                                                                                                                                                                                                                                                                                                     |                   |                                                                                      |               |                        |                                        |     |        |
| 21 | 61 | Percivalle (122)              | Italy          | Lombardy                                                                                    | EU/EEA     | Yes | City/local | Published | 18 Mar - 6 Apr  | Blood donors | Convenience | Blood donors | 390                      | 23%                                                                                                                                                                                                                                                                                                                                 | MN                | In-house                                                                             | NT-Abs        | 95%                    | 100%                                   | 6   | Medium |
| 22 |    |                               |                |                                                                                             |            |     |            |           |                 |              |             |              |                          |                                                                                                                                                                                                                                                                                                                                     |                   |                                                                                      |               |                        |                                        |     |        |
| 23 |    |                               |                |                                                                                             |            |     |            |           |                 |              |             |              |                          |                                                                                                                                                                                                                                                                                                                                     |                   |                                                                                      |               |                        |                                        |     |        |
| 24 | 62 | Fiore (44)                    | Italy          | South East                                                                                  | EU/EEA     | No  | Regional   | Published | 1-31 May        | Blood donors | Convenience | Blood donors | 904                      | 0.99%                                                                                                                                                                                                                                                                                                                               | CLIA              | Snibe Co., Ltd.                                                                      | IgM; IgG      | IgM=78.65%; IgG=91.21% | IgM=97.5%; IgG=97.3%                   | 4   | Medium |
| 25 |    |                               |                |                                                                                             |            |     |            |           |                 |              |             |              |                          |                                                                                                                                                                                                                                                                                                                                     |                   |                                                                                      |               |                        |                                        |     |        |
| 26 | 63 | Valenti (58)                  | Italy          | Milan                                                                                       | EU/EEA     | Yes | City/local | Pre-print | 24 Feb - 8 Apr  | Blood donors | Convenience | Blood donors | 789                      | February/March: 2.7% (95% 0.3-6.0%) ; March/April: 5.2% (2.4-9.0)§                                                                                                                                                                                                                                                                  | LFA               | Prima Lab                                                                            | IgM; IgG      | IgM=68%; IgG=100%      | 10                                     | Low |        |
| 27 |    |                               |                |                                                                                             |            |     |            |           |                 |              |             |              |                          |                                                                                                                                                                                                                                                                                                                                     |                   |                                                                                      |               |                        |                                        |     |        |
| 28 | 64 | Slot (48)                     | Netherlands    |                                                                                             | EU/EEA     | Yes | National   | Published | 1-15 Apr        | Blood donors | Convenience | Blood donors | 7361                     | 3.40%                                                                                                                                                                                                                                                                                                                               | ELISA             | Beijing Wantai Biological Pharmacy Enterprise; Zhejiang Orient Gene Biotech          | IgA; IgM; IgG | 100%                   | 99.1-100%                              | 5   | Medium |
| 29 |    |                               |                |                                                                                             |            |     |            |           |                 |              |             |              |                          |                                                                                                                                                                                                                                                                                                                                     |                   |                                                                                      |               |                        |                                        |     |        |
| 30 |    |                               |                |                                                                                             |            |     |            |           |                 |              |             |              |                          |                                                                                                                                                                                                                                                                                                                                     |                   |                                                                                      |               |                        |                                        |     |        |
| 31 | 65 | Lundkvist (18)                | Sweden         | Djurgårdsstaden and Tensta (Stockholm)                                                      | EU/EEA     | Yes | City/local | Published | 17-18 Jun       | Blood donors | Random      | Blood donors | 213                      | Djurgårdsstaden: 4.1% (0.6-7.6%); Tensta: 30.0% (20.3-39.7%)                                                                                                                                                                                                                                                                        | LFA               | Zhejiang Orient Gene Biotech                                                         | IgM; IgG      | IgM=100%; IgG=100%     | IgM=100%; IgG=95.5%                    | 6   | Medium |
| 32 |    |                               |                |                                                                                             |            |     |            |           |                 |              |             |              |                          |                                                                                                                                                                                                                                                                                                                                     |                   |                                                                                      |               |                        |                                        |     |        |
| 33 | 66 | Public Health England (67-72) | United Kingdom | England                                                                                     | non-EU/EEA | Yes | National   | Report    | 23 Mar - 3 Dec  | Blood donors | Convenience | Blood donors | 1000 samples/week/region | 6 May - 29 May: 8.3 (7.5-9.2)<br>4 June - 29 June: 7.6 (6.9-8.4)<br>29 June - 28 July: 5.9 (5.3-6.5)<br>20 July - 16 August: 5.5 (4.9-6.1);<br>13 August - 6 September: 5.8 (5.1-6.4);<br>24 August - 18 September: 6.1 (5.4 - 6.8);<br>21 October - 13 November: 6.0% (5.4 - 6.6);<br>16 November - 13 December: 6.9% (6.3 - 7.6)§ | ELISA             | EUROIMMUN                                                                            | IgG           | 79%                    | 99%                                    | 4   | Medium |
| 34 |    |                               |                |                                                                                             |            |     |            |           |                 |              |             |              |                          |                                                                                                                                                                                                                                                                                                                                     |                   |                                                                                      |               |                        |                                        |     |        |
| 35 |    |                               |                |                                                                                             |            |     |            |           |                 |              |             |              |                          |                                                                                                                                                                                                                                                                                                                                     |                   |                                                                                      |               |                        |                                        |     |        |
| 36 |    |                               |                |                                                                                             |            |     |            |           |                 |              |             |              |                          |                                                                                                                                                                                                                                                                                                                                     |                   |                                                                                      |               |                        |                                        |     |        |
| 37 |    |                               |                |                                                                                             |            |     |            |           |                 |              |             |              |                          |                                                                                                                                                                                                                                                                                                                                     |                   |                                                                                      |               |                        |                                        |     |        |
| 38 |    |                               |                |                                                                                             |            |     |            |           |                 |              |             |              |                          |                                                                                                                                                                                                                                                                                                                                     |                   |                                                                                      |               |                        |                                        |     |        |
| 39 |    |                               |                |                                                                                             |            |     |            |           |                 |              |             |              |                          |                                                                                                                                                                                                                                                                                                                                     |                   |                                                                                      |               |                        |                                        |     |        |
| 40 | 67 | Thompson (123)                | United Kingdom | Scotland                                                                                    | non-EU/EEA | Yes | National   | Published | 17 Mar - 18 May | Blood donors | Convenience | Blood donors | 3500                     | 3.17%                                                                                                                                                                                                                                                                                                                               | CLIA; CMIA        | Abbott Laboratories; Roche Diagnostics                                               | IgM; IgG      | 94.1%                  | 100%                                   | 8   | Low    |
| 41 |    |                               |                |                                                                                             |            |     |            |           |                 |              |             |              |                          |                                                                                                                                                                                                                                                                                                                                     |                   |                                                                                      |               |                        |                                        |     |        |
| 42 |    |                               |                |                                                                                             |            |     |            |           |                 |              |             |              |                          |                                                                                                                                                                                                                                                                                                                                     |                   |                                                                                      |               |                        |                                        |     |        |
| 43 |    |                               |                |                                                                                             |            |     |            |           |                 |              |             |              |                          |                                                                                                                                                                                                                                                                                                                                     |                   |                                                                                      |               |                        |                                        |     |        |
| 44 |    |                               |                |                                                                                             |            |     |            |           |                 |              |             |              |                          |                                                                                                                                                                                                                                                                                                                                     |                   |                                                                                      |               |                        |                                        |     |        |
| 45 |    |                               |                |                                                                                             |            |     |            |           |                 |              |             |              |                          |                                                                                                                                                                                                                                                                                                                                     |                   |                                                                                      |               |                        |                                        |     |        |
| 46 |    |                               |                |                                                                                             |            |     |            |           |                 |              |             |              |                          |                                                                                                                                                                                                                                                                                                                                     |                   |                                                                                      |               |                        |                                        |     |        |
| 47 |    |                               |                |                                                                                             |            |     |            |           |                 |              |             |              |                          |                                                                                                                                                                                                                                                                                                                                     |                   |                                                                                      |               |                        |                                        |     |        |

| 68                                                  | Public Health Scotland (64) | United Kingdom         | Scotland       | EU/EEA                       | Yes        | National | Report     | 29 Jun - 9 Aug | Blood donors    | Convenience        | BMJ Open    | 3220                                             | 3.1% (2.5%, 3.8%)                                                              | Not reported                                                                              | Not reported      | Not reported                                  | Not reported  | Not reported                 | 5                             | High |        |
|-----------------------------------------------------|-----------------------------|------------------------|----------------|------------------------------|------------|----------|------------|----------------|-----------------|--------------------|-------------|--------------------------------------------------|--------------------------------------------------------------------------------|-------------------------------------------------------------------------------------------|-------------------|-----------------------------------------------|---------------|------------------------------|-------------------------------|------|--------|
| <b>1 Patients seeking healthcare (non-COVID-19)</b> |                             |                        |                |                              |            |          |            |                |                 |                    |             |                                                  |                                                                                |                                                                                           |                   |                                               |               |                              |                               |      |        |
| 2                                                   | 69                          | Fogel (124)            | France         | Paris                        | EU/EEA     | No       | City/local | Published      | 1 Jun - 31 Aug  | General population | Convenience | Patients seeking care (non-COVID-19)             | 249                                                                            | 2.8%                                                                                      | CMIA              | Abbott Laboratories                           | IgG           | Not reported                 | Not reported                  | 2    | High   |
| 3                                                   | 70                          | Choi (125)             | Germany        | Berlin                       | EU/EEA     | No       | City/local | Published      | 19 Mar - 19 May | General population | Convenience | Patients seeking care (non-COVID-19)             | 223                                                                            | 7.20%                                                                                     | ELISA; IFIT; PRNT | EUROIMMUN; In house; In house                 | IgA; IgG      | Not reported                 | Not reported                  | 1    | High   |
| 5                                                   | 71                          | Rauber (126)           | Germany        | Heidelberg                   | EU/EEA     | No       | City/local | Published      | 5 May - 8 Jun   | General population | Convenience | Patients seeking care (non-COVID-19)             | 219                                                                            | 3.2%                                                                                      | ELISA             | EUROIMMUN                                     | IgG           | 94.6%                        | 99.8%                         | 1    | High   |
| 7                                                   | 72                          | Zambelli (29)          | Italy          | Bergamo                      | EU/EEA     | No       | City/local | Published      | 1-30 Apr        | General population | Convenience | Patients seeking care (non-COVID-19)             | 560                                                                            | 31%                                                                                       | LFA               | Moers                                         | IgM; IgG      | Not reported                 | Not reported                  | 2    | High   |
| 9                                                   | 73                          | Medas (127)            | Italy          | Cagliari                     | EU/EEA     | No       | City/local | Published      | 31 Mar - 30 Jun | General population | Convenience | Patients seeking care (non-COVID-19)             | 86                                                                             | 5.8%                                                                                      | CLIA              | Snibe Co., Ltd                                | IgM; IgG      | Not reported                 | Not reported                  | 1    | High   |
| 10                                                  | 74                          | Capasso (128)          | Italy          | Campania Region              | EU/EEA     | No       | Regional   | Published      | 11 May - 15 Jun | General population | Convenience | Patients seeking care (non-COVID-19)             | 310                                                                            | 2.90%                                                                                     | LFA               | Shanghai Kehua LFAI                           | IgM; IgG      | 66%                          | 96.60%                        | 4    | Medium |
| 12                                                  | 75                          | Cento (129)            | Italy          | Milan                        | EU/EEA     | No       | City/local | Published      | 11 May - 5 Jul  | General population | Convenience | Patients seeking care (non-COVID-19)             | 2753                                                                           | 5.1% (4.3%-6.0%)                                                                          | CLIA; CLIA        | Abbott Laboratories DiaSorin Liaison In house | IgG           | 84.2-100%                    | 99.6-100%                     | 4    | Medium |
| 14                                                  | 76                          | Berte (130)            | Italy; Germany | Milan and Cagliari; Erlangen | EU/EEA     | No       | Regional   | Published      | Apr - Jun       | General population | Convenience | Patients seeking care (non-COVID-19)             | 354; Milan, Italy: 129; Cagliari, Italy: 48; Erlangen, Germany: 177            | 2.3% (0.8- 3.8)                                                                           | ELISA             |                                               | IgA; IgG      | IgA=71.4%; IgG=97.64%        | IgA=99.8%; IgG=95.2%          | 4    | Medium |
| 17                                                  | 77                          | Vena (45)              | Italy          | Liguria; Lombardia           | EU/EEA     | No       | Regional   | Published      | Mar - Apr       | General population | Convenience | Patients seeking care (non-COVID-19)             | 3609                                                                           | 11% (10.0-12.1)                                                                           | CLIA; LFA; LFA    | MaglumiTM; Realy tech; Biosynex BSS           | IgM; IgG      | IgM=78.6-100%; IgG=90.6-100% | IgM=88.7-97.5%; IgG=90.6-100% | 4    | Medium |
| 20                                                  | 78                          | Cabezón-Gutiérrez (30) | Spain          | Madrid                       | EU/EEA     | No       | City/local | Published      | 29 May - 19 Jun | General population | Convenience | Patients seeking care (non-COVID-19)             | 229                                                                            | 31.40%                                                                                    | LFA               | Hangzhou Testsea Biotechnology                | IgM; IgG      | IgM=88%; IgG=96%             | IgM=100%; IgG=100%            | 4    | Medium |
| 21                                                  | 79                          | Prados (131)           | Spain          |                              | EU/EEA     | No       | National   | Published      | 27 Apr - 26 Jun | General population | Convenience | Patients seeking care (non-COVID-19)             | 6140                                                                           | 0.70%                                                                                     | ELISA             | EDI Epitope Diagnostics                       | IgM; IgG      | Not reported                 | Not reported                  | 3    | High   |
| 23                                                  | 80                          | Clarke (28)            | United Kingdom | London                       | non-EU/EEA | No       | City/local | Published      | 27 Apr - 7 May  | General population | Convenience | Patients seeking care (non-COVID-19)             | 356                                                                            | 36.2%                                                                                     | CMIA              | Abbott Laboratories                           | IgG           | Not reported                 | Not reported                  | 3    | High   |
| 24                                                  | 81                          | Predecki (132)         | United Kingdom | London                       | non-EU/EEA | No       | City/local | Published      | 1-30 Jun        | General population | Convenience | Patients seeking care (non-COVID-19)             | 855                                                                            | 8.1% (95% CI, 6.4 to 10.1); 10.4% (8.5 - 12.6%) CMIA + LFA results                        | CMIA; LFA         | Abbott Laboratories; Fortress Diagnostics     | IgG           | 90.6%; 96.5%                 | Not reported                  | 4    | Medium |
| <b>27 Pregnant or parturient women</b>              |                             |                        |                |                              |            |          |            |                |                 |                    |             |                                                  |                                                                                |                                                                                           |                   |                                               |               |                              |                               |      |        |
| 28                                                  | 82                          | Egerup (19)            | Denmark        | Copenhagen                   | EU/EEA     | No       | City/local | Published      | 4 Apr - 3 Jul   | General population | Convenience | Pregnant or parturient women; Partners: Newborns | Total: 3707; Pregnant or parturient women: 1313 Partners: 1188; Newborns: 1206 | Pregnant or parturient women: 2.6% (1.7-4.0)* Partners: 3.5% (2.3 - 5.1)* Newborns: 1.4%* | CLIA              | Shenzhen Yhlo Biotech                         | IgM; IgG      | IgM=42%; IgG=94%             | IgM=99.7%; IgG=99.3%          | 7    | Low    |
| 32                                                  | 83                          | Mattern (20)           | France         | Paris                        | EU/EEA     | Yes      | City/local | Published      | 4-31 May        | General population | Convenience | Pregnant or parturient women                     | 249                                                                            | 8%                                                                                        | CMIA              | Abbott Laboratories                           | IgG           | Not reported                 | Not reported                  | 3    | High   |
| 34                                                  | 84                          | Tsatsaris (21)         | France         | Paris                        | EU/EEA     | Yes      | City/local | Published      | 29 Apr - 26 Jun | General population | Convenience | Pregnant or parturient women                     | 529                                                                            | 4.7% (3.0-6.7%)                                                                           | CMIA              | Abbott Laboratories                           | IgG           | 92.7 - 97.3 %                | >99%                          | 3    | High   |
| 35                                                  | 85                          | Cosma (22)             | Italy          | Turin4/6/2020                | EU/EEA     | No       | City/local | Published      | 16 Apr - 4 Jun  | General population | Convenience | Pregnant or parturient women                     | 138                                                                            | 5.80%                                                                                     | CLIA; LFA; LFA    | DiaSorin Liaison; Boditech; AFIAS             | IgM; IgG      | Not reported                 | Not reported                  | 2    | High   |
| 38                                                  | 86                          | Crovetto (23)          | Spain          | Madrid                       | EU/EEA     | Yes      | City/local | Pre-print      | 14 Apr - 5 May  | General population | Convenience | Pregnant or parturient women                     | 874                                                                            | 14.3%                                                                                     | CLIA              | Vircell                                       | IgA; IgM; IgG | IgM/IgA=89 %; IgG=70%        | IgM/IgA=99 %; IgG=89%         | 2    | High   |
| 39                                                  | 87                          | Villalain(24)          | Spain          | Madrid                       | EU/EEA     | No       | City/local | Published      | 28 Feb - 10 May | General population | Convenience | Pregnant or parturient women                     | 769                                                                            | 11.2%                                                                                     | ELISA             | In house                                      | IgG           | Not reported                 | Not reported                  | 2    | High   |
| 41                                                  | 88                          | Lumley (25)            | United Kingdom | Oxford                       | non-EU/EEA | Yes      | City/local | Published      | 14 Apr - 15 Jun | General population | Convenience | Pregnant or parturient women                     | 1000                                                                           | 5.3% (4.0-6.9)                                                                            | CLIA              | In house                                      | IgG           | 99.1%                        | 99%                           | 4    | Medium |

## Other/Multiple populations

|    |     |                   |                     |                                               |            |     |            |                   |                                  |          |              |                                             |                  |                                                      |                     |                                                          |               |                       |                      |     |        |
|----|-----|-------------------|---------------------|-----------------------------------------------|------------|-----|------------|-------------------|----------------------------------|----------|--------------|---------------------------------------------|------------------|------------------------------------------------------|---------------------|----------------------------------------------------------|---------------|-----------------------|----------------------|-----|--------|
| 1  | 89  | Krátká (133)      | Czech Republic      | Stratonice; Pisek                             | EU/EEA     | No  | Regional   | Published         | 4-15 May                         | Other    | Not reported | Employees                                   | 2011             | Stratonice 2.9%; Pisek 1.9%                          | ELISA               | EUROIMMUN; N;                                            | IgA; IgG      | IgA=98.6%; IgG=94.4%  | IgA=92%; IgG=99.6%   | 5   | Medium |
| 2  | 3   | Jerkovic (134)    | Croatia             | Split-Dalmatia; Sibenik-Knin County           | EU/EEA     | No  | Regional   | Published         | 23-28 Apr                        | Other    | Convenience  | Employees - voluntary                       | 1494             | 1.27% (0.8-2.0%)                                     | LFA                 | AMP Diagnostics                                          | IgM; IgG      | IgM=95.7%; IgG= 91.8% | IgM=97.3%; IgG=96.4% | 6   | Medium |
| 4  | 5   | Vince (51)        | Croatia             |                                               | EU/EEA     | No  | National   | Pre-print         | 20 May - 31 Jul                  | Other    | Convenience  | Football players                            | 305              | 20%                                                  | ELISA               | EUROIMMUN; N;                                            | IgA; IgG      | Not reported          | Not reported         | 2   | High   |
| 6  | 92  | Anna (135)        | France              | Ile-de-France; Paris; Saint-Cloud; Orsay      | EU/EEA     | No  | City/local | Published         | 28 Apr - 31 Jul                  | Other    | Convenience  | Employees - voluntary                       | 1847             | 11.6%                                                | LuLISA; MN          | In-house; In-house;                                      | IgG           | Not reported          | 98%                  | 6   | Medium |
| 9  | 93  | Fontanet (52)     | France              | Oise                                          | EU/EEA     | No  | City/local | Published^        | 30 Mar – 4Apr; 28 Mar – 30 Apr   | Other    | Convenience  | HH/C samples; High school; Primary school   | 664<br>1340      | 25%; 10%                                             | ELISA; S-flow LIPS; | In-house; In-house; In-house                             | IgG           | 99.4%                 | >99%                 | 8   | Low    |
| 11 | 94  | Roederer (16)     | France              | Paris                                         | EU/EEA     | No  | City/local | Published^        | 23 Jun - 2 Jul                   | Other    | Convenience  | Persons experiencing homelessness           | 818              | 52%                                                  | LuLISA* ; MN        | In-house                                                 | IgG           | Not reported          | 97-100%              | 9   | Low    |
| 13 | 95  | Krähling (136)    | Germany             | Frankfurt am Main                             | EU/EEA     | No  | City/local | Pre-print         | 6-14 Apr                         | Other    | Convenience  | Employees                                   | 998              | 2.90%                                                | ELISA               | In-house;                                                | IgG           | 87.2-100%             | 99.2%                | 4   | Medium |
| 14 | 96  | Mack (60)         | Germany             |                                               | EU/EEA     | No  | National   | Published         | May; June                        | Other    | Convenience  | Professional football teams                 | 1184             | May: 1.99% (1.33–2.97); June: 2.09% (1.37–3.17);     | ELISA; CLIA         | EUROIMMUN; Roche Diagnostics                             | IgG           | Not reported          | Not reported         | 3   | High   |
| 16 | 97  | Ceban (137)       | Republic of Moldova |                                               | non EU/EEA | Yes | National   | Not yet published | 17 Nov 2020 – 15 Jan 2021        | Other    | Random       | Hospital visitors                           | 5656             | 48.4%                                                | ELISA               | Beijing Wantai Biological Pharmacy Enterprise Virell     | Total Ab      | Not reported          | Not reported         | N/A | N/A    |
| 19 | 98  | Gujski (138)      | Poland              | Mazowieckie Province                          | EU/EEA     | No  | Regional   | Published         | 22 Jun - 8 Jul                   | Other    | Random       | Employees                                   | 5082             | 4.30%                                                | ELISA               |                                                          | IgA; IgM; IgG | 65% - 97%             | 82% - 96%            | 3   | High   |
| 20 | 99  | Pérez-García (55) | Spain               | Madrid                                        | EU/EEA     | No  | City/local | Published         | 5 Mar - 30 May                   | Other    | Convenience  | Employees                                   | 2963             | 22.40%                                               | LFA                 | AllTest Biotech                                          | IgM; IgG      | 88%                   | 100%                 | 4   | Medium |
| 22 | 100 | Ulyte (73)        | Switzerland         | Canton of Zurich                              | non-EU/EEA | No  | Regional   | Published^        | 16 Jun - 9 Jul; 26 Oct - 19 Nov  | Other    | Random       | School children                             | 5155; 2603; 2552 | 7.8% (6.2% to 9.5%); 2.4% (1.4-3.5); 4.5% (3.2-6.0); | ELISA               | In-house                                                 | IgA; IgM; IgG | 93.3-94.3%            | 99-99.6%             | 6   | Medium |
| 24 | 101 | Roarty (139)      | United Kingdom      | Belfast; Cardiff; Glasgow; London; Manchester | non-EU/EEA | No  | National   | Published         | 26 Jun - 15 Aug                  | Other    | Convenience  | Children of employees                       | 849              | 7.66% (6.05-9.64)                                    | CLIA; CLIA          | Elecsys Roche; DiaSorin Liaison                          | IgG           | 84%; 64%              | 100%; 98%            | 4   | Medium |
| 28 | 102 | Waterfield (140)  | United Kingdom      | Belfast; London; Glasgow; Manchester; Cardiff | non-EU/EEA | No  | National   | Published         | 16 Apr - 3 Jul                   | Other    | Convenience  | Children of employees                       | 992              | 6.9% (5.4 - 8.6)                                     | CLIA; CMIA          | Abbott Laboratories; Roche Diagnostics; DiaSorin Liaison | IgG           | 64-94%                | 98-100%              | 4   | Medium |
| 32 | 103 | Armann (59)       | Germany             | Eastern Saxony                                | EU/EEA     | No  | Regional   | Pre-print         | 25 May - 30 Jun; 15 Sept- 13 Oct | Other    | Convenience  | Teachers and students                       | 1779             | 0.6%; 0.6%                                           | ELISA; CLIA; CMIA   | EUROIMMUN; Diasorin Liaison; Abbott Laboratories         | IgG           | 97.6%                 | 99.3%                | 7   | Low    |
| 35 | 104 | Reisinger (141)   | Germany             | Rostock                                       | EU/EEA     | No  | City/local | Published         | 22-29 Apr                        | Other    | Convenience  | Children and mothers                        | 401              | 2.90%                                                | ELISA               | EUROIMMUN                                                | IgA; IgG      | Not reported          | Not reported         | 3   | High   |
| 36 | 105 | Tsitsilonis (42)  | Greece              | Athens                                        | EU/EEA     | No  | City/local | Published         | 15 Jun - 15 Jul                  | Other    | Convenience  | Employees and students                      | 2500             | 0.93% (0.27, 2.09) §                                 | CLIA                | Roche Diagnostics                                        | Total Abs     | 100%                  | 99.81%               | 5   | Medium |
| 38 | 106 | Lastrucci (142)   | Italy               | Prato                                         | EU/EEA     | No  | Regional   | Published         | 1 May - 31 May                   | Multiple | Random       | Work-from-home; Support service             | 1828             | 1% (0.3-2.0); 1.4% (0.7-2.2)                         | LFA                 | Hangzhou Laihe Biotech                                   | IgM; IgG      | Not reported          | Not reported         | 2   | High   |
| 39 | 107 | Soriano (143)     | Spain               | Madrid                                        | EU/EEA     | Yes | City/local | Published         | 27 Apr - 17 May                  | Multiple | Convenience  | University staff, family members, community | 674              | 13.8%                                                | LFA                 | PCL Inc                                                  | IgM; IgG      | Not reported          | Not reported         | 3   | High   |

| Study ID | Country         | Region         | EU/EEA           | Initial Report | Study Type | Publication Status | Time Period            | Study Design              | Recruitment | Study Population | Sample Size                                                      | Prevalence                                                                                                                             | Assay                                          | Setting                     | Antibody   | Sensitivity                                                                                                                                         | Specificity                                                                                                                                              | Number of Studies | Quality |        |
|----------|-----------------|----------------|------------------|----------------|------------|--------------------|------------------------|---------------------------|-------------|------------------|------------------------------------------------------------------|----------------------------------------------------------------------------------------------------------------------------------------|------------------------------------------------|-----------------------------|------------|-----------------------------------------------------------------------------------------------------------------------------------------------------|----------------------------------------------------------------------------------------------------------------------------------------------------------|-------------------|---------|--------|
| 108      | Montenegro (31) | Spain          | Barcelona        | EU/EEA         | No         | City/local         | Published              | 21-24 Apr; 29 Apr - 6 May | Multiple    | Random           | 311; 634                                                         | 5.47% (3.44-8.58); 38.49% (34.78%-42.33%)                                                                                              | LFA; LFA; LFA                                  | Livzon; Lysine; Sure Screen | IgM; IgG   | Livzon=91.2%; Lysine=98.6%; SureScreen=91%                                                                                                          | 100%                                                                                                                                                     | Not reported      | 9       | Low    |
| 109      | Emmenegger (27) | Switzerland    | Canton of Zurich | non-EU/EEA     | Yes        | Regional           | Pre-print              | Mar - Jul                 | Multiple    | Convenience      | Total: 33932; Blood donor cohort: 9,102; Patient cohort: 24,830; | BDS cohort <sup>†</sup> : April: 1.2%; May: 1.6%; July: 0.7%; Patient cohort <sup>†</sup> : March: 0.3%; April: 1.4%; May -July: 0.9%; | Tripartite Automated Blood Immunoassay (TRABI) | In house                    | IgG        | 100%                                                                                                                                                | 100%                                                                                                                                                     | 5                 | Medium  |        |
| 110      | Dopico (26)     | Sweden         | Stockholm        | EU/EEA         | No         | City/local         | Published <sup>^</sup> | 4 Mar - 11 Dec            | Multiple    | Convenience      | 2600, 2500                                                       | 14.8% (12.2-18.0)                                                                                                                      | ELISA                                          | In house                    | IgG        | Spike 3SD:100% (95% CI [97.5-100.0]); Spike 6SD:100% (95% CI [97.5-100.0]); RBD 3SD:100% (95% CI [97.5-100.0]); RBD 6SD:98.0% (95% CI [94.2-99.3]); | Spike 3SD: 99.0% (95% CI [98.6-99.0]); Spike 6SD: 99.9% (95% CI [99.6-100.0]); RBD 3SD: 99.0% (95% CI [98.4-99.4]); RBD 6SD: 99.9% (95% CI [99.6-100.0]) | 5                 | Medium  |        |
| 111      | Davis (144)     | United Kingdom | London           | non-EU/EEA     | No         | City/local         | Pre-print              | Jun                       | Other       | Convenience      | University staff and students                                    | 1882                                                                                                                                   | 6.6% (5.6-7.8)                                 | LFA                         | SureScreen | IgM; IgG                                                                                                                                            | 89%                                                                                                                                                      | 100%              | 4       | Medium |

\* LuLISA: Luciferase Linked Immunosorbent Assay  
<sup>^</sup> Initially reported to WHO EURO and ECDC in 2020 or in pre-print form and since published

For peer review only

16  
17  
18  
19  
20  
21  
22  
23  
24  
25  
26  
27  
28  
29  
30  
31  
32  
33  
34  
35  
36  
37  
38  
39  
40  
41  
42  
43  
44  
45  
46  
47



1  
2  
3 In total, 72 (65%) of the studies provided representative estimates from the general population, of which  
4 sample frames included 45 (41%) studies of household or community samples, 13 (12%) residual sera, 13  
5 (12%) patients seeking healthcare for non-COVID-19 related issues, seven (6%) pregnant or parturient  
6 women. Sixteen (14%) studies sampled blood donors as a proxy for the general population while 23 (21%)  
7 sampled other or multiple populations. Studies were conducted at differing geographical levels within a  
8 country, including at the national level (n=33; 30%), regional level (n=27; 24%) and city or local level  
9 (n=50; 44%). One study reported both national and regional estimates (13).  
10  
11  
12  
13  
14  
15  
16  
17  
18  
19

20 Over half of the studies used one serological assay (74; 67%) while 34 (31%) used at least two different  
21 assays. In 82 studies (74%), commercial assays from various sources were used, 20 (18%) studies used an  
22 in-house assay only and six studies (5%) used both a commercial and in-house developed assay. The test  
23 method was not reported in two studies. An Enzyme-linked Immunosorbent assay (ELISA) was the method  
24 most commonly employed (n=55, 50%), followed by Chemiluminescent immunoassay (CLIA) or  
25 Chemiluminescence Microparticle Immunoassay (CMIA) (n=42, 38%) and lateral flow immunoassays  
26 (LFAs) (n=25, 23%). Seventeen studies (15%) used LFAs exclusively. Ten studies (9%) employed in-  
27 house microneutralization assays to assess the neutralizing ability of SARS-CoV-2 antibodies.  
28  
29  
30  
31  
32  
33  
34  
35  
36  
37  
38

39 Of 90 studies that used a commercial assay, 33 studies (37%) reported the use of tests with acceptable  
40 sensitivity and specificity. Of those that independently validated assay performance (n=41, 46%), 14 (34%)  
41 reported acceptable sensitivity and specificity, while 27 (66%) did not meet these thresholds. Of the 20  
42 studies that used an in-house assay, nine (45%) reported an acceptable test performance, four (20%)  
43 performed below these thresholds and seven (35%) did not report on test performance. The majority of  
44 studies (n=83, 75%) did not report adjustment for test sensitivity or specificity in their analysis.  
45  
46  
47  
48  
49  
50  
51  
52  
53  
54  
55  
56  
57  
58  
59  
60

**Table 1: Study characteristics**

| Characteristics                            | Number of studies | %   |
|--------------------------------------------|-------------------|-----|
| <b>Total</b>                               | 111               | 100 |
| <b>Study characteristics</b>               |                   |     |
| <b>Country</b>                             |                   |     |
| WHO European Region (EU/EEA)               | 82                | 74  |
| WHO European Region (outside of EU/EEA)    | 29                | 26  |
| <b>WHO UNITY alignment</b>                 |                   |     |
| Unity-aligned                              | 56                | 50  |
| Not Unity-aligned                          | 55                | 50  |
| <b>Publication type</b>                    |                   |     |
| Peer-reviewed article                      | 77                | 69  |
| Pre-print                                  | 19                | 17  |
| Institutional report                       | 9                 | 8   |
| Not yet published                          | 6                 | 5   |
| <b>Geographical level</b>                  |                   |     |
| National                                   | 33                | 30  |
| Regional                                   | 27                | 24  |
| City/Local                                 | 50                | 44  |
| Multiple                                   | 1                 | 1   |
| <b>Sampling strategy</b>                   |                   |     |
| Convenience                                | 69                | 62  |
| Random                                     | 41                | 37  |
| Not reported                               | 1                 | 1   |
| <b>Population type</b>                     |                   |     |
| Household/Community                        | 45                | 41  |
| Residual sera                              | 13                | 12  |
| Blood donors                               | 16                | 14  |
| Patients seeking healthcare (non COVID-19) | 13                | 12  |
| Pregnant or parturient women               | 7                 | 6   |
| Other/multiple                             | 23                | 21  |
| <b>Quality assessment</b>                  |                   |     |
| Low risk of bias                           | 41                | 37  |
| Medium risk of bias                        | 40                | 36  |
| High risk of bias                          | 24                | 22  |
| N/A                                        | 6                 | 5   |
| <b>Sample size</b>                         |                   |     |
| <1000                                      | 45                | 41  |
| >=1000                                     | 66                | 59  |
| <b>Laboratory characteristics</b>          |                   |     |
| <b>Serological method</b>                  |                   |     |
| ELISA                                      | 55                | 50  |
| CMIA/CLIA                                  | 42                | 38  |
| LFA                                        | 25                | 23  |
| MN                                         | 10                | 9   |
| Other                                      | 8                 | 7   |
| Not reported                               | 2                 | 1   |
| <b>Type of assay</b>                       |                   |     |
| Commercial                                 | 90                | 81  |
| In-house                                   | 26                | 23  |
| Not reported                               | 2                 | 1   |

\*ELISA – Enzyme linked immunoassay; CMIA/CLIA - Chemiluminescence Microparticle Immunoassay/ Chemiluminescence Microparticle Immunoassay; LFA – Lateral flow immunoassay; MN – Microneutralization assay

1  
2  
3 Based on our quality scoring system (Supplementary Table S2), 81 studies (73%) were of high or medium  
4 quality reflecting a low or medium risk of bias, respectively (medium quality: n=40, 36%; high quality  
5 n=41, 37%). A total of 24 studies (22%) were determined to be at high risk of bias, largely due to non-  
6 random sampling frame, weak representativeness of the general population or lack of adjustment for  
7 sampling bias or test performance.  
8  
9  
10  
11  
12

13  
14  
15 Seroprevalence estimates (n=88) from national studies ranged from 0% (CI: 0.0-0.7) in Finland in May (14)  
16 to 51.3% in Georgia in December (15) (median 2.2% (IQR 0.7 – 5.2%); n=124) (Figure 3a), while  
17 seroprevalence estimates from studies spanning regions, cities or towns (n=101) ranged from 0% (CI 0.0-  
18 0.5%) in Czech Republic in August 2020 (15) to 52% in a Médecins Sans Frontières centre in Paris, France  
19 during an outbreak with widespread community transmission in June 2020 (16) (median 5.8% (IQR 2.3-  
20 12%); n=101) (Figure 3b).  
21  
22  
23  
24  
25  
26  
27  
28  
29

30  
31 A total of 45 studies provided seroprevalence estimates (n=105) from community or household samples  
32 and 39 studies (87%) were found to be of high or medium quality. Seroprevalence estimates ranged from  
33 0% (CI: 0-0.7%) in Finland in May and to 51.3% in December 2020 in Georgia (15) (median 2.6% (IQR  
34 0.5-10%) n=105) (Supplementary Figure S1).  
35  
36  
37  
38  
39  
40

41 Thirteen studies screened residual clinical samples (29-42) between February and November 2020, of  
42 which nine (70%) were of high or medium quality. Seroprevalence estimates (n=34) in this population  
43 varied across countries ranging from 0% (CI 0-0.23) in Greece in March to 18.7% (CI 16.7-23.3%) in  
44 Sweden in June (median 4.5% (IQR 3.5-5.9%); n=34) (Supplementary Figure S2a).  
45  
46  
47  
48  
49  
50

51 Eighteen studies (17%) utilized blood donors as a proxy for the general population between February and  
52 December 2020, of which 16 were of high or medium quality. Seroprevalence estimates (n=42) in blood  
53 donors varied across countries, ranging from 0.4% in Germany between March and June (17) to 30% in  
54  
55  
56  
57  
58  
59  
60

1  
2  
3 Tensta (Stockholm) following a period of high incidence in June (18) (median 5.8% (IQR 2.1-5.7%) n=42)  
4  
5 (Supplementary Figure S2b).  
6  
7  
8

9  
10 Eight studies investigated the seroprevalence of SARS-CoV-2 in pregnant or parturient women, reporting  
11 estimates ranging from 2.6% (CI 1.7-4%) and 14.3% between March and June 2020 (median 6.9% (IQR  
12 5.1-12%); n=8) (19-25) (Supplementary Figure S2c). One study provided combined estimates of blood  
13 donors and pregnant women of 14.8% in Sweden between March and December (26)  
14  
15  
16  
17

18  
19  
20 Fourteen studies provided 16 estimates from individuals seeking healthcare for non-COVID-19 related  
21 reasons and seven (50%) of these were medium or high quality. Estimates ranged from 0.3% in Zurich,  
22 Switzerland in March (27) to 36.2% in London in April (28) (median 4.1% (IQR 2.1-8.8%); n=16) from  
23 March to August 2020. The highest seroprevalence estimates (>10%) in this group were observed in three  
24 patient groups investigated following local widespread community transmission, oncology patients (31%)  
25 in Bergamo, Italy in April 2020 (29), oncology patients (31.4%) in Madrid between May and June 2020  
26 (30) and haemodialysis patients (36.2%) in London in April and May 2020 (28) and patients (38.5%) in  
27 Barcelona, Spain in April (31) (Supplementary Figure S2d).  
28  
29  
30  
31  
32  
33  
34  
35  
36  
37  
38

39 Forty-four (41%) studies reported seroprevalence estimates stratified by age. Seroprevalence estimates  
40 varied considerably across age groups and estimates tended to be lower in children (<18 years) (32-34)  
41 and older age groups (>60 years) (32, 35-40). Whilst a number of studies reported a high seroprevalence  
42 in older age groups (>55 years) (36, 37, 41-46), some studies also reported a higher seroprevalence in  
43 younger age groups (<40 years) (33, 46-48). In studies that reported seroprevalence estimates by sex,  
44 similar seroprevalence results were observed between females and males with the exception of a study in  
45 Italy (45), Russian Federation (49) and Kyrgyzstan (34) which each found a higher seroprevalence in  
46 females.  
47  
48  
49  
50  
51  
52  
53  
54  
55  
56  
57  
58  
59  
60

1  
2  
3 A number of studies provided seroprevalence estimates prior to, or at the early stages of the epidemic in  
4 the country (Supplementary Figure S3). Of these, overall study estimates were largely below 10%, however  
5 higher seroprevalence was noted in a number of population-specific, regional or local studies (29, 36, 43,  
6 50-54), with suggestion of earlier undetected transmission in some countries (24, 26, 34, 55). A total of  
7 16 studies reported seroprevalence estimates spanning multiple timepoints or stages of the epidemic (14,  
8 15, 27, 31, 32, 47, 56-73). In a serial cross-sectional study in France (61), residual blood sampled before,  
9 during and after a national lockdown showed a seroprevalence of 0.41%, 4.14%, and 4.93%, respectively.  
10 In Georgia, in a community sample, an increase in seroprevalence from 0-1.3% in August 2020 to 35-51.3%  
11 in the same regions in December 2020 was noted (15). A seroprevalence study in blood donors conducted  
12 in Milan between February and April 2020 during a period of intense transmission found an increase in  
13 seroprevalence from 2.7% (95% 0.3-6.0%) to 5.2% (95% 2.4-9.0) , with an adjusted rate of increase in  
14 antibodies (IgG) of  $2.7 \pm 1.3\%$  per week as social distancing measures were gradually implemented (58).  
15 While in Finland, weekly testing of blood donors from April 2020 onwards showed a consistently low  
16 seroprevalence in the general population over time (0.28% (0.05–1.55) in early April 2020 to 0% (0–12.87)  
17 in late December 2020 (67).

18  
19  
20  
21  
22  
23  
24  
25  
26  
27  
28  
29  
30  
31  
32  
33  
34  
35  
36  
37 The relationship between seroprevalence and reported SARS-CoV-2 laboratory confirmed cumulative case  
38 and deaths incidence was also explored. While seroprevalence from national studies correlated moderately  
39 with cumulative incidence (Spearman's rank correlation coefficient, 0.52) (Figure 4a), a stronger correlation  
40 was observed between seroprevalence estimates and cumulative SARS-CoV-2 deaths (Spearman's rank  
41 correlation coefficient, 0.754) (Figure 4b).

## 42 43 44 45 46 47 48 **DISCUSSION**

49 In this study we report the results of 111 studies, including 224 seroprevalence estimates from 26 countries  
50 in the WHO European Region undertaken until December 2020, prior to the implementation of national  
51 COVID-19 vaccine campaigns. A significant heterogeneity in implementation was noted across the studies,  
52 with a bias towards studies in high-income countries in Western Europe.

1  
2  
3 Overall, population-wide seroprevalence estimates were low (below 10%) across the Region early in 2020  
4 before the onset of widespread community transmission and remained low across the Region throughout  
5 2020, despite circulation of SARS-CoV-2 over this period. Higher estimates were observed at a regional or  
6 local level in populations that had experienced intense community transmission (up to 52%). Furthermore,  
7 a positive correlation between seroprevalence estimates and national cumulative incidence was observed,  
8 with a stronger correlation between seroprevalence and cumulative mortality.  
9  
10  
11  
12  
13  
14  
15  
16  
17

18 The wide variation in seroprevalence estimates across the region are likely to reflect many factors including  
19 the differences in the population studied, local stage of the epidemic and the public health and social  
20 measures implemented in response to the epidemic at that time. The general low seroprevalence both at the  
21 start of the pandemic and at the end of 2020 is in line with a number of global systematic review conducted  
22 to date (74-76) and together indicate that the majority of the proportion of the population in the WHO  
23 European Region were and remain susceptible to infection one year after the identification of SARS-CoV-2  
24 and prior to the start of national vaccination campaigns. In a global systematic review, Chen et al. estimated  
25 a seroprevalence of 4.2% (2.7-5.8) across the European Region until August 2020 (76) while Rostami et al.  
26 estimated a pooled prevalence of 3.17% (1.96-4.38), 4.41 % (2.20-6.61), 5.27% (3.97-6.57) in Western,  
27 Southern and Northern Europe, respectively (75). In the same period, Bobrovitz et al. reported a pooled  
28 estimate of 1.6% (1.1-5.2%) seroprevalence in studies conducted across Central Europe, Eastern Europe  
29 and Central Asia (77) and 12.2% (4.5-25.4%) from population-wide studies conducted until December 2020  
30 (74).  
31  
32  
33  
34  
35  
36  
37  
38  
39  
40  
41  
42  
43  
44  
45  
46

47 A number of studies reported low seroprevalence in younger and older age groups, a finding observed in  
48 other systematic reviews (74, 76, 78). Such findings have important implications, as groups such as the  
49 elderly are at higher risk of severe outcome following infection – and lack of cross-protective immunity  
50 indicates that all age-groups will anticipate to see high infection attack rates without implementation of  
51  
52  
53  
54  
55  
56  
57  
58  
59  
60

1  
2  
3 measures such as vaccination of priority groups, together with strengthening of public health and social  
4 measures to reduce SARS-CoV-2 transmission.  
5  
6  
7

8  
9 When reviewed alongside case notification data, seroprevalence estimates can provide greater insight into  
10 the local evolution of the pandemic. In this review, a positive correlation between seroprevalence estimates  
11 and national cumulative incidence in a number of countries was observed, suggesting that seroprevalence  
12 is a reflection of the duration and intensity of community transmission. It should be noted however that  
13 during the initial peak of infections in Europe in the spring of 2020, testing in many countries was not yet  
14 optimal and case notification data at this time are unlikely to provide a robust proxy for incidence in many  
15 instances. In line with this, several studies found seroprevalence estimates to be higher than the  
16 corresponding cumulative incidence of SARS-CoV-2 infections, suggesting a substantial under-  
17 ascertainment of infection through notifications, due to a number of factors including the asymptomatic or  
18 mild nature of disease, healthcare seeking behaviour, lack of testing capacity and testing and reporting  
19 strategies. Indeed, we also found a stronger association between seroprevalence and cumulative case  
20 mortality than cumulative case incidence, providing further evidence to support the suggestion of case  
21 under-ascertainment, as laboratory confirmed mortality surveillance for COVID-19 is likely to be more  
22 comprehensive.  
23  
24  
25  
26  
27  
28  
29  
30  
31  
32  
33  
34  
35  
36  
37  
38  
39  
40

41 The varying quality of studies in this review reflects the challenge of conducting seroepidemiological  
42 studies of high quality. Indeed, this review found that only 50% of all studies undertaken in the WHO  
43 European region in 2020 were aligned with the WHO Unity study initiative. Few of the national (n=5; 15%)  
44 or regional (n=2; 7%) studies were determined to be of high risk of bias, while 17 (34%) of studies  
45 conducted at a local level (cities or towns) were graded as such. This variation may be explained by the  
46 level of resources and epidemiological support available to studies conducted at the regional or national  
47 level.  
48  
49  
50  
51  
52  
53  
54  
55  
56  
57  
58  
59  
60

1  
2  
3 The majority of studies identified in this review utilised convenience rather than random sampling, which  
4 may have reduced the true representativeness of the estimates derived, though such convenience sampling  
5 is likely to provide a good estimate of population exposure for widely circulating viral infections. Many  
6 studies also included individuals that were not fully representative of the population under study, which  
7 may have introduced bias. For example, this review included studies that explored seroprevalence in the  
8 general population by utilising various proxy populations such as blood donors and residual blood. Blood  
9 donors are known to differ from the general population in that they are often a young, healthy adult  
10 population selected on the basis of lack of recent infection (79) and seroprevalence may therefore be over  
11 or underestimated in this group. Residual sera, on the other hand, derives from individuals who have sought  
12 health care and may therefore have pre-existing comorbidities or be at higher risk of SARS-CoV-2  
13 infection. However, we found that seroprevalence estimates for these distinct populations are in good  
14 agreement with the general population.  
15  
16  
17  
18  
19  
20  
21  
22  
23  
24  
25  
26  
27  
28  
29

30 We also found that there was a high degree of heterogeneity across serological assays used. The majority  
31 of studies used commercial tests of varying sensitivity and specificity to detect SARS-CoV-2 targeted  
32 antibodies, although some of these assays have now been shown to have excellent performance (80, 81).  
33 However, under half of studies performed independent validation of these kits with internal controls and  
34 serum panels and only 25% accounted for the sensitivity and specificity of the tests in their statistical  
35 analyses. As SARS-CoV-2 serological tests have been found to have variable test performance (80, 81),  
36 independent validation at local level in combination with use of an WHO International Standard and  
37 Reference Panel for anti-SARS-CoV-2 antibody has been widely promoted as part of the Solidarity II  
38 initiative (82, 83). Other options include the Joint Research Centre (84) reference materials for the quality  
39 control of SARS-CoV-2 antibody tests. Use of these materials will allow for the potential correction for  
40 sensitivity and specificity during the statistical analysis, would allow for more robust estimates and greater  
41 comparability among countries in the region.  
42  
43  
44  
45  
46  
47  
48  
49  
50  
51  
52  
53  
54  
55  
56  
57  
58  
59  
60



1  
2  
3 Overall, the findings of this review highlight the need for international collaboration to standardise  
4 approaches and support countries in conducting robust comparable studies. WHO, in collaboration with  
5 technical partners, has developed the Unity studies (2)(90), a global seroepidemiology standardization  
6 initiative for COVID-19, which aims to increase quality evidence-based knowledge in country and regions  
7 for action through the availability of standardized seroepidemiology investigation protocols and antibody  
8 assays. A primary aim of this global initiative is the provision of direct support to countries to develop  
9 country specific protocols, with particular attention provided to low- and middle- income countries  
10 (LMICs), and to support aggregation, comparison and analysis of robust Unity-aligned studies through  
11 strong coordination between WHO Country offices, Regional offices and Headquarters. A large proportion  
12 of the studies identified in this systematic review were conducted in Western European countries, with a  
13 relative scarcity of seroprevalence studies from other countries by the end of 2020, an observation noted in  
14 other systematic reviews (74-76, 78). This highlights the urgent need for enhanced capacity, the provision  
15 of additional support to LMICs and the sharing of information to address the gap in knowledge and tackle  
16 research inequity. To counteract the skewedness in the WHO European Region, the WHO Unity protocols  
17 have been widely promoted by WHO and ECDC and technical support has been provided to tailor the  
18 protocols to local contexts, together with laboratory and financial support to LMICs. In addition, WHO  
19 and ECDC jointly established a network of approximately 300 public health professionals to facilitate  
20 discussions in related to SARS-CoV-2 seroprevalence, promote timely sharing of results and knowledge  
21 and further build capacity in the WHO European Region.  
22  
23  
24  
25  
26  
27  
28  
29  
30  
31  
32  
33  
34  
35  
36  
37  
38  
39  
40  
41  
42  
43  
44

45 This systematic review is the first in the WHO European region to describe the seroprevalence of SARS-  
46 CoV-2 in the first year of the pandemic, prior to the widespread implementation of vaccine programs  
47 nationally. In addition, with the inclusion of as yet unpublished data from LMICs, this review contributes  
48 to research equity across Member States income levels and provides a more representative overview of the  
49 situation in the WHO European Region than would published studies alone.  
50  
51  
52  
53  
54  
55  
56  
57  
58  
59  
60

1  
2  
3 This review has some limitations. Firstly, there was significant heterogeneity among the studies, including  
4 sampling frame, population and stage of epidemic at time of serosurvey, which makes comparability across  
5 studies difficult. Due to such heterogeneity, we opted to not provide one pooled estimate nor conduct a  
6 meta-analysis, as interpretation would be difficult and may not accurately reflect the picture in the WHO  
7 European Region. Secondly, while population-based serological surveys can provide a more accurate  
8 estimation of the overall rates of SARS-CoV-2 infection within a population, this approach does not  
9 consider antibody waning, which cannot be easily accounted for as antibody levels vary depending on  
10 disease severity (85) and longevity is expected to vary greatly across SARS-CoV-2 infected individuals  
11 (86). Finally, due to the rapid accumulation of data related to SARS-CoV-2 seroepidemiology and the  
12 advent of the ‘preprint era’, not all included studies have been published and may therefore be subject to  
13 change upon peer review.  
14  
15  
16  
17  
18  
19  
20  
21  
22  
23  
24  
25

## 26 27 28 Conclusion

29 As SARS-CoV-2 continues to circulate widely, understanding the population seropositivity remains critical  
30 for policymakers and public health officials to make informed decisions on optimal public health  
31 interventions, such as lifting or tightening of restrictions (9, 87). We found evidence that SARS-CoV-2  
32 antibody seroprevalence across the WHO European Region was low prior to widespread circulation and  
33 remained low in the general population during 2020. This suggests that much of the population remained  
34 susceptible to infection prior to the implementation of national COVID-19 vaccine campaigns from early  
35 2021 onwards. We also found variation in seroprevalence estimates between and within countries during  
36 2020 with evidence of increased prevalence in areas following high levels of transmission and some  
37 association with incidence and mortality trends over time. It is clear that antibody-mediated ‘herd  
38 immunity’ through natural infection is not attainable in most countries and COVID-19 vaccines should  
39 continue to be distributed widely and equitably to protect priority groups and the wider population. Given  
40 the issue of antibody waning, all efforts must be also directed towards well-informed and evidence-based  
41 implementation and maintenance of non-pharmaceutical interventions at a local and national level to stem  
42  
43  
44  
45  
46  
47  
48  
49  
50  
51  
52  
53  
54  
55  
56  
57  
58  
59  
60

1  
2  
3  
4  
5  
6  
7  
8  
9  
10  
11  
12  
13  
14  
15  
16  
17  
18  
19  
20  
21  
22  
23  
24  
25  
26  
27  
28  
29  
30  
31  
32  
33  
34  
35  
36  
37  
38  
39  
40  
41  
42  
43  
44  
45  
46  
47  
48  
49  
50  
51  
52  
53  
54  
55  
56  
57  
58  
59  
60

any future waves of the pandemic. As vaccine programs continue to be implemented more widely, seroprevalence studies will be instrumental to evaluate both natural and vaccine derived immunity overtime to guide public health actions and decision making.

For peer review only

## Data sharing

The unpublished data supporting the findings of this study are available on the open source Zenodo repository <https://zenodo.org/communities/unity-sero-2021?page=1&size=20>.

## Supplementary material

Supplementary material file is attached

## Registration and protocol

Not registered. A protocol was not prepared

## Declaration of interests

No competing interests

## Funding

This work was supported by WHO through funding from the WHO Solidarity Response Fund and the German Federal Ministry of Health COVID-19 Research and Development.

## Ethics statement

This systematic review of study data did not require ethical approval. This study does not involve human participants nor animal subjects.

## Authors' Contributions

Conceptualisation: AV, ED, GF, RP, MK, PP, AN, MV, IB, LS, EB; Data curation: AV, GF, ED, MK, DL; Formal analysis: AV, GF, ED, MK; Investigation: AV, GF, ED, MK, AN, MV; Methodology: AV, GF, ED, MK, AN, MV, RP, PP, EB; Supervision: AV, GF, ED, MK, RP, PP; Writing – original draft: AV, ED, GF, RP, MK, PP, IB, LS, AN, MV, EB; Writing – review & editing: All authors

## Acknowledgements

The authors alone are responsible for the views expressed in this publication and they do not necessarily represent the decisions, policy, or views of WHO or ECDC. The authors would like to acknowledge the Principle Investigators of Unity-aligned studies who have kindly shared their unpublished data: Bosnia and Herzegovina: Dejan Bokonjić (University of East Sarajevo Faculty of Medicine Foča, Bosnia and Herzegovina (Republic of Srpska)), Elma Catovic Baralija (Institute for Transfusion Medicine of the Federation of Bosnia and Herzegovina, Sarajevo, Bosnia and Herzegovina), Sanjin Musa (Institute for Public Health of the Federation of Bosnia and Herzegovina, Sarajevo, Bosnia and Herzegovina (Federation of Bosnia and Herzegovina)), Ranko Škrbić (Medical Faculty in Banja Luka, Bosnia and Herzegovina (Republic of Srpska)); Bulgaria: Angel Kunchev

(Ministry of Health of the Republic of Bulgaria), Savina Stoitsova (National Center of Infectious and Parasitic Diseases); Georgia: Olga Tarkhan-Mouravi (National Center for Disease Control and Public Health Georgia, Head of Vaccine-Preventable and Respiratory Diseases Division, Georgia); Kyrgyzstan: Tatyana Kuchuk (Republican Scientific and Practical Center for Laboratory Diagnostic Quality Control of infectious diseases, Ministry of Health of the Kyrgyz Republic, Kyrgyzstan), Nurmatov Zuridin (Republican Scientific and Practical Center for Control of Viral Infections, Ministry of Health of the Kyrgyz Republic, Kyrgyzstan); Republic of Moldova: Alexei Ceban (National Agency for Public Health, Chişinău, Republic of Moldova). We would also like to thank Céline Roman (WHO EURO), Jeffrey Pires (WHO EURO), Tjede Funk (ECDC) and Tommi Karki (ECDC) for data collection, analysis and visualization; Tomas Allen and the WHO HQ library team for developing the search strategy; SeroTracker (Mairead Whelan, Zihan Li, Niklas Bobrovitz, Harriet Ware and Rahul K Arora) and WHO HQ colleagues (Hannah Lewis and Brianna Cheng); and all ECDC, WHO Headquarters, Regional and Country Office colleagues who contributed to this work. The authors are alone responsible for the views expressed in this publication and they do not necessarily represent the decisions or policies of the WHO or ECDC.

## References

1. World Health Organization; 2021. WHO Coronavirus Disease (COVID-19) Dashboard. Available from: <https://covid19.who.int/>.
2. Bergeri I, Lewis HC, Subissi L, Nardone A, Valenciano M, Cheng B, et al. Early epidemiological investigations: World Health Organization UNITY protocols provide a standardized and timely international investigation framework during the COVID-19 pandemic. *Influenza Other Respir Viruses*. 2021;1- 7. .
3. Cheng MP, Papenburg J, Desjardins M, Kanjilal S, Quach C, Libman M, et al. Diagnostic Testing for Severe Acute Respiratory Syndrome-Related Coronavirus 2: A Narrative Review. *Ann Intern Med*. 2020;172(11):726-34.
4. Byambasuren O, Cardona M, Bell K, Clark J, McLaws M-L, Glasziou P. Estimating the extent of asymptomatic COVID-19 and its potential for community transmission: Systematic review and meta-analysis. *Official Journal of the Association of Medical Microbiology and Infectious Disease Canada*. 2020;5(4):223-34.
5. Koh WC, Naing L, Chaw L, Rosledzana MA, Alikhan MF, Jamaludin SA, et al. What do we know about SARS-CoV-2 transmission? A systematic review and meta-analysis of the secondary attack rate and associated risk factors. *PLOS ONE*. 2020;15(10):e0240205.
6. Buitrago-Garcia D, Egli-Gany D, Counotte MJ, Hossmann S, Imeri H, Ipekci AM, et al. Occurrence and transmission potential of asymptomatic and presymptomatic SARS-CoV-2 infections: A living systematic review and meta-analysis. *PLoS Med*. 2020;17(9):e1003346.
7. Tanne JH. Covid-19: US cases are greatly underestimated, seroprevalence studies suggest. *BMJ*. 2020;370:m2988.
8. Wajnberg A, Mansour M, Leven E, Bouvier NM, Patel G, Firpo-Betancourt A, et al. Humoral response and PCR positivity in patients with COVID-19 in the New York City region, USA: an observational study. *The Lancet Microbe*. 2020;1(7):e283-e9.
9. Murhekar MV, Clapham H. COVID-19 serosurveys for public health decision making. *The Lancet Global Health*. 2021;9(5):e559-e60.
10. Page MJ, McKenzie JE, Bossuyt PM, Boutron I, Hoffmann TC, Mulrow CD, et al. The PRISMA 2020 statement: an updated guideline for reporting systematic reviews. *BMJ*. 2021;372:n71.

11. Uzzani M, Hammady H, Fedorowicz Z, Elmagarmid A. Rayyan — a web and mobile app for systematic reviews. 2016;5(210).
12. Van Walle I, Leitmeyer K, Broberg EK. Meta-analysis of the clinical performance of commercial SARS-CoV-2 nucleic acid, antigen and antibody tests up to 22 August 2020. medRxiv. 2020:2020.09.16.20195917.
13. Gudbjartsson DF, Norddahl GL, Melsted P, Gunnarsdottir K, Holm H, Eythorsson E, et al. Humoral Immune Response to SARS-CoV-2 in Iceland. *N Engl J Med*. 2020;383(18):1724-34.
14. Koronaepidemiaan väestöserologiatutkimuksen viikkoraportti. Finnish Institute for Health and Welfare - THL  
2021. 01/01/2021. Available from: [https://www.thl.fi/roko/cov-vaestoserologia/sero\\_report\\_weekly.html](https://www.thl.fi/roko/cov-vaestoserologia/sero_report_weekly.html)
15. Zakhshvili K. Sero-epidemiological Cross-sectional investigation on COVID-19 virus infection in Georgia. 2020.
16. Roederer T, Mollo B, Vincent C, Nikolay B, Llosa AE, Nesbitt R, et al. Seroprevalence and risk factors of exposure to COVID-19 in homeless people in Paris, France: a cross-sectional study. *The Lancet Public Health*. 2021;6(4):e202-e9.
17. Runkel S, Kowalzik F, Gehring S, Winter J, Grandt CL, Marron M, et al. Prevalence of Severe Acute Respiratory Syndrome Coronavirus-2-specific Antibodies in German Blood Donors during the COVID-19 Pandemic. *Clin Lab*. 2020;66(10).
18. Lundkvist Å, Hanson S, Olsen B. Pronounced difference in Covid-19 antibody prevalence indicates cluster transmission in Stockholm, Sweden. *Infection Ecology & Epidemiology*. 2020;10(1):1806505.
19. Egerup P, Fich Olsen L, Christiansen A-MH, Westergaard D, Severinsen ER, Hviid KVR, et al. Severe Acute Respiratory Syndrome Coronavirus 2 (SARS-CoV-2) Antibodies at Delivery in Women, Partners, and Newborns. *Obstetrics & Gynecology*. 2021;137(1):49-55.
20. Mattern J, Vauloup-Fellous C, Zakaria H, Benachi A, Carrara J, Letourneau A, et al. Post lockdown COVID-19 seroprevalence and circulation at the time of delivery, France. *PLoS One*. 2020;15(10):e0240782-e.
21. Tsatsaris V, Mariaggi A-A, Launay O, Couffignal C, Rousseau J, Ancel PY, et al. SARS-COV-2 IgG antibody response in pregnant women at delivery. *J Gynecol Obstet Hum Reprod*. 2020;50(7):102041-.
22. Cosma S, Borella F, Carosso A, Sciarrone A, Cusato J, Corcione S, et al. The “scar” of a pandemic: Cumulative incidence of COVID-19 during the first trimester of pregnancy. *Journal of Medical Virology*. 2020;93(1):537-40.
23. Crovetto F, Crispi F, Llorba E, Figueras F, Gómez-Roig MD, Gratacós E. SEROPREVALENCE AND CLINICAL SPECTRUM OF SARS-CoV-2 INFECTION IN THE FIRST VERSUS THIRD TRIMESTER OF PREGNANCY. medRxiv. 2020:2020.06.17.20134098.
24. Villalaín C, Herraiz I, Luczkowiak J, Pérez-Rivilla A, Folgueira MD, Mejía I, et al. Seroprevalence analysis of SARS-CoV-2 in pregnant women along the first pandemic outbreak and perinatal outcome. *PLoS One*. 2020;15(11):e0243029-e.
25. Lumley SF, Eyre DW, McNaughton AL, Howarth A, Hoosdally S, Hatch SB, et al. SARS-CoV-2 antibody prevalence, titres and neutralising activity in an antenatal cohort, United Kingdom, 14 April to 15 June 2020. *Euro surveill*. 2020;25(42).
26. Castro Dopico X, Muschiol S, Christian M, Hanke L, Sheward DJ, Grinberg NF, et al. Seropositivity in blood donors and pregnant women during the first year of SARS-CoV-2 transmission in Stockholm, Sweden. *Journal of Internal Medicine*. 2021;290(3):666-76.
27. Emmenegger M, De Cecco E, Lamparter D, Jacquat RIPB, Ebner D, Schneider MM, et al. Early peak and rapid decline of SARS-CoV-2 seroprevalence in a Swiss metropolitan region. medRxiv. 2020:2020.05.31.20118554-2020.05.31.



- 1
- 2
- 3 28. Clarke C, Predecki M, Dhutia A, Ali MA, Sajjad H, Shivakumar O, et al. High Prevalence of
- 4 Asymptomatic COVID-19 Infection in Hemodialysis Patients Detected Using Serologic Screening. *J Am*
- 5 *Soc Nephrol.* 2020;31(9):1969-75.
- 6 29. Zambelli A, Fotia V, Bosetti T, Negrini G, di Croce A, Moro C, et al. Prevalence and clinical
- 7 impact of asymptomatic or mildly symptomatic SARS-CoV-2 infection among actively treated cancer
- 8 patients during COVID-19 pandemic in Italy. *Annals of Oncology.* 2020;31:S994.
- 9 30. Cabezón-Gutiérrez L, Custodio-Cabello S, Palka-Kotlowska M, Oliveros-Acebes E, García-
- 10 Navarro MJ, Khosravi-Shahi P. Seroprevalence of SARS-CoV-2-specific antibodies in cancer
- 11 outpatients in Madrid (Spain): A single center, prospective, cohort study and a review of available
- 12 data. *Cancer Treat Rev.* 2020;90:102102-.
- 13 31. Montenegro P, Brotons C, Serrano J, FernÁndez D, Garcia-Ramos C, Ichazo Ba, et al.
- 14 Community seroprevalence of COVID-19 in probable and possible cases at primary health care
- 15 centres in Spain. 2020.
- 16 32. Stringhini S, Wisniak A, Piumatti G, Azman AS, Lauer SA, Baysson H, et al. Seroprevalence of
- 17 anti-SARS-CoV-2 IgG antibodies in Geneva, Switzerland (SEROCoV-POP): a population-based study.
- 18 *The Lancet.* 2020;396(10247):313-9.
- 19 33. Vos ERA, den Hartog G, Schepp RM, Kaaijk P, van Vliet J, Helm K, et al. Nationwide
- 20 seroprevalence of SARS-CoV-2 and identification of risk factors in the general population of the
- 21 Netherlands during the first epidemic wave. *J epidemiol community health (1979).* 2020.
- 22 34. Zuridin; N, Tatyana K. Population-based age-stratified seroepidemiological investigation
- 23 protocol for coronavirus 2019 (COVID-19) infection in Kyrgyz Republic. 2020.
- 24 35. Pedersen OB, Nissen J, Dinh KM, Schwinn M, Kaspersen KA, Boldsen JK, et al. SARS-CoV-2
- 25 infection fatality rate among elderly retired Danish blood donors - A cross-sectional study. *Clin infect*
- 26 *dis.* 2020.
- 27 36. Stefanelli P, Bella A, Fedele G, Pancheri S, Leone P, Vacca P, et al. Prevalence of SARS-CoV-2
- 28 IgG antibodies in an area of northeastern Italy with a high incidence of COVID-19 cases: a population-
- 29 based study. *Clin microbiol infect.* 2020.
- 30 37. Barchuk A, Skougarevskiy D, Titaev K, Shirokov D, Raskina Y, Novkunkskaya A, et al.
- 31 Seroprevalence of SARS-CoV-2 antibodies in Saint Petersburg, Russia: a population-based study.
- 32 *Scientific Reports.* 2021;11(1):12930.
- 33 38. Richard A, Wisniak A, Perez-Saez J, Garrison-Desany H, Petrovic D, Piumatti G, et al.
- 34 Seroprevalence of anti-SARS-CoV-2 IgG antibodies, risk factors for infection and associated symptoms
- 35 in Geneva, Switzerland: a population-based study. *medRxiv.* 2020:2020.12.16.20248180.
- 36 39. Jogi P, Soeorg H, Ingerainen D, Soots M, Lattekivi F, Naaber P, et al. Seroprevalence of SARS-
- 37 CoV-2 IgG antibodies in two regions of Estonia (KoroSero-EST-1). 2020.
- 38 40. Sanjin Musa, Elma Catovic Baralija, Mia Blazevic, Seila Cilovic-Lagarija, Gorana Ahmetovic-
- 39 Karic, Alma Ljuca, et al. Seroepidemiological investigation for coronavirus 2019 (COVID-19) infection
- 40 in the Federation of Bosnia and Herzegovina. 2020.
- 41 41. Tsertsvadze T, Gatsrelia L, Mirziashvili M, Dvali N, Abutidze A, Metchurchlishvili R, et al.
- 42 SARS-CoV-2 antibody seroprevalence in Tbilisi, the capital city of country of Georgia. *medRxiv.*
- 43 2020:2020.09.18.20195024.
- 44 42. Tsitsilonis OE, Paraskevis D, Lianidou E, Pierros V, Akalestos A, Kastritis E, et al.
- 45 Seroprevalence of Antibodies against SARS-CoV-2 among the Personnel and Students of the National
- 46 and Kapodistrian University of Athens, Greece: A Preliminary Report. *Life-Basel.* 2020;10(9).
- 47 43. Pagani G, Conti F, Giacomelli A, Bernacchia D, Rondanin R, Prina A, et al. Seroprevalence of
- 48 SARS-CoV-2 significantly varies with age: Preliminary results from a mass population screening.
- 49 *Journal of Infection.* 2020;81(6):E10-E2.
- 50
- 51
- 52
- 53
- 54
- 55
- 56
- 57
- 58
- 59
- 60

- 1  
2  
3 44. Fiore JR, Centra M, De Carlo A, Granato T, Rosa A, Sarno M, et al. Results from a survey in  
4 healthy blood donors in South Eastern Italy indicate that we are far away from herd immunity to  
5 SARS-CoV-2. *J med virol.* 2020.
- 6 45. Vena A, Berruti M, Adessi A, Blumetti P, Brignole M, Cognato R, et al. Prevalence of  
7 antibodies to SARS-CoV-2 in Italian adults and associated risk factors. *J Clin Med.* 2020;9(9):1-9.
- 8 46. Gallian P, Pastorino B, Morel P, Chiaroni J, Ninove L, de Lamballerie X. Lower prevalence of  
9 antibodies neutralizing SARS-CoV-2 in group O French blood donors. *Antiviral Res.* 2020;181:104880-  
10
- 11 47. Ward H, Cooke G, Atchison C, Whitaker M, Elliott J, Moshe M, et al. Declining prevalence of  
12 antibody positivity to SARS-CoV-2: a community study of 365,000 adults. *medRxiv.*  
13 2020:2020.10.26.20219725.
- 14 48. Slot E, Hogema BM, Reusken Reimerink JHC, Molier M, Karregat JHM, J Novotná VMJJ, et  
15 al. Low SARS-CoV-2 seroprevalence in blood donors in the early COVID-19 epidemic in the  
16 Netherlands. *Nat Commun.* 2020;11(1):5744-.
- 17 49. Popova Ezhlova, Yu EBA, Melnikova AA, Stepanova TF, Sharukho GV, Letyushev AN, et al.  
18 Distribution of SARS-CoV-2 seroprevalence among residents of the Tyumen Region during the COVID-  
19 19 epidemic period. *Journal of microbiology, epidemiology and immunobiology. Journal of*  
20 *Microbiology Epidemiology Immunobiology.* 2020;97(5):392-400.
- 21 50. Knabl L, Mitra T, Kimpel J, Rössler A, Volland A, Walser A, et al. High SARS-CoV-2  
22 seroprevalence in children and adults in the Austrian ski resort of Ischgl. *Communications Medicine.*  
23 2021;1(1):4.
- 24 51. Vince A, Zadro R, Sostar Z, Sternak SL, Vranes J, Skaro V, et al. SARS-CoV-2 Seroprevalence in  
25 a Cohort of Asymptomatic, RT-PCR Negative Croatian First League Football Players. 2020.
- 26 52. Fontanet A, Tondeur L, Grant R, Temmam S, Madec Y, Bigot T, et al. SARS-CoV-2 infection in  
27 schools in a northern French city: a retrospective serological cohort study in an area of high  
28 transmission, France, January to April 2020. *Eurosurveillance.* 2021;26(15):2001695.
- 29 53. Streeck H, Schulte B, Kummerer BM, Richter E, Holler T, Fuhrmann C, et al. Infection fatality  
30 rate of SARS-CoV2 in a super-spreading event in Germany. *Nat Commun.* 2020;11(1):5829.
- 31 54. Santos-Hövenner C, Neuhauser HK, Rosario AS, Busch M, Schlaud M, Hoffmann R, et al.  
32 Serology- and PCR-based cumulative incidence of SARS-CoV-2 infection in adults in a successfully  
33 contained early hotspot (CoMoLo study), Germany, May to June 2020. *Euro surveill.* 2020;25(47).
- 34 55. Pérez-García F, Pérez-Zapata A, Arcos N, De la Mata M, Ortiz M, Simón E, et al. Severe acute  
35 respiratory coronavirus virus 2 (SARS-CoV-2) infection among hospital workers in a severely affected  
36 institution in Madrid, Spain: A surveillance cross-sectional study. *Infection Control & Hospital*  
37 *Epidemiology.* 2021;42(7):803-9.
- 38 56. Herzog S, De Bie J, Abrams S, Wouters I, Ekinci E, Patteet L, et al. Seroprevalence of IgG  
39 antibodies against SARS coronavirus 2 in Belgium – a serial prospective cross-sectional nationwide  
40 study of residual samples (March – October 2020). *medRxiv.* 2021:2020.06.08.20125179.
- 41 57. Roxhed N, Bendes A, Dale M, Mattsson C, Hanke L, Dodig-Crnković T, et al. Multianalyte  
42 serology in home-sampled blood enables an unbiased assessment of the immune response against  
43 SARS-CoV-2. *Nature Communications.* 2021;12(1):3695.
- 44 58. Valenti L, Bergna A, Pelusi S, Facciotti F, Lai A, Tarkowski M, et al. SARS-CoV-2 seroprevalence  
45 trends in healthy blood donors during the COVID-19 Milan outbreak.
- 46 59. Armann JP, Unrath M, Kirsten C, Lueck C, Dalpke A, Berner R. Anti-SARS-CoV-2 IgG antibodies  
47 in adolescent students and their teachers in Saxony, Germany (SchoolCoviDD19): very low  
48 seroprevalence and transmission rates.
- 49 60. Mack D, Gartner BC, Rossler A, Kimpel J, Donde K, Harzer O, et al. Prevalence of SARS-CoV-2  
50 IgG antibodies in a large prospective cohort study of elite football players in Germany (May-June  
51 2020): implications for a testing protocol in asymptomatic individuals and estimation of the rate of  
52 undetected cases. *Clin Microbiol Infect.* 2021;27(3):473 e1- e4.
- 53  
54  
55  
56  
57  
58  
59  
60



- 1  
2  
3 61. Le Vu S, Jones G, Anna F, Rose T, Richard J-B, Bernard-Stoecklin S, et al. Prevalence of SARS-  
4 CoV-2 antibodies in France: results from nationwide serological surveillance. *Nature*  
5 *Communications*. 2021;12(1):3025.
- 6 62. COVID-19: The National Prevalence Survey. Results of antibody test with 18,000 invited  
7 participants, week 34-36. . Statens Serum Institute; 2020 07/10/2020. 07/10/2020. Accessed:  
8 Available from: [https://www.ssi.dk/-/media/arkiv/dk/aktuelt/nyheder/2020/notat---covid-19-](https://www.ssi.dk/-/media/arkiv/dk/aktuelt/nyheder/2020/notat---covid-19-prvalensundersgelsen.pdf?la=da)  
9 [prvalensundersgelsen.pdf?la=da](https://www.ssi.dk/-/media/arkiv/dk/aktuelt/nyheder/2020/notat---covid-19-prvalensundersgelsen.pdf?la=da)
- 10 63. Lenicek K, J., Zrinski Topic R, Stevanovic V, Lukic-Grlic A, Tabain I, Misak Z, et al.  
11 Seroprevalence of SARS-CoV-2 infection among children in Children's Hospital Zagreb during the  
12 initial and second wave of COVID-19 pandemic in Croatia. (1846-7482 (Electronic)).
- 13 64. Enhanced Surveillance of COVID-19 in Scotland: Population-based seroprevalence  
14 surveillance Public Health Scotland; 2020 30 September 2020. 30 September 2020.  
15 Accessed:01/01/2021. Available from: [https://publichealthscotland.scot/publications/enhanced-](https://publichealthscotland.scot/publications/enhanced-surveillance-of-covid-19-in-scotland/enhanced-surveillance-of-covid-19-in-scotland-population-based-seroprevalence-surveillance-30-september-2020/)  
16 [surveillance-of-covid-19-in-scotland/enhanced-surveillance-of-covid-19-in-scotland-population-](https://publichealthscotland.scot/publications/enhanced-surveillance-of-covid-19-in-scotland/enhanced-surveillance-of-covid-19-in-scotland-population-based-seroprevalence-surveillance-30-september-2020/)  
17 [based-seroprevalence-surveillance-30-september-2020/](https://publichealthscotland.scot/publications/enhanced-surveillance-of-covid-19-in-scotland/enhanced-surveillance-of-covid-19-in-scotland-population-based-seroprevalence-surveillance-30-september-2020/)
- 18 65. Sweden PHAo. Påvisning av antikroppar efter genomgången COVID-19 i blodprov från  
19 öppenvården (Delrapport 1). 2020. Available from:  
20 [https://www.folkhalsomyndigheten.se/publicerat-material/publikationsarkiv/p/pavisning-av-](https://www.folkhalsomyndigheten.se/publicerat-material/publikationsarkiv/p/pavisning-av-antikroppar-efter-genomgangen-covid-19-i-blodprov-fran-oppenvarden-delrapport-1/)  
21 [antikroppar-efter-genomgangen-covid-19-i-blodprov-fran-oppenvarden-delrapport-1/](https://www.folkhalsomyndigheten.se/publicerat-material/publikationsarkiv/p/pavisning-av-antikroppar-efter-genomgangen-covid-19-i-blodprov-fran-oppenvarden-delrapport-1/)
- 22 66. Påvisning av antikroppar efter genomgången COVID-19 hos blodgivare (Delrapport 2). Public  
23 Health Agency of Sweden (Folkhälsomyndigheten); 2020. 01/06/2021. Available from:  
24 [https://www.folkhalsomyndigheten.se/publicerat-material/publikationsarkiv/p/pavisning-av-](https://www.folkhalsomyndigheten.se/publicerat-material/publikationsarkiv/p/pavisning-av-antikroppar-efter-genomgangen-covid-19-hos-blodgivare-delrapport-2/)  
25 [antikroppar-efter-genomgangen-covid-19-hos-blodgivare-delrapport-2/](https://www.folkhalsomyndigheten.se/publicerat-material/publikationsarkiv/p/pavisning-av-antikroppar-efter-genomgangen-covid-19-hos-blodgivare-delrapport-2/)
- 26 67. Weekly Coronavirus Disease 2019 (COVID-19) Surveillance Report: Week 22. Public Health  
27 England; 2020. 01/01/2021. Available from:  
28 [https://assets.publishing.service.gov.uk/government/uploads/system/uploads/attachment\\_data/file/](https://assets.publishing.service.gov.uk/government/uploads/system/uploads/attachment_data/file/888254/COVID19_Epidemiological_Summary_w22_Final.pdf)  
29 [888254/COVID19\\_Epidemiological\\_Summary\\_w22\\_Final.pdf](https://assets.publishing.service.gov.uk/government/uploads/system/uploads/attachment_data/file/888254/COVID19_Epidemiological_Summary_w22_Final.pdf)
- 30 68. Weekly Coronavirus Disease 2019 (COVID-19) Surveillance Report: Week 39. Public Health  
31 England; 2020. 01/01/2021. Available from:  
32 [https://assets.publishing.service.gov.uk/government/uploads/system/uploads/attachment\\_data/file/](https://assets.publishing.service.gov.uk/government/uploads/system/uploads/attachment_data/file/921561/Weekly_COVID19_Surveillance_Report_week_39_FINAL.pdf)  
33 [921561/Weekly\\_COVID19\\_Surveillance\\_Report\\_week\\_39\\_FINAL.pdf](https://assets.publishing.service.gov.uk/government/uploads/system/uploads/attachment_data/file/921561/Weekly_COVID19_Surveillance_Report_week_39_FINAL.pdf)
- 34 69. Weekly Coronavirus Disease 2019 (COVID-19) surveillance report: Week 38. Public Health  
35 England; 2020. Available from:  
36 [https://assets.publishing.service.gov.uk/government/uploads/system/uploads/attachment\\_data/file/](https://assets.publishing.service.gov.uk/government/uploads/system/uploads/attachment_data/file/919676/Weekly_COVID19_Surveillance_Report_week_38_FINAL_UPDATED.pdf)  
37 [919676/Weekly\\_COVID19\\_Surveillance\\_Report\\_week\\_38\\_FINAL\\_UPDATED.pdf](https://assets.publishing.service.gov.uk/government/uploads/system/uploads/attachment_data/file/919676/Weekly_COVID19_Surveillance_Report_week_38_FINAL_UPDATED.pdf)
- 38 70. Weekly Coronavirus Disease 2019 (COVID-19) surveillance report: Week 37. Public Health  
39 England; 2020. 01/01/2021. Available from:  
40 [https://assets.publishing.service.gov.uk/government/uploads/system/uploads/attachment\\_data/file/](https://assets.publishing.service.gov.uk/government/uploads/system/uploads/attachment_data/file/920372/Weekly_COVID19_Surveillance_Report_week_37_FINAL_UPDATED.pdf)  
41 [920372/Weekly\\_COVID19\\_Surveillance\\_Report\\_week\\_37\\_FINAL\\_UPDATED.pdf](https://assets.publishing.service.gov.uk/government/uploads/system/uploads/attachment_data/file/920372/Weekly_COVID19_Surveillance_Report_week_37_FINAL_UPDATED.pdf)
- 42 71. Weekly Coronavirus Disease 2019 (COVID-19) surveillance report: Week 36. Public Health  
43 England; 2020. 01/01/2021. Available from:  
44 [https://assets.publishing.service.gov.uk/government/uploads/system/uploads/attachment\\_data/file/](https://assets.publishing.service.gov.uk/government/uploads/system/uploads/attachment_data/file/920373/Weekly_COVID19_Surveillance_Report_week_36_UPDATED.pdf)  
45 [920373/Weekly\\_COVID19\\_Surveillance\\_Report\\_week\\_36\\_UPDATED.pdf](https://assets.publishing.service.gov.uk/government/uploads/system/uploads/attachment_data/file/920373/Weekly_COVID19_Surveillance_Report_week_36_UPDATED.pdf)
- 46 72. Weekly Coronavirus Disease 2019 (COVID-19) surveillance report: Week 35. Public Health  
47 England; 2020. 01/01/2021. Available from:  
48 [https://assets.publishing.service.gov.uk/government/uploads/system/uploads/attachment\\_data/file/](https://assets.publishing.service.gov.uk/government/uploads/system/uploads/attachment_data/file/912973/Weekly_COVID19_Surveillance_Report_week_35_FINAL.PDF)  
49 [912973/Weekly\\_COVID19\\_Surveillance\\_Report\\_week\\_35\\_FINAL.PDF](https://assets.publishing.service.gov.uk/government/uploads/system/uploads/attachment_data/file/912973/Weekly_COVID19_Surveillance_Report_week_35_FINAL.PDF)
- 50  
51  
52  
53  
54  
55  
56  
57  
58  
59  
60

- 1  
2  
3 73. Ulyte A, Radtke T, Abela IA, Haile SR, Berger C, Huber M, et al. Clustering and longitudinal  
4 change in SARS-CoV-2 seroprevalence in school children in the canton of Zurich, Switzerland:  
5 prospective cohort study of 55 schools. *BMJ*. 2021;372:n616.
- 6 74. Bobrovitz N, Arora RK, Cao C, Boucher E, Liu M, Donnici C, et al. Global seroprevalence of  
7 SARS-CoV-2 antibodies: A systematic review and meta-analysis. *PLOS ONE*. 2021;16(6):e0252617.
- 8 75. Rostami A, Sepidarkish M, Leeflang MMG, Riahi SM, Nourollahpour Shiadeh M, Esfandyari S,  
9 et al. SARS-CoV-2 seroprevalence worldwide: a systematic review and meta-analysis. *Clinical  
10 Microbiology and Infection*. 2021;27(3):331-40.
- 11 76. Chen X, Chen Z, Azman AS, Deng X, Sun R, Zhao Z, et al. Serological evidence of human  
12 infection with SARS-CoV-2: a systematic review and meta-analysis. *The Lancet Global Health*.  
13 2021;9(5):e598-e609.
- 14 77. Bobrovitz N, Arora RK, Cao C, Boucher E, Liu M, Rahim H, et al. Global seroprevalence of  
15 SARS-CoV-2 antibodies: a systematic review and meta-analysis. *medRxiv*. 2020:2020.11.17.20233460.
- 16 78. Vaselli NM, Hungerford D, Shenton B, Khashkhusa A, Cunliffe NA, French N. The  
17 Seroprevalence of SARS-CoV-2 in Europe: A Systematic Review. *bioRxiv*. 2021:2021.04.12.439425.
- 18 79. Goldman M, Steele WR, Di Angelantonio E, van den Hurk K, Vassallo RR, Germain M, et al.  
19 Comparison of donor and general population demographics over time: a BEST Collaborative group  
20 study. (1537-2995 (Electronic)).
- 21 80. Deeks JJ, Dinnes J, Takwoingi Y, Davenport C, Spijker R, Taylor-Phillips S, et al. Antibody tests  
22 for identification of current and past infection with SARS-CoV-2. *Cochrane Database of Systematic  
23 Reviews*. 2020(6).
- 24 81. Lisboa Bastos M, Tavaziva G, Abidi SK, Campbell JR, Haraoui L-P, Johnston JC, et al. Diagnostic  
25 accuracy of serological tests for covid-19: systematic review and meta-analysis. *BMJ*.  
26 2020;370:m2516.
- 27 82. World Health Organization; 2020. Establishment of the WHO International Standard and  
28 Reference Panel for anti-SARS-CoV-2 antibody. Available from:  
29 <https://www.who.int/publications/m/item/WHO-BS-2020.2403>.
- 30 83. Kristiansen PA, Page M, Bernasconi V, Mattiuzzo G, Dull P, Makar K, et al. WHO International  
31 Standard for anti-SARS-CoV-2 immunoglobulin. *The Lancet*. 2021;397(10282):1347-8.
- 32 84. The JRC releases new reference materials for the quality control of SARS-CoV-2 antibody  
33 tests. European Centre for Disease Prevention and Control; 2021. Available from:  
34 <https://ec.europa.eu/jrc/en/news/new-reference-materials-quality-control-covid-19-antibody-tests>
- 35 85. Seow J, Graham C, Merrick B, Acors S, Pickering S, Steel KJA, et al. Longitudinal observation  
36 and decline of neutralizing antibody responses in the three months following SARS-CoV-2 infection in  
37 humans. *Nature Microbiology*. 2020;5(12):1598-607.
- 38 86. Chia WN, Zhu F, Ong SWX, Young BE, Fong S-W, Le Bert N, et al. Dynamics of SARS-CoV-2  
39 neutralising antibody responses and duration of immunity: a longitudinal study. *The Lancet Microbe*.  
40 2021;2(6):e240-e9.
- 41 87. Clapham H Fau - Hay J, Hay J Fau - Routledge I, Routledge I Fau - Takahashi S, Takahashi S Fau  
42 - Choisy M, Choisy M Fau - Cummings D, Cummings D Fau - Grenfell B, et al. Seroepidemiologic Study  
43 Designs for Determining SARS-COV-2 Transmission and Immunity. (1080-6059 (Electronic)).
- 44 88. Wagner A, Guzek A, Ruff J, Jasinska J, Scheikl U, Zwazl I, et al. A longitudinal seroprevalence  
45 study in a large cohort of working adults reveals that neutralising SARS-CoV-2 RBD-specific antibodies  
46 persist for at least six months independent of the severity of symptoms. *medRxiv*.  
47 2020:2020.12.22.20248604.
- 48 89. Ladage D, Höglinger Y, Ladage D, Adler C, Yalcin I, Braun RJ. SARS-CoV-2 antibody prevalence  
49 and symptoms in a local Austrian population. *medRxiv*. 2020:2020.11.03.20219121.
- 50  
51  
52  
53  
54  
55  
56  
57  
58  
59  
60

- 1  
2  
3 90. Boey L, Roelants M, Merckx J, Hens N, Desombere I, Duysburgh E, et al. Age-dependent seroprevalence of SARS-CoV-2 antibodies in school-aged children from areas with low and high community transmission. *European Journal of Pediatrics*. 2021.
- 4  
5  
6 91. Bokonjic. A national study of seroprevalence of COVID-19 infection in the population of the  
7 Republika Srpska 2020.
- 8  
9 92. New preliminary results from the representative seroprevalence study of COVID-19. Statens  
10 Serum Institute; 2020. 01/01/2021. Available from:  
11 [https://files.ssi.dk/notat\\_foreloebige\\_resultater\\_pilotundersogelse\\_seropraevalens\\_COVID-](https://files.ssi.dk/notat_foreloebige_resultater_pilotundersogelse_seropraevalens_COVID-19_29_6_2020)  
12 [19\\_29\\_6\\_2020](https://files.ssi.dk/notat_foreloebige_resultater_pilotundersogelse_seropraevalens_COVID-19_29_6_2020)
- 13 93. Petersen MS, Strom M, Christiansen DH, Fjallsbak JP, Eliassen EH, Johansen M, et al.  
14 Seroprevalence of SARS-CoV-2-Specific Antibodies, Faroe Islands. *Emerg Infect Dis*. 2020;26(11):2761-  
15 3.
- 16 94. Jõgi P, Soeorg H, Ingerainen D, Soots M, Lättekivi F, Naaber P, et al. Seroprevalence of SARS-  
17 CoV-2 IgG antibodies in two regions of Estonia (KoroSero-EST-1). *medRxiv*.  
18 2020:2020.10.21.20216820.
- 19 95. Carrat F, de Lamballerie X, Rahib D, Blanché H, Lapidus N, Artaud F, et al. Seroprevalence of  
20 SARS-CoV-2 among adults in three regions of France following the lockdown and associated risk  
21 factors: a multicohort study. *medRxiv*. 2020:2020.09.16.20195693.
- 22 96. Aziz NA, Corman VM, Echterhoff AKC, Müller MA, Richter A, Schmandke A, et al.  
23 Seroprevalence and correlates of SARS-CoV-2 neutralizing antibodies from a population-based study  
24 in Bonn, Germany. *Nature Communications*. 2021;12(1):2117.
- 25 97. Weis S, Scherag A, Baier M, Kiehntopf M, Kamradt T, Kolanos S, et al. Antibody response  
26 using six different serological assays in a completely PCR-tested community after a coronavirus  
27 disease 2019 outbreak; the CoNAN study. *Clinical Microbiology and Infection*.  
28 2021;27(3):470.e1-.e9.
- 29 98. Merkely B, Szabo AJ, Kosztin A, Berenyi E, Sebestyén A, Lengyel C, et al. Novel coronavirus  
30 epidemic in the Hungarian population, a cross-sectional nationwide survey to support the exit policy  
31 in Hungary. *Geroscience*. 2020;42(4):1063-74.
- 32 99. Guerriero M, Bisoffi Z, Poli A, Micheletto C, Pomari C. Prevalence of asymptomatic SARS-CoV-  
33 2-positive individuals in the general population of northern Italy and evaluation of a diagnostic  
34 serological ELISA test: a cross-sectional study protocol. *BMJ Open*. 2020;10(10):e040036-e.
- 35 100. Cito F, Amato L, Di Giuseppe A, Danzetta ML, Iannetti S, Petrini A, et al. A COVID-19 Hotspot  
36 Area: Activities and Epidemiological Findings. *Microorganisms*. 2020;8(11):1711-.
- 37 101. Snoeck CJ, Vaillant M, Abdelrahman T, Satagopam VP, Turner JD, Beaumont K, et al.  
38 Prevalence of SARS-CoV-2 infection in the Luxembourgish population: the CON-VINCE study.
- 39 102. Popova Ezhlova, Melânikova AA, Balakhonov SV, Chesnokova MV, Dubrovina VI, Lyalina LV, et  
40 al. Experience in studying seroprevalence to SARS-CoV-2 virus in the population of the Irkutsk Region  
41 during COVID-19 outbreak. *Problemy Osobo Opasnykh Infektsii*. 2020(3):106-13.
- 42 103. Popova Ezhlova, Melânikova AA, Historik OA, Mosevich OS, Lyalina LV, Smirnov VS, et al.  
43 Assessment of the herd immunity to SARS-CoV-2 among the population of the Leningrad region  
44 during the COVID-19 epidemic. *Problemy Osobo Opasnykh Infektsii*. 2020(3):114-23.
- 45 104. Popova Ezhlova, Melânikova AA, Bashketova NS, Fridman RK, Lyalina LV, Smirnov VS, et al.  
46 Herd immunity to SARS-CoV-2 among the population in Saint-Petersburg during the COVID-19  
47 epidemic. *Problemy Osobo Opasnykh Infektsii*. 2020(3):124-30.
- 48 105. Pollan M, Perez-Gomez B, Pastor-Barriuso R, Oteo J, Hernan MA, Perez-Olmeda M, et al.  
49 Prevalence of SARS-CoV-2 in Spain (ENE-COVID): a nationwide, population-based seroepidemiological  
50 study. *Lancet*. 2020;396(10250):535-44.
- 51 106. Förekomsten av antikroppar mot SARS-CoV-2 i stadsdelen Rinkeby-Kista, Stockholm, 22–24  
52 juni 2020. Public Health Agency of Sweden; 2020 04/09/2020. Report No.: 20129 04/09/2020.
- 53  
54  
55  
56  
57  
58  
59

1  
2  
3 Accessed:01/01/2021. Available from:

4 <https://www.folkhalsomyndigheten.se/contentassets/2cf102cd299c4382b9a0447dc0626356/foreko>  
5 [msten-antikroppar-rinkeby-kista.pdf](https://www.folkhalsomyndigheten.se/contentassets/2cf102cd299c4382b9a0447dc0626356/foreko)

6 107. Bi Q, Lessler J, Eckerle I, Lauer SA, Kaiser L, Vuilleumier N, et al. Household Transmission of  
7 SARS-CoV-2: Insights from a Population-based Serological Survey. 2020.

8 108. Wells PM, Doores KJ, Couvreur S, Nunez RM, Seow J, Graham C, et al. Estimates of the rate of  
9 infection and asymptomatic COVID-19 disease in a population sample from SE England. *Journal of*  
10 *Infection*. 2020.

11 109. Tsaneva-Damyanova D. SARS-CoV-2: seroepidemiological pattern in northeastern Bulgaria.  
12 *Biotechnology & Biotechnological Equipment*. 2020;34(1):441-6.

13 110. Bloomfield M, Pospisilova I, Cabelova T, Sediva A, Ibrahimova M, Borecka K, et al. Searching  
14 for COVID-19 Antibodies in Czech Children – A Needle in the Haystack. *Frontiers in Pediatrics*.  
15 2020;8.

16 111. Capai L, Ayhan N, Masse S, Canarelli J, Priet S, Simeoni M-H, et al. Seroprevalence of SARS-  
17 CoV-2 IgG Antibodies in Corsica (France), April and June 2020. *Journal of Clinical Medicine*.  
18 2020;9(11):3569-.

19 112. Cohen R, Jung C, Ouldali N, Sellam A, Batard C, Cahn-Sellem F, et al. Assessment of spread of  
20 SARS-CoV-2 by RT-PCR and concomitant serology in children in a region heavily affected by COVID-19  
21 pandemic. *medRxiv*. 2020:2020.06.12.20129221.

22 113. Bogogiannidou Z, Vontas A, Dadouli K, Kyritsi MA, Soteriades S, Nikoulis DJ, et al. Repeated  
23 leftover serosurvey of SARS-CoV-2 IgG antibodies, Greece, March and April 2020. *Euro surveill*.  
24 2020;25(31).

25 114. Posfay-Barbe KM, Andrey DO, Virzi J, Cohen P, Pigny F, Goncalves AR, et al. Prevalence of IgG  
26 against SARS-CoV-2 and evaluation of a rapid MEDsan IgG test in children seeking medical care. *Clin*  
27 *infect dis*. 2020.

28 115. Dickson E, Palmateer NE, Murray J, Robertson C, Waugh C, Wallace LA, et al. Enhanced  
29 surveillance of COVID-19 in Scotland: population-based seroprevalence surveillance for SARS-CoV-2  
30 during the first wave of the epidemic. *Public health*. 2021;190:132-4.

31 116. Erikstrup C, Hother CE, Pedersen OBV, Mølbak K, Skov RL, Holm DK, et al. Estimation of SARS-  
32 CoV-2 Infection Fatality Rate by Real-time Antibody Screening of Blood Donors. *Clinical Infectious*  
33 *Diseases*. 2020;72(2):249-53.

34 117. Danmark Bi. Bloddonorere testes for overstået infektion med coronavirus. *Bloddonorerne i*  
35 *Danmark*; 2020. 01/01/2021. Available from: [www.bloddonor.dk/coronavirus/](http://www.bloddonor.dk/coronavirus/)

36 118. Grzelak L, Temmam S, Planchais C, Demeret C, Tondeur L, Huon Cl, et al. A comparison of four  
37 serological assays for detecting anti-SARS-CoV-2 antibodies in human serum samples from different  
38 populations. *Sci transl med*. 2020;12(559).

39 119. Fischer B, Knabbe C, Vollmer T. SARS-CoV-2 IgG seroprevalence in blood donors located in  
40 three different federal states, Germany, March to June 2020. *Euro surveill*. 2020;25(28).

41 120. Percivalle E, Cambiè G, Cassaniti I, Nepita EV, Maserati R, Ferrari A, et al. Prevalence of SARS-  
42 CoV-2 specific neutralising antibodies in blood donors from the Lodi Red Zone in Lombardy, Italy, as  
43 at 06 April 2020. *Euro surveill*. 2020;25(24).

44 121. Thompson CP, Grayson NE, Paton RS, Bolton JS, Lourenço J, Penman BS, et al. Detection of  
45 neutralising antibodies to SARS-CoV-2 to determine population exposure in Scottish blood donors  
46 between March and May 2020. *Euro surveill*. 2020;25(42).

47 122. Fogel O, Mariaggi AA, Méritet JF, André E, Boisson M, Combier A, et al. Étude prospective de  
48 séroprévalence du Sars-Cov-2 chez 249 patients suivis pour un rhumatisme inflammatoire chronique.  
49 *Revue du Rhumatisme*. 2020;87:A292-A3.



- 1  
2  
3 123. Choi M, Bachmann F, Naik MG, Duettmann W, Duerr M, Zukunft B, et al. Low Seroprevalence  
4 of SARS-CoV-2 Antibodies during Systematic Antibody Screening and Serum Responses in Patients  
5 after COVID-19 in a German Transplant Center. *J Clin Med*. 2020;9(11).
- 6 124. Rauber Conrad, Tiwari-Heckler Shilpa, Jan P, Arianeb M, Frederike L, Philip G, et al. SARS-CoV-  
7 2 seroprevalence and clinical features of COVID-19 in a German liver transplant recipient cohort: a  
8 prospective serosurvey study. *Transplantation Proceedings*. 2020.
- 9 125. Medas F, Cappellacci F, Anedda G, Canu GL, Del Giacco S, Calò PG, et al. Seroprevalence of  
10 SARS-Cov-2 in the setting of a non-dedicated COVID-19 hospital in a low CoV-2 incidence area:  
11 Implications for surgery. *Annals of Medicine and Surgery*. 2020.
- 12 126. Capasso N, Palladino R, Montella E, Pennino F, Lanzillo R, Carotenuto A, et al. Prevalence of  
13 SARS-CoV-2 Antibodies in Multiple Sclerosis: The Hidden Part of the Iceberg. 2020;9(12).
- 14 127. Cento V, Alteri C, Merli M, Di Ruscio F, Tartaglione L, Rossotti R, et al. Effectiveness of  
15 infection-containment measures on SARS-CoV-2 seroprevalence and circulation from May to July  
16 2020, in Milan, Italy. *PLoS One*. 2020;15(11):e0242765-e.
- 17 128. Berte R, Mazza S, Stefanucci MR, Noviello D, Costa S, Ciafardini C, et al. Seroprevalence of  
18 SARS-CoV2 in IBD Patients Treated with Biologic Therapy. *J Crohns Colitis*. 2021;15(5):864-8.
- 19 129. Prados N, González-Ravina C, Vergara V, Herrero J, Cruz M, Requena A. RISK FACTOR  
20 ANALYSIS FOR SARS-COV-2 SEROPOSITIVITY WITHIN ASSISTED REPRODUCTIVE. *Fertility and Sterility*.  
21 2020;114(3):e542-e.
- 22 130. Prendecki M, Clarke C, Gleeson S, Greathead L, Santos E, McLean A, et al. Detection of SARS-  
23 CoV-2 Antibodies in Kidney Transplant Recipients. *J Am Soc Nephrol*. 2020;31(12):2753-6.
- 24 131. Krátká Z Fau - Fürst T, Fürst T Fau - Vencálek O, Vencálek O Fau - Kůrková V, Kůrková V Fau -  
25 Šimečková E, Šimečková E Fau - Fleischmannová J, Fleischmannová J Fau - Strojil J, et al. Exploratory  
26 drilling: how to set up, carry out, and evaluate a seroprevalence study. (0008-7335 (Print)).
- 27 132. Jerković I, Ljubić T, Bašić Ž, Kružić I, Kunac N, Bezić J, et al. SARS-CoV-2 Antibody  
28 Seroprevalence in Industry Workers in Split-Dalmatia and Šibenik-Knin County, Croatia. *J Occup  
29 Environ Med*. 2021;63(1):32-7.
- 30 133. Anna F, Goyard S, Lalanne AI, Nevo F, Gransagne M, Souque P, et al. High seroprevalence but  
31 short-lived immune response to SARS-CoV-2 infection in Paris. *European Journal of Immunology*.  
32 2021;51(1):180-90.
- 33 134. Krähling V, Kern M, Halwe S, Müller H, Rohde C, Savini M, et al. Epidemiological study to  
34 detect active SARS-CoV-2 infections and seropositive persons in a selected cohort of employees in the  
35 Frankfurt am Main metropolitan area. *medRxiv*. 2020:2020.05.20.20107730-2020.05.20.
- 36 135. National Agency for Public Health RoM. Serological surveillance of COVID-19 in the general  
37 population with age stratification in the Republic of Moldova. 2020.
- 38 136. Gujski M, Jankowski M, Pinkas J, Wierzba W, Samel-Kowalik P, Zaczynski A, et al. Prevalence  
39 of Current and Past SARS-CoV-2 Infections among Police Employees in Poland, June-July 2020. *Journal  
40 of Clinical Medicine*. 2020;9(10):11-.
- 41 137. Roarty C, Tonry C, McFetridge L, Mitchell H, Watson C, Waterfield T. Kinetics and  
42 seroprevalence of SARS-CoV-2 antibodies in children. *Lancet, Infect dis (Online)*. 2020.
- 43 138. Waterfield T, Watson C, Moore R, Ferris K, Tonry C, Watt A, et al. Seroprevalence of SARS-  
44 CoV-2 antibodies in children: a prospective multicentre cohort study. *Arch Dis Child*. 2021;106(7):680-  
45 6.
- 46 139. Reisinger EC, von Possel R, Warnke P, Geerdes-Fenge HF, Hemmer CJ, Pfefferle S, et al.  
47 Mütter-Screening in einem COVID-19-Niedrig-Pandemiegebiet: Bestimmung SARS-CoV-2-spezifischer  
48 Antikörper bei 401 Rostocker Müttern mittels ELISA und Immunfluoreszenz-Bestätigungstest. *Dtsch  
49 Med Wochenschr*. 2020;145(17):e96-e100.
- 50  
51  
52  
53  
54  
55  
56  
57  
58  
59  
60

1  
2  
3 140. Lastrucci Lorini, Chiara Del Riccio, Marco Gori, Eleonora Chiesi, Fabrizio Sartor, Gino Zanella,  
4 et al. SARS-CoV-2 Seroprevalence Survey in People Involved in Different Essential Activities during the  
5 General Lock-Down Phase in the Province of Prato (Tuscany, Italy). *Vaccines*. 2020;8(4):778-.

6 141. Soriano V, Meiriño R, Corral O, Guallar MP. Severe Acute Respiratory Syndrome Coronavirus  
7 2 Antibodies in Adults in Madrid, Spain. *Clin Infect Dis*. 2021;72(6):1101-2.

8 142. Davis KAS, Carr E, Leightley D, Vitiello V, Bergin-Cartwright G, Lavelle G, et al. Indicators of  
9 past COVID-19 infection status: Findings from a large occupational cohort of staff and postgraduate  
10 research students from a UK university. *medRxiv*. 2021:2020.12.07.20245183.  
11  
12  
13  
14  
15

## 16 Figure Legend

17  
18  
19 **Figure 1:** PRISMA Flow chart of SARS-CoV-2 seroprevalence study selection

20  
21 **Figure 2:** Geographical distribution of SARS-CoV-2 seroprevalence studies published in the WHO  
22 European Region between 1 Jan – 31 Dec 2020

23  
24 **Table 1:** Study characteristics

25  
26 **Table 2:** Characteristics of eligible seroprevalence studies

27  
28 **Figure 3:** National (a) and sub-national (b) seroprevalence estimates of SARS-CoV-2 antibodies over  
29 time in the WHO European Region (1/1/2020-31/12/2021)

30  
31 **Figure 4:** Correlation between seroprevalence point estimates from low to medium risk of bias studies  
32 and cumulative (a) incidence and (b) deaths in all populations, in the WHO European Region  
33 (1/1/2020-31/12/2020)

34  
35  
36 **Table S1** Inclusion and exclusion criteria

37  
38 **Table S2:** Description of the quality assessment criteria used

39  
40 **Supplementary figure S1:** Forest plot of the seroprevalence of SARS-CoV-2 antibodies in  
41 Community/Household samples with corresponding 95% confidence intervals in WHO European  
42 Region (1/1/2020-31/12/2020)

43  
44 **Supplementary figure S2:** Forest plot of the seroprevalence of SARS-CoV-2 antibodies in (Top to  
45 bottom, Left to Right) a) Residual sera b) Blood donors c) Pregnant or Parturient women d) Patients  
46 seeking care (non-COVID) and e) Other populations

47  
48  
49 **Supplementary figure S3:** Time point of conducted sero-epidemiology studies in relation to country  
50 epidemic activity  
51  
52  
53  
54  
55  
56  
57  
58  
59  
60

1  
2  
3  
4  
5  
6  
7  
8  
9  
10  
11  
12  
13  
14  
15  
16  
17  
18  
19  
20  
21  
22  
23  
24  
25  
26  
27  
28  
29  
30  
31  
32  
33  
34  
35  
36  
37  
38  
39  
40  
41  
42  
43  
44  
45  
46  
47  
48  
49  
50  
51  
52  
53  
54  
55  
56  
57  
58  
59  
60

For peer review only

**Figure 1: PRISMA Flow chart of SARS-CoV-2 seroprevalence study selection**

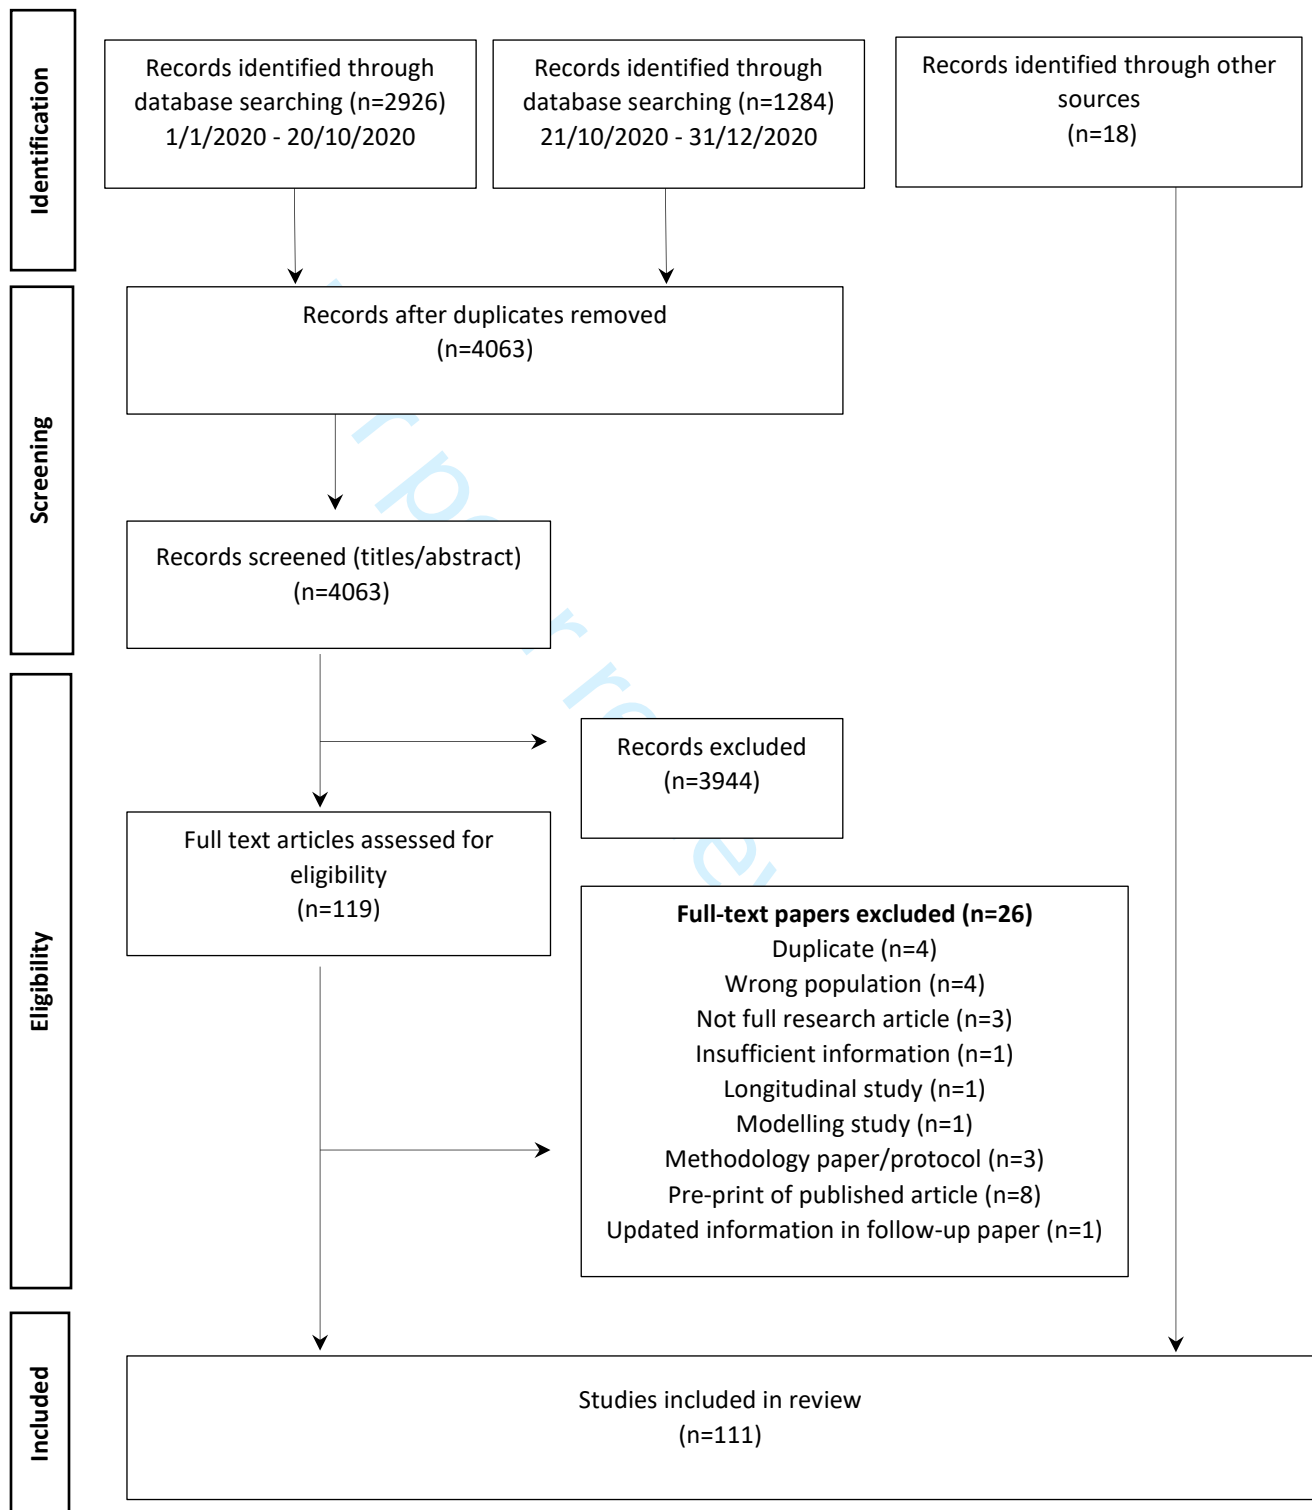



**Figure 2: Geographical distribution of SARS-CoV-2 seroprevalence studies published in the WHO European Region between 1 Jan – 31 Dec 2020**

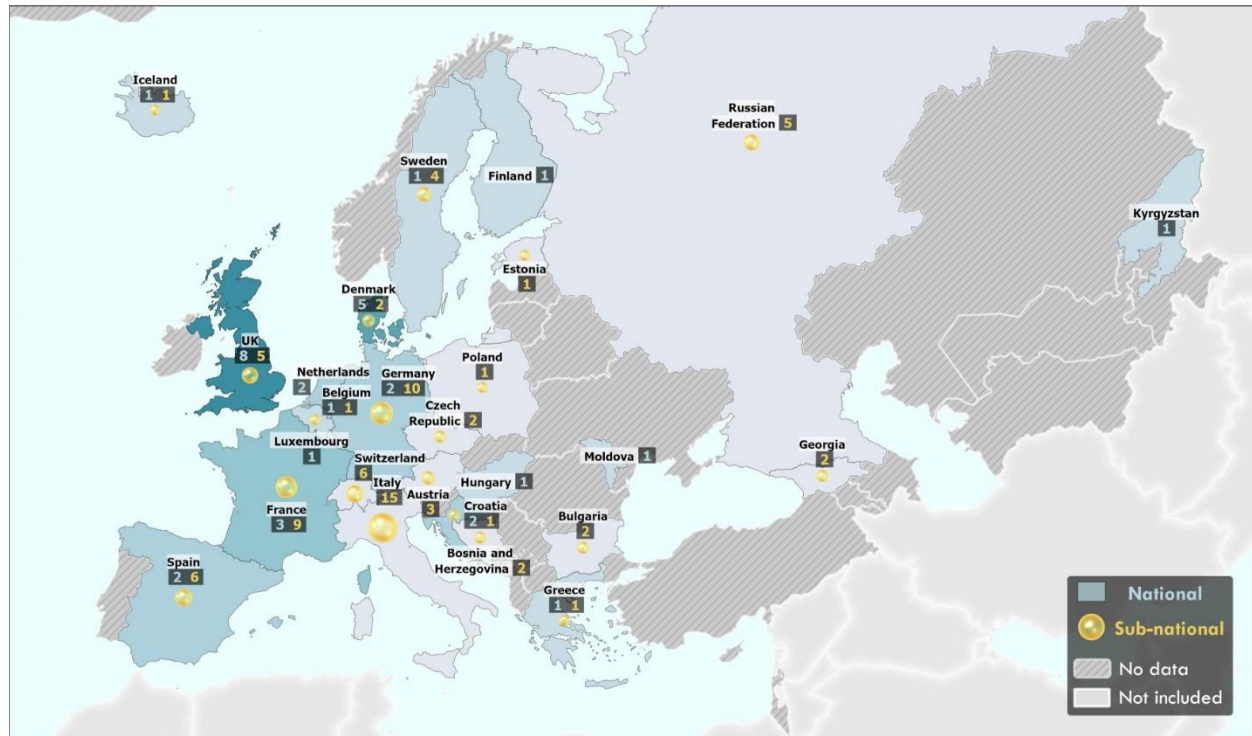

Countries with national-level seroprevalence studies are reported in blue (shade of blue reflects the number of studies conducted in the country/territory). Subnational-level seroprevalence studies are reported as a yellow circle (Size of circle reflects number of subnational studies conducted in the country/territory). Number of studies are listed in boxes under name. Countries with not studies are coloured in grey. The designations employed and the presentation of this material do not imply the expression of any opinion whatsoever on the part of the Secretariat of the World Health Organization concerning the legal status of any country, territory, city or area or of its authorities, or concerning the delimitation of its frontiers and boundaries. Dotted and dashed lines on maps represent approximate locations for which there may not yet be full agreement.

1  
2  
3  
4  
5  
6  
7  
8  
9  
10  
11  
12  
13  
14  
15  
16  
17  
18  
19  
20  
21  
22  
23  
24  
25  
26  
27  
28  
29  
30  
31  
32  
33  
34  
35  
36  
37  
38  
39  
40  
41  
42  
43  
44  
45  
46  
47  
48  
49  
50  
51  
52  
53  
54  
55  
56  
57  
58  
59  
60

For peer review only

Table 2 Characteristics of eligible seroprevalence studies

|    | Author                  | Country                                             | Study Location         | EU/non-EU                                     | WHO UNITY aligned | Geographic location | Publication type | Study period           | Study population              | Sample method      | Sampling frame | No of participants | Seropositivity (%)                       | Serologica l method                                            | Assay                  | Antibody measured/ Antigen                                                                          | Sensitivity (%)                                    | Specificity (%)                         | Quality score                           | Overall risk of bias |        |
|----|-------------------------|-----------------------------------------------------|------------------------|-----------------------------------------------|-------------------|---------------------|------------------|------------------------|-------------------------------|--------------------|----------------|--------------------|------------------------------------------|----------------------------------------------------------------|------------------------|-----------------------------------------------------------------------------------------------------|----------------------------------------------------|-----------------------------------------|-----------------------------------------|----------------------|--------|
| 1  |                         |                                                     |                        |                                               |                   |                     |                  |                        |                               |                    |                |                    |                                          |                                                                |                        |                                                                                                     |                                                    |                                         |                                         |                      |        |
| 2  | Household and community |                                                     |                        |                                               |                   |                     |                  |                        |                               |                    |                |                    |                                          |                                                                |                        |                                                                                                     |                                                    |                                         |                                         |                      |        |
| 3  | 1                       | Knabl (50)                                          | Austria                | Tyrol, Ischgl                                 | EU/EEA            | Yes                 | City/local       | Published <sup>a</sup> | 21-27 Apr                     | General population | Random         | HH/C samples       | 1473                                     | 42.4% (39.8 - 44.7%)                                           | ELISA; CLIA            | EUROIMMU N; Abbott Laboratories;                                                                    | Anti-S IgA; IgG; Anti-N IgG                        | Not reported                            | Not reported                            | 8                    | Low    |
| 4  |                         |                                                     |                        |                                               |                   |                     |                  |                        |                               |                    |                |                    |                                          |                                                                |                        |                                                                                                     |                                                    |                                         |                                         |                      |        |
| 5  | 2                       | Wagner (88)                                         | Austria                | Vienna                                        | EU/EEA            | No                  | City/local       | Pre-print              | 12-17 Apr                     | General population | Convenience    | HH/C samples       | 1655                                     | 10.15%                                                         | ELISA; ELISA; CLIA; MN | EUROIMMU N; Beijing Wantai Biological Pharmacy Enterprise; EUROIMMU N; Roche Diagnostics; In-house; | IgA; IgG IgM and total Abs; IgG; Total Abs; NT-Abs | Not reported                            | Not reported                            | 3                    | High   |
| 6  |                         |                                                     |                        |                                               |                   |                     |                  |                        |                               |                    |                |                    |                                          |                                                                |                        |                                                                                                     |                                                    |                                         |                                         |                      |        |
| 7  |                         |                                                     |                        |                                               |                   |                     |                  |                        |                               |                    |                |                    |                                          |                                                                |                        |                                                                                                     |                                                    |                                         |                                         |                      |        |
| 8  |                         |                                                     |                        |                                               |                   |                     |                  |                        |                               |                    |                |                    |                                          |                                                                |                        |                                                                                                     |                                                    |                                         |                                         |                      |        |
| 9  |                         |                                                     |                        |                                               |                   |                     |                  |                        |                               |                    |                |                    |                                          |                                                                |                        |                                                                                                     |                                                    |                                         |                                         |                      |        |
| 10 |                         |                                                     |                        |                                               |                   |                     |                  |                        |                               |                    |                |                    |                                          |                                                                |                        |                                                                                                     |                                                    |                                         |                                         |                      |        |
| 11 | 3                       | Ladage (89)                                         | Austria                | Weißkirchen/Wachau                            | EU/EEA            | No                  | City/local       | Published              | 1-15 Jun                      | General population | Convenience    | HH/C samples       | 835                                      | ELISA: IgG 8.5%; IgA 9.0%;                                     | ELISA;                 | EUROIMMU N                                                                                          | IgA; IgG                                           | Not reported                            | Not reported                            | 5                    | Medium |
| 12 |                         |                                                     |                        |                                               |                   |                     |                  |                        |                               |                    |                |                    |                                          |                                                                |                        |                                                                                                     |                                                    |                                         |                                         |                      |        |
| 13 | 4                       | Boey (90)                                           | Belgium                | Pelt; Alken                                   | EU/EEA            | No                  | Regional         | Published <sup>a</sup> | 21 Sept - 6 Oct               | General population | Random         | HH/C samples       | 362                                      | 4.4% (low exposed - Pelt); 14.4% (high exposed - Alken)        | ELISA;                 | Beijing Wantai Biological Pharmacy Enterprise; EUROIMMU N                                           | Total Abs;                                         | 99.6%                                   | Not reported                            | 4                    | Medium |
| 14 |                         |                                                     |                        |                                               |                   |                     |                  |                        |                               |                    |                |                    |                                          |                                                                |                        |                                                                                                     |                                                    |                                         |                                         |                      |        |
| 15 |                         |                                                     |                        |                                               |                   |                     |                  |                        |                               |                    |                |                    |                                          |                                                                |                        |                                                                                                     |                                                    |                                         |                                         |                      |        |
| 16 |                         |                                                     |                        |                                               |                   |                     |                  |                        |                               |                    |                |                    |                                          |                                                                |                        |                                                                                                     |                                                    |                                         |                                         |                      |        |
| 17 | 5                       | Bokonjic (91)                                       | Bosnia and Herzegovina | Republika Srpska                              | non-EU/EEA        | Yes                 | Regional         | Not yet published      | 4 Nov - 16 Dec                | General population | Random         | HH/C samples       | 1855                                     | 40.4%                                                          | ELISA                  | Beijing Wantai Biological Pharmacy Enterprise;                                                      | Total Abs;                                         | 94%                                     | 100%                                    | N/A                  | N/A    |
| 18 |                         |                                                     |                        |                                               |                   |                     |                  |                        |                               |                    |                |                    |                                          |                                                                |                        |                                                                                                     |                                                    |                                         |                                         |                      |        |
| 19 | 6                       | Kunchev and Stoitsova                               | Bulgaria               | Plovdiv                                       | EU/EEA            | Yes                 | City/local       | Not yet published      | 18-May-13 Jun                 | General population | Random         | HH/C samples       | 553                                      | 1.08% (0.5-2.35); 0.04% (0-0.12) <sup>3</sup>                  | ELISA;                 | EUROIMMU N;                                                                                         | IgG; IgA                                           | Not reported                            | Not reported                            | N/A                  | N/A    |
| 20 |                         |                                                     |                        |                                               |                   |                     |                  |                        |                               |                    |                |                    |                                          |                                                                |                        |                                                                                                     |                                                    |                                         |                                         |                      |        |
| 21 | 7                       | Statens Serum Institute                             | Denmark                | Copenhagen ; Aarhus; Aalborg; Næstved; Odense | EU/EEA            | Yes                 | National         | Report                 | Apr                           | General population | Random         | HH/C samples       | 1071                                     | 1.1% (0.5-1.8)                                                 | ELISA                  | Not reported                                                                                        | Not reported                                       | Not reported                            | Not reported                            | 6                    | Medium |
| 22 |                         |                                                     |                        |                                               |                   |                     |                  |                        |                               |                    |                |                    |                                          |                                                                |                        |                                                                                                     |                                                    |                                         |                                         |                      |        |
| 23 |                         |                                                     |                        |                                               |                   |                     |                  |                        |                               |                    |                |                    |                                          |                                                                |                        |                                                                                                     |                                                    |                                         |                                         |                      |        |
| 24 | 8                       | Statens Serum Institute (92) (62)                   | Denmark                | Copenhagen ; Aarhus; Aalborg; Næstved; Odense | EU/EEA            | Yes                 | National         | Report                 | 7 May - 9 Jun; 14 Aug - 1 Oct | General population | Random         | HH/C samples       | 2444; 18000                              | 1.2 (0.7-1.7); 2.2 (1.8 - 2.6)                                 | ELISA                  | Beijing Wantai Biological Pharmacy Enterprise;                                                      | Not reported                                       | Not reported                            | Not reported                            | 9                    | Low    |
| 25 |                         |                                                     |                        |                                               |                   |                     |                  |                        |                               |                    |                |                    |                                          |                                                                |                        |                                                                                                     |                                                    |                                         |                                         |                      |        |
| 26 |                         |                                                     |                        |                                               |                   |                     |                  |                        |                               |                    |                |                    |                                          |                                                                |                        |                                                                                                     |                                                    |                                         |                                         |                      |        |
| 27 | 9                       | Petersen (93)                                       | Denmark                | Faroe Islands                                 | EU/EEA            | Yes                 | Regional         | Published              | 27 Apr - 1 May                | General population | Random         | HH/C samples       | 1500                                     | 0.7% <sup>3</sup>                                              | ELISA                  | Beijing Wantai Biological Pharmacy Enterprise;                                                      | IgM; IgG                                           | 94%                                     | 100%                                    | 9                    | Low    |
| 28 |                         |                                                     |                        |                                               |                   |                     |                  |                        |                               |                    |                |                    |                                          |                                                                |                        |                                                                                                     |                                                    |                                         |                                         |                      |        |
| 29 |                         |                                                     |                        |                                               |                   |                     |                  |                        |                               |                    |                |                    |                                          |                                                                |                        |                                                                                                     |                                                    |                                         |                                         |                      |        |
| 30 | 10                      | Jõgi (94)                                           | Estonia                | Tallinn; Saaremaa                             | EU/EEA            | No                  | Regional         | Pre-print              | 8 May - 31 Jul                | General population | Random         | HH/C samples       | Total 1960; Tallin: 1006; Saaremaa: 954; | Tallinn: 1.5% § ; Saaremaa: 6.7% §                             | CMIA; CLIA; LIPS; LFA; | Abbott Laboratories DiaSorin Liaison; In-house Biosensor                                            | IgG; IgG; NA IgM/IgG                               | 92.7%                                   | 99.9%                                   | 12                   | Low    |
| 31 |                         |                                                     |                        |                                               |                   |                     |                  |                        |                               |                    |                |                    |                                          |                                                                |                        |                                                                                                     |                                                    |                                         |                                         |                      |        |
| 32 |                         |                                                     |                        |                                               |                   |                     |                  |                        |                               |                    |                |                    |                                          |                                                                |                        |                                                                                                     |                                                    |                                         |                                         |                      |        |
| 33 | 11                      | Finnish Institute for Health and Welfare – THL (14) | Finland                |                                               | EU/EEA            | No                  | National         | Report                 | 13 Apr - 28 Dec               | General population | Random         | HH/C samples       | 4863                                     | *see report                                                    | FMIA                   | In-house                                                                                            | Not reported                                       | Not reported                            | Not reported                            | 7                    | Low    |
| 34 |                         |                                                     |                        |                                               |                   |                     |                  |                        |                               |                    |                |                    |                                          |                                                                |                        |                                                                                                     |                                                    |                                         |                                         |                      |        |
| 35 |                         |                                                     |                        |                                               |                   |                     |                  |                        |                               |                    |                |                    |                                          |                                                                |                        |                                                                                                     |                                                    |                                         |                                         |                      |        |
| 36 |                         |                                                     |                        |                                               |                   |                     |                  |                        |                               |                    |                |                    |                                          |                                                                |                        |                                                                                                     |                                                    |                                         |                                         |                      |        |
| 37 | 12                      | Carrat (95)                                         | France                 | Ile-de-France; Grand Est; Nouvelle-Aquitaine; | EU/EEA            | Yes                 | National         | Pre-print              | 4 May - 23 Jun                | General population | Random         | HH/C samples       | 14628                                    | Ile-de-France: 10%; Grand Est: 9.0%; Nouvelle-Aquitaine: 3.1%; | ELISA; MN              | EUROIMMU N; In-house                                                                                | IgG                                                | ELISA-S=97.9%; ELISA-NP=50.3%; SN=41.4% | ELISA-S=97.7%; ELISA-NP=99.5%; SN=99.5% | 9                    | Low    |
| 38 |                         |                                                     |                        |                                               |                   |                     |                  |                        |                               |                    |                |                    |                                          |                                                                |                        |                                                                                                     |                                                    |                                         |                                         |                      |        |
| 39 |                         |                                                     |                        |                                               |                   |                     |                  |                        |                               |                    |                |                    |                                          |                                                                |                        |                                                                                                     |                                                    |                                         |                                         |                      |        |
| 40 |                         |                                                     |                        |                                               |                   |                     |                  |                        |                               |                    |                |                    |                                          |                                                                |                        |                                                                                                     |                                                    |                                         |                                         |                      |        |
| 41 |                         |                                                     |                        |                                               |                   |                     |                  |                        |                               |                    |                |                    |                                          |                                                                |                        |                                                                                                     |                                                    |                                         |                                         |                      |        |
| 42 |                         |                                                     |                        |                                               |                   |                     |                  |                        |                               |                    |                |                    |                                          |                                                                |                        |                                                                                                     |                                                    |                                         |                                         |                      |        |
| 43 |                         |                                                     |                        |                                               |                   |                     |                  |                        |                               |                    |                |                    |                                          |                                                                |                        |                                                                                                     |                                                    |                                         |                                         |                      |        |
| 44 |                         |                                                     |                        |                                               |                   |                     |                  |                        |                               |                    |                |                    |                                          |                                                                |                        |                                                                                                     |                                                    |                                         |                                         |                      |        |
| 45 |                         |                                                     |                        |                                               |                   |                     |                  |                        |                               |                    |                |                    |                                          |                                                                |                        |                                                                                                     |                                                    |                                         |                                         |                      |        |
| 46 |                         |                                                     |                        |                                               |                   |                     |                  |                        |                               |                    |                |                    |                                          |                                                                |                        |                                                                                                     |                                                    |                                         |                                         |                      |        |
| 47 |                         |                                                     |                        |                                               |                   |                     |                  |                        |                               |                    |                |                    |                                          |                                                                |                        |                                                                                                     |                                                    |                                         |                                         |                      |        |

| 13 | Zakhashvili (15) | Georgia                | Martvili; Kobuleti; Borjomi; Khelvachauri | non-EU/EEA                                                                     | Yes        | National | Not yet published | 1 – 14 Aug 2020; 1 – 14 Dec 2020 | General population | Random             | HH/C samples | 1218; 1219                                                  | August: 0%; 0%; 0.7%; 1.3%          | ELISA; CMIA                                            | Wantai Total Ab ELISA; Roche Diagnostics     | Total Abs; Total Abs;                                                                        | Not reported   | Not reported  | N/A             | N/A |        |
|----|------------------|------------------------|-------------------------------------------|--------------------------------------------------------------------------------|------------|----------|-------------------|----------------------------------|--------------------|--------------------|--------------|-------------------------------------------------------------|-------------------------------------|--------------------------------------------------------|----------------------------------------------|----------------------------------------------------------------------------------------------|----------------|---------------|-----------------|-----|--------|
| 1  |                  |                        |                                           |                                                                                |            |          |                   |                                  |                    |                    |              |                                                             | December: 44.3%; 35%; 45.5%; 51.3%; |                                                        |                                              |                                                                                              |                |               |                 |     |        |
| 2  |                  |                        |                                           |                                                                                |            |          |                   |                                  |                    |                    |              |                                                             |                                     |                                                        |                                              |                                                                                              |                |               |                 |     |        |
| 3  | 14               | Tsertsvadze (41)       | Georgia                                   | Tbilisi                                                                        | non-EU/EEA | No       | City/local        | Pre-print                        | 18-27 May          | General population | Convenience  | HH/C samples                                                | 1068                                | 1.02% (0.38-2.18) §                                    | LFA                                          | Zhejiang Orient Gene Biotech                                                                 | IgG            | 93.1%         | 99.2%           | 6   | Medium |
| 4  | 15               | Aziz (96)              | Germany                                   | Bonn                                                                           | EU/EEA     | Yes; No  | City/local        | Published^                       | 24 Apr - 30 Jun    | General population | Convenience  | Group 1: HH/C samples (Rhineland study); Group 2: Voluntary | Group 1: 4771; Group 2: 360;        | 0.97% (0.72-1.30%); 1.94% (0.84-4.42%)                 | ELISA                                        | EUROIMMUN                                                                                    | IgG            | Not reported  | Not reported    | 7   | Low    |
| 5  | 16               | Strecek(53)            | Germany                                   | Heinsberg                                                                      | EU/EEA     | Yes      | City/local        | Published^                       | 31 Mar - 4 Jun     | General population | Random       | HH/C samples                                                | 919                                 | 14.1% (11.15% - 17.27%) §                              | ELISA                                        | EUROIMMUN;                                                                                   | IgA; IgG       | 90.9%         | 99.1%           | 10  | Low    |
| 6  | 17               | Santos-Hövenner (54)   | Germany                                   | Kupferzell                                                                     | EU/EEA     | Yes      | City/local        | Published                        | 20 May - 9 Jun     | General population | Random       | HH/C samples                                                | 2203                                | 12% (10.4-14%) §                                       | ELISA                                        | EUROIMMUN                                                                                    | IgG            | 88.3%         | 99.2%           | 10  | Low    |
| 7  | 18               | Weis (97)              | Germany                                   | Thuringia                                                                      | EU/EEA     | No       | Regional          | Published                        | 12-22 May          | General population | Random       | HH/C samples                                                | 626                                 | 8.4%                                                   | ELISA; ELISA; CLIA; CMIA; CLIA; CLIA         | EUROIMMUN; Epitope Diagnostics Inc. DiaSorin Abbott Laboratories Roche Diagnostics Snibe Co. | IgG            | Not reported  | Not reported    | 10  | Low    |
| 8  | 19               | Merkely (98)           | Hungary                                   |                                                                                | EU/EEA     | Yes      | National          | Published                        | 1-16 May           | General population | Random       | HH/C samples                                                | 10474                               | 0.68 (0.5-0.86)                                        | CMIA                                         | Abbott Laboratories                                                                          | IgG            | Not reported  | Not reported    | 6   | Medium |
| 9  | 20               | Pagani (43)            | Italy                                     | Castiglione D'Adda                                                             | EU/EEA     | Yes      | City/local        | Published                        | 18 May - 7 Jun     | General population | Random       | HH/C samples                                                | 509                                 | 22.6% (17.2-29.1)                                      | CMIA; LFA                                    | Abbott Laboratories ; Prima Lab                                                              | IgG            | Not reported  | Not reported    | 9   | Low    |
| 10 | 21               | Stefanelli (36)        | Italy                                     | Trento                                                                         | EU/EEA     | Yes      | Regional          | Published                        | 5-15 May           | General population | Random       | HH/C samples                                                | 6075                                | 25.7% §                                                | CMIA                                         | Abbott Laboratories                                                                          | IgG            | 99.60%        | 100%            | 10  | Low    |
| 11 | 22               | Guerrero (99)          | Italy                                     | Verona                                                                         | EU/EEA     | Yes      | City/local        | Published                        | 24 Apr - 8 May     | General population | Random       | HH/C samples                                                | 1515                                | 2.6%                                                   | CMIA                                         | Abbott Laboratories                                                                          | IgG            | 81.80%        | 99.30%          | 8   | Low    |
| 12 | 23               | Cito (100)             | Italy                                     | Villa Caldari, Abruzzo region                                                  | EU/EEA     | Yes      | Regional          | Published                        | 18-19 Apr          | General population | Random       | HH/C samples                                                | 687                                 | 10.9% (8.8-13.5%)                                      | ELISA                                        | Beijing Wantai Biological Pharmacy Enterprise;                                               | Total Abs      | 93%           | 100%            | 9   | Low    |
| 13 | 24               | Zuridin & Tatyana (34) | Kyrgyzstan                                | Bishkek City; Osh City; Chui; Osh; Jalal-Abad; Batken; Issyk-Kul; Naryn; Talas | non-EU/EEA | Yes      | National          | Not yet published                | 4 Jul – 12 Aug     | General population | Random       | HH/C samples                                                | 4780                                | 32.5%                                                  | ELISA                                        | Beijing Wantai Biological Pharmacy Enterprise;                                               | Total Abs      | 95%           | 100%            | N/A | N/A    |
| 14 | 25               | Snoeck (101)           | Luxembourg                                |                                                                                | EU/EEA     | Yes      | National          | Pre-print                        | 15 Apr - 5 May     | General population | Random       | HH/C samples                                                | 1862                                | IgG: 2.09% (1.37-2.82) §<br>IgA: 11.07% (9.54-12.60) § | ELISA                                        | EUROIMMUN;                                                                                   | IgG; IgA;      | 85.7%; 92.2%; | 97.8%; 89.2%; 1 | 8   | Low    |
| 15 | 26               | Vos (33)               | Netherlands                               |                                                                                | EU/EEA     | No       | National          | Published                        | 31 Mar - 11 May    | General Population | Random       | HH/C samples                                                | 3207                                | 2.8% (2.1 - 3.7) §                                     | Fluorescent bead-based multiplex immunoassay | In-house                                                                                     | IgG            | 84.40%        | Not reported    | 10  | Low    |
| 16 | 27               | Popova (102)           | Russian Federation                        | Irkutsk Region                                                                 | non-EU/EEA | No       | Regional          | Published                        | 28 Jun - 19 Jul    | General population | Random       | HH/C samples                                                | 2674                                | 5.8% (5.3- 6.2)                                        | ELISA                                        | In house                                                                                     | IgG            | Not reported  | Not reported    | 8   | Low    |
| 17 | 28               | Popova (103)           | Russian Federation                        | Leningrad                                                                      | non-EU/EEA | No       | Regional          | Published                        | 23 Jun - 26 Jun    | General population | Random       | HH/C samples                                                | 3130                                | 20.70%                                                 | ELISA                                        | In house                                                                                     | IgG            | Not reported  | Not reported    | 8   | Low    |
| 18 | 29               | Barchuk (37)           | Russian Federation                        | Saint-Petersburg                                                               | non-EU/EEA | Yes      | City/local        | Published^                       | 27 May - 26 Jun    | General population | Random       | HH/C samples                                                | 1038                                | 9.0% CMIA; 10.8% ELISA §                               | ELISA; CMIA                                  | CoronaPass; Abbott Laboratories                                                              | IgG; Total Abs | 98.7%; 100%   | 100%; 99.6%     | 12  | Low    |
| 19 | 30               | Popova (104)           | Russian Federation                        | Saint-Petersburg                                                               | non-EU/EEA | No       | City/local        | Published                        | 15 Jun - 20 Jun    | General population | Random       | HH/C samples                                                | 2713                                | 26% (24.3-27.7)                                        | ELISA                                        | In house                                                                                     | IgG            | Not reported  | Not reported    | 8   | Low    |

| Page                 | Ref                                  | Author             | Country                           | Region     | EU/EEA | Yes/No     | Study Type             | Date                                                                                         | Population         | Design      | Sample Type              | n                                           | Prevalence                                                                                                                                        | Method                 | Setting                                           | Antibody     | Sensitivity                                     | Specificity                                     | PPV | NPV | LR+ | LR-    | Conclusion |
|----------------------|--------------------------------------|--------------------|-----------------------------------|------------|--------|------------|------------------------|----------------------------------------------------------------------------------------------|--------------------|-------------|--------------------------|---------------------------------------------|---------------------------------------------------------------------------------------------------------------------------------------------------|------------------------|---------------------------------------------------|--------------|-------------------------------------------------|-------------------------------------------------|-----|-----|-----|--------|------------|
| 31                   | Pogorza (49)                         | Russian Federation | Tyumen region                     | non-EU/EEA | No     | Regional   | Published              | 8 - 21 Jun                                                                                   | General population | Random      | HH/C samples             | 2758                                        | 24.5% (22.9- 26.1)                                                                                                                                | ELISA                  | In house                                          | IgG          | Not reported                                    | Not reported                                    | 8   |     |     | Low    |            |
| 32                   | Pollan (105)                         | Spain              |                                   | EU/EEA     | Yes    | National   | Published              | 27 Apr - 11 Ma                                                                               | General population | Random      | HH/C samples             | 51958                                       | 4-6% (4-3-5-0) <sup>1</sup>                                                                                                                       | CLIA; LFA;             | Abbott Laboratories; Zhejiang Orient Gene Biotech | IgG          | 89.7%                                           | 100%                                            | 12  |     |     | Low    |            |
| 33                   | Public Health Agency of Sweden (106) | Sweden             | Rinkeby-Kista district, Stockholm | EU/EEA     | Yes    | City/local | Report                 | 22 Jun - 24 Jun                                                                              | General population | Random      | HH/C samples             | 538                                         | 18.7% (95% CI 14.8-23.3)                                                                                                                          | CMIA; CLIA; LIPS; LFA; | Abbott Laboratories; DiaSorin Liaison             | IgG          | 100                                             | 99.6                                            | 11  |     |     | Low    |            |
| 34                   | Roxhed (57)                          | Sweden             | Stockholm                         | EU/EEA     | Yes    | City/local | Published <sup>^</sup> | mid-Apr - mid-May                                                                            | General population | Random      | HH/C samples             | 878                                         | 12.5% (95% CI: 10.3%-14.7%)                                                                                                                       | ELISA                  | In house                                          | IgM; IgG     | 100%                                            | 98%                                             | 7   |     |     | Low    |            |
| 35                   | Richard (38)                         | Switzerland        | Canton of Geneva                  | non-EU/EEA | Yes    | Regional   | Pre-print              | 6 Apr - 30 Jun                                                                               | General population | Random      | HH/C samples             | 8344                                        | 7.8% (6.8-8.9)                                                                                                                                    | ELISA                  | EUROIMMUN                                         | IgG          | 93%                                             | 100%                                            | 10  |     |     | Low    |            |
| 36                   | Bi (107)                             | Switzerland        | Geneva                            | non-EU/EEA | Yes    | City/local | Pre-print              | 3 Apr - 30 Jun                                                                               | General population | Random      | HH/C samples             | 4354                                        | 6.6%                                                                                                                                              | ELISA                  | EUROIMMUN                                         | IgG          | 93%                                             | 99%                                             | 9   |     |     | Low    |            |
| 37                   | Stringhini (32)                      | Switzerland        | Geneva                            | non-EU/EEA | Yes    | City/local | Published              | 6 April - 9 May                                                                              | General population | Random      | HH/C samples             | 2766                                        | 1st week: 4-8% (2.4-8.0);<br>2nd week: 8-5% (5.9-11.4);<br>3rd week: 10-9% (7.9-14.4);<br>4th week: 6-6% (4.3-9.4);<br>5th week: 10-8% (8.2-13.9) | ELISA                  | EUROIMMUN                                         | IgG          | 93%                                             | 100%                                            | 9   |     | Low |        |            |
| 38                   | Ward (47)                            | United Kingdom     | England                           | non-EU/EEA | No     | National   | Pre-print              | 20 Jun - 13 Jul;<br>31 Jul - 13 Aug;<br>15 Sept - 28 Sept                                    | General population | Random      | HH/C samples             | 99908; 105829; 159367                       | 5.9% (5.78-6.14);<br>4.83 (4.67-5.00);<br>4.38 (4.25-4.51) <sup>1</sup>                                                                           | LFA                    | Fortress Diagnostics                              | IgG          | 84.4%                                           | 98.6%                                           | 9   |     |     | Low    |            |
| 39                   | Wells (108)                          | United Kingdom     | London; South East England        | non-EU/EEA | Yes    | Regional   | Published              | 27 Apr - 2 Jun                                                                               | General population | Convenience | HH/C samples             | 431                                         | 12% (9.1-15.2)                                                                                                                                    | CLIA; CMIA             | Abbott Laboratories; Roche Diagnostics            | IgM; IgG     | 90%                                             | 100%                                            | 6   |     |     | Medium |            |
| <b>Residual sera</b> |                                      |                    |                                   |            |        |            |                        |                                                                                              |                    |             |                          |                                             |                                                                                                                                                   |                        |                                                   |              |                                                 |                                                 |     |     |     |        |            |
| 40                   | Herzog (56)                          | Belgium            | Wallonia Flanders; Brussels       | EU/EEA     | Yes    | National   | Pre-print              | 30 Mar - 5 Apr;<br>20 Apr - 26 Apr;<br>18 May - 25 May;<br>8 Jun - 13 Jun;<br>29 Jun - 4 Jul | General population | Convenience | Residual sera            | Total: 15529; 3910; 3397; 3242; 2960; 3023; | 2.9% (2.3-3.6%);<br>6.0% (5.1-7.1%);<br>6.9% (5.9-8.0%);<br>5.5% (4.7-6.5%);<br>4.5% (3.7-5.4%)                                                   | ELISA                  | EUROIMMUN;                                        | IgG          | 64.5 - 87.8%                                    | 99.20%                                          | 5   |     |     | Medium |            |
| 41                   | Tsaneva-Damyanova (109)              | Bulgaria           | Varna city; North East Bulgaria   | EU/EEA     | Yes    | Regional   | Published              | 26 Mar - 20 Apr                                                                              | General population | Convenience | Residual sera            | 586                                         | 4.8% overall;<br>1.0% IgM,<br>1.2% IgG<br>2.6% IgM and IgG                                                                                        | LFA                    | Zhejiang Orient Gene Biotech                      | IgM; IgG     | 85%                                             | 96%                                             | 4   |     |     | Medium |            |
| 42                   | Bloomfield (110)                     | Czech Republic     | Prague                            | EU/EEA     | Yes    | City/local | Published              | 3 Jul - 19 Aug                                                                               | General population | Convenience | Residual sera (Children) | 200                                         | 0% (0-0.5%)                                                                                                                                       | ELISA; CLIA            | EUROIMMUN; Roche Diagnostics                      | IgA; IgG     | EUROIMMUN: IgA=98.6%; IgG=94.4%; Elecsys=99.5%; | EUROIMMUN: IgA=92.6%; IgG=99.6%; Elecsys=99.8%; | 3   |     |     | High   |            |
| 43                   | Krlezja (65)                         | Croatia            | Zagreb                            | EU/EEA     | No     | National   | Published <sup>^</sup> | 13 - 29 May;<br>24 Oct - 23 Nov                                                              | General population | Convenience | Residual sera (Children) | 240; 308                                    | 2.9%;<br>8.4%                                                                                                                                     | ELISA; CLIA; MN        | Vircell; Roche Cobas Elecsys; In-house            | Not reported | Not reported                                    | Not reported                                    | 3   |     |     | High   |            |
| 44                   | Capai (111)                          | France             | Corsica                           | EU/EEA     | Yes    | Regional   | Published              | 16 Apr - 15 Jun                                                                              | General population | Convenience | Residual sera            | 1973                                        | 5.5% (4.5-6.6%) <sup>§</sup>                                                                                                                      | ELISA; MN              | EUROIMMUN; In-house                               | IgG          | Not reported                                    | Not reported                                    | 8   |     |     | Low    |            |
| 45                   | Cohen (112)                          | France             |                                   | EU/EEA     | Yes    | City/local | Pre-print              | 14 Apr - 12 May                                                                              | General population | Convenience | Residual sera (Children) | 605                                         | 10.7% (8.4-13.5)                                                                                                                                  | LFA                    | Biosynex BSS test                                 | IgM; IgG     | 91.8%                                           | 99.2%                                           | 5   |     |     | Medium |            |
| 46                   | Le Vu (61)                           | France             |                                   | EU/EEA     | Yes    | National   | Published <sup>^</sup> | 9 Mar - 15 Mar;<br>6 Apr - 12 Apr;<br>11 May - 17 May;                                       | General population | Convenience | Residual sera            | Total: 11 021; 3834; 3595; 3592;            | March:0.41% [0.05-0.88] <sup>§</sup> ;<br>April: 4.14% [3.31-4.99] <sup>§</sup> ;<br>May: 4.93% [4.02-5.89] <sup>§</sup>                          | LuLISA; MN             | In-house; In-house;                               | IgG; NT-Abs  | LuLISA N=86%; LuLISA S=96%                      | LuLISA N=100%; LuLISA S=100%                    | 13  |     |     | Low    |            |

| Study ID            | Author(s)                               | Country                | Region                                                                                                      | EU/EEA     | Yes/No | National/Regional/City/local | Published/Report       | Date                                                               | Population         | Convenience | Residual sera | Sample Size                               | Prevalence                                                                                                                                                                                                                                                                                                                      | Method             | Lab                                            | Serology      | Prevalence          | Prevalence          | Number | Quality |
|---------------------|-----------------------------------------|------------------------|-------------------------------------------------------------------------------------------------------------|------------|--------|------------------------------|------------------------|--------------------------------------------------------------------|--------------------|-------------|---------------|-------------------------------------------|---------------------------------------------------------------------------------------------------------------------------------------------------------------------------------------------------------------------------------------------------------------------------------------------------------------------------------|--------------------|------------------------------------------------|---------------|---------------------|---------------------|--------|---------|
| 47                  | Bogogiannidou (113)                     | Greece                 |                                                                                                             | EU/EEA     | Yes    | National                     | Published              | 1 Mar - 30 Apr                                                     | General population | Convenience | Residual sera | 6586                                      | March = 0 (0.0-23%) <sup>‡</sup> ; April=0.23% (0-0.48%) <sup>‡</sup>                                                                                                                                                                                                                                                           | ELISA; ELISA; CMIA | EUROIMMUN; Vircell; Abbott Laboratories        | IgG           | 84%                 | 99.7%               | 8      | Low     |
| 48                  | Gudbjartsson (13)                       | Iceland                |                                                                                                             | EU/EEA     | Yes    | Regional; National           | Published              | 18 Feb - 9 Mar                                                     | General population | Convenience | Residual sera | 470; 24115                                | 0%; Residual sera: 0.30% (0.2 - 0.4) §; Reykjavik: 0.4% (0.3 - 0.6)                                                                                                                                                                                                                                                             | ELISA; ELISA; CLIA | EUROIMMUN; EDI/Eagle; Roche Diagnostics        | IgA; IgM; IgG | Not reported        | 99.80%              | 9      | Low     |
| 49                  | Public Health Agency of Sweden (65, 66) | Sweden                 | Jämtland Härjedalen, Jönköping, Kalmar, Skåne, Stockholm, Uppsala, Västerbotten, Västra Götaland and Örebro | EU/EEA     | No     | National                     | Report                 | 20 Apr to 12 Jun; 12 Oct to 23 Oct; Nov 23 to 4 Dec                | General population | Convenience | Residual sera | 4500 per collection period                | 20 April-26 April: 5.3% (3.8-7.1); 27 April-3 May: 4% (2.71-5.67); 4 May - 10 May: 3.9% (2.61-5.42); 11-17 May: 4.5% (3.07-6.15); 18-24 May: 5.2% (3.67-7); 25-31 May: 5.7% (3.98-7.72); 1-7 June: 6.8% (5.07-8.80); 8-14 June: 5.2% (3.74-7.06); 12-23 October: 6.7% (5.67-7.79); 23 November to 4 December: 7.9% (6.79-9.19); | Not reported       | Sci Life Lab / KTH                             | Not reported  | 98.9                | 99.4                | 6      | Low     |
| 50                  | Posfay-Barbe (114)                      | Switzerland            | Geneva                                                                                                      | non-EU/EEA | No     | City/local                   | Published              | 1-30 Apr                                                           | General population | Convenience | Residual sera | 208                                       | ELISA: 9.1%; LFA: 12.5%                                                                                                                                                                                                                                                                                                         | ELISA; LFA         | EUROIMMUN                                      | IgG           | Not reported; 88.9% | Not reported; 94.7% | 2      | High    |
| 51                  | Dickson (115)                           | United Kingdom         | Scotland                                                                                                    | non-EU/EEA | Yes    | National                     | Published              | 20 Apr - 15 Jun                                                    | General population | Convenience | Residual sera | 4751                                      | 4.3% (4.2-4.5)                                                                                                                                                                                                                                                                                                                  | CLIA               | DiaSorin Liaison                               | IgG           | 87.5%               | 98.6%               | 3      | High    |
| 52                  | Public Health Scotland (64)             | United Kingdom         | Scotland                                                                                                    | EU/EEA     | Yes    | National                     | Report                 | 20 Apr - 17 May; 18 May - 14 Jun; 15 Jun - 12 Jul; 13 Jul - 9 Aug; | General population | Convenience | Residual sera | 2039; 2172; 2709; 2882                    | 4.1% (2.4%, 5.7%); 3.4% (1.8%, 5.0%); 3.9% (2.3%, 5.4%); 3.7% (2.2%, 5.2%)                                                                                                                                                                                                                                                      | CMIA               | DiaSorin Liaison                               | Not reported  | Not reported        | Not reported        | 4      | Medium  |
| <b>Blood donors</b> |                                         |                        |                                                                                                             |            |        |                              |                        |                                                                    |                    |             |               |                                           |                                                                                                                                                                                                                                                                                                                                 |                    |                                                |               |                     |                     |        |         |
| 53                  | Musa (40)                               | Bosnia and Herzegovina | Federation of Bosnia and Herzegovina                                                                        | non-EU/EEA | Yes    | Regional                     | Not yet published      | 1 Nov - 7 Dec                                                      | Blood donors       | Convenience | Blood donors  | 1015                                      | 19.1% (16.7-21.5)                                                                                                                                                                                                                                                                                                               | CMIA               | Abbott Laboratories                            | Total Abs;    | Not reported        | Not reported        | N/A    | N/A     |
| 54                  | Pedersen (35)                           | Denmark                | Danish Capital Region; Zealand Region; Central Denmark Region                                               | EU/EEA     | Yes    | National                     | Published              | 2 Jun - 19 Jun                                                     | Blood donors       | Convenience | Blood donors  | Total: 2311; 17-69yrs: 1110; >70yrs: 1201 | 17-69yrs: 2.5 (1.3-3.8) <sup>‡</sup> >70yrs: 1.4 (0.3-2.5) <sup>‡</sup>                                                                                                                                                                                                                                                         | ELISA              | Beijing Wantai Biological Pharmacy Enterprise; | Total Abs;    | 96.7% (92.4-98.6)   | 99.5% (98.7-99.8)   | 7      | Low     |
| 55                  | Erikstrup (116)                         | Denmark                |                                                                                                             | EU/EEA     | Yes    | National                     | Published <sup>^</sup> | 6 Apr - 3 May                                                      | Blood donors       | Random      | Blood donors  | 20 640                                    | 2.0% (95% CI, 1.8-2.2%); 1.9% (95% CI, 1.8-2.3) <sup>‡</sup>                                                                                                                                                                                                                                                                    | LFA                | Livzon Diagnostics Inc                         | IgM; IgG      | 82.6%               | 99.5%               | 7      | Low     |
| 56                  | Bloddonor (117)                         | Denmark                |                                                                                                             | EU/EEA     | No     | National                     | Report                 | 5 Oct - 31 Dec                                                     | Blood donors       | Convenience | Blood donors  | 71883                                     | October : 2.1% (1.1-2.7); October : 1.9% (0.9-2.5); October : 2.3% (1.3-2.8); October : 2.1% (1.1-2.7); November : 2.2% (1.2-2.7); November : 2.7% (1.6-3.2); November : 2.8% (1.7-3.4); November : 3.2% (2.1-3.8); December : 3.2% (2.2-3.9);                                                                                  | LFA                | Livzon                                         | Not reported  | Not reported        | Not reported        | 4      | Medium  |

| 1  | 2                                    | 3                 | 4                                                                                                                            | 5                  | 6   | 7          | 8         | 9                  | 10           | 11          | 12           | 13                              | 14                                                                                                                                                                                                                                                                                                                                                                        | 15                                | 16                                                                                                           | 17               | 18                        | 19                                                   | 20  | 21         | 22 | 23 | 24 | 25 | 26 | 27 | 28 | 29 | 30 | 31 | 32 | 33 | 34 | 35 | 36 | 37 | 38 | 39 | 40 | 41 | 42 | 43 | 44 | 45 | 46 | 47 |
|----|--------------------------------------|-------------------|------------------------------------------------------------------------------------------------------------------------------|--------------------|-----|------------|-----------|--------------------|--------------|-------------|--------------|---------------------------------|---------------------------------------------------------------------------------------------------------------------------------------------------------------------------------------------------------------------------------------------------------------------------------------------------------------------------------------------------------------------------|-----------------------------------|--------------------------------------------------------------------------------------------------------------|------------------|---------------------------|------------------------------------------------------|-----|------------|----|----|----|----|----|----|----|----|----|----|----|----|----|----|----|----|----|----|----|----|----|----|----|----|----|----|
| 57 | Gallian (46)                         | France            | Haut-Rhin<br>departement<br>l area [DA];<br>Seine-<br>Saint-Denis<br>DA;<br>Bouches-<br>du-Rhône<br>DA;<br>Oise DA;<br>Lille | EU/<br>EEA         | No  | National   | Published | 23 Mar - 5<br>Apr  | Blood donors | Convenience | Blood donors | 998                             | 2.71%                                                                                                                                                                                                                                                                                                                                                                     | MN                                | In-house                                                                                                     | NT-Abs           | Not reported              | 100%                                                 | 6   | Mediu<br>m |    |    |    |    |    |    |    |    |    |    |    |    |    |    |    |    |    |    |    |    |    |    |    |    |    |    |
| 58 | Grzelak (118)                        | France            |                                                                                                                              | EU/<br>EEA         | No  | City/local | Published | 20-24 Mar          | Blood donors | Convenience | Blood donors | 200                             | 3%                                                                                                                                                                                                                                                                                                                                                                        | ELISA;<br>LIPS;<br>MN             | In-house;<br>In-house;<br>In-house;                                                                          | IgA; IgG;<br>IgM | Not reported              | Not reported                                         | 3   | High       |    |    |    |    |    |    |    |    |    |    |    |    |    |    |    |    |    |    |    |    |    |    |    |    |    |    |
| 59 | Fischer (119)                        | Germany           | Hesse;<br>Lower<br>Saxony;<br>North<br>Rhine-<br>Westphalia<br>Southwest                                                     | EU/<br>EEA         | Yes | National   | Published | Mar - Jun          | Blood donors | Convenience | Blood donors | 3186                            | 0.91% (0.58-1.24)                                                                                                                                                                                                                                                                                                                                                         | ELISA;<br>CLIA;<br>CMIA           | EUROIMMU<br>N;<br>Diasorin<br>Liaison;<br>Abbott<br>Laboratories<br>Epitope                                  | IgG              | 65%                       | 99-100%                                              | 4   | Mediu<br>m |    |    |    |    |    |    |    |    |    |    |    |    |    |    |    |    |    |    |    |    |    |    |    |    |    |    |
| 60 | Runkel (17)                          | Germany           |                                                                                                                              | EU/<br>EEA         | Yes | Regional   | Published | Mar - Jun          | Blood donors | Convenience | Blood donors | 3754                            | 0.40%                                                                                                                                                                                                                                                                                                                                                                     | ELISA;<br>ELISA;<br>CLIA;<br>CMIA | Diagnosics;<br>IDK5000<br>Immundiagno<br>stik AG;<br>Abbott<br>Architect;<br>Roche<br>Diagnosics<br>In-house | IgG              | Not reported              | Abbott=99.6<br>%;<br>IDK5000=9<br>9.1%;<br>EDI=96.4% | 7   | Low        |    |    |    |    |    |    |    |    |    |    |    |    |    |    |    |    |    |    |    |    |    |    |    |    |    |    |
| 61 | Percivalle<br>(120)                  | Italy             | Lombardy                                                                                                                     | EU/<br>EEA         | Yes | City/local | Published | 18 Mar - 6<br>Apr  | Blood donors | Convenience | Blood donors | 390                             | 23%                                                                                                                                                                                                                                                                                                                                                                       | MN                                |                                                                                                              | NT-Abs           | 95%                       | 100%                                                 | 6   | Mediu<br>m |    |    |    |    |    |    |    |    |    |    |    |    |    |    |    |    |    |    |    |    |    |    |    |    |    |    |
| 62 | Fiore (44)                           | Italy             | South East                                                                                                                   | EU/<br>EEA         | No  | Regional   | Published | 1-31 May           | Blood donors | Convenience | Blood donors | 904                             | 0.99%                                                                                                                                                                                                                                                                                                                                                                     | CLIA                              | Snibe Co.,<br>Ltd.                                                                                           | IgM; IgG         | IgM=78.65%;<br>IgG=91.21% | IgM=97.5%<br>;<br>IgG=97.3%<br>99.20%                | 4   | Mediu<br>m |    |    |    |    |    |    |    |    |    |    |    |    |    |    |    |    |    |    |    |    |    |    |    |    |    |    |
| 63 | Valenti (58)                         | Italy             | Milan                                                                                                                        | EU/<br>EEA         | Yes | City/local | Pre-print | 24 Feb - 8<br>Apr  | Blood donors | Convenience | Blood donors | 789                             | February/March: 2.7%<br>(95% 0.3-6.0%);<br>March/April: 5.2%<br>(2.4-9.0)§                                                                                                                                                                                                                                                                                                | LFA                               | Prima Lab                                                                                                    | IgM; IgG         | IgM=68%;<br>IgG=100%      | 10                                                   | Low |            |    |    |    |    |    |    |    |    |    |    |    |    |    |    |    |    |    |    |    |    |    |    |    |    |    |    |
| 64 | Slot (48)                            | Netherlands       |                                                                                                                              | EU/<br>EEA         | Yes | National   | Published | 1-15 Apr           | Blood donors | Convenience | Blood donors | 7361                            | 3.40%                                                                                                                                                                                                                                                                                                                                                                     | ELISA                             | Beijing<br>Wantai<br>Biological<br>Pharmacy<br>Enterprise;                                                   | IgA; IgM;<br>IgG | 100%                      | 99.1-100%                                            | 5   | Mediu<br>m |    |    |    |    |    |    |    |    |    |    |    |    |    |    |    |    |    |    |    |    |    |    |    |    |    |    |
| 65 | Lundkvist<br>(18)                    | Sweden            | Djurgårdsst<br>aden and<br>Tensta<br>(Stockholm)                                                                             | EU/<br>EEA         | Yes | City/local | Published | 17-18 Jun          | Blood donors | Random      | Blood donors | 213                             | Djurgårdsstaden:<br>4.1% (0.6-7.6%);<br>Tensta: 30.0% (20.3-<br>39.7%)                                                                                                                                                                                                                                                                                                    | LFA                               | Zhejiang<br>Orient Gene<br>Biotech                                                                           | IgM;IgG          | IgM=100%;<br>IgG=100%     | IgM=100%;<br>IgG=95.5%                               | 6   | Mediu<br>m |    |    |    |    |    |    |    |    |    |    |    |    |    |    |    |    |    |    |    |    |    |    |    |    |    |    |
| 66 | Public Health<br>England (67-<br>72) | United<br>Kingdom | England                                                                                                                      | non-<br>EU/<br>EEA | Yes | National   | Report    | 23 Mar - 3<br>Dec  | Blood donors | Convenience | Blood donors | 1000<br>samples/week/<br>region | 6 May - 29 May: 8.3 (7.5-<br>9.2)<br>4 June - 29 June: 7.6 (6.9-<br>8.4)<br>29 June - 28 July: 5.9 (5.3-<br>6.5)<br>20 July - 16 August: 5.5<br>(4.9-6.1);<br>13 August - 6 September:<br>5.8 (5.1-6.4);<br>24 August - 18 September:<br>6.1 (5.4 - 6.8);<br>21 October - 13 November:<br>6.0% (5.4 - 6.6);<br>16 November- 13<br>December: 6.9% (6.3 - 7.6) <sup>§</sup> | ELISA                             | EUROIMMU<br>N                                                                                                | IgG              | 79%                       | 99%                                                  | 4   | Mediu<br>m |    |    |    |    |    |    |    |    |    |    |    |    |    |    |    |    |    |    |    |    |    |    |    |    |    |    |
| 67 | Thompson<br>(121)                    | United<br>Kingdom | Scotland                                                                                                                     | non-<br>EU/<br>EEA | Yes | National   | Published | 17 Mar - 18<br>May | Blood donors | Convenience | Blood donors | 3500                            | 3.17%                                                                                                                                                                                                                                                                                                                                                                     | CLIA;<br>CMIA                     | Abbott<br>Laboratories;                                                                                      | IgM; IgG         | 94.1%                     | 100%                                                 | 8   | Low        |    |    |    |    |    |    |    |    |    |    |    |    |    |    |    |    |    |    |    |    |    |    |    |    |    |    |



|    |                                                   |                        |                |                              |            |          |            |                |                 |                    |              |                                                  |                                                                                |                                                                                                                               |                   |                                           |               |                              |                               |   |        |
|----|---------------------------------------------------|------------------------|----------------|------------------------------|------------|----------|------------|----------------|-----------------|--------------------|--------------|--------------------------------------------------|--------------------------------------------------------------------------------|-------------------------------------------------------------------------------------------------------------------------------|-------------------|-------------------------------------------|---------------|------------------------------|-------------------------------|---|--------|
| 68 | Public Health Scotland (64)                       | United Kingdom         | Scotland       | EU/EEA                       | Yes        | National | Report     | 29 Jun - 9 Aug | Blood donors    | Convenience        | Blood donors | 3220                                             | 3.1% (2.5%, 3.8%)                                                              | Not reported                                                                                                                  | Not reported      | Not reported                              | Not reported  | 5                            | Medium                        |   |        |
| 1  | <b>Patients seeking healthcare (non-COVID-19)</b> |                        |                |                              |            |          |            |                |                 |                    |              |                                                  |                                                                                |                                                                                                                               |                   |                                           |               |                              |                               |   |        |
| 2  | 69                                                | Fogel (122)            | France         | Paris                        | EU/EEA     | No       | City/local | Published      | 1 Jun - 31 Aug  | General population | Convenience  | Patients seeking care (non-COVID-19)             | 249                                                                            | 2.8%                                                                                                                          | CMIA              | Abbott Laboratories                       | IgG           | Not reported                 | Not reported                  | 2 | High   |
| 3  | 70                                                | Choi (123)             | Germany        | Berlin                       | EU/EEA     | No       | City/local | Published      | 19 Mar - 19 May | General population | Convenience  | Patients seeking care (non-COVID-19)             | 223                                                                            | 7.20%                                                                                                                         | ELISA; IFIT; PRNT | EUROIMMUN; In house; In house             | IgA; IgG      | Not reported                 | Not reported                  | 1 | High   |
| 4  | 71                                                | Rauber (124)           | Germany        | Heidelberg                   | EU/EEA     | No       | City/local | Published      | 5 May - 8 Jun   | General population | Convenience  | Patients seeking care (non-COVID-19)             | 219                                                                            | 3.2%                                                                                                                          | ELISA             | EUROIMMUN                                 | IgG           | 94.6%                        | 99.8%                         | 1 | High   |
| 5  | 72                                                | Zambelli (29)          | Italy          | Bergamo                      | EU/EEA     | No       | City/local | Published      | 1-30 Apr        | General population | Convenience  | Patients seeking care (non-COVID-19)             | 560                                                                            | 31%                                                                                                                           | LFA               | Moers                                     | IgM; IgG      | Not reported                 | Not reported                  | 2 | High   |
| 6  | 73                                                | Medas (125)            | Italy          | Cagliari                     | EU/EEA     | No       | City/local | Published      | 31 Mar - 30 Jun | General population | Convenience  | Patients seeking care (non-COVID-19)             | 86                                                                             | 5.8%                                                                                                                          | CLIA              | Snibe Co., Ltd                            | IgM; IgG      | Not reported                 | Not reported                  | 1 | High   |
| 7  | 74                                                | Capasso (126)          | Italy          | Campania Region              | EU/EEA     | No       | Regional   | Published      | 11 May - 15 Jun | General population | Convenience  | Patients seeking care (non-COVID-19)             | 310                                                                            | 2.90%                                                                                                                         | LFA               | Shanghai Kehua LFAI                       | IgM; IgG      | 66%                          | 96.60%                        | 4 | Medium |
| 8  | 75                                                | Cento (127)            | Italy          | Milan                        | EU/EEA     | No       | City/local | Published      | 11 May - 5 Jul  | General population | Convenience  | Patients seeking care (non-COVID-19)             | 2753                                                                           | 5.1% (4.3%-6.0%)                                                                                                              | CLIA; CLIA        | Abbott Laboratories DiaSorin Liaison      | IgG           | 84.2-100%                    | 99.6-100%                     | 4 | Medium |
| 9  | 76                                                | Berte (128)            | Italy; Germany | Milan and Cagliari; Erlangen | EU/EEA     | No       | Regional   | Published      | Apr - Jun       | General population | Convenience  | Patients seeking care (non-COVID-19)             | 354; Milan, Italy: 129; Cagliari, Italy: 48; Erlangen, Germany: 177            | 2.3% (0.8- 3.8)                                                                                                               | ELISA             | In house                                  | IgA; IgG      | IgA=71.4%; IgG=97.64%        | IgA=99.8%; IgG=95.2%          | 4 | Medium |
| 10 | 77                                                | Vena (45)              | Italy          | Liguria; Lombardia           | EU/EEA     | No       | Regional   | Published      | Mar - Apr       | General population | Convenience  | Patients seeking care (non-COVID-19)             | 3609                                                                           | 11% (10.0-12.1)                                                                                                               | CLIA; LFA; LFA    | MaglumiTM; Realy tech; Biosynex BSS       | IgM; IgG      | IgM=78.6-100%; IgG=90.6-100% | IgM=88.7-97.5%; IgG=90.6-100% | 4 | Medium |
| 11 | 78                                                | Cabezón-Gutiérrez (30) | Spain          | Madrid                       | EU/EEA     | No       | City/local | Published      | 29 May - 19 Jun | General population | Convenience  | Patients seeking care (non-COVID-19)             | 229                                                                            | 31.40%                                                                                                                        | LFA               | Hangzhou Testsea Biotechnology            | IgM; IgG      | IgM=88%; IgG=96%             | IgM=100%; IgG=100%            | 4 | Medium |
| 12 | 79                                                | Prados (129)           | Spain          |                              | EU/EEA     | No       | National   | Published      | 27 Apr - 26 Jun | General population | Convenience  | Patients seeking care (non-COVID-19)             | 6140                                                                           | 0.70%                                                                                                                         | ELISA             | EDI Epitope Diagnostics                   | IgM; IgG      | Not reported                 | Not reported                  | 3 | High   |
| 13 | 80                                                | Clarke (28)            | United Kingdom | London                       | non-EU/EEA | No       | City/local | Published      | 27 Apr - 7 May  | General population | Convenience  | Patients seeking care (non-COVID-19)             | 356                                                                            | 36.2%                                                                                                                         | CMIA              | Abbott Laboratories                       | IgG           | Not reported                 | Not reported                  | 3 | High   |
| 14 | 81                                                | Prendecki (130)        | United Kingdom | London                       | non-EU/EEA | No       | City/local | Published      | 1-30 Jun        | General population | Convenience  | Patients seeking care (non-COVID-19)             | 855                                                                            | 8.1% (95% CI 6.4 to 10.1); 10.4% (8.5 - 12.6%) CMIA + LFA results                                                             | CMIA; LFA         | Abbott Laboratories; Fortress Diagnostics | IgG           | 90.6%; 96.5%                 | Not reported                  | 4 | Medium |
| 15 | <b>Pregnant or parturient women</b>               |                        |                |                              |            |          |            |                |                 |                    |              |                                                  |                                                                                |                                                                                                                               |                   |                                           |               |                              |                               |   |        |
| 16 | 82                                                | Egerup (19)            | Denmark        | Copenhagen                   | EU/EEA     | No       | City/local | Published      | 4 Apr - 3 Jul   | General population | Convenience  | Pregnant or parturient women; Partners; Newborns | Total: 3707; Pregnant or parturient women: 1313 Partners: 1188; Newborns: 1206 | Pregnant or parturient women: 2.6% (1.7-4.0) <sup>§</sup> Partners: 3.5% (2.3 - 5.1) <sup>§</sup> Newborns: 1.4% <sup>§</sup> | CLIA              | Shenzhen Yhlo Biotech                     | IgM; IgG      | IgM=42%; IgG=94%             | IgM=99.7%; IgG=99.3%          | 7 | Low    |
| 17 | 83                                                | Mattern (20)           | France         | Paris                        | EU/EEA     | Yes      | City/local | Published      | 4-31 May        | General population | Convenience  | Pregnant or parturient women                     | 249                                                                            | 8%                                                                                                                            | CMIA              | Abbott Laboratories                       | IgG           | Not reported                 | Not reported                  | 3 | High   |
| 18 | 84                                                | Tsatsaris (21)         | France         | Paris                        | EU/EEA     | Yes      | City/local | Published      | 29 Apr - 26 Jun | General population | Convenience  | Pregnant or parturient women                     | 529                                                                            | 4.7% (3.0-6.7%)                                                                                                               | CMIA              | Abbott Laboratories                       | IgG           | 92.7 - 97.3 %                | >99%                          | 3 | High   |
| 19 | 85                                                | Cosma (22)             | Italy          | Turin4/6/20 20               | EU/EEA     | No       | City/local | Published      | 16 Apr - 4 Jun  | General population | Convenience  | Pregnant or parturient women                     | 138                                                                            | 5.80%                                                                                                                         | CLIA; LFA; LFA    | DiaSorin Liaison; Boditech; AFIAS         | IgM; IgG      | Not reported                 | Not reported                  | 2 | High   |
| 20 | 86                                                | Crovetto (23)          | Spain          | Madrid                       | EU/EEA     | Yes      | City/local | Pre-print      | 14 Apr - 5 May  | General population | Convenience  | Pregnant or parturient women                     | 874                                                                            | 14.3%                                                                                                                         | CLIA              | Vircell                                   | IgA; IgM; IgG | IgM/IgA=89 %; IgG=70%        | IgM/IgA=99 %; IgG=89%         | 2 | High   |
| 21 | 87                                                | Villalain(24)          | Spain          | Madrid                       | EU/EEA     | No       | City/local | Published      | 28 Feb - 10 May | General population | Convenience  | Pregnant or parturient women                     | 769                                                                            | 11.2%                                                                                                                         | ELISA             | In house                                  | IgG           | Not reported                 | Not reported                  | 2 | High   |

| 88                                | Lumley (425) | United Kingdom    | Oxford              | non-EU/EEA                                    | Yes        | City/local | Published  | 14 Apr - 15 Jun   | General population               | Convenience | Pregnant or partner with women | 1000                                      | 5.3% (4.0-6.9)   | CLIA                                                 | In house            | IgG                                                      | 99.1%         | 99%                   | 4                    | Medium |        |
|-----------------------------------|--------------|-------------------|---------------------|-----------------------------------------------|------------|------------|------------|-------------------|----------------------------------|-------------|--------------------------------|-------------------------------------------|------------------|------------------------------------------------------|---------------------|----------------------------------------------------------|---------------|-----------------------|----------------------|--------|--------|
| <b>Other/Multiple populations</b> |              |                   |                     |                                               |            |            |            |                   |                                  |             |                                |                                           |                  |                                                      |                     |                                                          |               |                       |                      |        |        |
| 1                                 | 89           | Kráták (131)      | Czech Republic      | Stratonic; Pisek                              | EU/EEA     | No         | Regional   | Published         | 4-15 May                         | Other       | Not reported                   | Employees                                 | 2011             | Stratonic 2.9%; Pisek 1.9%                           | ELISA               | EUROIMMUN                                                | IgA; IgG      | IgA=98.6%; IgG=94.4%  | IgA=92%; IgG=99.6%   | 5      | Medium |
| 2                                 |              |                   |                     |                                               |            |            |            |                   |                                  |             |                                |                                           |                  |                                                      |                     |                                                          |               |                       |                      |        |        |
| 3                                 |              |                   |                     |                                               |            |            |            |                   |                                  |             |                                |                                           |                  |                                                      |                     |                                                          |               |                       |                      |        |        |
| 4                                 | 90           | Jerkovic (132)    | Croatia             | Split-Dalmatia; Sibenik-Knin County           | EU/EEA     | No         | Regional   | Published         | 23-28 Apr                        | Other       | Convenience                    | Employees - voluntary                     | 1494             | 1.27% (0.8-2.0%)                                     | LFA                 | AMP Diagnostics                                          | IgM; IgG      | IgM=95.7%; IgG: 91.8% | IgM=97.3%; IgG=96.4% | 6      | Medium |
| 5                                 |              |                   |                     |                                               |            |            |            |                   |                                  |             |                                |                                           |                  |                                                      |                     |                                                          |               |                       |                      |        |        |
| 6                                 |              |                   |                     |                                               |            |            |            |                   |                                  |             |                                |                                           |                  |                                                      |                     |                                                          |               |                       |                      |        |        |
| 7                                 | 91           | Vince (51)        | Croatia             |                                               | EU/EEA     | No         | National   | Pre-print         | 20 May - 31 Jul                  | Other       | Convenience                    | Football players                          | 305              | 20%                                                  | ELISA               | EUROIMMUN                                                | IgA; IgG      | Not reported          | Not reported         | 2      | High   |
| 8                                 | 92           | Anna (133)        | France              | Ile-de-France; Paris; Saint-Cloud; Orsay      | EU/EEA     | No         | City/local | Published         | 28 Apr - 31 Jul                  | Other       | Convenience                    | Employees - voluntary                     | 1847             | 11.6%                                                | LuLISA; MN          | In-house; In-house                                       | IgG           | Not reported          | 98%                  | 6      | Medium |
| 9                                 |              |                   |                     |                                               |            |            |            |                   |                                  |             |                                |                                           |                  |                                                      |                     |                                                          |               |                       |                      |        |        |
| 10                                |              |                   |                     |                                               |            |            |            |                   |                                  |             |                                |                                           |                  |                                                      |                     |                                                          |               |                       |                      |        |        |
| 11                                | 93           | Fontanet (52)     | France              | Oise                                          | EU/EEA     | No         | City/local | Published^        | 30 Mar - 4Apr; 28 Mar - 30 Apr   | Other       | Convenience                    | HH/C samples; High school; Primary school | 664<br>1340      | 25%; 10%                                             | ELISA; S-flow LIPS; | In-house; In-house; In-house                             | IgG           | 99.4%                 | >99%                 | 8      | Low    |
| 12                                |              |                   |                     |                                               |            |            |            |                   |                                  |             |                                |                                           |                  |                                                      |                     |                                                          |               |                       |                      |        |        |
| 13                                | 94           | Roederer (16)     | France              | Paris                                         | EU/EEA     | No         | City/local | Published^        | 23 Jun - 2 Jul                   | Other       | Convenience                    | Persons experiencing homelessness         | 818              | 52%                                                  | LuLISA* ; MN        | In-house                                                 | IgG           | Not reported          | 97-100%              | 9      | Low    |
| 14                                |              |                   |                     |                                               |            |            |            |                   |                                  |             |                                |                                           |                  |                                                      |                     |                                                          |               |                       |                      |        |        |
| 15                                | 95           | Krähling (134)    | Germany             | Frankfurt am Main                             | EU/EEA     | No         | City/local | Pre-print         | 6-14 Apr                         | Other       | Convenience                    | Employees                                 | 998              | 2.90%                                                | ELISA               | In-house                                                 | IgG           | 87.2-100%             | 99.2%                | 4      | Medium |
| 16                                | 96           | Mack (60)         | Germany             |                                               | EU/EEA     | No         | National   | Published         | May; June                        | Other       | Convenience                    | Professional football teams               | 1184             | May: 1.99% (1.33-2.97); June: 2.09% (1.37-3.17);     | ELISA; CLIA         | EUROIMMUN; Roche Diagnostics                             | IgG           | Not reported          | Not reported         | 3      | High   |
| 17                                |              |                   |                     |                                               |            |            |            |                   |                                  |             |                                |                                           |                  |                                                      |                     |                                                          |               |                       |                      |        |        |
| 18                                | 97           | Ceban (135)       | Republic of Moldova |                                               | non EU/EEA | Yes        | National   | Not yet published | 17 Nov 2020 - 15 Jan 2021        | Other       | Random                         | Hospital visitors                         | 5656             | 48.4%                                                | ELISA               | Beijing Wantai Biological Pharmacy Enterprise            | Total Ab      | Not reported          | Not reported         | N/A    | N/A    |
| 19                                |              |                   |                     |                                               |            |            |            |                   |                                  |             |                                |                                           |                  |                                                      |                     |                                                          |               |                       |                      |        |        |
| 20                                |              |                   |                     |                                               |            |            |            |                   |                                  |             |                                |                                           |                  |                                                      |                     |                                                          |               |                       |                      |        |        |
| 21                                | 98           | Gujski (136)      | Poland              | Mazowieckie Province                          | EU/EEA     | No         | Regional   | Published         | 22 Jun - 8 Jul                   | Other       | Random                         | Employees                                 | 5082             | 4.30%                                                | ELISA               | Vircell                                                  | IgA; IgM; IgG | 65% - 97%             | 82% - 96%            | 3      | High   |
| 22                                | 99           | Pérez-García (55) | Spain               | Madrid                                        | EU/EEA     | No         | City/local | Published         | 5 Mar - 30 May                   | Other       | Convenience                    | Employees                                 | 2963             | 22.40%                                               | LFA                 | AllTest Biotech                                          | IgM; IgG      | 88%                   | 100%                 | 4      | Medium |
| 23                                |              |                   |                     |                                               |            |            |            |                   |                                  |             |                                |                                           |                  |                                                      |                     |                                                          |               |                       |                      |        |        |
| 24                                | 100          | Ulyte (73)        | Switzerland         | Canton of Zurich                              | non-EU/EEA | No         | Regional   | Published^        | 16 Jun - 9 Jul; 26 Oct - 19 Nov  | Other       | Random                         | School children                           | 5155; 2603; 2552 | 7.8% (6.2% to 9.5%); 2.4% (1.4-3.5); 4.5% (3.2-6.0); | ELISA               | In-house                                                 | IgA; IgM; IgG | 93.3-94.3%            | 99-99.6%             | 6      | Medium |
| 25                                |              |                   |                     |                                               |            |            |            |                   |                                  |             |                                |                                           |                  |                                                      |                     |                                                          |               |                       |                      |        |        |
| 26                                | 101          | Roarty (137)      | United Kingdom      | Belfast; Cardiff; Glasgow; London; Manchester | non-EU/EEA | No         | National   | Published         | 26 Jun - 15 Aug                  | Other       | Convenience                    | Children of employees                     | 849              | 7.66% (6.05-9.64)                                    | CLIA; CLIA          | Elecsys Roche; DiaSorin Liaison                          | IgG           | 84%; 64%              | 100%; 98%            | 4      | Medium |
| 27                                |              |                   |                     |                                               |            |            |            |                   |                                  |             |                                |                                           |                  |                                                      |                     |                                                          |               |                       |                      |        |        |
| 28                                |              |                   |                     |                                               |            |            |            |                   |                                  |             |                                |                                           |                  |                                                      |                     |                                                          |               |                       |                      |        |        |
| 29                                |              |                   |                     |                                               |            |            |            |                   |                                  |             |                                |                                           |                  |                                                      |                     |                                                          |               |                       |                      |        |        |
| 30                                | 102          | Waterfield (138)  | United Kingdom      | Belfast; London; Glasgow; Manchester; Cardiff | non-EU/EEA | No         | National   | Published         | 16 Apr - 3 Jul                   | Other       | Convenience                    | Children of employees                     | 992              | 6.9% (5.4 - 8.6)                                     | CLIA; CMIA          | Abbott Laboratories; Roche Diagnostics; DiaSorin Liaison | IgG           | 64-94%                | 98-100%              | 4      | Medium |
| 31                                |              |                   |                     |                                               |            |            |            |                   |                                  |             |                                |                                           |                  |                                                      |                     |                                                          |               |                       |                      |        |        |
| 32                                |              |                   |                     |                                               |            |            |            |                   |                                  |             |                                |                                           |                  |                                                      |                     |                                                          |               |                       |                      |        |        |
| 33                                |              |                   |                     |                                               |            |            |            |                   |                                  |             |                                |                                           |                  |                                                      |                     |                                                          |               |                       |                      |        |        |
| 34                                | 103          | Armann (59)       | Germany             | Eastern Saxony                                | EU/EEA     | No         | Regional   | Pre-print         | 25 May - 30 Jun; 15 Sept- 13 Oct | Other       | Convenience                    | Teachers and students                     | 1779             | 0.6%; 0.6%                                           | ELISA; CLIA; CMIA   | EUROIMMUN; Diasorin Liaison; Abbott Laboratories         | IgG           | 97.6%                 | 99.3%                | 7      | Low    |
| 35                                |              |                   |                     |                                               |            |            |            |                   |                                  |             |                                |                                           |                  |                                                      |                     |                                                          |               |                       |                      |        |        |
| 36                                |              |                   |                     |                                               |            |            |            |                   |                                  |             |                                |                                           |                  |                                                      |                     |                                                          |               |                       |                      |        |        |
| 37                                | 104          | Reisinger (139)   | Germany             | Rostock                                       | EU/EEA     | No         | City/local | Published         | 22-29 Apr                        | Other       | Convenience                    | Children and mothers                      | 401              | 2.90%                                                | ELISA               | EUROIMMUN                                                | IgA; IgG      | Not reported          | Not reported         | 3      | High   |
| 38                                | 105          | Tsitsilonis (42)  | Greece              | Athens                                        | EU/EEA     | No         | City/local | Published         | 15 Jun - 15 Jul                  | Other       | Convenience                    | Employees and students                    | 2500             | 0.93% (0.27, 2.09) <sup>3</sup>                      | CLIA                | Roche Diagnostics                                        | Total Abs     | 100%                  | 99.81%               | 5      | Medium |
| 39                                |              |                   |                     |                                               |            |            |            |                   |                                  |             |                                |                                           |                  |                                                      |                     |                                                          |               |                       |                      |        |        |
| 40                                | 106          | Lastucci (140)    | Italy               | Prato                                         | EU/EEA     | No         | Regional   | Published         | 1 May - 31 May                   | Multiple    | Random                         | Work-from-home; Support service           | 1828             | 1% (0.3-2.0); 1.4% (0.7-2.2)                         | LFA                 | Hangzhou Laihe Biotech                                   | IgM; IgG      | Not reported          | Not reported         | 2      | High   |
| 41                                |              |                   |                     |                                               |            |            |            |                   |                                  |             |                                |                                           |                  |                                                      |                     |                                                          |               |                       |                      |        |        |
| 42                                |              |                   |                     |                                               |            |            |            |                   |                                  |             |                                |                                           |                  |                                                      |                     |                                                          |               |                       |                      |        |        |
| 43                                |              |                   |                     |                                               |            |            |            |                   |                                  |             |                                |                                           |                  |                                                      |                     |                                                          |               |                       |                      |        |        |
| 44                                |              |                   |                     |                                               |            |            |            |                   |                                  |             |                                |                                           |                  |                                                      |                     |                                                          |               |                       |                      |        |        |
| 45                                |              |                   |                     |                                               |            |            |            |                   |                                  |             |                                |                                           |                  |                                                      |                     |                                                          |               |                       |                      |        |        |
| 46                                |              |                   |                     |                                               |            |            |            |                   |                                  |             |                                |                                           |                  |                                                      |                     |                                                          |               |                       |                      |        |        |
| 47                                |              |                   |                     |                                               |            |            |            |                   |                                  |             |                                |                                           |                  |                                                      |                     |                                                          |               |                       |                      |        |        |

1  
2  
3  
4  
5  
6  
7  
8  
9  
10  
11  
12  
13  
14  
15  
16  
17  
18  
19  
20  
21  
22  
23  
24  
25  
26  
27  
28  
29  
30  
31  
32  
33  
34  
35  
36  
37  
38  
39  
40  
41  
42  
43  
44  
45  
46  
47

|     |                 |                |                  |            |     |            |                        |                           |          |             |                                                     |                                                                  |                                                                                                                                        |                                                |                             |          |                                                                                                                                                     |                                                                                                                                                          |      |        |
|-----|-----------------|----------------|------------------|------------|-----|------------|------------------------|---------------------------|----------|-------------|-----------------------------------------------------|------------------------------------------------------------------|----------------------------------------------------------------------------------------------------------------------------------------|------------------------------------------------|-----------------------------|----------|-----------------------------------------------------------------------------------------------------------------------------------------------------|----------------------------------------------------------------------------------------------------------------------------------------------------------|------|--------|
| 107 | Soriano (141)   | Spain          | Madrid           | EU/EEA     | Yes | City/local | Published              | 27 Apr - 17 May           | Multiple | Convenience | University staff, family members, community         | 674                                                              | 13.8%                                                                                                                                  | LFA                                            | PCL Inc                     | IgM; IgG | Not reported                                                                                                                                        | Not reported                                                                                                                                             | High |        |
| 108 | Montenegro (31) | Spain          | Barcelona        | EU/EEA     | No  | City/local | Published              | 21-24 Apr; 29 Apr - 6 May | Multiple | Random      | HH/C samples; Patients seeking care (non-COVID-19)  | 311; 634                                                         | 5.47% (3.44-8.58); 38.49% (34.78%-42.33%)                                                                                              | LFA; LFA; LFA                                  | Livzon; Lysine; Sure Screen | IgM; IgG | Livzon=91.2%; Lysine=98.6%; SureScreen=91%                                                                                                          | Not reported                                                                                                                                             | 9    | Low    |
| 109 | Emmenegger (27) | Switzerland    | Canton of Zurich | non-EU/EEA | Yes | Regional   | Pre-print              | Mar - Jul                 | Multiple | Convenience | Blood donors; Patients seeking care (non-COVID-19); | Total: 33932; Blood donor cohort: 9,102; Patient cohort: 24,830; | BDS cohort <sup>†</sup> : April: 1.2%; May: 1.6%; July: 0.7%; Patient cohort <sup>†</sup> : March: 0.3%; April: 1.4%; May -July: 0.9%; | Tripartite Automated Blood Immunoassay (TRABI) | In house                    | IgG      | 100%                                                                                                                                                | 100%                                                                                                                                                     | 5    | Medium |
| 110 | Dopico (26)     | Sweden         | Stockholm        | EU/EEA     | No  | City/local | Published <sup>^</sup> | 4 Mar - 11 Dec            | Multiple | Convenience | Blood donors; Pregnant women                        | 2600, 2500                                                       | 14.8% (12.2-18.0)                                                                                                                      | ELISA                                          | In house                    | IgG      | Spike 3SD:100% (95% CI [97.5-100.0]); Spike 6SD:100% (95% CI [97.5-100.0]); RBD 3SD:100% (95% CI [97.5-100.0]); RBD 6SD:98.0% (95% CI [94.2-99.3]); | Spike 3SD: 99.0% (95% CI [98.6-99.0]); Spike 6SD: 99.9% (95% CI [99.6-100.0]); RBD 3SD: 99.0% (95% CI [98.4-99.4]); RBD 6SD: 99.9% (95% CI [99.6-100.0]) | 5    | Medium |
| 111 | Davis (142)     | United Kingdom | London           | non-EU/EEA | No  | City/local | Pre-print              | Jun                       | Other    | Convenience | University staff and students                       | 1882                                                             | 6.6% (5.6-7.8)                                                                                                                         | LFA                                            | SureScreen                  | IgM; IgG | 89%                                                                                                                                                 | 100%                                                                                                                                                     | 4    | Medium |

\* LuLISA: Luciferase Linked Immunosorbent Assay  
<sup>^</sup> Initially reported to WHO EURO and ECDC in 2020 or in pre-print form and since published

1  
2  
3  
4  
5  
6  
7  
8  
9  
10  
11  
12  
13  
14  
15  
16  
17  
18  
19  
20  
21  
22  
23  
24  
25  
26  
27  
28  
29  
30  
31  
32  
33  
34  
35  
36  
37  
38  
39  
40  
41  
42  
43  
44  
45  
46

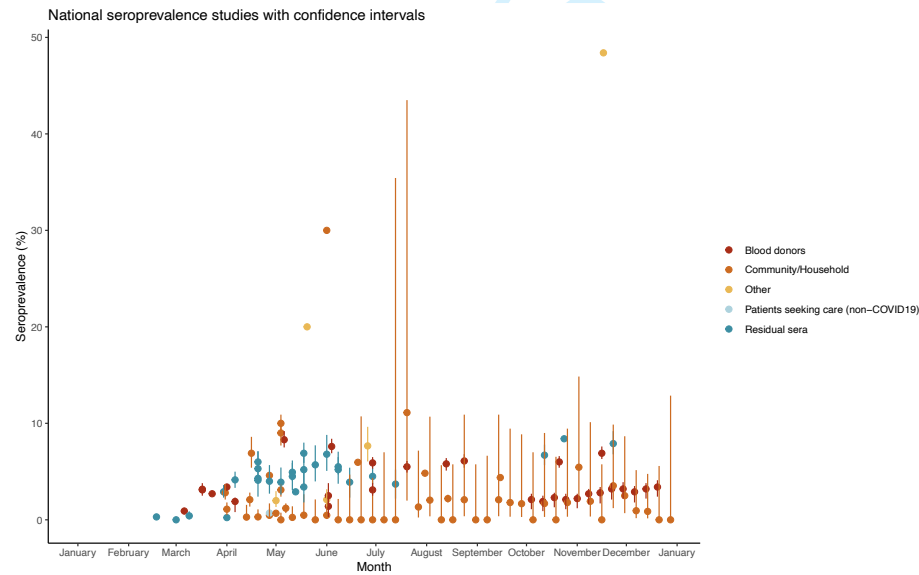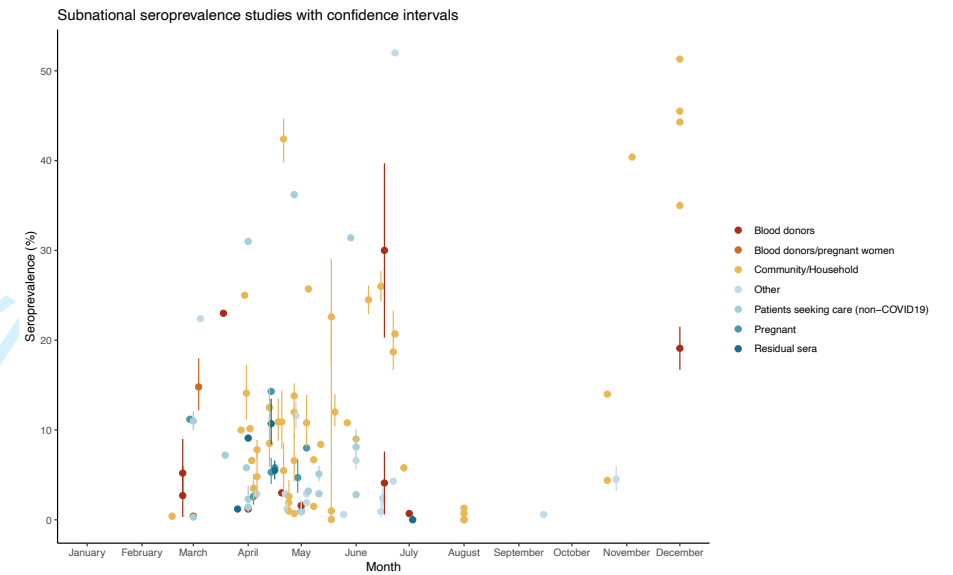

1  
2  
3  
4  
5  
6  
7  
8  
9  
10  
11  
12  
13  
14  
15  
16  
17  
18  
19  
20  
21  
22  
23  
24  
25  
26  
27  
28  
29  
30  
31  
32  
33  
34  
35  
36  
37  
38  
39  
40  
41  
42  
43  
44  
45  
46

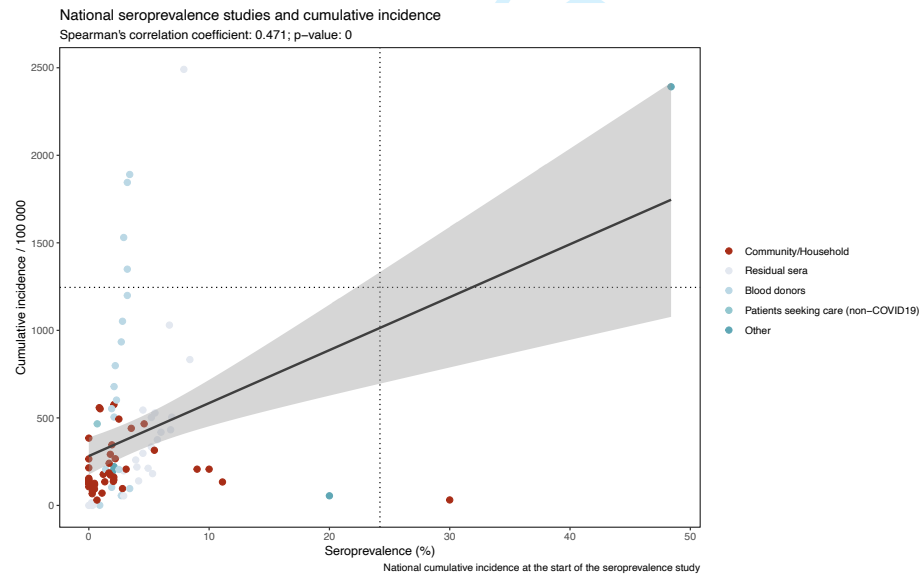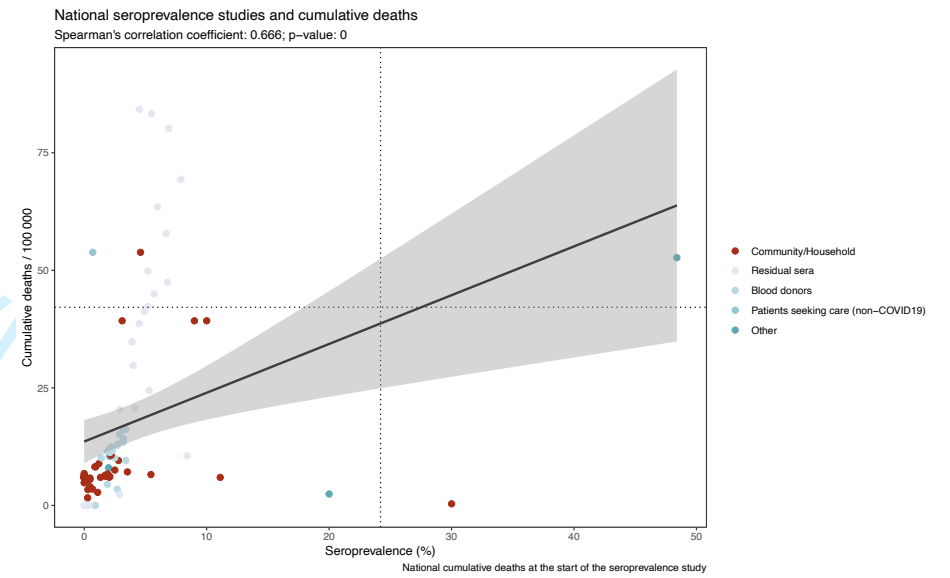

## Supplementary Material

### S1 Supplementary Methods

#### S1.1 Search strategy and selection criteria

We searched the WHO “COVID-19 Global literature on coronavirus disease” database (MEDLINE, ELSEVIER and the pre-print servers medRxiv and bioRxiv) (100) using search terms that included a range of criteria relating to seroprevalence surveys. The search terms and inclusion and exclusion criteria are described below (Table S1).

#### S1.2 Search terms

ti:sero\$urv\* or ti:serosurv\* or ti:seroepidemiolog\* or ti:sero\$epidemiolog\* or ti:serolog\* or ti:seropositiv\* or ti:seropositiv\* or ti:serosurveillance or ti:sero\$surveillance or ti:seroprevalence or ti:sero\$prevalence or ti:antibody or ti:antibodies or ti:immunity or ti:immunoglobulin OR ab:sero\$urv\* or ab:serosurv\* or ab:seroepidemiolog\* or ab:sero\$epidemiolog\* or ab:serolog\* or ab:seropositiv\* or ab:sero\$positiv\* or ab:serosurveillance or ab:sero\$surveillance or ab:seroprevalence or ab:sero\$prevalence

**Table S1 Inclusion and exclusion criteria**

| <b>Characteristics</b>       | <b>Inclusion criteria</b>                                                   | <b>Exclusion criteria</b>                                                                                                                                                                                                                                                                                   |
|------------------------------|-----------------------------------------------------------------------------|-------------------------------------------------------------------------------------------------------------------------------------------------------------------------------------------------------------------------------------------------------------------------------------------------------------|
| <b>Type of evidence</b>      | Published or unpublished scientific literature                              | Media reports (e.g. news items and press releases), reviews, assessed performance of a test, protocols                                                                                                                                                                                                      |
|                              | Completed or ongoing serosurveys                                            | Unrelated to seroprevalence                                                                                                                                                                                                                                                                                 |
|                              | Report seroprevalence estimates from one or multiple time points            |                                                                                                                                                                                                                                                                                                             |
| <b>Population</b>            | Cross-sectional and cohort study designs                                    | Case-control studies, case reports or reviews                                                                                                                                                                                                                                                               |
|                              | Studies of human participants, any age                                      | Studies of non-human participants (i.e. animal studies)                                                                                                                                                                                                                                                     |
|                              | Population groups considered to be representative of the general population | Population groups considered to be unrepresentative of the general population as they had higher risk of infection (e.g. healthcare workers and other high-risk groups).<br>Studies only of individuals with suspected (e.g. respiratory symptoms) or confirmed SARS-CoV-2 (RT-PCR laboratory confirmation) |
| <b>Geographical location</b> | WHO European region                                                         | Outside of WHO European Region                                                                                                                                                                                                                                                                              |
| <b>Languages</b>             | Any language                                                                | N/A                                                                                                                                                                                                                                                                                                         |



**Table S2: Description of the quality assessment criteria used**

| <b>Risk of bias criteria</b>                                                                                  | <b>Risk of bias assessment</b>                                                                                     | <b>Risk of bias scoring</b> |
|---------------------------------------------------------------------------------------------------------------|--------------------------------------------------------------------------------------------------------------------|-----------------------------|
| <b>Sampling frame: Representative of general population?</b>                                                  | Poor (e.g hospital admissions, GP visits, pregnant women, employees)                                               | 0                           |
|                                                                                                               | Weak (eg. blood donors)                                                                                            | 1                           |
|                                                                                                               | Good (e.g household sampling)                                                                                      | 2                           |
| <b>Sampling frame: Age profile included?</b>                                                                  | Does not cover those in target population (e.g study of 'all ages' excludes elderly or children)                   | 0                           |
|                                                                                                               | Study includes all those in target population                                                                      | 1                           |
|                                                                                                               | Includes all ages (including children)                                                                             | 2                           |
| <b>Sampling method: Were study participants sampled appropriate?</b>                                          | Non-random/non-exhaustive (including convenience sampling)                                                         | 0                           |
|                                                                                                               | Exhaustive                                                                                                         | 1                           |
|                                                                                                               | Random                                                                                                             | 2                           |
| <b>Sample size: Is sample size calculation described in methods?</b>                                          | Unclear                                                                                                            | 0                           |
|                                                                                                               | Yes                                                                                                                | 1                           |
| <b>Sample size: Was the sample size adequate?</b>                                                             | If at least 300 samples in the study then adequate OR if at least 100 samples per age group (if stratified by age) | 1                           |
|                                                                                                               | If NONE of above OR no mention in methods/unclear                                                                  | 0                           |
|                                                                                                               |                                                                                                                    |                             |
| <b>Test method: Use of more than one assays/test?</b>                                                         | Yes                                                                                                                | 1                           |
|                                                                                                               | No                                                                                                                 | 0                           |
| <b>Test method 1: Are tests sufficiently accurate? (no clinical validation)</b>                               | Sensitivity/specificity acceptable* (i.e ELISA: Sn $\geq$ 95%, Sp $>$ 97% OR POCT: Sn $\geq$ 90%, Sp $>$ 97%)      | 1                           |
|                                                                                                               | Sensitivity/specificity not acceptable (i.e ELISA: Sn $<$ 95%, Sp $<$ 97% OR POCT: Sn $<$ 90%, Sp $<$ 97%)         | 0                           |
| <b>Test method 2: Use of commercial tests with clinical validation?</b>                                       | Sensitivity/specificity acceptable* (i.e ELISA: Sn $\geq$ 95%, Sp $>$ 97% OR POCT: Sn $\geq$ 90%, Sp $>$ 97%)      | 2                           |
|                                                                                                               | Sensitivity/specificity not acceptable (i.e ELISA: Sn $<$ 95%, Sp $<$ 97% OR POCT: Sn $<$ 90%, Sp $<$ 97%)         | 1                           |
| <b>Test method 3: Use of in-house assay</b>                                                                   | Sensitivity/specificity acceptable* (i.e ELISA: Sn $\geq$ 95%, Sp $>$ 97% OR POCT: Sn $\geq$ 90%, Sp $>$ 97%)      | 2                           |
|                                                                                                               | Sensitivity/specificity not acceptable (i.e ELISA: Sn $<$ 95%, Sp $<$ 97% OR POCT: Sn $<$ 90%, Sp $<$ 97%)         | 1                           |
|                                                                                                               | No results reported                                                                                                | 0                           |
| <b>Data analysis: Were the results adjusted according to sensitivity/specificity of the serological test?</b> | Yes and Confidence intervals presented                                                                             | 2                           |
|                                                                                                               | Yes but no Confidence intervals presented                                                                          | 1                           |
|                                                                                                               | No/Unclear                                                                                                         | 0                           |
| <b>Overall risk of bias</b>                                                                                   | <b>High risk of bias</b>                                                                                           | <b>1-3</b>                  |
|                                                                                                               | <b>Moderate risk of bias</b>                                                                                       | <b>4-6</b>                  |
|                                                                                                               | <b>Low-risk bias</b>                                                                                               | <b><math>&gt;</math>6</b>   |

1  
2  
3 **S2 Supplementary Figures**  
4  
5

6 **Supplementary figure S1 Forest plot of the seroprevalence of SARS-CoV-2 antibodies in**  
7 **Community/Household samples with corresponding 95% confidence intervals in WHO**  
8 **European Region (1/1/2020-31/12/2020)**  
9

10  
11 See PDF file attached separately  
12

13 **Supplementary figure S2: Forest plot of the seroprevalence of SARS-CoV-2 antibodies in (Top**  
14 **to bottom, Left to Right) a) Residual sera b) Blood donors c) Pregnant or Parturient women d)**  
15 **Patients seeking care (non-COVID) and e) Other populations**  
16

17  
18 See PDF file attached separately  
19

20 **Supplementary figure S3 Time point of conducted sero-epidemiology studies in relation to**  
21 **country epidemic activity**  
22

23  
24 See PDF file attached separately  
25  
26  
27  
28  
29  
30  
31  
32  
33  
34  
35  
36  
37  
38  
39  
40  
41  
42  
43  
44  
45  
46  
47  
48  
49  
50  
51  
52  
53  
54  
55  
56  
57  
58  
59  
60

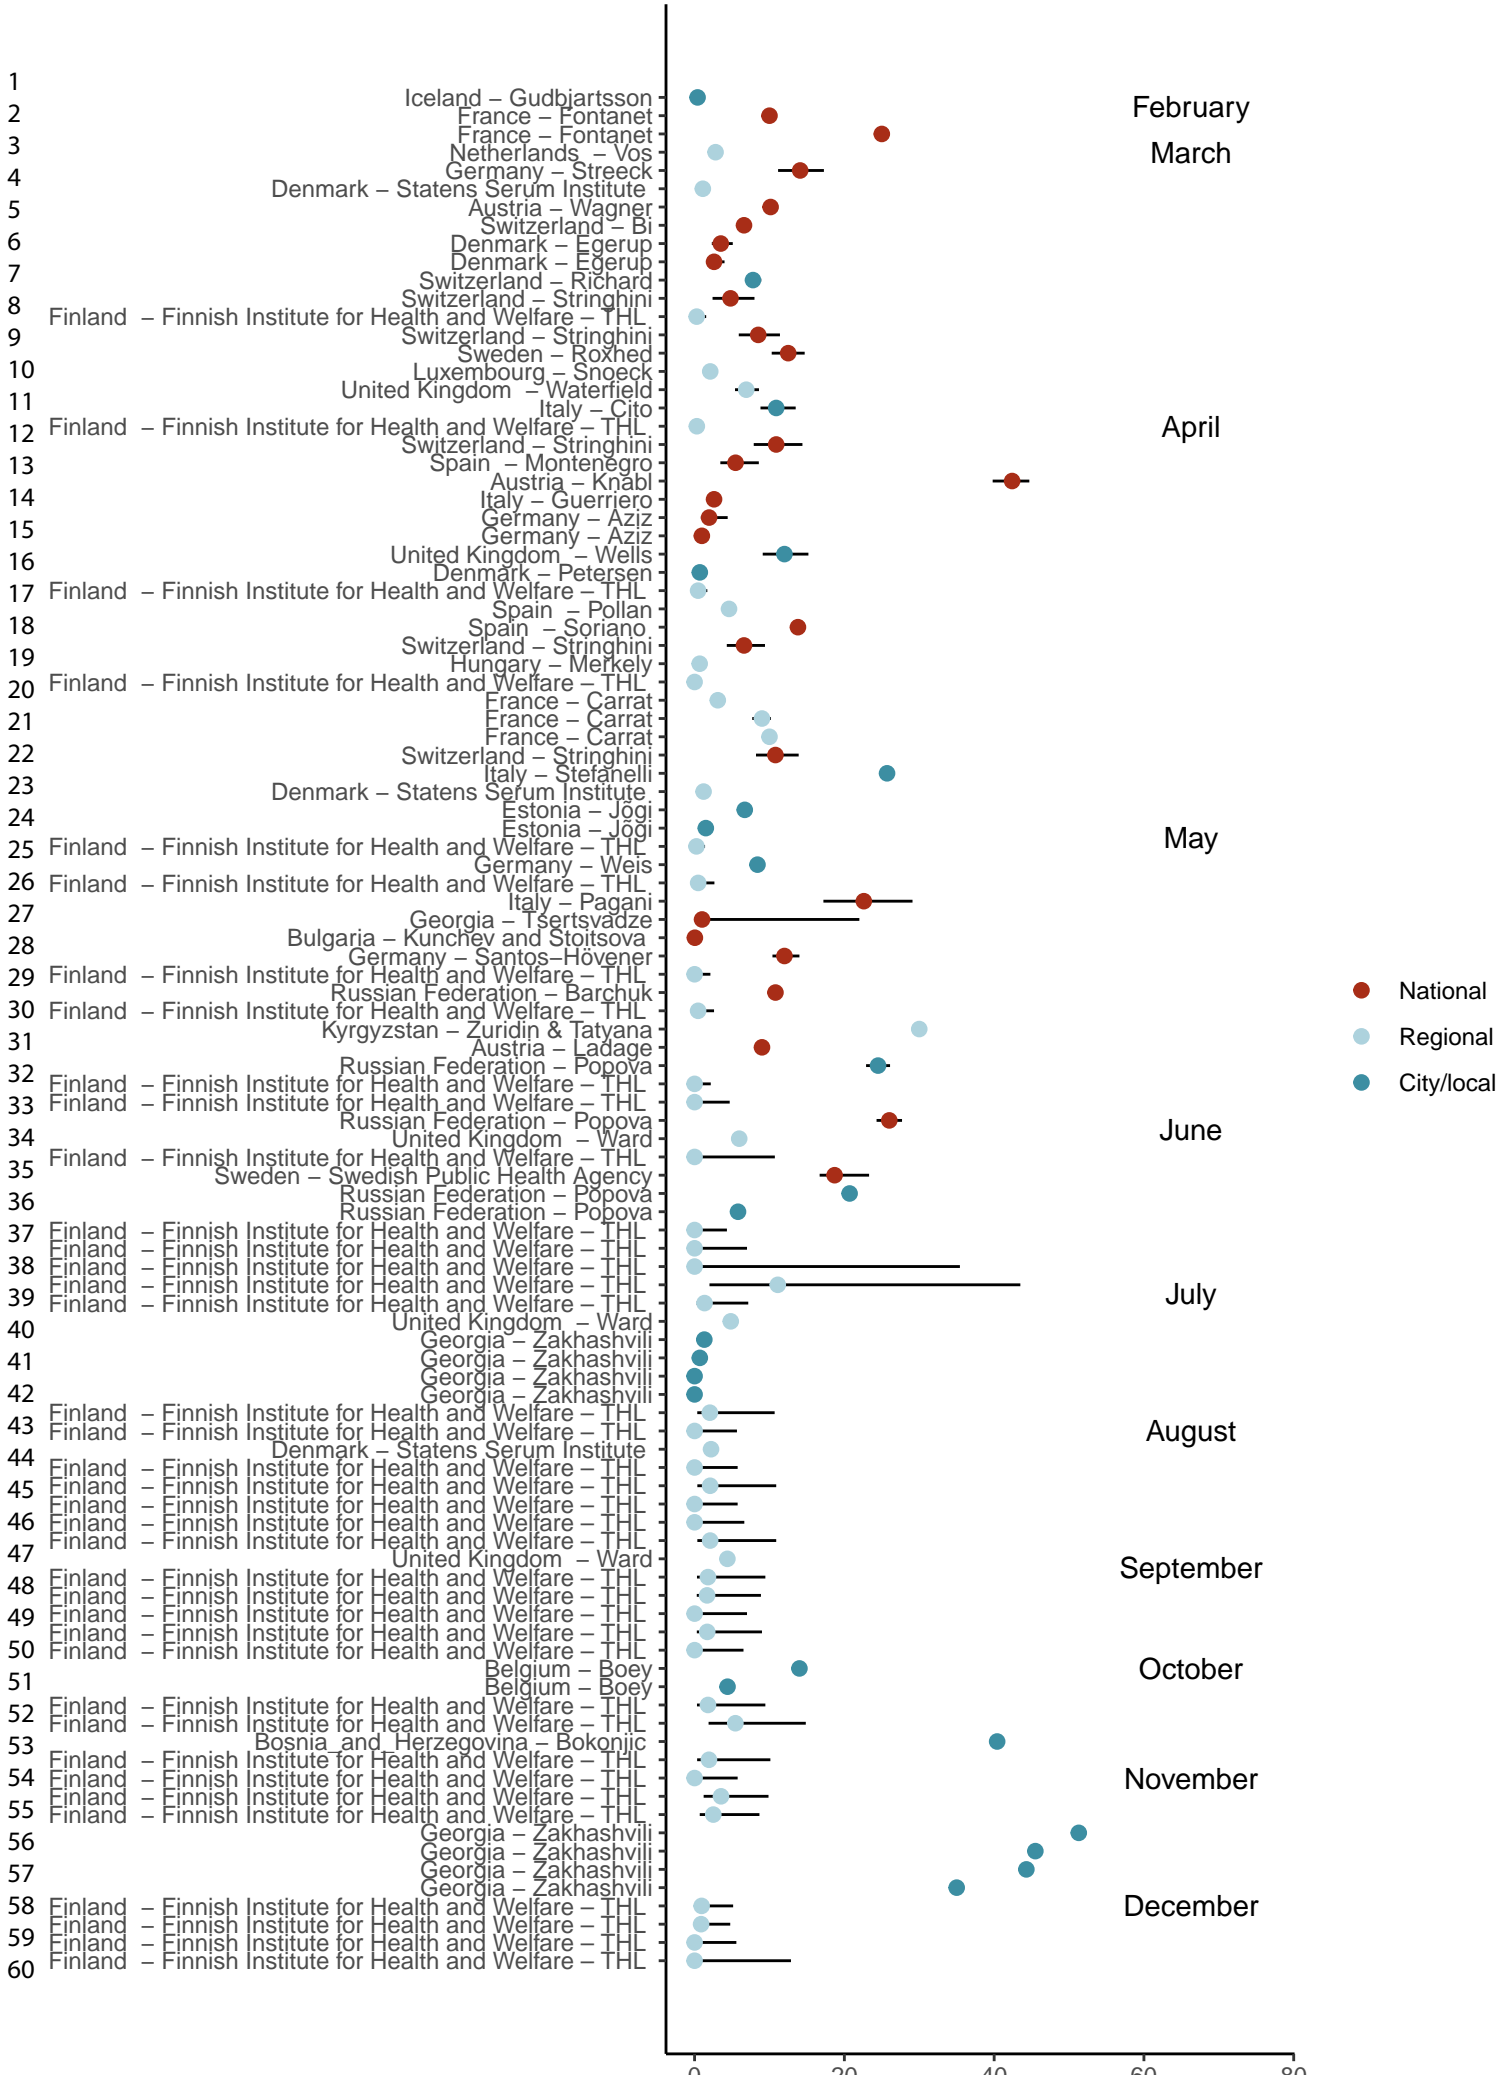

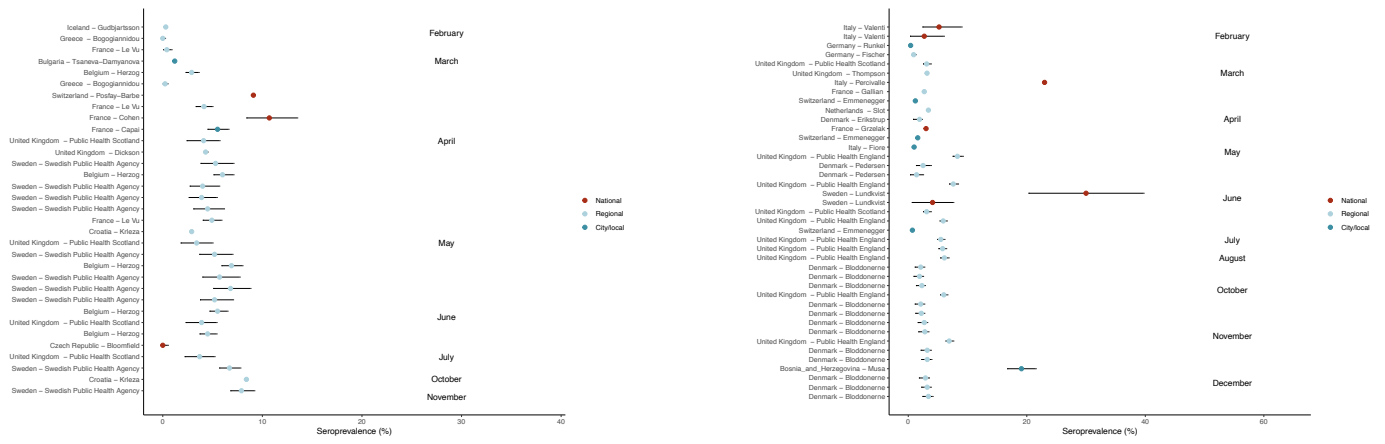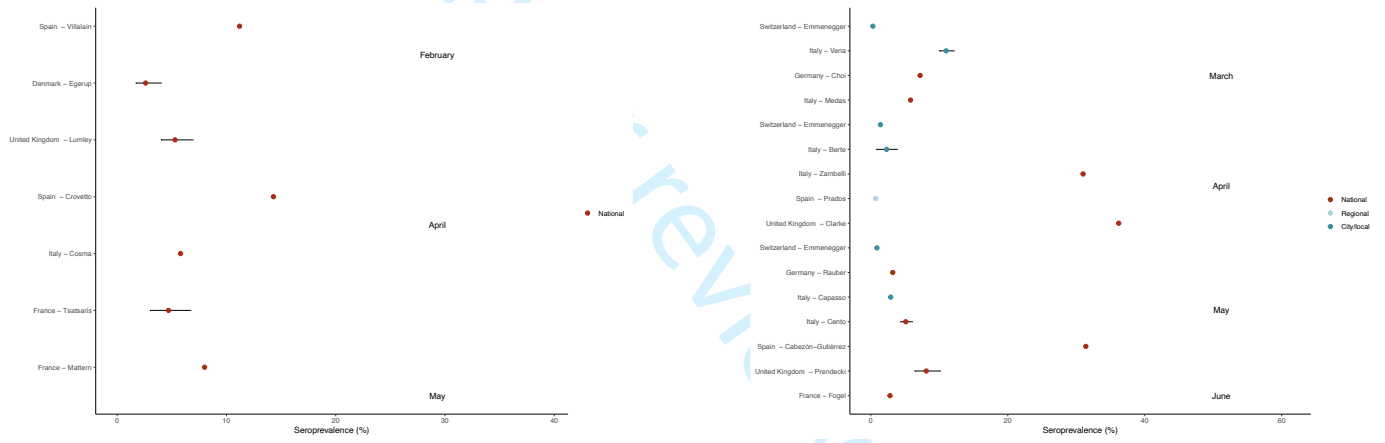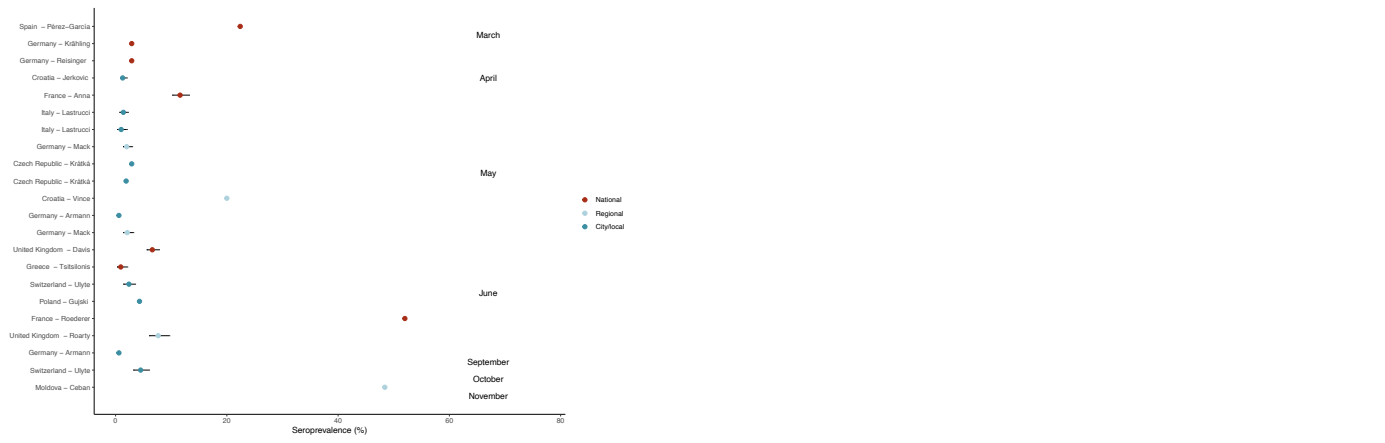

1  
2  
3  
4  
5  
6  
7  
8  
9  
10  
11  
12  
13  
14  
15  
16  
17  
18  
19  
20  
21  
22  
23  
24  
25  
26  
27  
28  
29  
30  
31  
32  
33  
34  
35  
36  
37  
38  
39  
40  
41  
42  
43  
44  
45  
46  
47  
48  
49  
50  
51  
52  
53  
54  
55  
56  
57  
58  
59  
60

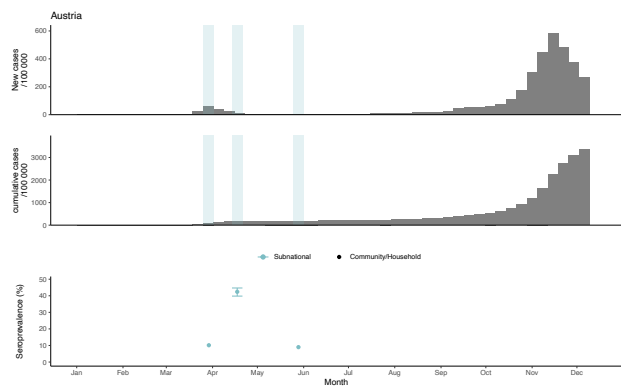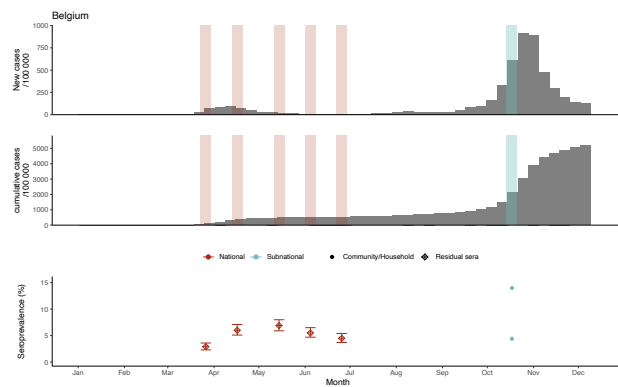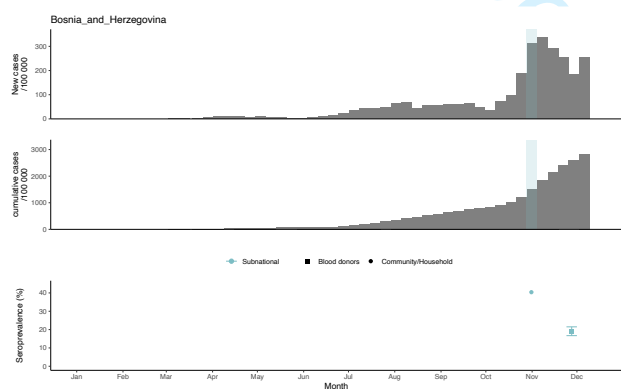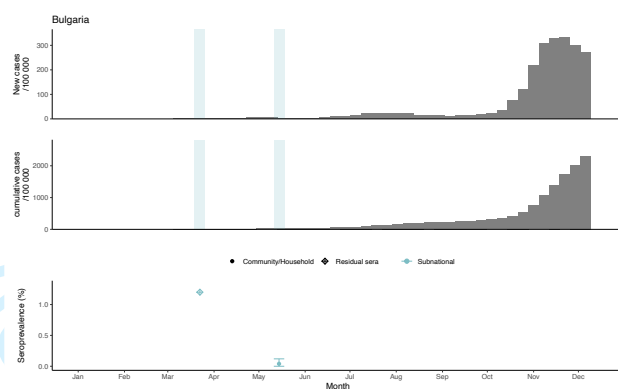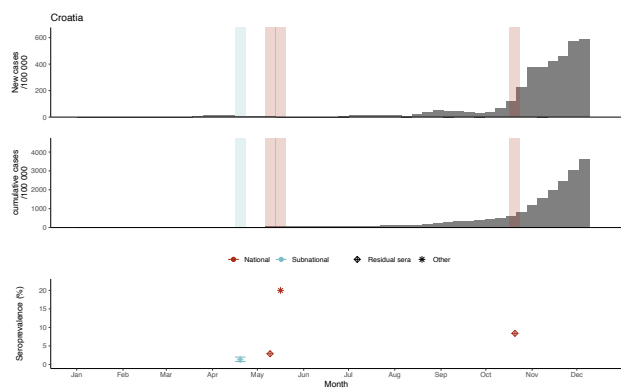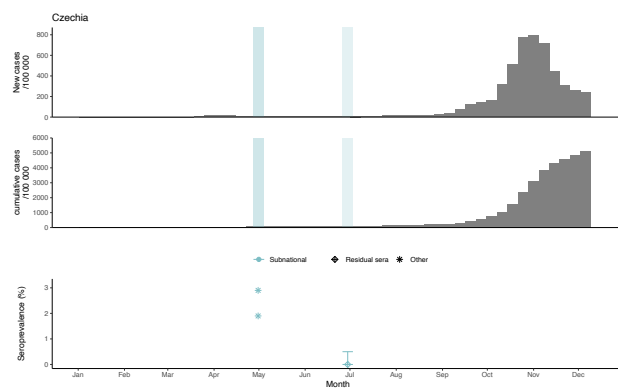

1  
2  
3  
4  
5  
6  
7  
8  
9  
10  
11  
12  
13  
14  
15  
16  
17  
18  
19  
20  
21  
22  
23  
24  
25  
26  
27  
28  
29  
30  
31  
32  
33  
34  
35  
36  
37  
38  
39  
40  
41  
42  
43  
44  
45  
46  
47  
48  
49  
50  
51  
52  
53  
54  
55  
56  
57  
58  
59  
60

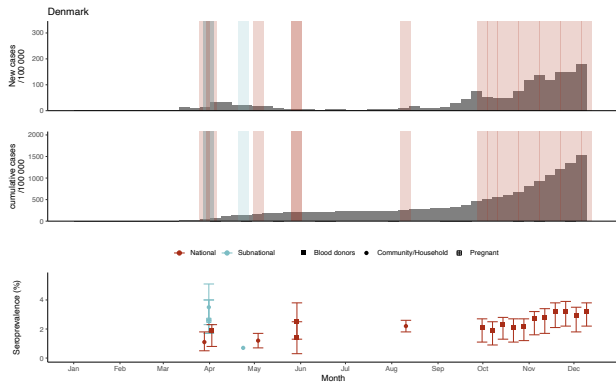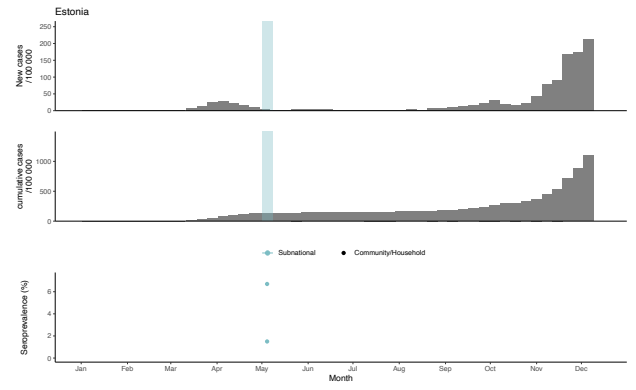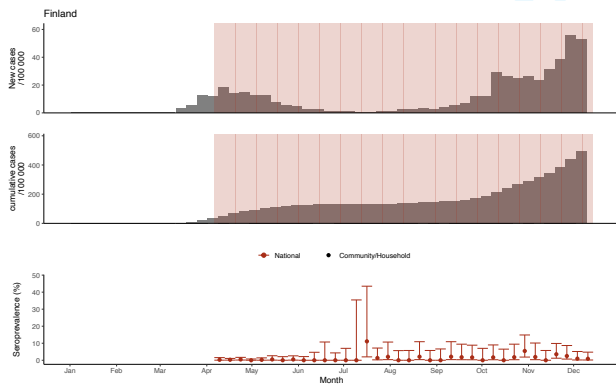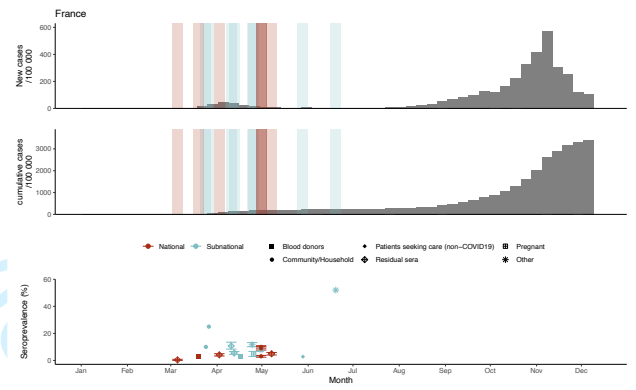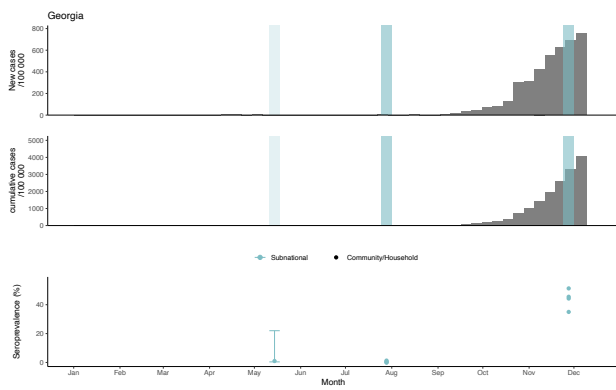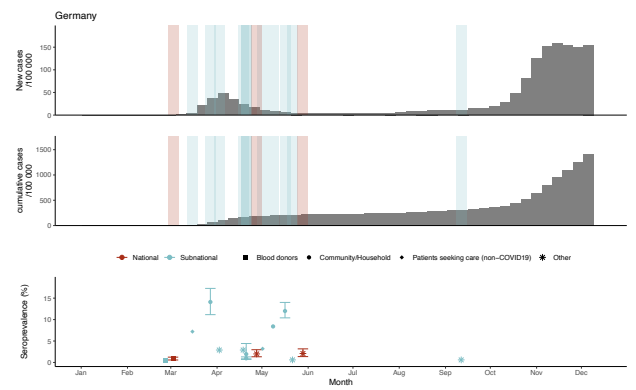

1  
2  
3  
4  
5  
6  
7  
8  
9  
10  
11  
12  
13  
14  
15  
16  
17  
18  
19  
20  
21  
22  
23  
24  
25  
26  
27  
28  
29  
30  
31  
32  
33  
34  
35  
36  
37  
38  
39  
40  
41  
42  
43  
44  
45  
46  
47  
48  
49  
50  
51  
52  
53  
54  
55  
56  
57  
58  
59  
60

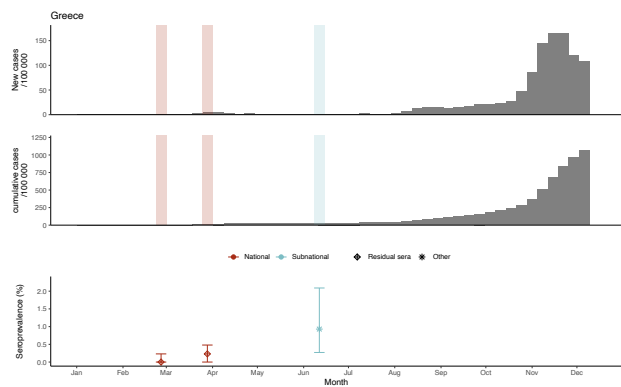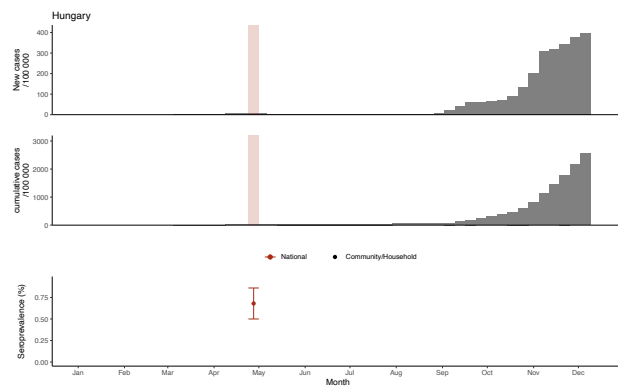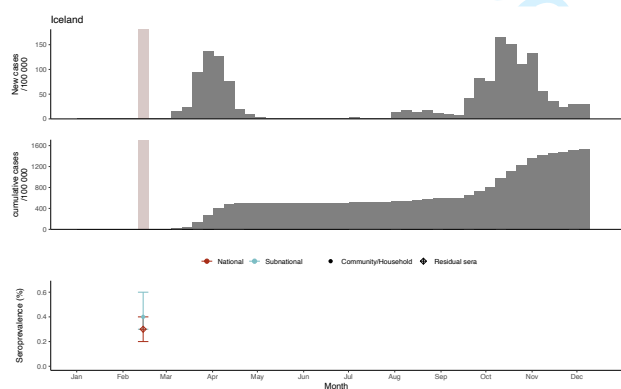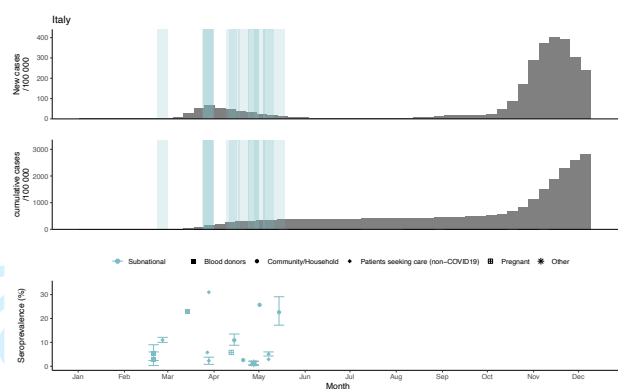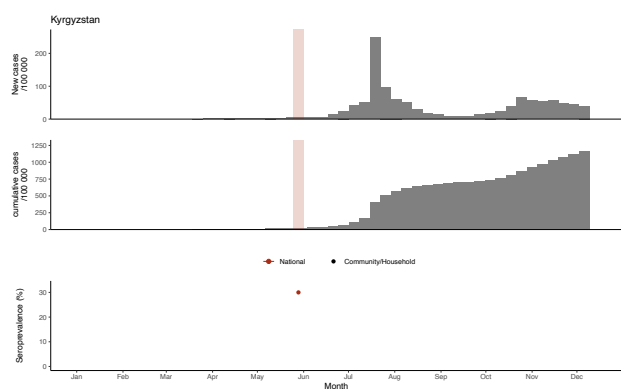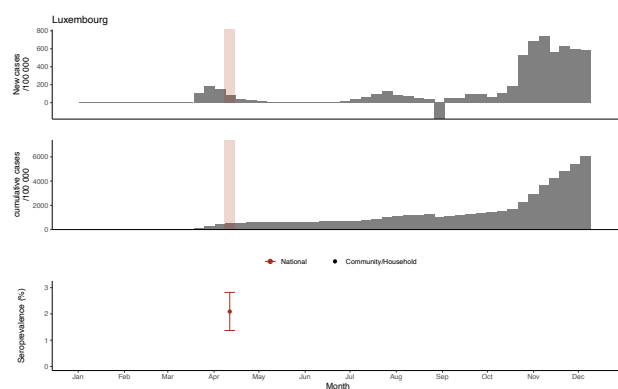



1  
2  
3  
4  
5  
6  
7  
8  
9  
10  
11  
12  
13  
14  
15  
16  
17  
18  
19  
20  
21  
22  
23  
24  
25  
26  
27  
28  
29  
30  
31  
32  
33  
34  
35  
36  
37  
38  
39  
40  
41  
42  
43  
44  
45  
46  
47  
48  
49  
50  
51  
52  
53  
54  
55  
56  
57  
58  
59  
60

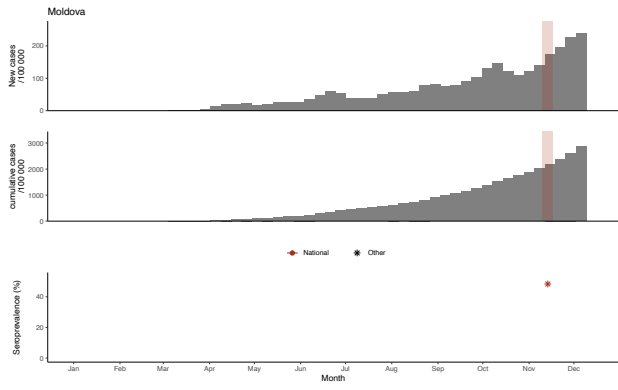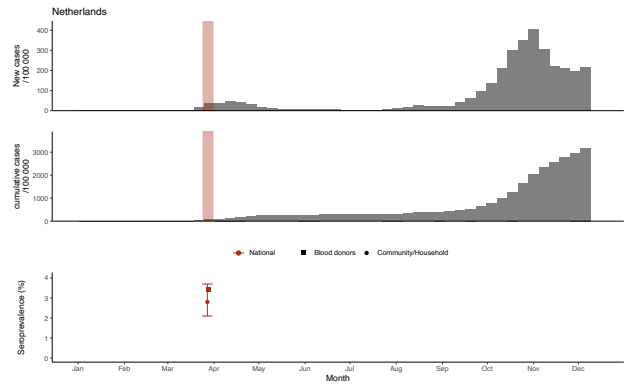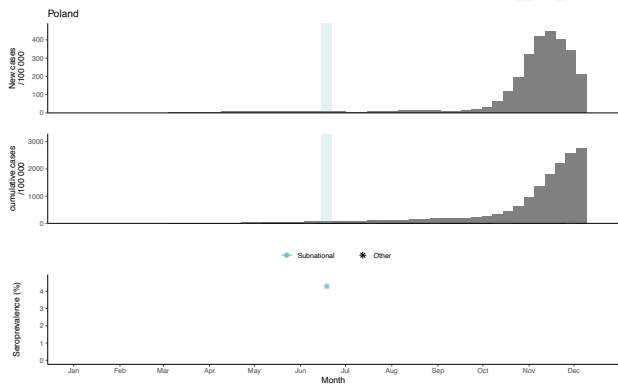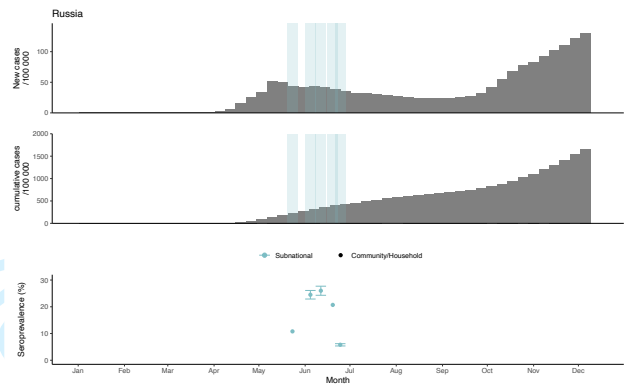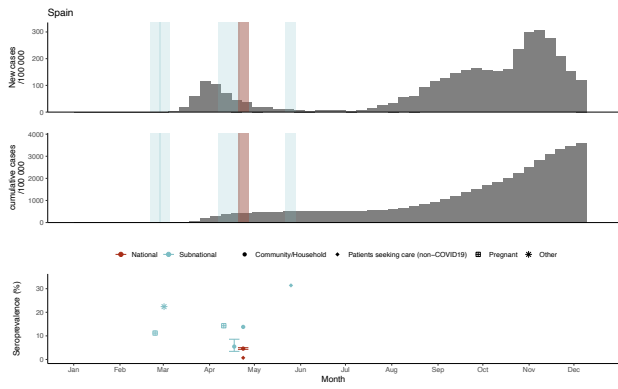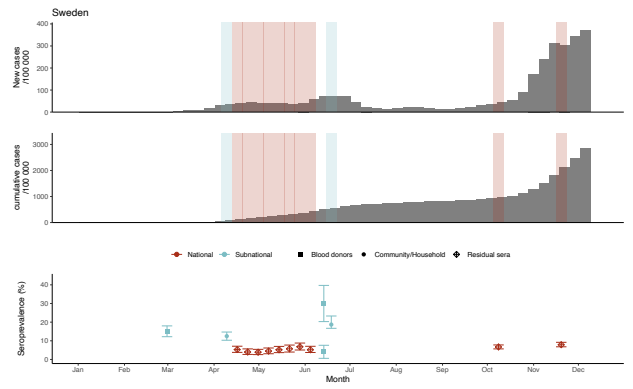

1  
2  
3  
4  
5  
6  
7  
8  
9  
10  
11  
12  
13  
14  
15  
16  
17  
18  
19  
20  
21  
22  
23  
24  
25  
26  
27  
28  
29  
30  
31  
32  
33  
34  
35  
36  
37  
38  
39  
40  
41  
42  
43  
44  
45  
46  
47  
48  
49  
50  
51  
52  
53  
54  
55  
56  
57  
58  
59  
60

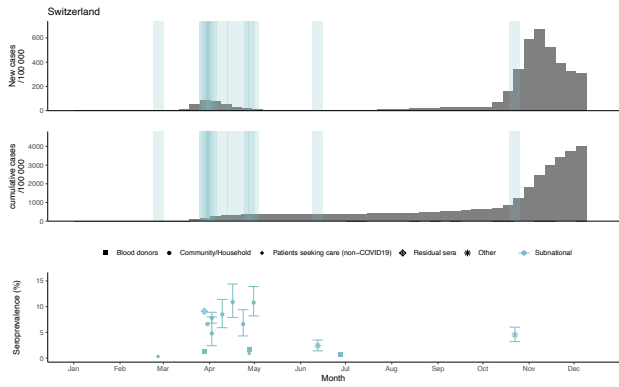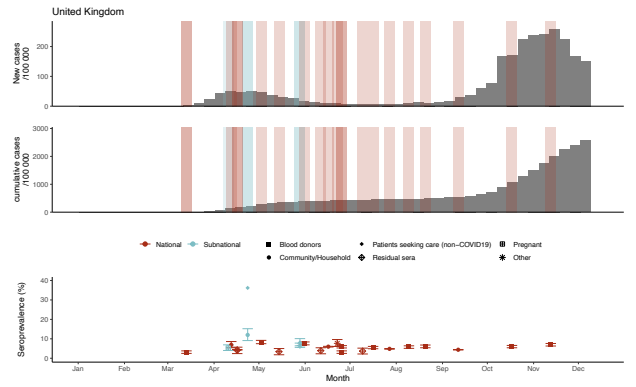

For peer review only

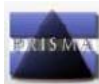

## PRISMA 2020 Checklist

| Section and Topic             | Item # | Checklist item                                                                                                                                                                                                                                                                                       | Location where item is reported     |
|-------------------------------|--------|------------------------------------------------------------------------------------------------------------------------------------------------------------------------------------------------------------------------------------------------------------------------------------------------------|-------------------------------------|
| <b>TITLE</b>                  |        |                                                                                                                                                                                                                                                                                                      |                                     |
| Title                         | 1      | Identify the report as a systematic review.                                                                                                                                                                                                                                                          | Page 1                              |
| <b>ABSTRACT</b>               |        |                                                                                                                                                                                                                                                                                                      |                                     |
| Abstract                      | 2      | See the PRISMA 2020 for Abstracts checklist.                                                                                                                                                                                                                                                         | Page 2                              |
| <b>INTRODUCTION</b>           |        |                                                                                                                                                                                                                                                                                                      |                                     |
| Rationale                     | 3      | Describe the rationale for the review in the context of existing knowledge.                                                                                                                                                                                                                          | Page 6                              |
| Objectives                    | 4      | Provide an explicit statement of the objective(s) or question(s) the review addresses.                                                                                                                                                                                                               | Page 7                              |
| <b>METHODS</b>                |        |                                                                                                                                                                                                                                                                                                      |                                     |
| Eligibility criteria          | 5      | Specify the inclusion and exclusion criteria for the review and how studies were grouped for the syntheses.                                                                                                                                                                                          | Page 7, Supplementary Material 2    |
| Information sources           | 6      | Specify all databases, registers, websites, organisations, reference lists and other sources searched or consulted to identify studies. Specify the date when each source was last searched or consulted.                                                                                            | Page 7                              |
| Search strategy               | 7      | Present the full search strategies for all databases, registers and websites, including any filters and limits used.                                                                                                                                                                                 | Page 7, Supplementary Material 1    |
| Selection process             | 8      | Specify the methods used to decide whether a study met the inclusion criteria of the review, including how many reviewers screened each record and each report retrieved, whether they worked independently, and if applicable, details of automation tools used in the process.                     | Page 8                              |
| Data collection process       | 9      | Specify the methods used to collect data from reports, including how many reviewers collected data from each report, whether they worked independently, any processes for obtaining or confirming data from study investigators, and if applicable, details of automation tools used in the process. | Page 8 and 9                        |
| Data items                    | 10a    | List and define all outcomes for which data were sought. Specify whether all results that were compatible with each outcome domain in each study were sought (e.g. for all measures, time points, analyses), and if not, the methods used to decide which results to collect.                        | Page 8 and 9                        |
|                               | 10b    | List and define all other variables for which data were sought (e.g. participant and intervention characteristics, funding sources). Describe any assumptions made about any missing or unclear information.                                                                                         | Page 8 and 9                        |
| Study risk of bias assessment | 11     | Specify the methods used to assess risk of bias in the included studies, including details of the tool(s) used, how many reviewers assessed each study and whether they worked independently, and if applicable, details of automation tools used in the process.                                    | Page 8 and 9, Supplementary Table 1 |
| Effect measures               | 12     | Specify for each outcome the effect measure(s) (e.g. risk ratio, mean difference) used in the synthesis or presentation of results.                                                                                                                                                                  | Page 8 and 9                        |
| Synthesis methods             | 13a    | Describe the processes used to decide which studies were eligible for each synthesis (e.g. tabulating the study intervention characteristics and comparing against the planned groups for each synthesis (item #5)).                                                                                 | Page 8                              |
|                               | 13b    | Describe any methods required to prepare the data for presentation or synthesis, such as handling of missing summary statistics, or data conversions.                                                                                                                                                | Page 8                              |
|                               | 13c    | Describe any methods used to tabulate or visually display results of individual studies and syntheses.                                                                                                                                                                                               | Page 8 and 9                        |
|                               | 13d    | Describe any methods used to synthesize results and provide a rationale for the choice(s). If meta-analysis was performed, describe the model(s), method(s) to identify the presence and extent of statistical heterogeneity, and software package(s) used.                                          | Page 8 and 9                        |
|                               | 13e    | Describe any methods used to explore possible causes of heterogeneity among study results (e.g. subgroup analysis, meta-regression).                                                                                                                                                                 | Page 8 and 9                        |

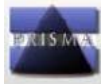

## PRISMA 2020 Checklist

| Section and Topic             | Item # | Checklist item                                                                                                                                                                                                                                                                       | Location where item is reported           |
|-------------------------------|--------|--------------------------------------------------------------------------------------------------------------------------------------------------------------------------------------------------------------------------------------------------------------------------------------|-------------------------------------------|
|                               | 13f    | Describe any sensitivity analyses conducted to assess robustness of the synthesized results.                                                                                                                                                                                         | N/A                                       |
| Reporting bias assessment     | 14     | Describe any methods used to assess risk of bias due to missing results in a synthesis (arising from reporting biases).                                                                                                                                                              | N/A                                       |
| Certainty assessment          | 15     | Describe any methods used to assess certainty (or confidence) in the body of evidence for an outcome.                                                                                                                                                                                | Page 8 and 9, Supplementary Table 1       |
| <b>RESULTS</b>                |        |                                                                                                                                                                                                                                                                                      |                                           |
| Study selection               | 16a    | Describe the results of the search and selection process, from the number of records identified in the search to the number of studies included in the review, ideally using a flow diagram.                                                                                         | Page 9, Figure 1                          |
|                               | 16b    | Cite studies that might appear to meet the inclusion criteria, but which were excluded, and explain why they were excluded.                                                                                                                                                          | Figure 9                                  |
| Study characteristics         | 17     | Cite each included study and present its characteristics.                                                                                                                                                                                                                            | Table 1, Supplementary Table 2, Figure 2  |
| Risk of bias in studies       | 18     | Present assessments of risk of bias for each included study.                                                                                                                                                                                                                         | Page 17, Supplementary Table 1            |
| Results of individual studies | 19     | For all outcomes, present, for each study: (a) summary statistics for each group (where appropriate) and (b) an effect estimate and its precision (e.g. confidence/credible interval), ideally using structured tables or plots.                                                     | Table 1, Supplementary Table 2, Figure 3. |
| Results of syntheses          | 20a    | For each synthesis, briefly summarise the characteristics and risk of bias among contributing studies.                                                                                                                                                                               | Page 17, Supplementary Table 1            |
|                               | 20b    | Present results of all statistical syntheses conducted. If meta-analysis was done, present for each the summary estimate and its precision (e.g. confidence/credible interval) and measures of statistical heterogeneity. If comparing groups, describe the direction of the effect. | Page 9-16, Figure 3                       |
|                               | 20c    | Present results of all investigations of possible causes of heterogeneity among study results.                                                                                                                                                                                       | Page 9-16, Figure 3                       |
|                               | 20d    | Present results of all sensitivity analyses conducted to assess the robustness of the synthesized results.                                                                                                                                                                           | N/A                                       |
| Reporting biases              | 21     | Present assessments of risk of bias due to missing results (arising from reporting biases) for each synthesis assessed.                                                                                                                                                              | N/A                                       |
| Certainty of evidence         | 22     | Present assessments of certainty (or confidence) in the body of evidence for each outcome assessed.                                                                                                                                                                                  | Page 9-16, Figure 3                       |
| <b>DISCUSSION</b>             |        |                                                                                                                                                                                                                                                                                      |                                           |
| Discussion                    | 23a    | Provide a general interpretation of the results in the context of other evidence.                                                                                                                                                                                                    | Page 17-20                                |
|                               | 23b    | Discuss any limitations of the evidence included in the review.                                                                                                                                                                                                                      | Page 20-21                                |
|                               | 23c    | Discuss any limitations of the review processes used.                                                                                                                                                                                                                                | Page 20-21                                |
|                               | 23d    | Discuss implications of the results for practice, policy, and future research.                                                                                                                                                                                                       | Page 21                                   |
| <b>OTHER INFORMATION</b>      |        |                                                                                                                                                                                                                                                                                      |                                           |

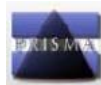

## PRISMA 2020 Checklist

| Section and Topic                              | Item # | Checklist item                                                                                                                                                                                                                             | Location where item is reported |
|------------------------------------------------|--------|--------------------------------------------------------------------------------------------------------------------------------------------------------------------------------------------------------------------------------------------|---------------------------------|
| Registration and protocol                      | 24a    | Provide registration information for the review, including register name and registration number, or state that the review was not registered.                                                                                             | Page 7                          |
|                                                | 24b    | Indicate where the review protocol can be accessed, or state that a protocol was not prepared.                                                                                                                                             | Page 7                          |
|                                                | 24c    | Describe and explain any amendments to information provided at registration or in the protocol.                                                                                                                                            | Page 7                          |
| Support                                        | 25     | Describe sources of financial or non-financial support for the review, and the role of the funders or sponsors in the review.                                                                                                              | Page 23                         |
| Competing interests                            | 26     | Declare any competing interests of review authors.                                                                                                                                                                                         | Page 23                         |
| Availability of data, code and other materials | 27     | Report which of the following are publicly available and where they can be found: template data collection forms; data extracted from included studies; data used for all analyses; analytic code; any other materials used in the review. | Supplementary Table 2           |

From: Page MJ, McKenzie JE, Bossuyt PM, Boutron I, Hoffmann TC, Mulrow CD, et al. The PRISMA 2020 statement: an updated guideline for reporting systematic reviews. *BMJ* 2021;372:n71. doi: 10.1136/bmj.n71

For more information, visit: <http://www.prisma-statement.org/>

# BMJ Open

## A systematic review of seroprevalence of SARS-CoV-2 antibodies and appraisal of evidence, prior to the widespread introduction of vaccine programmes in the WHO European Region, January - December 2020

|                                 |                                                                                                                                                                                                                                                                                                                                                                                                                                                                                                                                                                                                                                                                                                                                                            |
|---------------------------------|------------------------------------------------------------------------------------------------------------------------------------------------------------------------------------------------------------------------------------------------------------------------------------------------------------------------------------------------------------------------------------------------------------------------------------------------------------------------------------------------------------------------------------------------------------------------------------------------------------------------------------------------------------------------------------------------------------------------------------------------------------|
| Journal:                        | <i>BMJ Open</i>                                                                                                                                                                                                                                                                                                                                                                                                                                                                                                                                                                                                                                                                                                                                            |
| Manuscript ID                   | bmjopen-2022-064240.R1                                                                                                                                                                                                                                                                                                                                                                                                                                                                                                                                                                                                                                                                                                                                     |
| Article Type:                   | Original research                                                                                                                                                                                                                                                                                                                                                                                                                                                                                                                                                                                                                                                                                                                                          |
| Date Submitted by the Author:   | 30-Jul-2023                                                                                                                                                                                                                                                                                                                                                                                                                                                                                                                                                                                                                                                                                                                                                |
| Complete List of Authors:       | Vaughan, Aisling; World Health Organization Regional Office for Europe<br>Duffell, Erika; European Centre for Disease Prevention and Control<br>Freidl, Gudrun; World Health Organization Regional Office for Europe<br>Lemos, Diogo; World Health Organization Regional Office for Europe<br>Nardone, Anthony; Epiconcept SAS<br>Valenciano, M; Epiconcept SAS<br>Subissi, Lorenzo; World Health Organization<br>Bergeri, Isabel; World Health Organization<br>Broberg, Eeva ; European Centre for Disease Prevention and Control<br>Penttinen, Pasi; European Centre for Disease Prevention and Control<br>Pebody, Richard; World Health Organization Regional Office for Europe<br>Keramarou, Maria; European Centre for Disease Prevention and Control |
| <b>Primary Subject Heading</b>: | Public health                                                                                                                                                                                                                                                                                                                                                                                                                                                                                                                                                                                                                                                                                                                                              |
| Secondary Subject Heading:      | Epidemiology                                                                                                                                                                                                                                                                                                                                                                                                                                                                                                                                                                                                                                                                                                                                               |
| Keywords:                       | Epidemiology < INFECTIOUS DISEASES, Public health < INFECTIOUS DISEASES, INFECTIOUS DISEASES, COVID-19, Systematic Review                                                                                                                                                                                                                                                                                                                                                                                                                                                                                                                                                                                                                                  |
|                                 |                                                                                                                                                                                                                                                                                                                                                                                                                                                                                                                                                                                                                                                                                                                                                            |

SCHOLARONE™  
Manuscripts



I, the Submitting Author has the right to grant and does grant on behalf of all authors of the Work (as defined in the below author licence), an exclusive licence and/or a non-exclusive licence for contributions from authors who are: i) UK Crown employees; ii) where BMJ has agreed a CC-BY licence shall apply, and/or iii) in accordance with the terms applicable for US Federal Government officers or employees acting as part of their official duties; on a worldwide, perpetual, irrevocable, royalty-free basis to BMJ Publishing Group Ltd ("BMJ") its licensees and where the relevant Journal is co-owned by BMJ to the co-owners of the Journal, to publish the Work in this journal and any other BMJ products and to exploit all rights, as set out in our [licence](#).

The Submitting Author accepts and understands that any supply made under these terms is made by BMJ to the Submitting Author unless you are acting as an employee on behalf of your employer or a postgraduate student of an affiliated institution which is paying any applicable article publishing charge ("APC") for Open Access articles. Where the Submitting Author wishes to make the Work available on an Open Access basis (and intends to pay the relevant APC), the terms of reuse of such Open Access shall be governed by a Creative Commons licence – details of these licences and which [Creative Commons](#) licence will apply to this Work are set out in our licence referred to above.

Other than as permitted in any relevant BMJ Author's Self Archiving Policies, I confirm this Work has not been accepted for publication elsewhere, is not being considered for publication elsewhere and does not duplicate material already published. I confirm all authors consent to publication of this Work and authorise the granting of this licence.

1  
2  
3 **A systematic review of seroprevalence of SARS-CoV-2 antibodies and appraisal of evidence,**  
4 **prior to the widespread introduction of vaccine programmes in the WHO European Region,**  
5 **January - December 2020**  
6  
7

8  
9 Vaughan A <sup>1</sup>, Duffell EF <sup>2</sup>, Freidl GS <sup>1</sup>, Lemos DS <sup>1</sup>, Nardone A <sup>3</sup>, Valenciano M <sup>3</sup>, Subissi L<sup>4</sup>, Bergeri I <sup>4</sup>,  
10 Broberg E <sup>2</sup>, Penttinen P <sup>2</sup>, Pebody R <sup>1</sup>, and Keramarou M <sup>2</sup>  
11

12 1. World Health Organization Regional Office for Europe, Copenhagen, Denmark; 2. European Centre for  
13 Disease Prevention and Control, Stockholm, Sweden; 3. Epiconcept, Paris, France; 4. World Health  
14 Organization, Geneva, Switzerland  
15

16  
17 Corresponding author: Dr. Aisling Vaughan, World Health Organization Regional Office for Europe,  
18 Copenhagen, Denmark; vaughana@who.int  
19

20  
21 **ABSTRACT**  
22

23 **Objectives**  
24

25 Systematic review of SARS-CoV-2 seroprevalence studies undertaken in the WHO European Region to  
26 measure pre-existing and cumulative seropositivity prior to the roll out of vaccination programmes.  
27  
28

29 **Design**  
30

31 A systematic review of the literature  
32

33 **Data sources**  
34

35 We searched MEDLINE, EMBASE and the pre-print servers medRxiv and bioRxiv within the “COVID-  
36 19 Global literature on coronavirus disease” database using a predefined search strategy. Articles were  
37 supplemented with unpublished WHO-supported Unity-aligned seroprevalence studies and other studies  
38 reported directly to WHO Regional Office for Europe and ECDC.  
39  
40  
41  
42  
43

44 **Eligibility criteria**  
45

46 Studies published before the widespread implementation of COVID-19 vaccination programmes in January  
47 2021 among the general population and blood donors, at national and regional levels.  
48  
49

50 **Data extraction and synthesis**  
51  
52  
53  
54  
55  
56  
57  
58  
59  
60



1  
2  
3 At least two independent researchers extracted the eligible studies; a third researcher resolved any  
4 disagreements. Study risk of bias was assessed using a quality scoring system based on sample size,  
5  
6  
7 sampling and testing methodologies.  
8

## 9 **Results**

10  
11 In total, 111 studies from 26 countries published or conducted between 01/01/2020 and 31/12/2020 across  
12  
13 the WHO European Region were included. A significant heterogeneity in implementation was noted across  
14  
15 the studies, with a paucity of studies from the east of the Region. Sixty-four (58%) studies were assessed  
16  
17 to be of medium to high risk of bias. Overall, SARS-CoV-2 seropositivity prior to widespread community  
18  
19 circulation was very low. National seroprevalence estimates after circulation started ranged from 0% to  
20  
21 51.3% (median 2.2% (IQR 0.7-5.2%); n=124), while sub-national estimates ranged from 0% to 52%  
22  
23 (median 5.8% (IQR 2.3-12%); n=101), with the highest estimates in areas following widespread local  
24  
25 transmission.  
26  
27

## 28 **Conclusions**

29  
30 The low levels of SARS-CoV-2 antibody in most populations prior to the start of vaccine programmes  
31  
32 underlines the critical importance of targeted vaccination of priority groups at risk of severe disease, while  
33  
34 maintaining reduced levels of transmission to minimize population morbidity and mortality.  
35  
36  
37  
38

## 39 **STRENGTHS AND LIMITATIONS OF THIS STUDY**

- 40
- 41 • This study provides a comprehensive systematic review of SARS-CoV-2 seroprevalence literature
  - 42 of all languages, and unpublished data.
  - 43 • Thorough literature search of major electronic databases and reporting as per Preferred
  - 44 Reporting Items for Systematic Reviews and Meta-Analyses guidelines.
  - 45 • Due to heterogeneity between studies including sampling frame, population and stage of
  - 46 epidemic at time of serosurvey results are described narratively.
  - 47 • Seroprevalence may be underestimated as antibody waning was not taken into account.
  - 48
  - 49
  - 50
  - 51
  - 52
  - 53
  - 54
  - 55
  - 56
  - 57
  - 58
  - 59
  - 60

## INTRODUCTION

The novel virus, Severe Acute Respiratory Syndrome–Coronavirus–2 (SARS-CoV-2) was first identified in Wuhan, China in December 2019 and spread rapidly around the world. At that time, the transmissibility, population susceptibility, clinical spectrum and infection-severity of this novel virus were all unknown. By 1 January 2021, approximately 83 million confirmed cases were reported globally, while in the WHO European Region, there were 4.9 million cases (1). However, notified cases and deaths are an underestimate of the true number of infections for reasons including clinical presentation with a large proportion of asymptomatic or mildly symptomatic cases, testing and reporting strategies and health care seeking behaviour (2). Asymptomatic infection has been reported in many studies with the proportion ranging from 6 to 41% (3-5) so a significant proportion of SARS-CoV-2 infections will be missed through case-based surveillance systems. (6).

Seroprevalence studies, which measure SARS-CoV-2 antibodies, can provide an important complement to routine surveillance, particularly as part of the assessment of novel emerging respiratory pathogens. Seroprevalence surveys are essential to assess the true-extent of prevalence of pre-existing cross-reactive antibodies in the population; to measure population age-specific and geographic cumulative seroincidence as the novel virus spreads and to contribute to estimating infection-severity. As the majority of SARS-CoV-2 infected individuals have a detectable humoral immune response on average 10-14 days after symptom onset and most individuals seroconvert within 3-4 weeks of infection (7), and anti-SARS-CoV-2 antibodies are predictive of immune protection (8, 9), seroprevalence studies can provide an indication of population levels of humoral immunity and inform public health policies.

Since the start of the COVID-19 pandemic, there has been a rapid accumulation of seroepidemiological studies describing the seroprevalence of SARS-CoV-2. This review aims to provide a comprehensive review of studies conducted in the WHO European Region between 1 January and 31 December 2020 in the general population, with the aim to synthesize evidence on the extent of transmission across the region

1  
2  
3 and population immunity to this newly emerging infection before the start of the COVID-19 vaccination  
4 programmes. As SARS-CoV-2 continues to circulate, understanding the age-specific population  
5 seropositivity remains critical for policymakers and public health officials to make informed decisions on  
6 optimal public health interventions (10).  
7  
8  
9  
10

## 11 **METHODS**

### 12 **Search strategy**

13  
14 We searched MEDLINE, WHO COVID, EMBASE and the pre-print servers medRxiv and bioRxiv within  
15 the WHO “COVID-19 Global literature on coronavirus disease” database on 21 October 2020 and 12  
16 January 2021. The searches spanned the period 1 January - 31 December 2020 and was not restricted by  
17 language. We supplemented these articles with WHO-supported Unity seroprevalence studies and  
18 unpublished studies reported to WHO Regional Office for Europe and ECDC. The selection process  
19 followed the Preferred Reporting Items for Systematic Reviews and Meta-analyses (PRISMA) guidelines  
20 (11). The full search strategy, search terms as well as inclusion and exclusion criteria are described in  
21 Supplementary Material S1.  
22  
23  
24  
25  
26  
27  
28  
29  
30  
31

### 32 **Data extraction**

33  
34 We combined the references from all databases, removed duplicates and imported the remaining articles  
35 into Rayyan software (12) for screening of titles and abstracts according to the inclusion and exclusion  
36 criteria (Supplementary Table S1). After the initial screening of title and abstracts, two independent  
37 researchers assessed full-text publications for eligibility. Data from pre-print articles were extracted and  
38 later replaced with data from published articles, where necessary. At least two independent researchers  
39 extracted the eligible studies; a third researcher resolved any disagreements on assessment of eligibility or  
40 extraction. We extracted the following data: first author, publication date, country, region, period of study,  
41 population type, population age, sampling method, sample size, laboratory methods used, confirmatory  
42 testing, test performance, crude and adjusted point seroprevalence estimates, antibody type and analysis  
43 methodology (16-131). Comparison was made with weekly laboratory confirmed case and death reports.  
44  
45  
46  
47  
48  
49  
50  
51  
52  
53  
54  
55  
56  
57  
58  
59  
60

### Study quality assessment

We used a modified Joana Briggs quality assessment scoring system to assess the overall risk of bias of each study (13). The criteria included: a) the sampling frame (to assess representativeness of the general population); b) stratification (age, sex or population); c) recruitment method (random, convenience), d): adequacy of sample size, e): serological methods and validation; f) and statistical analyses (adjustment of results to account for the sensitivity and specificity of the test). A cumulative quality score classified the overall risk of bias of each study into high risk of bias (1-3), medium risk of bias (4-6) or low risk of bias (>6). Two independent researchers conducted the quality assessment; a third researcher resolved any disagreements. See Supplementary Table S2 for more details on the quality criteria. For the purposes of quality assessment, the threshold for acceptable test performance was  $\geq 95\%$  sensitivity and  $>97\%$  specificity for laboratory assays and  $\geq 90\%$  sensitivity and  $>97\%$  specificity for point-of-care tests (14).

### Data analysis

We used descriptive statistics to summarize estimates by subgroup (median and inter-quartile range (IQR). We generated forest plots to display the data and explore variations according to specific characteristics, including time, geographic location and population group. Correlation between cumulative incidence and cumulative deaths and seroprevalence estimates from studies of the general population was explored using Spearman's rank correlation. We compared seroprevalence estimates from studies of the general population and the cumulative incidence and deaths at the start of each study. Analyses were performed in Microsoft Excel (version 2016) and R version 4.0.4.

### Patient and public involvement

No patient involved

## RESULTS

### Literature search

The literature search resulted in 4,063 studies. After deduplication, application of inclusion and exclusion criteria and supplementation with articles from other sources, a total of 111 studies were included in this review. Of these, 77 were published articles, 19 were preprints, nine were institutional reports, and six were studies were identified through reporting of unpublished results to WHO or ECDC. See Figure 1 PRISMA flow diagram study selection.

### Study characteristics

The 111 studies included 224 seroprevalence estimates from 26 of the 53 countries in the WHO European Region (Figure 2). The majority of studies (n=82; 74%) were conducted in 19 EU/EEA countries, while 29 studies (26%) conducted in seven non-EU/EEA countries (Bosnia and Herzegovina, Georgia, Kyrgyzstan, Republic of Moldova, Russian Federation, Switzerland and the United Kingdom) (Figure 2; Table 1). Fifty-six (50%) studies were aligned with the World Health Organization Unity population-based sero-epidemiological investigation criteria related to study design, data collection and analysis (15). The majority of studies (n=69, 62%) used non-random or convenience sampling of the population. Forty-one (37%) studies used random sampling, while one study did not report sampling methodology. Characteristics and details of included studies are shown in Table 1 and Table S1, respectively.

**Table 1: Study characteristics**

| Characteristics                         | Number of studies | %   |
|-----------------------------------------|-------------------|-----|
| <b>Total</b>                            | 111               | 100 |
| <b>Study characteristics</b>            |                   |     |
| <b>Country</b>                          |                   |     |
| WHO European Region (EU/EEA)            | 82                | 74  |
| WHO European Region (outside of EU/EEA) | 29                | 26  |
| <b>WHO UNITY alignment</b>              |                   |     |
| Unity-aligned                           | 56                | 50  |
| Not Unity-aligned                       | 55                | 50  |
| <b>Publication type</b>                 |                   |     |
| Peer-reviewed article                   | 77                | 69  |
| Pre-print                               | 19                | 17  |
| Institutional report                    | 9                 | 8   |
| Not yet published                       | 6                 | 5   |
| <b>Geographical level</b>               |                   |     |
| National                                | 33                | 30  |
| Regional                                | 27                | 24  |
| City/Local                              | 50                | 44  |
| Multiple                                | 1                 | 1   |
| <b>Sampling strategy</b>                |                   |     |

|    |                                            |    |    |
|----|--------------------------------------------|----|----|
| 1  |                                            |    |    |
| 2  |                                            |    |    |
| 3  | Convenience                                | 69 | 62 |
| 4  | Random                                     | 41 | 37 |
| 5  | Not reported                               | 1  | 1  |
| 6  | <b>Population type</b>                     |    |    |
| 7  | Household/Community                        | 45 | 41 |
| 8  | Residual sera                              | 13 | 12 |
| 9  | Blood donors                               | 16 | 14 |
| 10 | Patients seeking healthcare (non COVID-19) | 13 | 12 |
| 11 | Pregnant or parturient women               | 7  | 6  |
| 12 | Other/multiple                             | 23 | 21 |
| 13 | <b>Quality assessment</b>                  |    |    |
| 14 | Low risk of bias                           | 41 | 37 |
| 15 | Medium risk of bias                        | 40 | 36 |
| 16 | High risk of bias                          | 24 | 22 |
| 17 | N/A                                        | 6  | 5  |
| 18 | <b>Sample size</b>                         |    |    |
| 19 | <1000                                      | 45 | 41 |
| 20 | >=1000                                     | 66 | 59 |
| 21 | <b>Laboratory characteristics</b>          |    |    |
| 22 | <b>Serological method</b>                  |    |    |
| 23 | ELISA                                      | 55 | 50 |
| 24 | CMIA/CLIA                                  | 42 | 38 |
| 25 | LFA                                        | 25 | 23 |
| 26 | MN                                         | 10 | 9  |
| 27 | Other                                      | 8  | 7  |
| 28 | Not reported                               | 2  | 1  |
| 29 | <b>Type of assay</b>                       |    |    |
| 30 | Commercial                                 | 90 | 81 |
| 31 | In-house                                   | 26 | 23 |
| 32 | Not reported                               | 2  | 1  |

\*ELISA – Enzyme linked immunoassay; CMIA/CLIA - Chemiluminescence Microparticle Immunoassay/ Chemiluminescence Microparticle Immunoassay; LFA – Lateral flow immunoassay; MN – Microneutralization assay

1  
2  
3  
4  
5  
6  
7  
8  
9  
10  
11  
12  
13  
14  
15  
16  
17  
18  
19  
20  
21  
22  
23  
24  
25  
26  
27  
28  
29  
30  
31  
32  
33  
34  
35  
36  
37  
38  
39  
40  
41  
42  
43  
44  
45  
46  
47

For peer review only

1  
2  
3 In total, 72 (65%) of the studies provided representative estimates from the general population, of which  
4 sample frames included 45 (41%) studies of household or community samples, 13 (12%) residual sera, 13  
5 (12%) patients seeking healthcare for non-COVID-19 related issues, seven (6%) pregnant or parturient  
6 women. Sixteen (14%) studies sampled blood donors as a proxy for the general population while 23 (21%)  
7 sampled other or multiple populations. Studies were conducted at differing geographical levels within a  
8 country, including at the national level (n=33; 30%), regional level (n=27; 24%) and city or local level  
9 (n=50; 44%). One study reported both national and regional estimates  
10  
11  
12  
13  
14  
15  
16  
17  
18  
19

20 Over half of the studies used one serological assay (74; 67%) while 34 (31%) used at least two different  
21 assays. In 82 studies (74%), commercial assays from various sources were used, 20 (18%) studies used an  
22 in-house assay only and six studies (5%) used both a commercial and in-house developed assay. The test  
23 method was not reported in two studies. An Enzyme-linked Immunosorbent assay (ELISA) was the method  
24 most commonly employed (n=55, 50%), followed by Chemiluminescent immunoassay (CLIA) or  
25 Chemiluminescence Microparticle Immunoassay (CMIA) (n=42, 38%) and lateral flow immunoassays  
26 (LFAs) (n=25, 23%). Seventeen studies (15%) used LFAs exclusively. Ten studies (9%) employed in-  
27 house microneutralization assays to assess the neutralizing ability of SARS-CoV-2 antibodies.  
28  
29  
30  
31  
32  
33  
34  
35  
36  
37  
38

39 Of 90 studies that used a commercial assay, 33 studies (37%) reported the use of tests with acceptable  
40 sensitivity and specificity. Of those that independently validated assay performance (n=41, 46%), 14 (34%)  
41 reported acceptable sensitivity and specificity, while 27 (66%) did not meet these thresholds. Of the 20  
42 studies that used an in-house assay, nine (45%) reported an acceptable test performance, four (20%)  
43 performed below these thresholds and seven (35%) did not report on test performance. The majority of  
44 studies (n=83, 75%) did not report adjustment for test sensitivity or specificity in their analysis.  
45  
46  
47  
48  
49  
50  
51  
52  
53  
54  
55  
56  
57  
58  
59  
60



1  
2  
3  
4  
5 Based on our quality scoring system (Supplementary Table S2), 81 studies (73%) were of high or medium  
6 quality reflecting a low or medium risk of bias, respectively (medium quality: n=40, 36%; high quality  
7 n=41, 37%) (Supplementary Table S3). A total of 24 studies (22%) were determined to be at high risk of  
8 bias, largely due to non-random sampling frame, weak representativeness of the general population or lack  
9 of adjustment for sampling bias or test performance.  
10  
11  
12  
13  
14

### 15 16 17 18 **Seroprevalence estimates**

19  
20 Seroprevalence estimates (n=88) from national studies ranged from 0% (CI: 0.0-0.7) in Finland in May (26)  
21 to 51.3% in Georgia in December (28) (median 2.2% (IQR 0.7 – 5.2%); n=124) (Figure 3a), while  
22 seroprevalence estimates from studies spanning regions, cities or towns (n=101) ranged from 0% (CI 0.0-  
23 0.5%) in Czech Republic in August 2020 (28) to 52% in a Médecins Sans Frontières centre in Paris, France  
24 during an outbreak with widespread community transmission in June 2020 (114) (median 5.8% (IQR 2.3-  
25 12%); n=101) (Figure 3b).  
26  
27  
28  
29  
30  
31  
32  
33  
34

35 A total of 45 studies provided seroprevalence estimates (n=105) from community or household samples  
36 and 39 studies (87%) were found to be of high or medium quality. Seroprevalence estimates ranged from  
37 0% (CI: 0-0.7%) in Finland in May and to 51.3% in December 2020 in Georgia (28) (median 2.6% (IQR  
38 0.5-10%) n=105) (Supplementary Figure S1).  
39  
40  
41  
42  
43  
44

45 Thirteen studies screened residual clinical samples (29-42) between February and November 2020, of  
46 which nine (70%) were of high or medium quality. Seroprevalence estimates (n=34) in this population  
47 varied across countries ranging from 0% (CI 0-0.23) in Greece in March to 18.7% (CI 16.7-23.3%) in  
48 Sweden in June (median 4.5% (IQR 3.5-5.9%); n=34) (Supplementary Figure S2a).  
49  
50  
51  
52  
53  
54  
55  
56  
57  
58  
59  
60

1  
2  
3 Eighteen studies (17%) utilized blood donors as a proxy for the general population between February and  
4 December 2020, of which 16 were of high or medium quality. Seroprevalence estimates (n=42) in blood  
5 donors varied across countries, ranging from 0.4% in Germany between March and June (76) to 30% in  
6 Tensta (Stockholm) following a period of high incidence in June (81) (median 5.8% (IQR 2.1-5.7%) n=42)  
7 (Supplementary Figure S2b).  
8  
9  
10  
11  
12

13  
14  
15 Eight studies investigated the seroprevalence of SARS-CoV-2 in pregnant or parturient women, reporting  
16 estimates ranging from 2.6% (CI 1.7-4%) and 14.3% between March and June 2020 (median 6.9% (IQR  
17 5.1-12%); n=8) (102-108) (Supplementary Figure S2c). One study provided combined estimates of blood  
18 donors and pregnant women of 14.8% in Sweden between March and December (130).  
19  
20  
21  
22  
23  
24  
25

26 Fourteen studies provided 16 estimates from individuals seeking healthcare for non-COVID-19 related  
27 reasons and seven (50%) of these were medium or high quality. Estimates ranged from 0.3% in Zurich,  
28 Switzerland in March (129) to 36.2% in London in April (100) (median 4.1% (IQR 2.1-8.8%); n=16) from  
29 March to August 2020. The highest seroprevalence estimates (>10%) in this group were observed in three  
30 patient groups investigated following local widespread community transmission, oncology patients (31%)  
31 in Bergamo, Italy in April 2020 (92), oncology patients (31.4%) in Madrid between May and June 2020  
32 (98) and haemodialysis patients (36.2%) in London in April and May 2020 (100) and patients (38.5%) in  
33 Barcelona, Spain in April (128) (Supplementary Figure S2d).  
34  
35  
36  
37  
38  
39  
40  
41  
42  
43  
44

45 Forty-four (41%) studies reported seroprevalence estimates stratified by age. Seroprevalence estimates  
46 varied considerably across age groups and estimates tended to be lower in children (<18 years) (39, 41,  
47 52) and older age groups (>60 years) (36, 44, 50, 52, 69, 70, 132). Whilst a number of studies reported a  
48 high seroprevalence in older age groups (>55 years) (29, 35, 36, 44, 73, 78, 97, 125), some studies also  
49 reported a higher seroprevalence in younger age groups (<40 years) (41, 53, 73, 80). In studies that reported  
50 seroprevalence estimates by sex, similar seroprevalence results were observed between females and males  
51  
52  
53  
54  
55  
56  
57  
58  
59  
60

1  
2  
3 with the exception of a study in Italy (97), Russian Federation (46) and Kyrgyzstan (39) which each found  
4 a higher seroprevalence in females.  
5  
6

### 7 **Seroprevalence estimates over time**

8  
9 A number of studies provided seroprevalence estimates prior to, or at the early stages of the epidemic in  
10 the country (Supplementary Figure S3). Of these, overall study estimates were largely below 10%, however  
11 higher seroprevalence was noted in a number of population-specific, regional or local studies (16, 31, 32,  
12 35, 36, 92, 111, 113), with suggestion of earlier undetected transmission in some countries (39, 107, 119,  
13 130). A total of 16 studies reported seroprevalence estimates spanning multiple timepoints or stages of the  
14 epidemic (23, 26, 28, 49, 52, 53, 55, 58, 61, 64, 65, 68, 79, 82-87, 116, 120, 123, 128, 129). In a serial  
15 cross-sectional study in France (61), residual blood sampled before, during and after a national lockdown  
16 showed a seroprevalence of 0.41%, 4.14%, and 4.93%, respectively. In Georgia, in a community sample,  
17 an increase in seroprevalence from 0-1.3% in August 2020 to 35-51.3% in the same regions in December  
18 2020 was noted (28). A seroprevalence study in blood donors conducted in Milan between February and  
19 April 2020 during a period of intense transmission found an increase in seroprevalence from 2.7% (95%  
20 0.3-6.0%) to 5.2% (95% 2.4-9.0) , with an adjusted rate of increase in antibodies (IgG) of  $2.7 \pm 1.3\%$  per  
21 week as social distancing measures were gradually implemented (79). While in Finland, weekly testing of  
22 blood donors from April 2020 onwards showed a consistently low seroprevalence in the general population  
23 over time (0.28% (0.05–1.55) in early April 2020 to 0% (0–12.87) in late December 2020 (67).  
24  
25  
26  
27  
28  
29  
30  
31  
32  
33  
34  
35  
36  
37  
38  
39  
40  
41  
42

### 43 **Correlation between seroprevalence and cumulative incidence**

44  
45 The relationship between seroprevalence and reported SARS-CoV-2 laboratory confirmed cumulative case  
46 and deaths incidence was also explored. While seroprevalence from national studies correlated moderately  
47 with cumulative incidence (Spearman's rank correlation coefficient, 0.471) (Figure 4a), a stronger  
48 correlation was observed between seroprevalence estimates and cumulative SARS-CoV-2 deaths  
49 (Spearman's rank correlation coefficient, 0.666) (Figure 4b).  
50  
51  
52  
53  
54  
55  
56  
57  
58  
59  
60

## DISCUSSION

In this study we report the results of 111 studies, including 224 seroprevalence estimates from 26 countries in the WHO European Region undertaken until December 2020, prior to the implementation of national COVID-19 vaccine campaigns. A large variation in study methodologies was noted across the studies, with an overrepresentation of studies from high-income countries in Western Europe.

Overall, population-wide seroprevalence estimates were low (below 10%) across the Region early in 2020 before the onset of widespread community transmission and remained low across the Region throughout 2020, despite circulation of SARS-CoV-2 over this period. Higher estimates were observed at a regional or local level in populations that had experienced intense community transmission (up to 52%). Furthermore, a positive correlation between seroprevalence estimates and national cumulative incidence was observed, with a stronger correlation between seroprevalence and cumulative mortality.

The wide variation in seroprevalence estimates across the region are likely to reflect many factors including the differences in the population studied, local stage of the epidemic and the public health and social measures implemented in response to the epidemic at that time. The general low seroprevalence both at the start of the pandemic and at the end of 2020 is in line with a number of global systematic review conducted to date (133-136) and together indicate that the majority of the proportion of the population in the WHO European Region were and remain susceptible to infection one year after the identification of SARS-CoV-2 and prior to the start of national vaccination campaigns. In a global systematic review, Chen et al. estimated a seroprevalence of 4.2% (2.7-5.8) across the European Region until August 2020 (135) while Rostami et al. estimated a pooled prevalence of 3.17% (1.96-4.38), 4.41 % (2.20-6.61), 5.27% (3.97-6.57) in Western, Southern and Northern Europe, respectively (134). In the same period, Bobrovitz et al. reported a pooled estimate of 1.6% (1.1-5.2%) seroprevalence in studies conducted across Central Europe, Eastern Europe and Central Asia (137) and 12.2% (4.5-25.4%) from population-wide studies conducted until December 2020 (133).

1  
2  
3 A number of studies reported low seroprevalence in younger and older age groups, a finding observed in  
4 other systematic reviews (133, 135, 138). Such findings have important implications, as groups such as  
5 the elderly are at higher risk of severe outcome following infection – and lack of cross-protective immunity  
6 indicates that all age-groups will anticipate seeing high infection attack rates without implementation of  
7 measures such as vaccination of priority groups, together with strengthening of public health and social  
8 measures to reduce SARS-CoV-2 transmission.  
9  
10  
11  
12  
13  
14  
15  
16  
17

18 When reviewed alongside case notification data, seroprevalence estimates can provide greater insight into  
19 the local evolution of the pandemic. In this review, a positive correlation between seroprevalence estimates  
20 and national cumulative incidence in a number of countries was observed, suggesting that seroprevalence  
21 is a reflection of the duration and intensity of community transmission. It should be noted however that  
22 during the initial peak of infections in Europe in the spring of 2020, testing in many countries was not yet  
23 optimal and case notification data at this time are unlikely to provide a robust proxy for incidence in many  
24 instances. In line with this, several studies found seroprevalence estimates to be higher than the  
25 corresponding cumulative incidence of SARS-CoV-2 infections, suggesting a substantial under-  
26 ascertainment of infection through notifications, due to a number of factors including the asymptomatic or  
27 mild nature of disease, healthcare seeking behaviour, lack of testing capacity and testing and reporting  
28 strategies. Indeed, we also found a stronger association between seroprevalence and cumulative case  
29 mortality than cumulative case incidence, providing further evidence to support the suggestion of case  
30 under-ascertainment, as laboratory confirmed mortality surveillance for COVID-19 is likely to be more  
31 comprehensive.  
32  
33  
34  
35  
36  
37  
38  
39  
40  
41  
42  
43  
44  
45  
46  
47  
48  
49

50 The varying quality of studies in this review reflects the challenge of conducting seroepidemiological  
51 studies of high quality. Indeed, this review found that only 50% of all studies undertaken in the WHO  
52 European region in 2020 were aligned with the WHO Unity study initiative. Few of the national (n=5; 15%)  
53 or regional (n=2; 7%) studies were determined to be of high risk of bias, while 17 (34%) of studies  
54  
55  
56  
57  
58  
59  
60

1  
2  
3 conducted at a local level (cities or towns) were graded as such. This variation may be explained by the  
4 level of resources and epidemiological support available to studies conducted at the regional or national  
5 level.  
6  
7

8  
9 The majority of studies identified in this review utilised convenience rather than random sampling, which  
10 may have reduced the true representativeness of the estimates derived, though such convenience sampling  
11 is likely to provide a good estimate of population exposure for widely circulating viral infections. Many  
12 studies also included individuals that were not fully representative of the population under study, which  
13 may have introduced bias. For example, this review included studies that explored seroprevalence in the  
14 general population by utilising various proxy populations such as blood donors and residual blood. Blood  
15 donors are known to differ from the general population in that they are often a young, healthy adult  
16 population selected on the basis of lack of recent infection (139) and seroprevalence may therefore be over  
17 or underestimated in this group. Residual sera, on the other hand, derives from individuals who have sought  
18 health care and may therefore have pre-existing comorbidities or be at higher risk of SARS-CoV-2  
19 infection. However, we found that seroprevalence estimates for these distinct populations are in good  
20 agreement with the general population.  
21  
22  
23  
24  
25  
26  
27  
28  
29  
30  
31  
32  
33  
34  
35  
36

37 We also found that there was a high degree of heterogeneity across serological assays used. The majority  
38 of studies used commercial tests of varying sensitivity and specificity to detect SARS-CoV-2 targeted  
39 antibodies, although some of these assays have now been shown to have excellent performance (140, 141).  
40 However, under half of studies performed independent validation of these kits with internal controls and  
41 serum panels and only 25% accounted for the sensitivity and specificity of the tests in their statistical  
42 analyses. As SARS-CoV-2 serological tests have been found to have variable test performance (140, 141),  
43 independent validation at local level in combination with use of an WHO International Standard and  
44 Reference Panel for anti-SARS-CoV-2 antibody has been widely promoted as part of the Solidarity II  
45 initiative (142, 143). Other options include the Joint Research Centre (144) reference materials for the  
46 quality control of SARS-CoV-2 antibody tests. Use of these materials will allow for the potential correction  
47  
48  
49  
50  
51  
52  
53  
54  
55  
56  
57  
58  
59  
60

1  
2  
3 for sensitivity and specificity during the statistical analysis, would allow for more robust estimates and  
4  
5 greater comparability among countries in the region.  
6  
7

8  
9 Overall, the findings of this review highlight the need for international collaboration to standardise  
10 approaches and support countries in conducting robust comparable studies. WHO, in collaboration with  
11 technical partners, has developed the Unity studies (15)(90), a global seroepidemiology standardization  
12 initiative for COVID-19, which aims to increase quality evidence-based knowledge in country and regions  
13 for action through the availability of standardized seroepidemiology investigation protocols and antibody  
14 assays. A primary aim of this global initiative is the provision of direct support to countries to develop  
15 country specific protocols, with particular attention provided to low- and middle- income countries  
16 (LMICs), and to support aggregation, comparison and analysis of robust Unity-aligned studies through  
17 strong coordination between WHO Country offices, Regional offices and Headquarters. A large proportion  
18 of the studies identified in this systematic review were conducted in Western European countries, with a  
19 relative scarcity of seroprevalence studies from other countries by the end of 2020, an observation noted in  
20 other systematic reviews (133-135, 138). This highlights the urgent need for enhanced capacity, the  
21 provision of additional support to LMICs and the sharing of information to address the gap in knowledge  
22 and tackle research inequity. To counteract the skewedness in the WHO European Region, the WHO Unity  
23 protocols have been widely promoted by WHO and ECDC and technical support has been provided to tailor  
24 the protocols to local contexts, together with laboratory and financial support to LMICs. In addition, WHO  
25 and ECDC jointly established a network of approximately 300 public health professionals to facilitate  
26 discussions in related to SARS-CoV-2 seroprevalence, promote timely sharing of results and knowledge  
27 and further build capacity in the WHO European Region.  
28  
29  
30  
31  
32  
33  
34  
35  
36  
37  
38  
39  
40  
41  
42  
43  
44  
45  
46  
47  
48  
49  
50

51 This systematic review comprehensively describes the seroprevalence of SARS-CoV-2 in the first year of  
52 the pandemic, prior to the widespread implementation of national vaccine programs. With the inclusion of  
53 as yet unpublished data from LMICs, this review contributes to research equity across Member States  
54  
55  
56  
57  
58  
59  
60



1  
2  
3 income levels and provides a more representative overview of the situation in the WHO European Region  
4 than would published studies alone. In addition, we evaluated the UNITY study alignment of studies to  
5 assess quality and comparability.  
6  
7

8  
9 This review has some limitations. Firstly, there was significant heterogeneity among the studies, including  
10 sampling frame, population and stage of epidemic at time of serosurvey, which makes comparability across  
11 studies difficult. Due to such heterogeneity, we opted to not provide one pooled estimate nor conduct a  
12 meta-analysis, as interpretation would be difficult and may not accurately reflect the picture in the WHO  
13 European Region. Secondly, while population-based serological surveys can provide a more accurate  
14 estimation of the overall rates of SARS-CoV-2 infection within a population, this approach does not  
15 consider antibody waning, which cannot be easily accounted for as antibody levels vary depending on  
16 disease severity (145) and longevity is expected to vary greatly across SARS-CoV-2 infected individuals  
17 (146). In addition, while seroprevalence studies provide an estimate of population exposure, seropositivity  
18 is not the only predictor of susceptibility to infection. Finally, due to the rapid accumulation of data related  
19 to SARS-CoV-2 seroepidemiology and the advent of the 'preprint era', not all included studies have been  
20 published and may therefore be subject to change upon peer review.  
21  
22  
23  
24  
25  
26  
27  
28  
29  
30  
31  
32  
33  
34  
35

## 36 Conclusion

37  
38 As SARS-CoV-2 continues to circulate, understanding the population seropositivity remains critical for  
39 policymakers and public health officials to make informed decisions on optimal public health interventions,  
40 such as lifting or tightening of restrictions and targeted vaccination (10, 147). In this study, we found  
41 evidence that SARS-CoV-2 antibody seroprevalence across the WHO European Region was low prior to  
42 widespread circulation and remained low in the general population during 2020. This suggests that much  
43 of the population remained susceptible to infection prior to the implementation of national COVID-19  
44 vaccine campaigns from early 2021 onwards. We also found variation in seroprevalence estimates between  
45 and within countries during 2020, with evidence of increased prevalence in areas following high levels of  
46 transmission and some association with incidence and mortality trends over time. It is clear that antibody-  
47  
48  
49  
50  
51  
52  
53  
54  
55  
56  
57  
58  
59  
60



1  
2  
3 mediated 'herd immunity' through natural infection is not attainable in most countries and COVID-19  
4  
5 vaccines should continue to be distributed widely and equitably to protect priority groups and the wider  
6  
7 population. Given the issue of antibody waning, all efforts must be also directed towards well-informed and  
8  
9 evidence-based implementation and maintenance of non-pharmaceutical interventions at a local and  
10  
11 national level to stem any future waves of the pandemic. Indeed, as vaccine programs continue to be  
12  
13 implemented, standardised seroprevalence studies will be instrumental to evaluate both natural and vaccine  
14  
15 derived immunity overtime to guide public health actions and decision making.  
16  
17

18 Seroprevalence studies have been of great value to COVID-19 pandemic response efforts, providing  
19  
20 estimates of the true extent and dynamics of SARS-CoV-2 infection overtime and the lessons identified  
21  
22 from COVID-19, in particular the need for standardised global serosurveillance systems, will inform future  
23  
24 pandemic preparedness.  
25  
26  
27  
28  
29  
30  
31  
32  
33  
34  
35  
36  
37  
38  
39  
40  
41  
42  
43  
44  
45  
46  
47  
48  
49  
50  
51  
52  
53  
54  
55  
56  
57  
58  
59  
60

## Data sharing

The unpublished data supporting the findings of this study are available on the open source Zenodo repository <https://zenodo.org/communities/unity-sero-2021?page=1&size=20>.

## Supplementary material

Supplementary material file is attached

## Registration and protocol

Not registered. A protocol was not prepared

## Declaration of interests

No competing interests

## Funding

This work was supported by WHO through funding from the WHO Solidarity Response Fund and the German Federal Ministry of Health COVID-19 Research and Development.

## Ethics statement

This systematic review of study data did not require ethical approval. This study does not involve human participants nor animal subjects.

## Authors' Contributions

Conceptualisation: AV, ED, GF, RP, MK, PP, AN, MV, IB, LS, EB; Data curation: AV, GF, ED, MK, DL; Formal analysis: AV, GF, ED, MK; Investigation: AV, GF, ED, MK, AN, MV; Methodology: AV, GF, ED, MK, AN, MV, RP, PP, EB; Supervision: AV, GF, ED, MK, RP, PP; Writing – original draft: AV, ED, GF, RP, MK, PP, IB, LS, AN, MV, EB; Writing – review & editing: All authors

## Acknowledgements

The authors alone are responsible for the views expressed in this publication and they do not necessarily represent the decisions, policy, or views of WHO or ECDC. The authors would like to acknowledge the Principle Investigators of Unity-aligned studies who have kindly shared their unpublished data: Bosnia and Herzegovina: Dejan Bokonjić (University of East Sarajevo Faculty of Medicine Foča, Bosnia and Herzegovina (Republic of Srpska)), Elma Catovic Baralija (Institute for Transfusion Medicine of the Federation of Bosnia and Herzegovina, Sarajevo, Bosnia and Herzegovina), Sanjin Musa (Institute for Public Health of the Federation of Bosnia and Herzegovina, Sarajevo, Bosnia and Herzegovina (Federation of Bosnia and Herzegovina)), Ranko Škrbić (Medical Faculty in Banja Luka, Bosnia and Herzegovina (Republic of Srpska)); Bulgaria: Angel Kunchev

(Ministry of Health of the Republic of Bulgaria), Savina Stoitsova (National Center of Infectious and Parasitic Diseases); Georgia: Olga Tarkhan-Mouravi (National Center for Disease Control and Public Health Georgia, Head of Vaccine-Preventable and Respiratory Diseases Division, Georgia); Kyrgyzstan: Tatyana Kuchuk (Republican Scientific and Practical Center for Laboratory Diagnostic Quality Control of infectious diseases, Ministry of Health of the Kyrgyz Republic, Kyrgyzstan), Nurmatov Zuridin (Republican Scientific and Practical Center for Control of Viral Infections, Ministry of Health of the Kyrgyz Republic, Kyrgyzstan); Republic of Moldova: Alexei Ceban (National Agency for Public Health, Chişinău, Republic of Moldova). We would also like to thank Céline Roman (WHO EURO), Jeffrey Pires (WHO EURO), Tjede Funk (ECDC) and Tommi Karki (ECDC) for data collection, analysis and visualization; Tomas Allen and the WHO HQ library team for developing the search strategy; SeroTracker (Mairead Whelan, Zihan Li, Niklas Bobrovitz, Harriet Ware and Rahul K Arora) and WHO HQ colleagues (Hannah Lewis and Brianna Cheng); and all ECDC, WHO Headquarters, Regional and Country Office colleagues who contributed to this work. The authors are alone responsible for the views expressed in this publication and they do not necessarily represent the decisions or policies of the WHO or ECDC.

## Figure Legend

**Figure 1:** PRISMA Flow chart of SARS-CoV-2 seroprevalence study selection

**Figure 2:** Geographical distribution of SARS-CoV-2 seroprevalence studies published in the WHO European Region between 1 Jan – 31 Dec 2020

**Table 1:** Study characteristics

**Figure 3:** National (a) and sub-national (b) seroprevalence estimates of SARS-CoV-2 antibodies over time in the WHO European Region (1/1/2020-31/12/2021)

**Figure 4:** Correlation between seroprevalence point estimates from low to medium risk of bias studies and cumulative (a) incidence and (b) deaths in all populations, in the WHO European Region (1/1/2020-31/12/2020)

**Table S1** Inclusion and exclusion criteria

**Table S2:** Description of the quality assessment criteria used

**Table S3:** Characteristics of eligible seroprevalence studies

**Supplementary figure S1:** Forest plot of the seroprevalence of SARS-CoV-2 antibodies in Community/Household samples with corresponding 95% confidence intervals in WHO European Region (1/1/2020-31/12/2020)

**Supplementary figure S2:** Forest plot of the seroprevalence of SARS-CoV-2 antibodies in (Top to bottom, Left to Right) a) Residual sera b) Blood donors c) Pregnant or Parturient women d) Patients seeking care (non-COVID) and e) Other populations

1  
2  
3 **Supplementary figure S3:** Time point of conducted sero-epidemiology studies in relation to country  
4 epidemic activity  
5  
6  
7  
8  
9  
10  
11  
12  
13  
14  
15  
16  
17  
18  
19  
20  
21  
22  
23  
24  
25  
26  
27  
28  
29  
30  
31  
32  
33  
34  
35  
36  
37  
38  
39  
40  
41  
42  
43  
44  
45  
46  
47  
48  
49  
50  
51  
52  
53  
54  
55  
56  
57  
58  
59  
60

For peer review only

## References

1. World Health Organization; 2021. WHO Coronavirus Disease (COVID-19) Dashboard. Available from: <https://covid19.who.int/>.
2. Cheng MP, Papenburg J, Desjardins M, Kanjilal S, Quach C, Libman M, et al. Diagnostic Testing for Severe Acute Respiratory Syndrome-Related Coronavirus 2: A Narrative Review. *Ann Intern Med*. 2020;172(11):726-34.
3. Byambasuren O, Cardona M, Bell K, Clark J, McLaws M-L, Glasziou P. Estimating the extent of asymptomatic COVID-19 and its potential for community transmission: Systematic review and meta-analysis. *Official Journal of the Association of Medical Microbiology and Infectious Disease Canada*. 2020;5(4):223-34.
4. Koh WC, Naing L, Chaw L, Rosledzana MA, Alikhan MF, Jamaludin SA, et al. What do we know about SARS-CoV-2 transmission? A systematic review and meta-analysis of the secondary attack rate and associated risk factors. *PLOS ONE*. 2020;15(10):e0240205.
5. Buitrago-Garcia D, Egli-Gany D, Counotte MJ, Hossmann S, Imeri H, Ipekci AM, et al. Occurrence and transmission potential of asymptomatic and presymptomatic SARS-CoV-2 infections: A living systematic review and meta-analysis. *PLoS Med*. 2020;17(9):e1003346.
6. Tanne JH. Covid-19: US cases are greatly underestimated, seroprevalence studies suggest. *BMJ*. 2020;370:m2988.
7. Wajnberg A, Mansour M, Leven E, Bouvier NM, Patel G, Firpo-Betancourt A, et al. Humoral response and PCR positivity in patients with COVID-19 in the New York City region, USA: an observational study. *The Lancet Microbe*. 2020;1(7):e283-e9.
8. Khoury DS, Cromer D, Reynaldi A, Schlub TE, Wheatley AK, Juno JA, et al. Neutralizing antibody levels are highly predictive of immune protection from symptomatic SARS-CoV-2 infection. *Nature Medicine*. 2021;27(7):1205-11.
9. Earle KA, Ambrosino DM, Fiore-Gartland A, Goldblatt D, Gilbert PB, Siber GR, et al. Evidence for antibody as a protective correlate for COVID-19 vaccines. *Vaccine*. 2021;39(32):4423-8.
10. Murhekar MV, Clapham H. COVID-19 serosurveys for public health decision making. *The Lancet Global Health*. 2021;9(5):e559-e60.
11. Page MJ, McKenzie JE, Bossuyt PM, Boutron I, Hoffmann TC, Mulrow CD, et al. The PRISMA 2020 statement: an updated guideline for reporting systematic reviews. *BMJ*. 2021;372:n71.
12. Ouzzani M, Hammady H, Fedorowicz Z, Elmagarmid A. Rayyan — a web and mobile app for systematic reviews. 2016;5(210).
13. Munn Z, Moola S, Lisy K, Riitano D, Tufanaru C. Methodological guidance for systematic reviews of observational epidemiological studies reporting prevalence and cumulative incidence data. *JBI Evidence Implementation*. 2015;13(3):147-53.
14. Van Walle I, Leitmeyer K, Broberg EK. Meta-analysis of the clinical performance of commercial SARS-CoV-2 nucleic acid, antigen and antibody tests up to 22 August 2020. *medRxiv*. 2020:2020.09.16.20195917.
15. Bergeri I, Lewis HC, Subissi L, Nardone A, Valenciano M, Cheng B, et al. Early epidemiological investigations: World Health Organization UNITY protocols provide a standardized and timely international investigation framework during the COVID-19 pandemic. *Influenza Other Respir Viruses*. 2021;1- 7. .
16. Knabl L, Mitra T, Kimpel J, Rössler A, Volland A, Walser A, et al. High SARS-CoV-2 seroprevalence in children and adults in the Austrian ski resort of Ischgl. *Communications Medicine*. 2021;1(1):4.

17. Wagner A, Guzek A, Ruff J, Jasinska J, Scheikl U, Zwazl I, et al. A longitudinal seroprevalence study in a large cohort of working adults reveals that neutralising SARS-CoV-2 RBD-specific antibodies persist for at least six months independent of the severity of symptoms. medRxiv. 2020:2020.12.22.20248604.
18. Ladage D, Höglinger Y, Ladage D, Adler C, Yalcin I, Braun RJ. SARS-CoV-2 antibody prevalence and symptoms in a local Austrian population. medRxiv. 2020:2020.11.03.20219121.
19. Boey L, Roelants M, Merckx J, Hens N, Desombere I, Duysburgh E, et al. Age-dependent seroprevalence of SARS-CoV-2 antibodies in school-aged children from areas with low and high community transmission. *European Journal of Pediatrics*. 2021.
20. [dataset] Bokonjic D. A national study of seroprevalence of COVID-19 infection in the population of the Republika Srpska 2020. WHO Unity Studies Global SARS-CoV-2 Seroepidemiological Investigations. Data repository for unpublished datasets for the WHO Unity Initiative. 4 November, 2021 <https://zenodo.org/communities/unity-sero-2021?page=1&size=20>.
21. De første foreløbige resultater af undersøgelsen for COVID-19 i befolkningen er nu klar. Statens Serum Institut; 2020. 01/01/2021. Available from: <https://www.ssi.dk/aktuelt/nyheder/2020/de-forste-forelobige-resultater-af-undersogelsen-for-covid-19-i-befolkningen-er-nu-klar>
22. New preliminary results from the representative seroprevalence study of COVID-19. Statens Serum Institute; 2020. 01/01/2021. Available from: [https://files.ssi.dk/notat\\_foreloebige\\_resultater\\_pilotundersogelse\\_seropraevalens\\_COVID-19\\_29\\_6\\_2020](https://files.ssi.dk/notat_foreloebige_resultater_pilotundersogelse_seropraevalens_COVID-19_29_6_2020)
23. COVID-19: The National Prevalence Survey. Results of antibody test with 18,000 invited participants, week 34-36. . Statens Serum Institut; 2020 07/10/2020. 07/10/2020. Accessed: Available from: <https://www.ssi.dk/-/media/arkiv/dk/aktuelt/nyheder/2020/notat---covid-19-prvalensundersgelsen.pdf?la=da>
24. Petersen MS, Strom M, Christiansen DH, Fjallsbak JP, Eliassen EH, Johansen M, et al. Seroprevalence of SARS-CoV-2-Specific Antibodies, Faroe Islands. *Emerg Infect Dis*. 2020;26(11):2761-3.
25. Jõgi P, Soeorg H, Ingerainen D, Soots M, Lättekivi F, Naaber P, et al. Seroprevalence of SARS-CoV-2 IgG antibodies in two regions of Estonia (KoroSero-EST-1). medRxiv. 2020:2020.10.21.20216820.
26. Koronaepidemiaan väestöserologiatutkimuksen viikkoraportti. Finnish Institute for Health and Welfare – THL 2021. 01/01/2021. Available from: [https://www.thl.fi/roko/cov-vaestoserologia/sero\\_report\\_weekly.html](https://www.thl.fi/roko/cov-vaestoserologia/sero_report_weekly.html)
27. Carrat F, de Lamballerie X, Rahib D, Blanché H, Lapidus N, Artaud F, et al. Seroprevalence of SARS-CoV-2 among adults in three regions of France following the lockdown and associated risk factors: a multicohort study. medRxiv. 2020:2020.09.16.20195693.
28. [dataset] Mouravi-Tarkhan O. Sero-epidemiological Cross-sectional investigation on COVID-19 virus infection in Georgia. 2020. 15 November, 2021. WHO Unity Studies Global SARS-CoV-2 Seroepidemiological Investigations. Data repository for unpublished datasets for the WHO Unity Initiative. November 4, 2021 <https://zenodo.org/communities/unity-sero-2021?page=1&size=20>.
29. Tsertsvadze T, Gatsrelia L, Mirziashvili M, Dvali N, Abutidze A, Metchurchlishvili R, et al. SARS-CoV-2 antibody seroprevalence in Tbilisi, the capital city of country of Georgia. medRxiv. 2020:2020.09.18.20195024.
30. Aziz NA, Corman VM, Echterhoff AKC, Müller MA, Richter A, Schmandke A, et al. Seroprevalence and correlates of SARS-CoV-2 neutralizing antibodies from a population-based study in Bonn, Germany. *Nature Communications*. 2021;12(1):2117.
31. Streeck H, Schulte B, Kummerer BM, Richter E, Holler T, Fuhrmann C, et al. Infection fatality rate of SARS-CoV2 in a super-spreading event in Germany. *Nat Commun*. 2020;11(1):5829.

- 1  
2  
3 32. Santos-Hövenner C, Neuhauser HK, Rosario AS, Busch M, Schlaud M, Hoffmann R, et al. Serology- and PCR-based cumulative incidence of SARS-CoV-2 infection in adults in a successfully contained early hotspot (CoMoLo study), Germany, May to June 2020. *Euro surveill.* 2020;25(47).
- 4  
5  
6 33. Weis S, Scherag A, Baier M, Kiehntopf M, Kamradt T, Kolanos S, et al. Antibody response using six different serological assays in a completely PCR-tested community after a coronavirus disease 2019 outbreak—the CoNAN study. *Clinical Microbiology and Infection.* 2021;27(3):470.e1-e9.
- 7  
8  
9  
10  
11 34. Merkely B, Szabo AJ, Kosztin A, Berenyi E, Sebestyén A, Lengyel C, et al. Novel coronavirus epidemic in the Hungarian population, a cross-sectional nationwide survey to support the exit policy in Hungary. *Geroscience.* 2020;42(4):1063-74.
- 12  
13  
14 35. Pagani G, Conti F, Giacomelli A, Bernacchia D, Rondanin R, Prina A, et al. Seroprevalence of SARS-CoV-2 significantly varies with age: Preliminary results from a mass population screening. *Journal of Infection.* 2020;81(6):E10-E2.
- 15  
16  
17 36. Stefanelli P, Bella A, Fedele G, Pancheri S, Leone P, Vacca P, et al. Prevalence of SARS-CoV-2 IgG antibodies in an area of northeastern Italy with a high incidence of COVID-19 cases: a population-based study. *Clin microbiol infect.* 2020.
- 18  
19  
20  
21 37. Guerriero M, Bisoffi Z, Poli A, Micheletto C, Pomari C. Prevalence of asymptomatic SARS-CoV-2-positive individuals in the general population of northern Italy and evaluation of a diagnostic serological ELISA test: a cross-sectional study protocol. *BMJ Open.* 2020;10(10):e040036-e.
- 22  
23  
24 38. Cito F, Amato L, Di Giuseppe A, Danzetta ML, Iannetti S, Petrini A, et al. A COVID-19 Hotspot Area: Activities and Epidemiological Findings. *Microorganisms.* 2020;8(11):1711-.
- 25  
26  
27 39. [dataset] Zuridin N, Tatyana K. Population-based age-stratified seroepidemiological investigation protocol for coronavirus 2019 (COVID-19) infection in Kyrgyz Republic. 2020. 4 November 2021. WHO Unity Studies Global SARS-CoV-2 Seroepidemiological Investigations. Data repository for unpublished datasets for the WHO Unity Initiative. November 4, 2021 <https://zenodo.org/communities/unity-sero-2021?page=1&size=20>.
- 28  
29  
30  
31  
32 40. Snoeck CJ, Vaillant M, Abdelrahman T, Satagopam VP, Turner JD, Beaumont K, et al. Prevalence of SARS-CoV-2 infection in the Luxembourgish population: the CON-VINCE study.
- 33  
34 41. Vos ERA, den Hartog G, Schepp RM, Kaaijk P, van Vliet J, Helm K, et al. Nationwide seroprevalence of SARS-CoV-2 and identification of risk factors in the general population of the Netherlands during the first epidemic wave. *J epidemiol community health (1979).* 2020.
- 35  
36  
37 42. Popova Ezhlova, Melânikova AA, Balakhonov SV, Chesnokova MV, Dubrovina VI, Lyalina LV, et al. Experience in studying seroprevalence to SARS-CoV-2 virus in the population of the Irkutsk Region during COVID-19 outbreak. *Problemy Osobo Opasnykh Infektsii.* 2020(3):106-13.
- 38  
39  
40 43. Popova Ezhlova, Melânikova AA, Historik OA, Mosevich OS, Lyalina LV, Smirnov VS, et al. Assessment of the herd immunity to SARS-CoV-2 among the population of the Leningrad region during the COVID-19 epidemic. *Problemy Osobo Opasnykh Infektsii.* 2020(3):114-23.
- 41  
42  
43 44. Barchuk A, Skougarevskiy D, Titaev K, Shirokov D, Raskina Y, Novkunkskaya A, et al. Seroprevalence of SARS-CoV-2 antibodies in Saint Petersburg, Russia: a population-based study. *Scientific Reports.* 2021;11(1):12930.
- 44  
45  
46 45. Popova Ezhlova, Melânikova AA, Bashketova NS, Fridman RK, Lyalina LV, Smirnov VS, et al. Herd immunity to SARS-CoV-2 among the population in Saint-Petersburg during the COVID-19 epidemic. *Problemy Osobo Opasnykh Infektsii.* 2020(3):124-30.
- 47  
48  
49 46. Popova Ezhlova, Yu EBA, Melnikova AA, Stepanova TF, Sharukho GV, Letyushev AN, et al. Distribution of SARS-CoV-2 seroprevalence among residents of the Tyumen Region during the COVID-19 epidemic period. *Journal of microbiology, epidemiology and immunobiology. Journal of Microbiology Epidemiology Immunobiology.* 2020;97(5):392-400.
- 50  
51  
52  
53  
54  
55  
56  
57  
58  
59  
60



- 1  
2  
3 47. Pollan M, Perez-Gomez B, Pastor-Barriuso R, Oteo J, Hernan MA, Perez-Olmeda M, et al.  
4 Prevalence of SARS-CoV-2 in Spain (ENE-COVID): a nationwide, population-based seroepidemiological  
5 study. *Lancet*. 2020;396(10250):535-44.  
6  
7 48. Förekomsten av antikroppar mot SARS-CoV-2 i stadsdelen Rinkeby-Kista, Stockholm, 22–24  
8 juni 2020. Public Health Agency of Sweden; 2020 04/09/2020. Report No.: 20129 04/09/2020.  
9 Accessed:01/01/2021. Available from:  
10 <https://www.folkhalsomyndigheten.se/contentassets/2cf102cd299c4382b9a0447dc0626356/foreko>  
11 [msten-antikroppar-rinkeby-kista.pdf](https://www.folkhalsomyndigheten.se/contentassets/2cf102cd299c4382b9a0447dc0626356/foreko)  
12  
13 49. Roxhed N, Bendes A, Dale M, Mattsson C, Hanke L, Dodig-Crnković T, et al. Multianalyte  
14 serology in home-sampled blood enables an unbiased assessment of the immune response against  
15 SARS-CoV-2. *Nature Communications*. 2021;12(1):3695.  
16  
17 50. Richard A, Wisniak A, Perez-Saez J, Garrison-Desany H, Petrovic D, Piumatti G, et al.  
18 Seroprevalence of anti-SARS-CoV-2 IgG antibodies, risk factors for infection and associated symptoms  
19 in Geneva, Switzerland: a population-based study. *medRxiv*. 2020:2020.12.16.20248180.  
20  
21 51. Bi Q, Lessler J, Eckerle I, Lauer SA, Kaiser L, Vuilleumier N, et al. Household Transmission of  
22 SARS-COV-2: Insights from a Population-based Serological Survey. 2020.  
23  
24 52. Stringhini S, Wisniak A, Piumatti G, Azman AS, Lauer SA, Baysson H, et al. Seroprevalence of  
25 anti-SARS-CoV-2 IgG antibodies in Geneva, Switzerland (SEROCoV-POP): a population-based study.  
26 *The Lancet*. 2020;396(10247):313-9.  
27  
28 53. Ward H, Cooke G, Atchison C, Whitaker M, Elliott J, Moshe M, et al. Declining prevalence of  
29 antibody positivity to SARS-CoV-2: a community study of 365,000 adults. *medRxiv*.  
30 2020:2020.10.26.20219725.  
31  
32 54. Wells PM, Doores KJ, Couvreur S, Nunez RM, Seow J, Graham C, et al. Estimates of the rate of  
33 infection and asymptomatic COVID-19 disease in a population sample from SE England. *Journal of*  
34 *Infection*. 2020.  
35  
36 55. Herzog S, De Bie J, Abrams S, Wouters I, Ekinci E, Patteet L, et al. Seroprevalence of IgG  
37 antibodies against SARS coronavirus 2 in Belgium – a serial prospective cross-sectional nationwide  
38 study of residual samples (March – October 2020). *medRxiv*. 2021:2020.06.08.20125179.  
39  
40 56. Tsaneva-Damyanova D. SARS-CoV-2: seroepidemiological pattern in northeastern Bulgaria.  
41 *Biotechnology & Biotechnological Equipment*. 2020;34(1):441-6.  
42  
43 57. Bloomfield M, Pospisilova I, Cabelova T, Sediva A, Ibrahimova M, Borecka K, et al. Searching  
44 for COVID-19 Antibodies in Czech Children – A Needle in the Haystack. *Frontiers in Pediatrics*.  
45 2020;8.  
46  
47 58. Lenicek K, J., Zrinski Topic R, Stevanovic V, Lukic-Grlic A, Tabain I, Misak Z, et al.  
48 Seroprevalence of SARS-CoV-2 infection among children in Children's Hospital Zagreb during the  
49 initial and second wave of COVID-19 pandemic in Croatia. (1846-7482 (Electronic)).  
50  
51 59. Capai L, Ayhan N, Masse S, Canarelli J, Priet S, Simeoni M-H, et al. Seroprevalence of SARS-  
52 CoV-2 IgG Antibodies in Corsica (France), April and June 2020. *Journal of Clinical Medicine*.  
53 2020;9(11):3569-.  
54  
55 60. Cohen R, Jung C, Ouldali N, Sellam A, Batard C, Cahn-Sellem F, et al. Assessment of spread of  
56 SARS-CoV-2 by RT-PCR and concomitant serology in children in a region heavily affected by COVID-19  
57 pandemic. *medRxiv*. 2020:2020.06.12.20129221.  
58  
59 61. Le Vu S, Jones G, Anna F, Rose T, Richard J-B, Bernard-Stoecklin S, et al. Prevalence of SARS-  
60 CoV-2 antibodies in France: results from nationwide serological surveillance. *Nature*  
61 *Communications*. 2021;12(1):3025.  
62  
63 62. Bogogiannidou Z, Vontas A, Dadouli K, Kyritsi MA, Soteriades S, Nikoulis DJ, et al. Repeated  
64 leftover serosurvey of SARS-CoV-2 IgG antibodies, Greece, March and April 2020. *Euro surveill*.  
65 2020;25(31).



- 1  
2  
3 63. Gudbjartsson DF, Norddahl GL, Melsted P, Gunnarsdottir K, Holm H, Eythorsson E, et al. Humoral Immune Response to SARS-CoV-2 in Iceland. *N Engl J Med.* 2020;383(18):1724-34.
- 4 64. Sweden PHAo. Påvisning av antikroppar efter genomgången COVID-19 i blodprov från  
5 öppenvården (Delrapport 1). 2020. Available from:  
6 <https://www.folkhalsomyndigheten.se/publicerat-material/publikationsarkiv/p/pavisning-av-antikroppar-efter-genomgangen-covid-19-i-blodprov-fran-oppenvarden-delrapport-1/>  
7  
8  
9  
10 65. Påvisning av antikroppar efter genomgången COVID-19 hos blodgivare (Delrapport 2). Public  
11 Health Agency of Sweden (Folkhälsomyndigheten); 2020. 01/06/2021. Available from:  
12 <https://www.folkhalsomyndigheten.se/publicerat-material/publikationsarkiv/p/pavisning-av-antikroppar-efter-genomgangen-covid-19-hos-blodgivare-delrapport-2/>  
13  
14 66. Posfay-Barbe KM, Andrey DO, Virzi J, Cohen P, Pigny F, Goncalves AR, et al. Prevalence of IgG  
15 against SARS-CoV-2 and evaluation of a rapid MEDsan IgG test in children seeking medical care. *Clin*  
16 *infect dis.* 2020.
- 17 67. Dickson E, Palmateer NE, Murray J, Robertson C, Waugh C, Wallace LA, et al. Enhanced  
18 surveillance of COVID-19 in Scotland: population-based seroprevalence surveillance for SARS-CoV-2  
19 during the first wave of the epidemic. *Public health.* 2021;190:132-4.
- 20 68. Enhanced Surveillance of COVID-19 in Scotland: Population-based seroprevalence  
21 surveillance Public Health Scotland; 2020 30 September 2020. 30 September 2020.  
22 Accessed:01/01/2021. Available from: <https://publichealthscotland.scot/publications/enhanced-surveillance-of-covid-19-in-scotland/enhanced-surveillance-of-covid-19-in-scotland-population-based-seroprevalence-surveillance-30-september-2020/>  
23  
24  
25  
26 69. [dataset] Sanjin Musa, Elma Catovic Baralija, Mia Blazevic, Seila Cilovic-Lagarija, Gorana  
27 Ahmetovic-Karic, Alma Ljuca, et al. Seroepidemiological investigation for coronavirus 2019 (COVID-  
28 19) infection in the Federation of Bosnia and Herzegovina. 2020. WHO Unity Studies Global SARS-  
29 CoV-2 Seroepidemiological Investigations. Data repository for unpublished datasets for the WHO  
30 Unity Initiative. November 4, 2021 <https://zenodo.org/communities/unity-sero-2021?page=1&size=20>.  
31  
32  
33 70. Pedersen OB, Nissen J, Dinh KM, Schwinn M, Kaspersen KA, Boldsen JK, et al. SARS-CoV-2  
34 infection fatality rate among elderly retired Danish blood donors - A cross-sectional study. *Clin infect*  
35 *dis.* 2020.
- 36 71. Erikstrup C, Hother CE, Pedersen OBV, Mølbak K, Skov RL, Holm DK, et al. Estimation of SARS-  
37 CoV-2 Infection Fatality Rate by Real-time Antibody Screening of Blood Donors. *Clinical Infectious*  
38 *Diseases.* 2020;72(2):249-53.
- 39 72. Danmark Bi. Bloddonorere testes for overstået infektion med coronavirus. Bloddonorerne i  
40 Danmark; 2020. 01/01/2021. Available from: [www.bloddonor.dk/coronavirus/](http://www.bloddonor.dk/coronavirus/)  
41  
42 73. Gallian P, Pastorino B, Morel P, Chiaroni J, Ninove L, de Lamballerie X. Lower prevalence of  
43 antibodies neutralizing SARS-CoV-2 in group O French blood donors. *Antiviral Res.* 2020;181:104880-.
- 44 74. Grzelak L, Temmam S, Planchais C, Demeret C, Tondeur L, Huon Cl, et al. A comparison of four  
45 serological assays for detecting anti-SARS-CoV-2 antibodies in human serum samples from different  
46 populations. *Sci transl med.* 2020;12(559).
- 47 75. Fischer B, Knabbe C, Vollmer T. SARS-CoV-2 IgG seroprevalence in blood donors located in  
48 three different federal states, Germany, March to June 2020. *Euro surveill.* 2020;25(28).
- 49 76. Runkel S, Kowalzik F, Gehring S, Winter J, Grandt CL, Marron M, et al. Prevalence of Severe  
50 Acute Respiratory Syndrome Coronavirus-2-specific Antibodies in German Blood Donors during the  
51 COVID-19 Pandemic. *Clin lab.* 2020;66(10).
- 52 77. Percivalle E, Cambiè G, Cassaniti I, Nepita EV, Maserati R, Ferrari A, et al. Prevalence of SARS-  
53 CoV-2 specific neutralising antibodies in blood donors from the Lodi Red Zone in Lombardy, Italy, as  
54 at 06 April 2020. *Euro surveill.* 2020;25(24).  
55  
56  
57  
58  
59  
60

- 1  
2  
3 78. Fiore JR, Centra M, De Carlo A, Granato T, Rosa A, Sarno M, et al. Results from a survey in  
4 healthy blood donors in South Eastern Italy indicate that we are far away from herd immunity to  
5 SARS-CoV-2. *J med virol.* 2020.
- 6 79. Valenti L, Bergna A, Pelusi S, Facciotti F, Lai A, Tarkowski M, et al. SARS-CoV-2 seroprevalence  
7 trends in healthy blood donors during the COVID-19 Milan outbreak.
- 8 80. Slot E, Hogema BM, Reusken Reimerink JHC, Molier M, Karregat JHM, J Novotný VMJJ, et  
9 al. Low SARS-CoV-2 seroprevalence in blood donors in the early COVID-19 epidemic in the  
10 Netherlands. *Nat Commun.* 2020;11(1):5744-.
- 11 81. Lundkvist Å, Hanson S, Olsen B. Pronounced difference in Covid-19 antibody prevalence  
12 indicates cluster transmission in Stockholm, Sweden. *Infection Ecology & Epidemiology.*  
13 2020;10(1):1806505.
- 14 82. Weekly Coronavirus Disease 2019 (COVID-19) Surveillance Report: Week 22. Public Health  
15 England; 2020. 01/01/2021. Available from:  
16 [https://assets.publishing.service.gov.uk/government/uploads/system/uploads/attachment\\_data/file/  
17 888254/COVID19\\_Epidemiological\\_Summary\\_w22\\_Final.pdf](https://assets.publishing.service.gov.uk/government/uploads/system/uploads/attachment_data/file/888254/COVID19_Epidemiological_Summary_w22_Final.pdf)
- 18 83. Weekly Coronavirus Disease 2019 (COVID-19) Surveillance Report: Week 39. Public Health  
19 England; 2020. 01/01/2021. Available from:  
20 [https://assets.publishing.service.gov.uk/government/uploads/system/uploads/attachment\\_data/file/  
21 921561/Weekly\\_COVID19\\_Surveillance\\_Report\\_week\\_39\\_FINAL.pdf](https://assets.publishing.service.gov.uk/government/uploads/system/uploads/attachment_data/file/921561/Weekly_COVID19_Surveillance_Report_week_39_FINAL.pdf)
- 22 84. Weekly Coronavirus Disease 2019 (COVID-19) surveillance report: Week 38. Public Health  
23 England; 2020. 01/01/2021. Available from:  
24 [https://assets.publishing.service.gov.uk/government/uploads/system/uploads/attachment\\_data/file/  
25 919676/Weekly\\_COVID19\\_Surveillance\\_Report\\_week\\_38\\_FINAL\\_UPDATED.pdf](https://assets.publishing.service.gov.uk/government/uploads/system/uploads/attachment_data/file/919676/Weekly_COVID19_Surveillance_Report_week_38_FINAL_UPDATED.pdf)
- 26 85. Weekly Coronavirus Disease 2019 (COVID-19) surveillance report: Week 37. Public Health  
27 England; 2020. 01/01/2021. Available from:  
28 [https://assets.publishing.service.gov.uk/government/uploads/system/uploads/attachment\\_data/file/  
29 920372/Weekly\\_COVID19\\_Surveillance\\_Report\\_week\\_37\\_FINAL\\_UPDATED.pdf](https://assets.publishing.service.gov.uk/government/uploads/system/uploads/attachment_data/file/920372/Weekly_COVID19_Surveillance_Report_week_37_FINAL_UPDATED.pdf)
- 30 86. Weekly Coronavirus Disease 2019 (COVID-19) surveillance report: Week 36. Public Health  
31 England; 2020. 01/01/2021. Available from:  
32 [https://assets.publishing.service.gov.uk/government/uploads/system/uploads/attachment\\_data/file/  
33 920373/Weekly\\_COVID19\\_Surveillance\\_Report\\_week\\_36\\_UPDATED.pdf](https://assets.publishing.service.gov.uk/government/uploads/system/uploads/attachment_data/file/920373/Weekly_COVID19_Surveillance_Report_week_36_UPDATED.pdf)
- 34 87. Weekly Coronavirus Disease 2019 (COVID-19) surveillance report: Week 35. Public Health  
35 England; 2020. 01/01/2021. Available from:  
36 [https://assets.publishing.service.gov.uk/government/uploads/system/uploads/attachment\\_data/file/  
37 912973/Weekly\\_COVID19\\_Surveillance\\_Report\\_week\\_35\\_FINAL.PDF](https://assets.publishing.service.gov.uk/government/uploads/system/uploads/attachment_data/file/912973/Weekly_COVID19_Surveillance_Report_week_35_FINAL.PDF)
- 38 88. Thompson CP, Grayson NE, Paton RS, Bolton JS, Lourenço J, Penman BS, et al. Detection of  
39 neutralising antibodies to SARS-CoV-2 to determine population exposure in Scottish blood donors  
40 between March and May 2020. *Euro surveill.* 2020;25(42).
- 41 89. Fogel O, Mariaggi AA, Méritet JF, André E, Boisson M, Combier A, et al. Étude prospective de  
42 séroprévalence du Sars-Cov-2 chez 249 patients suivis pour un rhumatisme inflammatoire chronique.  
43 *Revue du Rhumatisme.* 2020;87:A292-A3.
- 44 90. Choi M, Bachmann F, Naik MG, Duettmann W, Duerr M, Zukunft B, et al. Low Seroprevalence  
45 of SARS-CoV-2 Antibodies during Systematic Antibody Screening and Serum Responses in Patients  
46 after COVID-19 in a German Transplant Center. *J Clin Med.* 2020;9(11).
- 47 91. Rauber Conrad, Tiwari-Heckler Shilpa, Jan P, Arianeb M, Frederike L, Philip G, et al. SARS-CoV-  
48 2 seroprevalence and clinical features of COVID-19 in a German liver transplant recipient cohort: a  
49 prospective serosurvey study. *Transplantation Proceedings.* 2020.
- 50  
51  
52  
53  
54  
55  
56  
57  
58  
59  
60

- 1  
2  
3 92. Zambelli A, Fotia V, Bosetti T, Negrini G, di Croce A, Moro C, et al. Prevalence and clinical  
4 impact of asymptomatic or mildly symptomatic SARSCoV-2 infection among actively treated cancer  
5 patients during COVID-19 pandemic in Italy. *Annals of Oncology*. 2020;31:S994.
- 6 93. Medas F, Cappellacci F, Anedda G, Canu GL, Del Giacco S, Calò PG, et al. Seroprevalence of  
7 SARS-Cov-2 in the setting of a non-dedicated COVID-19 hospital in a low CoV-2 incidence area:  
8 Implications for surgery. *Annals of Medicine and Surgery*. 2020.
- 9 94. Capasso N, Palladino R, Montella E, Pennino F, Lanzillo R, Carotenuto A, et al. Prevalence of  
10 SARS-CoV-2 Antibodies in Multiple Sclerosis: The Hidden Part of the Iceberg. 2020;9(12).
- 11 95. Cento V, Alteri C, Merli M, Di Ruscio F, Tartaglione L, Rossotti R, et al. Effectiveness of  
12 infection-containment measures on SARS-CoV-2 seroprevalence and circulation from May to July  
13 2020, in Milan, Italy. *PLoS One*. 2020;15(11):e0242765-e.
- 14 96. Berte R, Mazza S, Stefanucci MR, Noviello D, Costa S, Ciafardini C, et al. Seroprevalence of  
15 SARS-CoV2 in IBD Patients Treated with Biologic Therapy. *J Crohns Colitis*. 2021;15(5):864-8.
- 16 97. Vena A, Berruti M, Adessi A, Blumetti P, Brignole M, Colognato R, et al. Prevalence of  
17 antibodies to SARS-CoV-2 in Italian adults and associated risk factors. *J Clin Med*. 2020;9(9):1-9.
- 18 98. Cabezón-Gutiérrez L, Custodio-Cabello S, Palka-Kotłowska M, Oliveros-Acebes E, García-  
19 Navarro MJ, Khosravi-Shahi P. Seroprevalence of SARS-CoV-2-specific antibodies in cancer  
20 outpatients in Madrid (Spain): A single center, prospective, cohort study and a review of available  
21 data. *Cancer Treat Rev*. 2020;90:102102-.
- 22 99. Prados N, González-Ravina C, Vergara V, Herrero J, Cruz M, Requena A. RISK FACTOR  
23 ANALYSIS FOR SARS-COV-2 SEROPOSITIVITY WITHIN ASSISTED REPRODUCTIVE. *Fertility and Sterility*.  
24 2020;114(3):e542-e.
- 25 100. Clarke C, Predecki M, Dhutia A, Ali MA, Sajjad H, Shivakumar O, et al. High Prevalence of  
26 Asymptomatic COVID-19 Infection in Hemodialysis Patients Detected Using Serologic Screening. *J Am  
27 Soc Nephrol*. 2020;31(9):1969-75.
- 28 101. Predecki M, Clarke C, Gleeson S, Greathead L, Santos E, McLean A, et al. Detection of SARS-  
29 CoV-2 Antibodies in Kidney Transplant Recipients. *J Am Soc Nephrol*. 2020;31(12):2753-6.
- 30 102. Egerup P, Fich Olsen L, Christiansen A-MH, Westergaard D, Severinsen ER, Hviid KVR, et al.  
31 Severe Acute Respiratory Syndrome Coronavirus 2 (SARS-CoV-2) Antibodies at Delivery in Women,  
32 Partners, and Newborns. *Obstetrics & Gynecology*. 2021;137(1):49-55.
- 33 103. Mattern J, Vauloup-Fellous C, Zakaria H, Benachi A, Carrara J, Letourneau A, et al. Post  
34 lockdown COVID-19 seroprevalence and circulation at the time of delivery, France. *PLoS One*.  
35 2020;15(10):e0240782-e.
- 36 104. Tsatsaris V, Mariaggi A-A, Launay O, Couffignal C, Rousseau J, Ancel PY, et al. SARS-COV-2 IgG  
37 antibody response in pregnant women at delivery. *J Gynecol Obstet Hum Reprod*.  
38 2020;50(7):102041-.
- 39 105. Cosma S, Borella F, Carosso A, Sciarrone A, Cusato J, Corcione S, et al. The “scar” of a  
40 pandemic: Cumulative incidence of COVID-19 during the first trimester of pregnancy. *Journal of  
41 Medical Virology*. 2020;93(1):537-40.
- 42 106. Crovetto F, Crispi F, Llurba E, Figueras F, Gómez-Roig MD, Gratacós E. SEROPREVALENCE AND  
43 CLINICAL SPECTRUM OF SARS-CoV-2 INFECTION IN THE FIRST VERSUS THIRD TRIMESTER OF  
44 PREGNANCY. *medRxiv*. 2020:2020.06.17.20134098.
- 45 107. Villalaín C, Herraiz I, Luczkowiak J, Pérez-Rivilla A, Folgueira MD, Mejía I, et al. Seroprevalence  
46 analysis of SARS-CoV-2 in pregnant women along the first pandemic outbreak and perinatal outcome.  
47 *PLoS One*. 2020;15(11):e0243029-e.
- 48 108. Lumley SF, Eyre DW, McNaughton AL, Howarth A, Hoosdally S, Hatch SB, et al. SARS-CoV-2  
49 antibody prevalence, titres and neutralising activity in an antenatal cohort, United Kingdom, 14 April  
50 to 15 June 2020. *Euro surveill*. 2020;25(42).
- 51  
52  
53  
54  
55  
56  
57  
58  
59  
60

- 1  
2  
3 109. Krátká Z Fau - Fürst T, Fürst T Fau - Vencálek O, Vencálek O Fau - Kůrková V, Kůrková V Fau -  
4 Šimečková E, Šimečková E Fau - Fleischmannová J, Fleischmannová J Fau - Strojil J, et al. Exploratory  
5 drilling: how to set up, carry out, and evaluate a seroprevalence study. (0008-7335 (Print)).  
6  
7 110. Jerković I, Ljubić T, Bašić Ž, Kružić I, Kunac N, Bezić J, et al. SARS-CoV-2 Antibody  
8 Seroprevalence in Industry Workers in Split-Dalmatia and Šibenik-Knin County, Croatia. *J Occup*  
9 *Environ Med.* 2021;63(1):32-7.  
10 111. Vince A, Zadro R, Sostar Z, Sternak SL, Vranes J, Skaro V, et al. SARS-CoV-2 Seroprevalence in  
11 a Cohort of Asymptomatic, RT-PCR Negative Croatian First League Football Players. 2020.  
12 112. Anna F, Goyard S, Lalanne AI, Nevo F, Gransagne M, Souque P, et al. High seroprevalence but  
13 short-lived immune response to SARS-CoV-2 infection in Paris. *European Journal of Immunology.*  
14 2021;51(1):180-90.  
15 113. Fontanet A, Tondeur L, Grant R, Temmam S, Madec Y, Bigot T, et al. SARS-CoV-2 infection in  
16 schools in a northern French city: a retrospective serological cohort study in an area of high  
17 transmission, France, January to April 2020. *Eurosurveillance.* 2021;26(15):2001695.  
18 114. Roederer T, Mollo B, Vincent C, Nikolay B, Llosa AE, Nesbitt R, et al. Seroprevalence and risk  
19 factors of exposure to COVID-19 in homeless people in Paris, France: a cross-sectional study. *The*  
20 *Lancet Public Health.* 2021;6(4):e202-e9.  
21 115. Krähling V, Kern M, Halwe S, Müller H, Rohde C, Savini M, et al. Epidemiological study to  
22 detect active SARS-CoV-2 infections and seropositive persons in a selected cohort of employees in the  
23 Frankfurt am Main metropolitan area. *medRxiv.* 2020:2020.05.20.20107730-2020.05.20.  
24 116. Mack D, Gartner BC, Rossler A, Kimpel J, Donde K, Harzer O, et al. Prevalence of SARS-CoV-2  
25 IgG antibodies in a large prospective cohort study of elite football players in Germany (May-June  
26 2020): implications for a testing protocol in asymptomatic individuals and estimation of the rate of  
27 undetected cases. *Clin Microbiol Infect.* 2021;27(3):473 e1- e4.  
28 117. [dataset] Ceban A. National Agency for Public Health RoM. Serological surveillance of COVID-  
29 19 in the general population with age stratification in the Republic of Moldova. 2020. WHO Unity  
30 Studies Global SARS-CoV-2 Seroepidemiological Investigations. Data repository for unpublished  
31 datasets for the WHO Unity Initiative. November 4, 2021 [https://zenodo.org/communities/unity-](https://zenodo.org/communities/unity-sero-2021?page=1&size=20)  
32 [sero-2021?page=1&size=20.](https://zenodo.org/communities/unity-sero-2021?page=1&size=20)  
33 118. Gujski M, Jankowski M, Pinkas J, Wierzba W, Samel-Kowalik P, Zaczynski A, et al. Prevalence  
34 of Current and Past SARS-CoV-2 Infections among Police Employees in Poland, June-July 2020. *Journal*  
35 *of Clinical Medicine.* 2020;9(10):11-.  
36 119. Pérez-García F, Pérez-Zapata A, Arcos N, De la Mata M, Ortiz M, Simón E, et al. Severe acute  
37 respiratory coronavirus virus 2 (SARS-CoV-2) infection among hospital workers in a severely affected  
38 institution in Madrid, Spain: A surveillance cross-sectional study. *Infection Control & Hospital*  
39 *Epidemiology.* 2021;42(7):803-9.  
40 120. Ulyte A, Radtke T, Abela IA, Haile SR, Berger C, Huber M, et al. Clustering and longitudinal  
41 change in SARS-CoV-2 seroprevalence in school children in the canton of Zurich, Switzerland:  
42 prospective cohort study of 55 schools. *BMJ.* 2021;372:n616.  
43 121. Roarty C, Tonry C, McFetridge L, Mitchell H, Watson C, Waterfield T. Kinetics and  
44 seroprevalence of SARS-CoV-2 antibodies in children. *Lancet, Infect dis (Online).* 2020.  
45 122. Waterfield T, Watson C, Moore R, Ferris K, Tonry C, Watt A, et al. Seroprevalence of SARS-  
46 CoV-2 antibodies in children: a prospective multicentre cohort study. *Arch Dis Child.* 2021;106(7):680-  
47 6.  
48 123. Armann JP, Unrath M, Kirsten C, Lueck C, Dalpke A, Berner R. Anti-SARS-CoV-2 IgG antibodies  
49 in adolescent students and their teachers in Saxony, Germany (SchoolCoviDD19): very low  
50 seroprevalence and transmission rates.  
51 124. Reisinger EC, von Possel R, Warnke P, Geerdes-Fenge HF, Hemmer CJ, Pfefferle S, et al.  
52 Mütter-Screening in einem COVID-19-Niedrig-Pandemiegebiet: Bestimmung SARS-CoV-2-spezifischer  
53  
54  
55  
56  
57  
58  
59



- 1  
2  
3 Antikörper bei 401 Rostocker Müttern mittels ELISA und Immunfluoreszenz-Bestätigungstest. *Dtsch*  
4 *Med Wochenschr.* 2020;145(17):e96-e100.
- 5 125. Tsitsilonis OE, Paraskevis D, Lianidou E, Pierros V, Akalestos A, Kastritis E, et al.  
6 Seroprevalence of Antibodies against SARS-CoV-2 among the Personnel and Students of the National  
7 and Kapodistrian University of Athens, Greece: A Preliminary Report. *Life-Basel.* 2020;10(9).
- 8 126. Lastrucci Lorini, Chiara Del Riccio, Marco Gori, Eleonora Chiesi, Fabrizio Sartor, Gino Zanella,  
9 et al. SARS-CoV-2 Seroprevalence Survey in People Involved in Different Essential Activities during the  
10 General Lock-Down Phase in the Province of Prato (Tuscany, Italy). *Vaccines.* 2020;8(4):778-  
11
- 12 127. Soriano V, Meiriño R, Corral O, Guallar MP. Severe Acute Respiratory Syndrome Coronavirus  
13 2 Antibodies in Adults in Madrid, Spain. *Clin Infect Dis.* 2021;72(6):1101-2.
- 14 128. Montenegro P, Brotons C, Serrano J, FernÁndez D, Garcia-Ramos C, Ichazo Ba, et al.  
15 Community seroprevalence of COVID-19 in probable and possible cases at primary health care  
16 centres in Spain. 2020.
- 17 129. Emmenegger M, De Cecco E, Lamparter D, Jacquat RIPB, Ebner D, Schneider MM, et al. Early  
18 peak and rapid decline of SARS-CoV-2 seroprevalence in a Swiss metropolitan region. *medRxiv.*  
19 2020:2020.05.31.20118554-2020.05.31.
- 20 130. Castro Dopico X, Muschiol S, Christian M, Hanke L, Sheward DJ, Grinberg NF, et al.  
21 Seropositivity in blood donors and pregnant women during the first year of SARS-CoV-2 transmission  
22 in Stockholm, Sweden. *Journal of Internal Medicine.* 2021;290(3):666-76.
- 23 131. Davis KAS, Carr E, Leightley D, Vitiello V, Bergin-Cartwright G, Lavelle G, et al. Indicators of  
24 past COVID-19 infection status: Findings from a large occupational cohort of staff and postgraduate  
25 research students from a UK university. *medRxiv.* 2021:2020.12.07.20245183.
- 26 132. Jogi P, Soeorg H, Ingerainen D, Soots M, Lattekivi F, Naaber P, et al. Seroprevalence of SARS-  
27 CoV-2 IgG antibodies in two regions of Estonia (KoroSero-EST-1). 2020.
- 28 133. Bobrovitz N, Arora RK, Cao C, Boucher E, Liu M, Donnici C, et al. Global seroprevalence of  
29 SARS-CoV-2 antibodies: A systematic review and meta-analysis. *PLOS ONE.* 2021;16(6):e0252617.
- 30 134. Rostami A, Sepidarkish M, Leeflang MMG, Riahi SM, Nourollahpour Shiadeh M, Esfandyari S,  
31 et al. SARS-CoV-2 seroprevalence worldwide: a systematic review and meta-analysis. *Clinical*  
32 *Microbiology and Infection.* 2021;27(3):331-40.
- 33 135. Chen X, Chen Z, Azman AS, Deng X, Sun R, Zhao Z, et al. Serological evidence of human  
34 infection with SARS-CoV-2: a systematic review and meta-analysis. *The Lancet Global Health.*  
35 2021;9(5):e598-e609.
- 36 136. Bergeri I, Whelan MG, Ware H, Subissi L, Nardone A, Lewis HC, et al. Global SARS-CoV-2  
37 seroprevalence from January 2020 to April 2022: A systematic review and meta-analysis of  
38 standardized population-based studies. *PLOS Medicine.* 2022;19(11):e1004107.
- 39 137. Bobrovitz N, Arora RK, Cao C, Boucher E, Liu M, Rahim H, et al. Global seroprevalence of  
40 SARS-CoV-2 antibodies: a systematic review and meta-analysis. *medRxiv.* 2020:2020.11.17.20233460.
- 41 138. Vaselli NM, Hungerford D, Shenton B, Khashkhusa A, Cunliffe NA, French N. The  
42 Seroprevalence of SARS-CoV-2 in Europe: A Systematic Review. *bioRxiv.* 2021:2021.04.12.439425.
- 43 139. Goldman M, Steele WR, Di Angelantonio E, van den Hurk K, Vassallo RR, Germain M, et al.  
44 Comparison of donor and general population demographics over time: a BEST Collaborative group  
45 study. (1537-2995 (Electronic)).
- 46 140. Deeks JJ, Dinnes J, Takwoingi Y, Davenport C, Spijker R, Taylor-Phillips S, et al. Antibody tests  
47 for identification of current and past infection with SARS-CoV-2. *Cochrane Database of Systematic*  
48 *Reviews.* 2020(6).
- 49 141. Lisboa Bastos M, Tavaziva G, Abidi SK, Campbell JR, Haraoui L-P, Johnston JC, et al. Diagnostic  
50 accuracy of serological tests for covid-19: systematic review and meta-analysis. *BMJ.*  
51 2020;370:m2516.
- 52  
53  
54  
55  
56  
57  
58  
59  
60

- 1  
2  
3 142. World Health Organization; 2020. Establishment of the WHO International Standard and  
4 Reference Panel for anti-SARS-CoV-2 antibody. Available from:  
5 <https://www.who.int/publications/m/item/WHO-BS-2020.2403>.  
6  
7 143. Kristiansen PA, Page M, Bernasconi V, Mattiuzzo G, Dull P, Makar K, et al. WHO International  
8 Standard for anti-SARS-CoV-2 immunoglobulin. *The Lancet*. 2021;397(10282):1347-8.  
9  
10 144. The JRC releases new reference materials for the quality control of SARS-CoV-2 antibody  
11 tests. European Centre for Disease Prevention and Control; 2021. Available from:  
12 <https://ec.europa.eu/jrc/en/news/new-reference-materials-quality-control-covid-19-antibody-tests>  
13  
14 145. Seow J, Graham C, Merrick B, Acors S, Pickering S, Steel KJA, et al. Longitudinal observation  
15 and decline of neutralizing antibody responses in the three months following SARS-CoV-2 infection in  
16 humans. *Nature Microbiology*. 2020;5(12):1598-607.  
17  
18 146. Chia WN, Zhu F, Ong SWX, Young BE, Fong S-W, Le Bert N, et al. Dynamics of SARS-CoV-2  
19 neutralising antibody responses and duration of immunity: a longitudinal study. *The Lancet Microbe*.  
20 2021;2(6):e240-e9.  
21  
22 147. Clapham H Fau - Hay J, Hay J Fau - Routledge I, Routledge I Fau - Takahashi S, Takahashi S Fau  
23 - Choisy M, Choisy M Fau - Cummings D, Cummings D Fau - Grenfell B, et al. Seroepidemiologic Study  
24 Designs for Determining SARS-COV-2 Transmission and Immunity. (1080-6059 (Electronic)).  
25  
26  
27  
28  
29  
30  
31  
32  
33  
34  
35  
36  
37  
38  
39  
40  
41  
42  
43  
44  
45  
46  
47  
48  
49  
50  
51  
52  
53  
54  
55  
56  
57  
58  
59  
60

Figure 1: PRISMA Flow chart of SARS-CoV-2 seroprevalence study selection

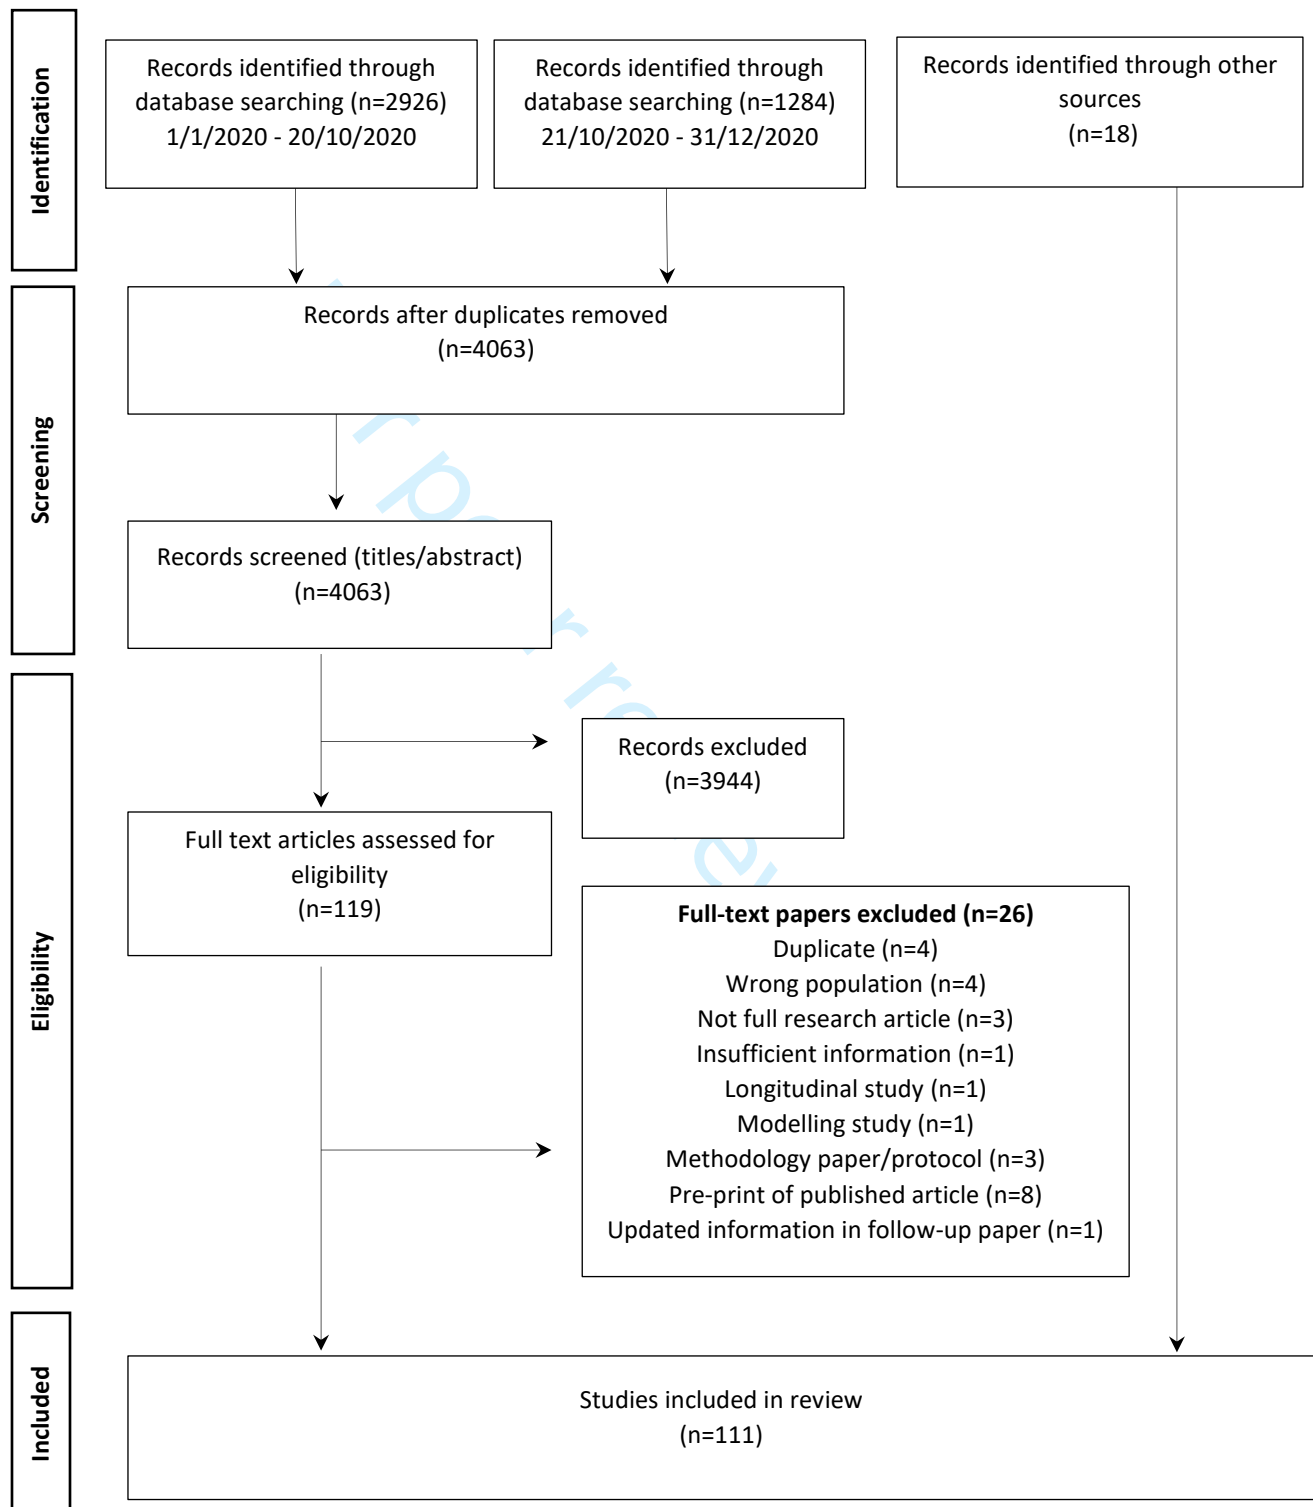

**Figure 2: Geographical distribution of SARS-CoV-2 seroprevalence studies published in the WHO European Region between 1 Jan – 31 Dec 2020**

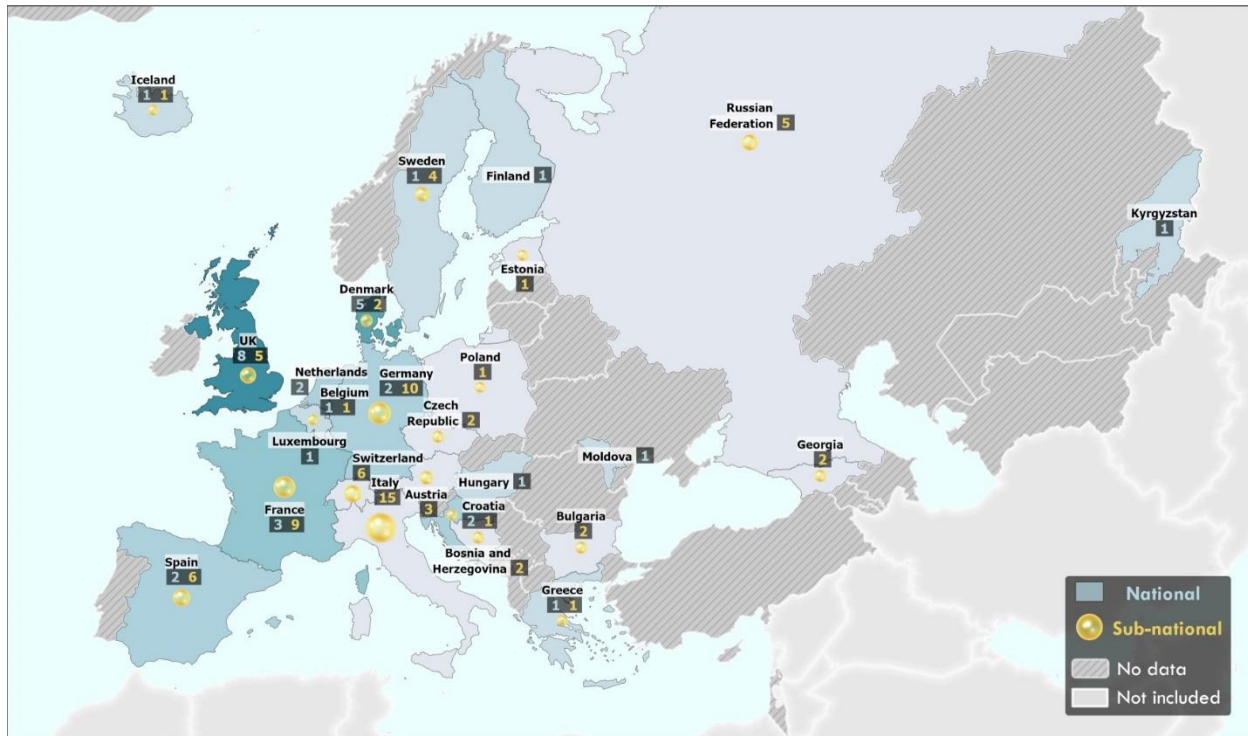

Countries with national-level seroprevalence studies are reported in blue (shade of blue reflects the number of studies conducted in the country/territory). Subnational-level seroprevalence studies are reported as a yellow circle (Size of circle reflects number of subnational studies conducted in the country/territory). Number of studies are listed in boxes under name. Countries with not studies are coloured in grey. The designations employed and the presentation of this material do not imply the expression of any opinion whatsoever on the part of the Secretariat of the World Health Organization concerning the legal status of any country, territory, city or area or of its authorities, or concerning the delimitation of its frontiers and boundaries. Dotted and dashed lines on maps represent approximate locations for which there may not yet be full agreement.



1  
2  
3  
4  
5  
6  
7  
8  
9  
10  
11  
12  
13  
14  
15  
16  
17  
18  
19  
20  
21  
22  
23  
24  
25  
26  
27  
28  
29  
30  
31  
32  
33  
34  
35  
36  
37  
38  
39  
40  
41  
42  
43  
44  
45  
46  
47  
48  
49  
50  
51  
52  
53  
54  
55  
56  
57  
58  
59  
60

For peer review only

1  
2  
3  
4  
5  
6  
7  
8  
9  
10  
11  
12  
13  
14  
15  
16  
17  
18  
19  
20  
21  
22  
23  
24  
25  
26  
27  
28  
29  
30  
31  
32  
33  
34  
35  
36  
37  
38  
39  
40  
41  
42  
43  
44  
45  
46

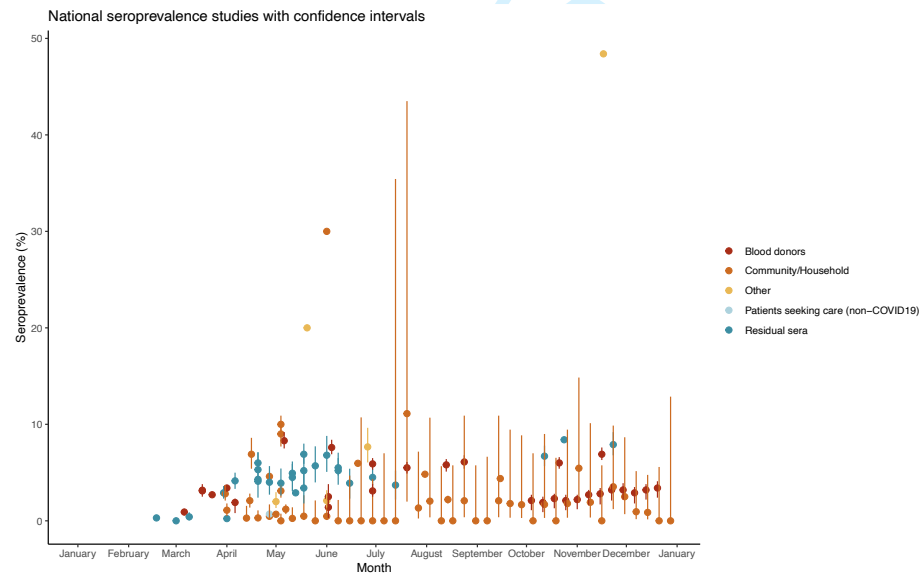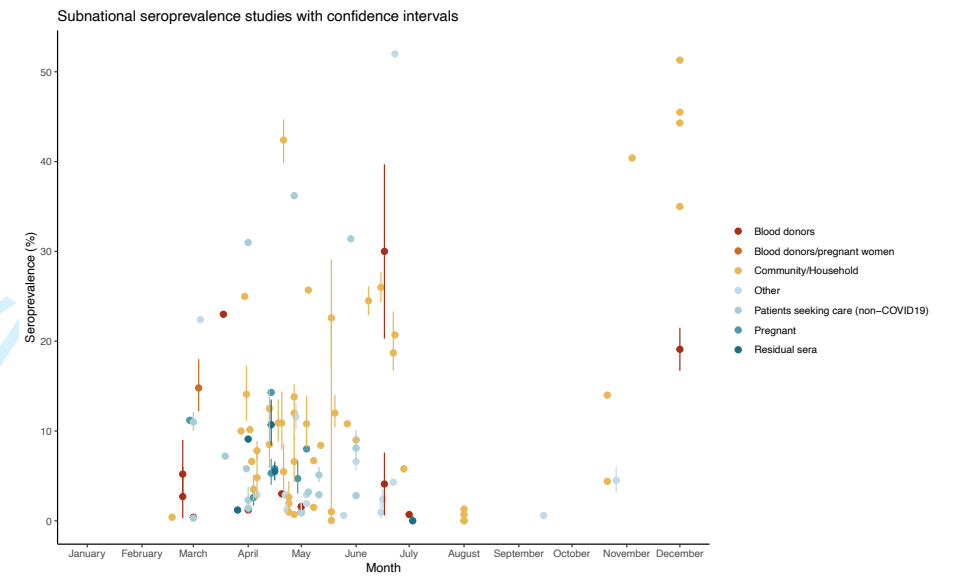

1  
2  
3  
4  
5  
6  
7  
8  
9  
10  
11  
12  
13  
14  
15  
16  
17  
18  
19  
20  
21  
22  
23  
24  
25  
26  
27  
28  
29  
30  
31  
32  
33  
34  
35  
36  
37  
38  
39  
40  
41  
42  
43  
44  
45  
46

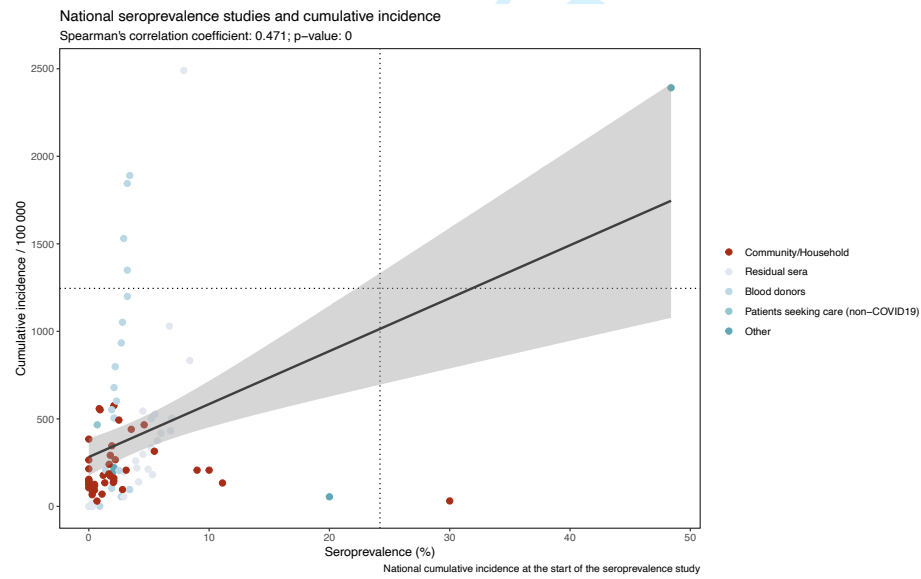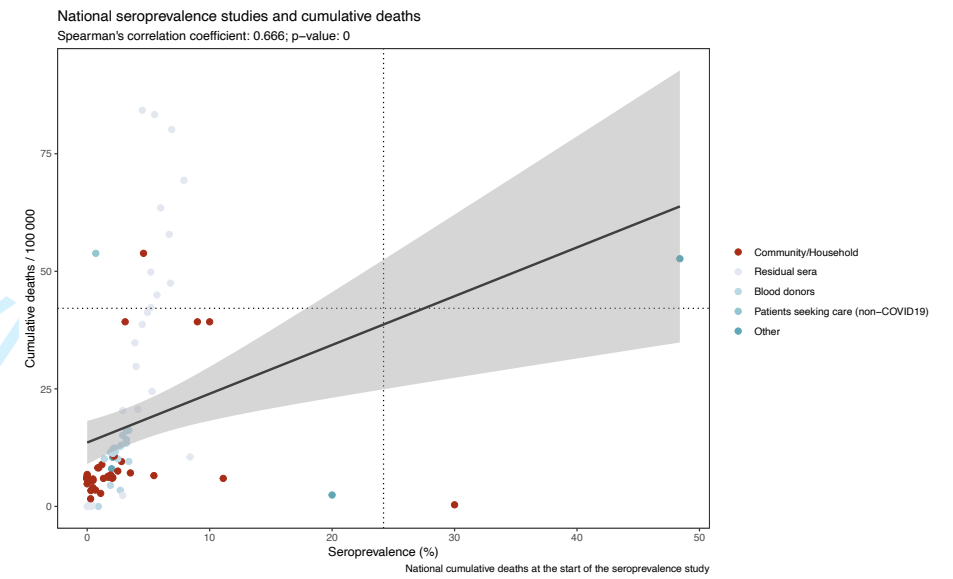

## Supplementary Material

### S1 Supplementary Methods

#### S1.1 Search strategy and selection criteria

We searched the WHO “COVID-19 Global literature on coronavirus disease” database (MEDLINE, EMBASE and the pre-print servers medRxiv and bioRxiv) (100) using search terms that included a range of criteria relating to seroprevalence surveys. The search terms and inclusion and exclusion criteria are described below (Table S1).

#### S1.2 Search terms

ti:sero\$urv\* or ti:serosurv\* or ti:seroepidemiolog\* or ti:sero\$epidemiolog\* or ti:serolog\* or ti:seropositiv\* or ti:seropositiv\* or ti:serosurveillance or ti:sero\$surveillance or ti:seroprevalence or ti:sero\$prevalence or ti:antibody or ti:antibodies or ti:immunity or ti:immunoglobulin OR ab:sero\$urv\* or ab:serosurv\* or ab:seroepidemiolog\* or ab:sero\$epidemiolog\* or ab:serolog\* or ab:seropositiv\* or ab:sero\$positiv\* or ab:serosurveillance or ab:sero\$surveillance or ab:seroprevalence or ab:sero\$prevalence

**Table S1 Inclusion and exclusion criteria**

| <b>Characteristics</b>       | <b>Inclusion criteria</b>                                                   | <b>Exclusion criteria</b>                                                                                                                                                |
|------------------------------|-----------------------------------------------------------------------------|--------------------------------------------------------------------------------------------------------------------------------------------------------------------------|
| <b>Type of evidence</b>      | Published or unpublished scientific literature                              | Media reports (e.g. news items and press releases), reviews, assessed performance of a test, protocols                                                                   |
|                              | Completed or ongoing serosurveys                                            | Unrelated to seroprevalence                                                                                                                                              |
|                              | Report seroprevalence estimates from one or multiple time points            |                                                                                                                                                                          |
|                              | Cross-sectional and cohort study designs                                    | Case-control studies, case reports or reviews                                                                                                                            |
| <b>Population</b>            | Studies of human participants, any age                                      | Studies of non-human participants (i.e. animal studies)                                                                                                                  |
|                              | Population groups considered to be representative of the general population | Population groups considered to be unrepresentative of the general population as they had higher risk of infection (e.g. healthcare workers and other high-risk groups). |
|                              |                                                                             | Studies only of individuals with suspected (e.g. respiratory symptoms) or confirmed SARS-CoV-2 (RT-PCR laboratory confirmation)                                          |
| <b>Geographical location</b> | WHO European region                                                         | Outside of WHO European Region                                                                                                                                           |
| <b>Languages</b>             | Any language                                                                | N/A                                                                                                                                                                      |

**Table S2: Description of the quality assessment criteria used**

| <b>Risk of bias criteria</b>                                                                                  | <b>Risk of bias assessment</b>                                                                                     | <b>Risk of bias scoring</b> |
|---------------------------------------------------------------------------------------------------------------|--------------------------------------------------------------------------------------------------------------------|-----------------------------|
| <b>Sampling frame: Representative of general population?</b>                                                  | Poor (e.g hospital admissions, GP visits, pregnant women, employees)                                               | 0                           |
|                                                                                                               | Weak (eg. blood donors)                                                                                            | 1                           |
|                                                                                                               | Good (e.g household sampling)                                                                                      | 2                           |
| <b>Sampling frame: Age profile included?</b>                                                                  | Does not cover those in target population (e.g study of 'all ages' excludes elderly or children)                   | 0                           |
|                                                                                                               | Study includes all those in target population                                                                      | 1                           |
|                                                                                                               | Includes all ages (including children)                                                                             | 2                           |
| <b>Sampling method: Were study participants sampled appropriate?</b>                                          | Non-random/non-exhaustive (including convenience sampling)                                                         | 0                           |
|                                                                                                               | Exhaustive                                                                                                         | 1                           |
|                                                                                                               | Random                                                                                                             | 2                           |
| <b>Sample size: Is sample size calculation described in methods?</b>                                          | Unclear                                                                                                            | 0                           |
|                                                                                                               | Yes                                                                                                                | 1                           |
| <b>Sample size: Was the sample size adequate?</b>                                                             | If at least 300 samples in the study then adequate OR if at least 100 samples per age group (if stratified by age) | 1                           |
|                                                                                                               | If NONE of above OR no mention in methods/unclear                                                                  | 0                           |
|                                                                                                               |                                                                                                                    |                             |
| <b>Test method: Use of more than one assays/test?</b>                                                         | Yes                                                                                                                | 1                           |
|                                                                                                               | No                                                                                                                 | 0                           |
| <b>Test method 1: Are tests sufficiently accurate? (no clinical validation)</b>                               | Sensitivity/specificity acceptable* (i.e ELISA: Sn $\geq$ 95%, Sp $>$ 97% OR POCT: Sn $\geq$ 90%, Sp $>$ 97%)      | 1                           |
|                                                                                                               | Sensitivity/specificity not acceptable (i.e ELISA: Sn $<$ 95%, Sp $<$ 97% OR POCT: Sn $<$ 90%, Sp $<$ 97%)         | 0                           |
| <b>Test method 2: Use of commercial tests with clinical validation?</b>                                       | Sensitivity/specificity acceptable* (i.e ELISA: Sn $\geq$ 95%, Sp $>$ 97% OR POCT: Sn $\geq$ 90%, Sp $>$ 97%)      | 2                           |
|                                                                                                               | Sensitivity/specificity not acceptable (i.e ELISA: Sn $<$ 95%, Sp $<$ 97% OR POCT: Sn $<$ 90%, Sp $<$ 97%)         | 1                           |
| <b>Test method 3: Use of in-house assay</b>                                                                   | Sensitivity/specificity acceptable* (i.e ELISA: Sn $\geq$ 95%, Sp $>$ 97% OR POCT: Sn $\geq$ 90%, Sp $>$ 97%)      | 2                           |
|                                                                                                               | Sensitivity/specificity not acceptable (i.e ELISA: Sn $<$ 95%, Sp $<$ 97% OR POCT: Sn $<$ 90%, Sp $<$ 97%)         | 1                           |
|                                                                                                               | No results reported                                                                                                | 0                           |
| <b>Data analysis: Were the results adjusted according to sensitivity/specificity of the serological test?</b> | Yes and Confidence intervals presented                                                                             | 2                           |
|                                                                                                               | Yes but no Confidence intervals presented                                                                          | 1                           |
|                                                                                                               | No/Unclear                                                                                                         | 0                           |
| <b>Overall risk of bias</b>                                                                                   | <b>High risk of bias</b>                                                                                           | <b>1-3</b>                  |
|                                                                                                               | <b>Moderate risk of bias</b>                                                                                       | <b>4-6</b>                  |
|                                                                                                               | <b>Low-risk bias</b>                                                                                               | <b><math>&gt;</math>6</b>   |

1  
2  
3 **S2 Supplementary Tables and Figures**  
4  
5

6 **Supplementary Table S1 Inclusion and exclusion criteria**  
7

8 **Supplementary Table S2: Description of the quality assessment criteria used**  
9

10 **Supplementary Table S3: Characteristics of eligible seroprevalence studies**  
11

12  
13 See PDF file attached separately  
14

15 **Supplementary figure S1 Forest plot of the seroprevalence of SARS-CoV-2 antibodies in**  
16 **Community/Household samples with corresponding 95% confidence intervals in WHO**  
17 **European Region (1/1/2020-31/12/2020)**  
18

19  
20 See PDF file attached separately  
21

22 **Supplementary figure S2: Forest plot of the seroprevalence of SARS-CoV-2 antibodies in (Top**  
23 **to bottom, Left to Right) a) Residual sera b) Blood donors c) Pregnant or Parturient women d)**  
24 **Patients seeking care (non-COVID) and e) Other populations**  
25

26  
27 See PDF file attached separately  
28

29 **Supplementary figure S3 Time point of conducted sero-epidemiology studies in relation to**  
30 **country epidemic activity**  
31

32  
33 See PDF file attached separately  
34  
35  
36  
37  
38  
39  
40  
41  
42  
43  
44  
45  
46  
47  
48  
49  
50  
51  
52  
53  
54  
55  
56  
57  
58  
59  
60

| Author                                       | Country                           | Study Location         | Region                                        | WHO UNITY  | Geographic location | Publication | Study period      | Study population                 | Sample method | Sampling frame | No.             | Sero-positivity (%)          | Method                                                           | Assay                  | Antibody                                                                                          | Sn (%)                                        | Sp (%)                                      | Score                                       | Risk of bias |        |
|----------------------------------------------|-----------------------------------|------------------------|-----------------------------------------------|------------|---------------------|-------------|-------------------|----------------------------------|---------------|----------------|-----------------|------------------------------|------------------------------------------------------------------|------------------------|---------------------------------------------------------------------------------------------------|-----------------------------------------------|---------------------------------------------|---------------------------------------------|--------------|--------|
| <b>Household and community</b>               |                                   |                        |                                               |            |                     |             |                   |                                  |               |                |                 |                              |                                                                  |                        |                                                                                                   |                                               |                                             |                                             |              |        |
| 1<br>2<br>3                                  | Knabl (16)                        | Austria                | Tyrol, Ischgl                                 | EU/EEA     | Yes                 | City/local  | Published^        | 21-27 Apr                        | GP            | Random         | HH/C            | 1473                         | 42.4% (39.8 - 44.7%)                                             | ELISA; CLIA            | EUROIMMUN; Abbott laboratories;                                                                   | Anti-S; IgA;IgG; anti-N IgG                   | NR                                          | NR                                          | 8            | Low    |
| 4<br>5<br>6<br>7<br>8                        | Wagner (17)                       | Austria                | Vienna                                        | EU/EEA     | No                  | City/local  | Pre-print         | 12-17 Apr                        | GP            | Convenience    | HH/C            | 1655                         | 10.15%                                                           | ELISA; ELISA; CLIA; MN | EUROIMMUN; Beijing Wantai Biological Pharmacy Enterprise; EUROIMMUN; Roche Diagnostics; In-house; | IgA;IgG; IgM, total Abs;IgG; Total Abs;NT-Abs | NR                                          | NR                                          | 3            | High   |
| 9<br>10                                      | Ladage (18)                       | Austria                | Weißkirchen/Wachau                            | EU/EEA     | No                  | City/local  | Published         | 1-15 Jun                         | GP            | Convenience    | HH/C            | 835                          | ELISA: IgG 8.5%; IgA 9.0%;                                       | ELISA;                 | EUROIMMUN                                                                                         | IgA;IgG                                       | NR                                          | NR                                          | 5            | Medium |
| 11<br>12<br>13                               | Boey (19)                         | Belgium                | Pelt; Alken                                   | EU/EEA     | No                  | Regional    | Published^        | 21 Sept - 6 Oct                  | GP            | Random         | HH/C            | 362                          | 4.4% (low exposed - Pelt); 14.4% (high exposed - Alken)          | ELISA;                 | Beijing Wantai Biological Pharmacy Enterprise; EUROIMMUN                                          | Total Abs;                                    | 99.6%                                       | NR                                          | 4            | Medium |
| 14<br>15                                     | Bokonjic (20)                     | Bosnia and Herzegovina | Republika Srbska                              | non-EU/EEA | Yes                 | Regional    | Unpublished       | 4 Nov - 16 Dec                   | GP            | Random         | HH/C            | 1855                         | 40.4%                                                            | ELISA                  | Beijing Wantai Biological Pharmacy Enterprise;                                                    | Total Abs;                                    | 94%                                         | 100%                                        | N/A          | N/A    |
| 16<br>17                                     | Kunchev and Stoitsova             | Bulgaria               | Plovdiv                                       | EU/EEA     | Yes                 | City/local  | Direct submission | 18-May-13 Jun                    | GP            | Random         | HH/C            | 553                          | 1.08% (0.5-2.35); 0.04% (0-0.12) <sup>§</sup>                    | ELISA;                 | EUROIMMUN                                                                                         | IgG; IgA                                      | NR                                          | NR                                          | N/A          | N/A    |
| 18<br>19<br>20                               | Statens Serum Institute (21)      | Denmark                | Copenhagen; Aarhus; Aalborg; Næstved; Odense  | EU/EEA     | Yes                 | National    | Report            | Apr                              | GP            | Random         | HH/C            | 1071                         | 1.1% (0.5-1.8)                                                   | ELISA                  | NR                                                                                                | NR                                            | NR                                          | NR                                          | 6            | Medium |
| 21<br>22<br>23                               | Statens Serum Institute (22) (23) | Denmark                | Copenhagen; Aarhus; Aalborg; Næstved; Odense  | EU/EEA     | Yes                 | National    | Report            | 7 May - 9 Jun; 14 Aug - 1 Oct    | GP            | Random         | HH/C            | 2444; 18000                  | 1,2 (0,7-1,7);2,2 (1,8 -2,6)                                     | ELISA                  | Beijing Wantai Biological Pharmacy Enterprise;                                                    | NR                                            | NR                                          | NR                                          | 9            | Low    |
| 24<br>25                                     | Petersen (24)                     | Denmark                | Faroe Islands                                 | EU/EEA     | Yes                 | Regional    | Published         | 27 Apr - 1 May                   | GP            | Random         | HH/C            | 1500                         | 0.7% <sup>§</sup>                                                | ELISA                  | Beijing Wantai Biological Pharmacy Enterprise                                                     | IgM; IgG                                      | 94%                                         | 100%                                        | 9            | Low    |
| 26<br>27<br>28<br>29                         | Jõgi (25)                         | Estonia                | Tallinn; Saaremaa                             | EU/EEA     | No                  | Regional    | Pre-print         | 8 May - 31 Jul                   | GP            | Random         | HH/C            | Total 1960; 1006; 954;       | Tallinn: 1.5% § ; Saaremaa: 6.7% §                               | CMIA; CLIA; LIPS; LFA; | Abbott Laboratories; DiaSorin Liaison; In-house; Biosensor                                        | IgG; IgG; NA; IgM/IgG                         | 92.7%                                       | 99.9%                                       | 12           | Low    |
| 30<br>31                                     | THL (26)                          | Finland                |                                               | EU/EEA     | No                  | National    | Report            | 13 Apr - 28 Dec                  | GP            | Random         | HH/C            | 4863                         | *see report                                                      | FMIA                   | In-house                                                                                          | NR                                            | NR                                          | NR                                          | 7            | Low    |
| 32<br>33<br>34<br>35<br>36<br>37<br>38<br>39 | Carrat (27)                       | France                 | Ile-de-France; Grand Est; Nouvelle-Aquitaine; | EU/EEA     | Yes                 | National    | Pre-print         | 4 May - 23 Jun                   | GP            | Random         | HH/C            | 14628                        | Ile-de- France: 10%; Grand Est: 9.0% ; Nouvelle-Aquitaine: 3.1%; | ELISA; MN              | EUROIMMUN; In-house                                                                               | IgG                                           | ELISA - S=97.7%; ELISA - NP=50.4%; SN=41.4% | ELISA - S=97.7%; ELISA - NP=99.5%; SN=99.5% | 9            | Low    |
| 40<br>41<br>42                               | Zakhashvili (28)                  | Georgia                | Martvili; Kobuleti; Borjomi; Khelvachauri     | non-EU/EEA | Yes                 | National    | Unpublished       | 1 - 14 Aug 2020; 1 - 14 Dec 2020 | GP            | Random         | HH/C            | 1218; 1219                   | August: 0%;0%:0.7%;1.3% December:44.3%;35 %;45.5%;51.3%;         | ELISA; CMIA            | Wantai Total Ab ELISA; Roche Diagnostics                                                          | Total Abs; Total Abs;                         | NR                                          | NR                                          | N/A          | N/A    |
| 43<br>44<br>45<br>46<br>47                   | Tsertsvadze (29)                  | Georgia                | Tblisi                                        | non-EU/EEA | No                  | City/local  | Pre-print         | 18-27 May                        | GP            | Convenience    | HH/C            | 1068                         | 1.02% (0.38-2.18) §                                              | LFA                    | Zhejiang Orient Gene Biotech                                                                      | IgG                                           | 93.1%                                       | 99.2%                                       | 6            | Medium |
|                                              | Aziz (30)                         | Germany                | Bonn                                          | EU/EEA     | Yes; No             | City/local  | Published^        | 24 Apr - 30 Jun                  | GP            | Convenience    | HH/C; Voluntary | Group 1: 4771; Group 2: 360; | 0.97% (0.72-1.30%); 1.94% (0.84-4.42%)                           | ELISA                  | EUROIMMUN                                                                                         | IgG                                           | NR                                          | NR                                          | 7            | Low    |



| 16 | Streck (51)                         | Germany            | Heinsberg                                                                      | EU/EEA     | Yes | City/local | Published^  | 31 Mar - 4 Jun    | GP | Random | HH/C | 919   | 14.1% (11.15% - 17.27%) §                                                       | ELISA                                        | EUROIMMUN;                                                                                       | IgA; IgG       | 90.9%            | 99.1%            | 10  | Low    |
|----|-------------------------------------|--------------------|--------------------------------------------------------------------------------|------------|-----|------------|-------------|-------------------|----|--------|------|-------|---------------------------------------------------------------------------------|----------------------------------------------|--------------------------------------------------------------------------------------------------|----------------|------------------|------------------|-----|--------|
| 17 | Santos-Höivener (32)                | Germany            | Kupferzell                                                                     | EU/EEA     | Yes | City/local | Published   | 20 May - 9 Jun    | GP | Random | HH/C | 2203  | 12% (10.4-14%) §                                                                | ELISA                                        | EUROIMMUN;                                                                                       | IgG            | 88.3%            | 99.2%            | 10  | Low    |
| 18 | Weis (33)                           | Germany            | Thuringia                                                                      | EU/EEA     | No  | Regional   | Published   | 12-22 May         | GP | Random | HH/C | 626   | 8.4%                                                                            | ELISA; ELISA; CLIA; CMIA; CLIA; CLIA         | EUROIMMUN; Epitope Diagnostics Inc. DiaSorin; Abbott Laboratories; Roche Diagnostics; Snibe Co.; | IgG            | NR               | NR               | 10  | Low    |
| 19 | Merkely (34)                        | Hungary            |                                                                                | EU/EEA     | Yes | National   | Published   | 1-16 May          | GP | Random | HH/C | 10474 | 0.68 (0.5-0.86)                                                                 | CMIA                                         | Abbott Laboratories                                                                              | IgG            | NR               | NR               | 6   | Medium |
| 20 | Pagani (35)                         | Italy              | Castiglione D'Adda                                                             | EU/EEA     | Yes | City/local | Published   | 18 May - 7 Jun    | GP | Random | HH/C | 509   | 22.6% (17.2-29.1)                                                               | CMIA; LFA                                    | Abbott Laboratories; Prima Lab                                                                   | IgG            | NR               | NR               | 9   | Low    |
| 21 | Stefanelli (36)                     | Italy              | Trento                                                                         | EU/EEA     | Yes | Regional   | Published   | 5-15 May          | GP | Random | HH/C | 6075  | 25.7% §                                                                         | CMIA                                         | Abbott Laboratories                                                                              | IgG            | 99.60%           | 100%             | 10  | Low    |
| 22 | Guerrero (37)                       | Italy              | Verona                                                                         | EU/EEA     | Yes | City/local | Published   | 24 Apr - 8 May    | GP | Random | HH/C | 1515  | 2.6%                                                                            | CMIA                                         | Abbott Laboratories                                                                              | IgG            | 81.80%           | 99.30%           | 8   | Low    |
| 23 | Cito (38)                           | Italy              | Villa Caldari, Abruzzo region                                                  | EU/EEA     | Yes | Regional   | Published   | 18-19 Apr         | GP | Random | HH/C | 687   | 10.9% (8.8-13.5%)                                                               | ELISA                                        | Beijing Wantai Biological Pharmacy Enterprise;                                                   | Total Abs      | 93%              | 100%             | 9   | Low    |
| 24 | Zuridin & Tatyana (39)              | Kyrgyzstan         | Bishkek City; Osh City; Chui; Osh; Jalal-Abad; Batken; Issyk-Kul; Naryn; Talas | non-EU/EEA | Yes | National   | Unpublished | 4 Jul - 12 Aug    | GP | Random | HH/C | 4780  | 32.5%                                                                           | ELISA                                        | Beijing Wantai Biological Pharmacy Enterprise;                                                   | Total Abs      | 95%              | 100%             | N/A | N/A    |
| 25 | Snoeck (40)                         | Luxembourg         |                                                                                | EU/EEA     | Yes | National   | Pre-print   | 15 Apr - 5 May    | GP | Random | HH/C | 1862  | IgG: 2.09% (1.37-2.82) §<br>IgA: 11.07% (9.54-12.60) §                          | ELISA                                        | EUROIMMUN;                                                                                       | IgG; IgA;      | 85.7%;<br>92.2%; | 97.8%;<br>89.2%; | 8   | Low    |
| 26 | Vos (41)                            | Netherlands        |                                                                                | EU/EEA     | No  | National   | Published   | 31 Mar - 11 May   | GP | Random | HH/C | 3207  | 2.8% (2.1 - 3.7) §                                                              | Fluorescent bead-based multiple ximmunoassay | In-house                                                                                         | IgG            | 84.40%           | NR               | 10  | Low    |
| 27 | Popova (42)                         | Russian Federation | Irkutsk Region                                                                 | non-EU/EEA | No  | Regional   | Published   | 28 Jun - 19 Jul   | GP | Random | HH/C | 2674  | 5.8% (5.3- 6.2)                                                                 | ELISA                                        | In house                                                                                         | IgG            | NR               | NR               | 8   | Low    |
| 28 | Popova (43)                         | Russian Federation | Leningrad                                                                      | non-EU/EEA | No  | Regional   | Published   | 23 Jun - 26 Jun   | GP | Random | HH/C | 3130  | 20.70%                                                                          | ELISA                                        | In house                                                                                         | IgG            | NR               | NR               | 8   | Low    |
| 29 | Barchuk (44)                        | Russian Federation | Saint-Petersburg                                                               | non-EU/EEA | Yes | City/local | Published^  | 27 May - 26 Jun   | GP | Random | HH/C | 1038  | 9.0% CMIA; 10.8% ELISA §                                                        | ELISA; CMIA                                  | CoronaPass; Abbott Laboratories                                                                  | IgG; Total Abs | 98.7%;<br>100%   | 100%;<br>99.6%   | 12  | Low    |
| 30 | Popova (45)                         | Russian Federation | Saint-Petersburg                                                               | non-EU/EEA | No  | City/local | Published   | 15 Jun - 20 Jun   | GP | Random | HH/C | 2713  | 26% (24.3-27.7)                                                                 | ELISA                                        | In house                                                                                         | IgG            | NR               | NR               | 8   | Low    |
| 31 | Popova (46)                         | Russian Federation | Tyunmen region                                                                 | non-EU/EEA | No  | Regional   | Published   | 8 - 21 Jun        | GP | Random | HH/C | 2758  | 24.5% (22.9- 26.1)                                                              | ELISA                                        | In house                                                                                         | IgG            | NR               | NR               | 8   | Low    |
| 32 | Pollan (47)                         | Spain              |                                                                                | EU/EEA     | Yes | National   | Published   | 27 Apr - 11 Ma    | GP | Random | HH/C | 51958 | 4-6% (4.3-5.0) §                                                                | CLIA;LFA                                     | Abbott Laboratories; Zhejiang Orient Gene Biotech                                                | IgG            | 89.7%            | 100%             | 12  | Low    |
| 33 | Public Health Agency of Sweden (48) | Sweden             | Rinkeby-Kista district, Stockholm                                              | EU/EEA     | Yes | City/local | Report      | 22 Jun - 24 Jun   | GP | Random | HH/C | 538   | 18,7% (95% CI 14,8-23,3)                                                        | CMIA; CLIA;LIPS; LFA; ELISA                  | Abbott Laboratories; DiaSorin Liaison                                                            | IgG            | 100              | 99,6             | 11  | Low    |
| 34 | Roxhed (49)                         | Sweden             | Stockholm                                                                      | EU/EEA     | Yes | City/local | Published^  | mid-Apr - mid-May | GP | Random | HH/C | 878   | 12.5% (95% CI: 10.3%-14.7%)                                                     | ELISA                                        | In house                                                                                         | IgM; IgG       | 100%             | 98%              | 7   | Low    |
| 35 | Richard (50)                        | Switzerland        | Canton of Geneva                                                               | non-EU/EEA | Yes | Regional   | Pre-print   | 6 Apr - 30 Jun    | GP | Random | HH/C | 8344  | 7.8% (6.8-8.9)                                                                  | ELISA                                        | EUROIMMUN                                                                                        | IgG            | 93%              | 100%             | 10  | Low    |
| 36 | Bi (51)                             | Switzerland        | Geneva                                                                         | non-EU/EEA | Yes | City/local | Pre-print   | 3 Apr - 30 Jun    | GP | Random | HH/C | 4354  | 6.6%                                                                            | ELISA                                        | EUROIMMUN                                                                                        | IgG            | 93%              | 99%              | 9   | Low    |
| 37 | Stringhini (52)                     | Switzerland        | Geneva                                                                         | non-EU/EEA | Yes | City/local | Published   | 6 April - 9 May   | GP | Random | HH/C | 2766  | 1stweek: 4-8% (2.4-8-0); 2nd week: 8-5% (5.9-11.4); 3rd week: 10-9% (7.9-14.4); | ELISA                                        | EUROIMMUN                                                                                        | IgG            | 93%              | 100%             | 9   | Low    |

|    |                                         |                |                                                                                                          |            |     |                    |            |                                                                                              |    |             |               |                                             |                                                                                     |                           |                                          |               |                                                     |                                                     |    |        |  |
|----|-----------------------------------------|----------------|----------------------------------------------------------------------------------------------------------|------------|-----|--------------------|------------|----------------------------------------------------------------------------------------------|----|-------------|---------------|---------------------------------------------|-------------------------------------------------------------------------------------|---------------------------|------------------------------------------|---------------|-----------------------------------------------------|-----------------------------------------------------|----|--------|--|
| 1  | Ward (53)                               | United Kingdom | England                                                                                                  | non-EU/EEA | No  | National           | Pre-print  | 20 Jun - 13 Jul;<br>31 Jul - 13 Aug;<br>15 Sept - 28 Sept                                    | GP | Random      | HH/C          | 99908; 10582 9;1593 67                      | 5.96 (5.78–6.14); 4.83 (4.67–5.00); 4.38 (4.25–4.51) §                              | LFA                       | Fortress Diagnostics                     | IgG           | 84.4%                                               | 98.6%                                               | 9  | Low    |  |
| 2  |                                         |                |                                                                                                          |            |     |                    |            |                                                                                              |    |             |               |                                             |                                                                                     |                           |                                          |               |                                                     |                                                     |    |        |  |
| 3  |                                         |                |                                                                                                          |            |     |                    |            |                                                                                              |    |             |               |                                             |                                                                                     |                           |                                          |               |                                                     |                                                     |    |        |  |
| 4  | Wells (54)                              | United Kingdom | London; South East England                                                                               | non-EU/EEA | Yes | Regional           | Published  | 27 Apr - 2 Jun                                                                               | GP | Convenience | HH/C          | 431                                         | 12% (9.1–15.2)                                                                      | CLIA;C MIA                | Abbott Laboratories; Roche Diagnostics   | IgM; IgG      | 90%                                                 | 100%                                                | 6  | Medium |  |
| 5  |                                         |                |                                                                                                          |            |     |                    |            |                                                                                              |    |             |               |                                             |                                                                                     |                           |                                          |               |                                                     |                                                     |    |        |  |
| 6  | Residual sera                           |                |                                                                                                          |            |     |                    |            |                                                                                              |    |             |               |                                             |                                                                                     |                           |                                          |               |                                                     |                                                     |    |        |  |
| 7  | Herzog (55)                             | Belgium        | Wallonia; Flanders; Brussels                                                                             | EU/EEA     | Yes | National           | Pre-print  | 30 Mar - 5 Apr;<br>20 Apr - 26 Apr;<br>18 May - 25 May;<br>8 Jun - 13 Jun;<br>29 Jun - 4 Jul | GP | Convenience | RS            | Total: 15529; 3910;3 397;32 42;296 0;3023 ; | 2.9% (2.3–3.6%); 6.0% (5.1–7.1%); 6.9% (5.9–8.0%); 5.5% (4.7–6.5%); 4.5% (3.7–5.4%) | ELISA                     | EUROIMMUN;                               | IgG           | 64.5 - 87.8%                                        | 99.20 %                                             | 5  | Medium |  |
| 8  |                                         |                |                                                                                                          |            |     |                    |            |                                                                                              |    |             |               |                                             |                                                                                     |                           |                                          |               |                                                     |                                                     |    |        |  |
| 9  |                                         |                |                                                                                                          |            |     |                    |            |                                                                                              |    |             |               |                                             |                                                                                     |                           |                                          |               |                                                     |                                                     |    |        |  |
| 10 |                                         |                |                                                                                                          |            |     |                    |            |                                                                                              |    |             |               |                                             |                                                                                     |                           |                                          |               |                                                     |                                                     |    |        |  |
| 11 |                                         |                |                                                                                                          |            |     |                    |            |                                                                                              |    |             |               |                                             |                                                                                     |                           |                                          |               |                                                     |                                                     |    |        |  |
| 12 |                                         |                |                                                                                                          |            |     |                    |            |                                                                                              |    |             |               |                                             |                                                                                     |                           |                                          |               |                                                     |                                                     |    |        |  |
| 13 | Tsaneva-Damyanova (56)                  | Bulgaria       | Varna city; North East Bulgaria                                                                          | EU/EEA     | Yes | Regional           | Published  | 26 Mar - 20 Apr                                                                              | GP | Convenience | RS            | 586                                         | 4.8% overall; 1.0% IgM; 1.2% IgG; 2.6% IgM and IgG                                  | LFA                       | Zhejiang Orient Gene Biotech             | IgM; IgG      | 85%                                                 | 96%                                                 | 4  | Medium |  |
| 14 |                                         |                |                                                                                                          |            |     |                    |            |                                                                                              |    |             |               |                                             |                                                                                     |                           |                                          |               |                                                     |                                                     |    |        |  |
| 15 | Bloomfield (57)                         | Czech Republic | Prague                                                                                                   | EU/EEA     | Yes | City/local         | Published  | 3 Jul - 19 Aug                                                                               | GP | Convenience | RS (Children) | 200                                         | 0% (0–0.5%)                                                                         | ELISA; CLIA               | EUROIMMUN; Roche Diagnostics             | IgA; IgG      | EURO IMMUN; IgA=9 8.6%; IgG=9 4.4%; Elecsys=99.8 %; | EURO IMMUN; IgA=9 8.6%; IgG=9 9.6%; Elecsys=99.8 %; | 3  | High   |  |
| 16 |                                         |                |                                                                                                          |            |     |                    |            |                                                                                              |    |             |               |                                             |                                                                                     |                           |                                          |               |                                                     |                                                     |    |        |  |
| 17 |                                         |                |                                                                                                          |            |     |                    |            |                                                                                              |    |             |               |                                             |                                                                                     |                           |                                          |               |                                                     |                                                     |    |        |  |
| 18 |                                         |                |                                                                                                          |            |     |                    |            |                                                                                              |    |             |               |                                             |                                                                                     |                           |                                          |               |                                                     |                                                     |    |        |  |
| 19 |                                         |                |                                                                                                          |            |     |                    |            |                                                                                              |    |             |               |                                             |                                                                                     |                           |                                          |               |                                                     |                                                     |    |        |  |
| 20 |                                         |                |                                                                                                          |            |     |                    |            |                                                                                              |    |             |               |                                             |                                                                                     |                           |                                          |               |                                                     |                                                     |    |        |  |
| 21 | Krleza (58)                             | Croatia        | Zagreb                                                                                                   | EU/EEA     | No  | National           | Published^ | 13 – 29 May ;<br>24 Oct – 23 Nov                                                             | GP | Convenience | RS (Children) | 240; 308                                    | 2.9%; 8.4%                                                                          | ELISA; CLIA; MN           | Vircell; Roche Cobas Elecsys; In-house   | NR            | NR                                                  | NR                                                  | 3  | High   |  |
| 22 |                                         |                |                                                                                                          |            |     |                    |            |                                                                                              |    |             |               |                                             |                                                                                     |                           |                                          |               |                                                     |                                                     |    |        |  |
| 23 |                                         |                |                                                                                                          |            |     |                    |            |                                                                                              |    |             |               |                                             |                                                                                     |                           |                                          |               |                                                     |                                                     |    |        |  |
| 24 | Capai (59)                              | France         | Corsica                                                                                                  | EU/EEA     | Yes | Regional           | Published  | 16 Apr - 15 Jun                                                                              | GP | Convenience | RS            | 1973                                        | 5.5% (4.5–6.6%) §                                                                   | ELISA; MN                 | EUROIMMUN; In-house                      | IgG           | NR                                                  | NR                                                  | 8  | Low    |  |
| 25 | Cohen (60)                              | France         |                                                                                                          | EU/EEA     | Yes | City/local         | Pre-print  | 14 Apr - 12 May                                                                              | GP | Convenience | RS (Children) | 605                                         | 10.7% (8.4–13.5)                                                                    | LFA                       | Biosynex BSS test                        | IgM; IgG      | 91.8%                                               | 99.2%                                               | 5  | Medium |  |
| 26 |                                         |                |                                                                                                          |            |     |                    |            |                                                                                              |    |             |               |                                             |                                                                                     |                           |                                          |               |                                                     |                                                     |    |        |  |
| 27 | Le Vu (61)                              | France         |                                                                                                          | EU/EEA     | Yes | National           | Published^ | 9 Mar - 15 Mar;<br>6 Apr - 12 Apr;<br>11 May - 17 May;                                       | GP | Convenience | RS            | Total: 11 021;38 34;359 5;3592 ;            | March:0.41% [0.05–0.88] §; April: 4.14% [3.31–4.99] §; May: 4.93% [4.02–5.89] §     | LuLISA ;MN                | In-house;In-house;                       | IgG;NT-Abs    | LuLISA A N=86 %; LuLISA A S=96 %                    | LuLISA A =100% ; LuLISA A =100%                     | 13 | Low    |  |
| 28 |                                         |                |                                                                                                          |            |     |                    |            |                                                                                              |    |             |               |                                             |                                                                                     |                           |                                          |               |                                                     |                                                     |    |        |  |
| 29 |                                         |                |                                                                                                          |            |     |                    |            |                                                                                              |    |             |               |                                             |                                                                                     |                           |                                          |               |                                                     |                                                     |    |        |  |
| 30 |                                         |                |                                                                                                          |            |     |                    |            |                                                                                              |    |             |               |                                             |                                                                                     |                           |                                          |               |                                                     |                                                     |    |        |  |
| 31 |                                         |                |                                                                                                          |            |     |                    |            |                                                                                              |    |             |               |                                             |                                                                                     |                           |                                          |               |                                                     |                                                     |    |        |  |
| 32 | Bogogiannidou (62)                      | Greece         |                                                                                                          | EU/EEA     | Yes | National           | Published  | 1 Mar - 30 Apr                                                                               | GP | Convenience | RS            | 6586                                        | March = 0 (0–0.23%) §; April=0.23% (0–0.48%) §                                      | ELISA; ELISA; CMIA        | EUROIMMUN; Vircell; Abbott Laboratories; | IgG           | 84%                                                 | 99.7%                                               | 8  | Low    |  |
| 33 |                                         |                |                                                                                                          |            |     |                    |            |                                                                                              |    |             |               |                                             |                                                                                     |                           |                                          |               |                                                     |                                                     |    |        |  |
| 34 | Gudbjartsson (63)                       | Iceland        |                                                                                                          | EU/EEA     | Yes | Regional; National | Published  | 18 Feb - 9 Mar                                                                               | GP | Convenience | RS            | 470; 24115                                  | 0%; RS: 0.30% (0.2 - 0.4) §; Reykjavik: 0.4% (0.3 - 0.6)                            | ELISA; ELISA; ELISA; CLIA | EUROIMMUN; EDI/Eagle;Roche Diagnostics   | IgA; IgM; IgG | NR                                                  | 99.80 %                                             | 9  | Low    |  |
| 35 |                                         |                |                                                                                                          |            |     |                    |            |                                                                                              |    |             |               |                                             |                                                                                     |                           |                                          |               |                                                     |                                                     |    |        |  |
| 36 |                                         |                |                                                                                                          |            |     |                    |            |                                                                                              |    |             |               |                                             |                                                                                     |                           |                                          |               |                                                     |                                                     |    |        |  |
| 37 | Public Health Agency of Sweden (64, 65) | Sweden         | Jämtland; Härjedalen; Jönköping; Kalmar; Skåne; Stockholm; Uppsala; Västerbotten; Västra Götaland;Örebro | EU/EEA     | No  | National           | Report     | 20 Apr to 12 Jun;<br>12 Oct to 23 Oct;<br>Nov 23 to 4 Dec                                    | GP | Convenience | RS            | 4500 per collection period                  | *see report                                                                         | NR                        | Sci Life Lab / KTH                       | NR            | 98.9                                                | 99.4                                                | 6  | Low    |  |
| 38 |                                         |                |                                                                                                          |            |     |                    |            |                                                                                              |    |             |               |                                             |                                                                                     |                           |                                          |               |                                                     |                                                     |    |        |  |
| 39 |                                         |                |                                                                                                          |            |     |                    |            |                                                                                              |    |             |               |                                             |                                                                                     |                           |                                          |               |                                                     |                                                     |    |        |  |
| 40 |                                         |                |                                                                                                          |            |     |                    |            |                                                                                              |    |             |               |                                             |                                                                                     |                           |                                          |               |                                                     |                                                     |    |        |  |
| 41 |                                         |                |                                                                                                          |            |     |                    |            |                                                                                              |    |             |               |                                             |                                                                                     |                           |                                          |               |                                                     |                                                     |    |        |  |
| 42 |                                         |                |                                                                                                          |            |     |                    |            |                                                                                              |    |             |               |                                             |                                                                                     |                           |                                          |               |                                                     |                                                     |    |        |  |
| 43 | Posfay-Barbe (66)                       | Switzerland    | Geneva                                                                                                   | non-EU/EEA | No  | City/local         | Published  | 1–30 Apr                                                                                     | GP | Convenience | RS            | 208                                         | ELISA: 9.1%; LFA: 12.5%                                                             | ELISA; LFA                | EUROIMMUN                                | IgG           | NR; 88.9%                                           | NR; 94.7%                                           | 2  | High   |  |
| 44 |                                         |                |                                                                                                          |            |     |                    |            |                                                                                              |    |             |               |                                             |                                                                                     |                           |                                          |               |                                                     |                                                     |    |        |  |
| 45 |                                         |                |                                                                                                          |            |     |                    |            |                                                                                              |    |             |               |                                             |                                                                                     |                           |                                          |               |                                                     |                                                     |    |        |  |
| 46 |                                         |                |                                                                                                          |            |     |                    |            |                                                                                              |    |             |               |                                             |                                                                                     |                           |                                          |               |                                                     |                                                     |    |        |  |
| 47 |                                         |                |                                                                                                          |            |     |                    |            |                                                                                              |    |             |               |                                             |                                                                                     |                           |                                          |               |                                                     |                                                     |    |        |  |

| Page | Author                        | Country                | Region                                                                                      | EU/EEA     | Yes | National   | Published              | Date                                                               | GP | Convenience | RS | Value                                     | CI                                                                                | Method            | Company                                                                      | Ab            | Sp                     | Se                                           | PPV | NPV    | LR | MD |
|------|-------------------------------|------------------------|---------------------------------------------------------------------------------------------|------------|-----|------------|------------------------|--------------------------------------------------------------------|----|-------------|----|-------------------------------------------|-----------------------------------------------------------------------------------|-------------------|------------------------------------------------------------------------------|---------------|------------------------|----------------------------------------------|-----|--------|----|----|
| 51   | Dickson (67)                  | United Kingdom         | Scotland                                                                                    | non-EU/EEA | Yes | National   | Published              | 20 Apr - 15 Jun                                                    | GP | Convenience | RS | 4751                                      | 4.3% (4.2-4.5)                                                                    | CLIA              | DiaSorin Liaison                                                             | IgG           | 87.5%                  | 98.6%                                        | 3   | High   |    |    |
| 52   | Public Health Scotland (68)   | United Kingdom         | Scotland                                                                                    | EU/EEA     | Yes | National   | Report                 | 20 Apr - 17 May; 18 May - 14 Jun; 15 Jun - 12 Jul; 13 Jul - 9 Aug; | GP | Convenience | RS | 2039; 172; 2709; 2882                     | 4.1% (2.4%, 5.7%); 3.4% (1.8%, 5.0%); 3.9% (2.3%, 5.4%); 3.7% (2.2%, 5.2%)        | CMIA              | DiaSorin Liaison                                                             | NR            | NR                     | NR                                           | 4   | Medium |    |    |
| 53   | Musa (69)                     | Bosnia and Herzegovina | Federation of Bosnia and Herzegovina                                                        | non-EU/EEA | Yes | Regional   | Unpublished            | 1 Nov - 7 Dec                                                      | BD | Convenience | BD | 1015                                      | 19.1% (16.7-21.5)                                                                 | CMIA              | Abbott Laboratories                                                          | Total Abs;    | NR                     | NR                                           | N/A | N/A    |    |    |
| 54   | Pedersen (70)                 | Denmark                | Danish Capital Region; Zealand Region; Central Denmark Region                               | EU/EEA     | Yes | National   | Published              | 2 Jun - 19 Jun                                                     | BD | Convenience | BD | Total: 2311; 17-69yrs: 1110; >70yrs: 1201 | 17-69yrs: 2.5 (1.3-3.8) <sup>§</sup> ; >70yrs: 1.4 (0.3-2.5) <sup>§</sup>         | ELISA             | Beijing Wantai Biological Pharmacy Enterprise;                               | Total Abs;    | 96.7% (92.4-98.6)      | 99.5% (98.7-99.8)                            | 7   | Low    |    |    |
| 55   | Erikstrup (71)                | Denmark                |                                                                                             | EU/EEA     | Yes | National   | Published <sup>^</sup> | 6 Apr - 3 May                                                      | BD | Random      | BD | 20 640                                    | 2.0% (95% CI, 1.8-2.2%); 1.9% (95% CI, 1.8-2.3) <sup>§</sup>                      | LFA               | Livzon Diagnostics Inc                                                       | IgM; IgG      | 82.6%                  | 99.5%                                        | 7   | Low    |    |    |
| 56   | Bloddonor (72)                | Denmark                |                                                                                             | EU/EEA     | No  | National   | Report                 | 5 Oct - 31 Dec                                                     | BD | Convenience | BD | 71883                                     | *see report                                                                       | LFA               | Livzon                                                                       | NR            | NR                     | NR                                           | 4   | Medium |    |    |
| 57   | Gallian (73)                  | France                 | Haut-Rhin departmental area [DA]; Seine-Saint-Denis DA; Bouches-du-Rhône DA; Oise DA; Lille | EU/EEA     | No  | National   | Published              | 23 Mar - 5 Apr                                                     | BD | Convenience | BD | 998                                       | 2.71%                                                                             | MN                | In-house                                                                     | NT-Abs        | NR                     | 100%                                         | 6   | Medium |    |    |
| 58   | Grzelak (74)                  | France                 |                                                                                             | EU/EEA     | No  | City/local | Published              | 20-24 Mar                                                          | BD | Convenience | BD | 200                                       | 3%                                                                                | ELISA; LIPS; MN   | In-house; In-house; In-house;                                                | IgA; IgG; IgM | NR                     | NR                                           | 3   | High   |    |    |
| 59   | Fischer (75)                  | Germany                | Hesse; Lower Saxony; North Rhine-Westphalia                                                 | EU/EEA     | Yes | National   | Published              | Mar - Jun                                                          | BD | Convenience | BD | 3186                                      | 0.91% (0.58-1.24)                                                                 | ELISA; CLIA; CMIA | EUROIMMUN; Diasorin Liaison; Abbott Laboratories                             | IgG           | 65%                    | 99-100%                                      | 4   | Medium |    |    |
| 60   | Runkel (76)                   | Germany                | Southwest                                                                                   | EU/EEA     | Yes | Regional   | Published              | Mar - Jun                                                          | BD | Convenience | BD | 3754                                      | 0.40%                                                                             | ELISA; CLIA; CMIA | Epitope Diagnostics; Immundiagnostik AG; Abbott Architect; Roche Diagnostics | IgG           | NR                     | Abbott =99.6%; DK5000=99.00-99.1%; EDI=96.4% | 7   | Low    |    |    |
| 61   | Percivalle (77)               | Italy                  | Lombardy                                                                                    | EU/EEA     | Yes | City/local | Published              | 18 Mar - 6 Apr                                                     | BD | Convenience | BD | 390                                       | 23%                                                                               | MN                | In-house                                                                     | NT-Abs        | 95%                    | 100%                                         | 6   | Medium |    |    |
| 62   | Fiore (78)                    | Italy                  | South East                                                                                  | EU/EEA     | No  | Regional   | Published              | 1-31 May                                                           | BD | Convenience | BD | 904                                       | 0.99%                                                                             | CLIA              | Snibe Co., Ltd.                                                              | IgM; IgG      | IgM=78.65%; IgG=91.21% | IgM=97.5%; IgG=97.3%                         | 4   | Medium |    |    |
| 63   | Valenti (79)                  | Italy                  | Milan                                                                                       | EU/EEA     | Yes | City/local | Pre-print              | 24 Feb - 8 Apr                                                     | BD | Convenience | BD | 789                                       | February/March: 2.7% (95% CI, 0.3-6.0%); March/April: 5.2% (2.4-9.0) <sup>§</sup> | LFA               | Prima Lab                                                                    | IgM; IgG      | IgM=68%; IgG=100%      | 99.20%                                       | 10  | Low    |    |    |
| 64   | Slot (80)                     | Netherlands            |                                                                                             | EU/EEA     | Yes | National   | Published              | 1-15 Apr                                                           | BD | Convenience | BD | 7361                                      | 3.40%                                                                             | ELISA             | Beijing Wantai Biological Pharmacy Enterprise;                               | IgA; IgM; IgG | 100%                   | 99.1-100%                                    | 5   | Medium |    |    |
| 65   | Lundkvist (81)                | Sweden                 | Djurgårdsstaden and Tensta (Stockholm)                                                      | EU/EEA     | Yes | City/local | Published              | 17-18 Jun                                                          | BD | Random      | BD | 213                                       | Djurgårdsstaden: 4.1% (0.6-7.6%); Tensta: 30.0% (20.3-39.7%)                      | LFA               | Zhejiang Orient Gene Biotech                                                 | IgM; IgG      | IgM=100%; IgG=100%     | IgM=100%; IgG=95.5%                          | 6   | Medium |    |    |
| 66   | Public Health England (82-87) | United Kingdom         | England                                                                                     | non-EU/EEA | Yes | National   | Report                 | 23 Mar - 3 Dec                                                     | BD | Convenience | BD | 1000 sample s/week /region                | *see report                                                                       | ELISA             | EUROIMMUN                                                                    | IgG           | 79%                    | 99%                                          | 4   | Medium |    |    |
| 67   | Thompson (88)                 | United Kingdom         | Scotland                                                                                    | non-EU/EEA | Yes | National   | Published              | 17 Mar - 18 May                                                    | BD | Convenience | BD | 3500                                      | 3.17%                                                                             | CLIA; CMIA        | Abbott Laboratories; Roche Diagnostics                                       | IgM; IgG      | 94.1%                  | 100%                                         | 8   | Low    |    |    |

|                                                   |                             |                |                              |            |     |            |           |                 |    |             |                                                  |                                                                                                                                              |                                                 |                       |                                           |                    |                                |                            |    |    |     |        |
|---------------------------------------------------|-----------------------------|----------------|------------------------------|------------|-----|------------|-----------|-----------------|----|-------------|--------------------------------------------------|----------------------------------------------------------------------------------------------------------------------------------------------|-------------------------------------------------|-----------------------|-------------------------------------------|--------------------|--------------------------------|----------------------------|----|----|-----|--------|
| 68                                                | Public Health Scotland (68) | United Kingdom | Scotland                     | EU/EEA     | Yes | National   | Report    | 29 Jun - 9 Aug  | BD | Convenience | BD                                               | 3220                                                                                                                                         | 3.1% (2.5%, 3.8%)                               | NR                    | NR                                        | NR                 | NR                             | NR                         | NR | NR | NR  |        |
| <b>Patients seeking healthcare (non-COVID-19)</b> |                             |                |                              |            |     |            |           |                 |    |             |                                                  |                                                                                                                                              |                                                 |                       |                                           |                    |                                |                            |    |    |     |        |
| 69                                                | Fogel (89)                  | France         | Paris                        | EU/EEA     | No  | City/local | Published | 1 Jun - 31 Aug  | GP | Convenience | PSC                                              | 249                                                                                                                                          | 2.8%                                            | CMIA                  | Abbott Laboratories                       | IgG                | NR                             | NR                         | NR | NR | 2   | High   |
| 70                                                | Choi (90)                   | Germany        | Berlin                       | EU/EEA     | No  | City/local | Published | 19 Mar - 19 May | GP | Convenience | PSC                                              | 223                                                                                                                                          | 7.20%                                           | ELISA; IFIT; PRNT     | EUROIMMUN; In house; In house             | IgA; IgG           | NR                             | NR                         | NR | NR | 1   | High   |
| 71                                                | Rauber (91)                 | Germany        | Heidelberg                   | EU/EEA     | No  | City/local | Published | 5 May - 8 Jun   | GP | Convenience | PSC                                              | 219                                                                                                                                          | 3.2%                                            | ELISA                 | EUROIMMUN                                 | IgG                | 94.6%                          | 99.8%                      | NR | NR | 1   | High   |
| 72                                                | Zambelli (92)               | Italy          | Bergamo                      | EU/EEA     | No  | City/local | Published | 1-30 Apr        | GP | Convenience | PSC                                              | 560                                                                                                                                          | 31%                                             | LFA                   | Moers                                     | IgM; IgG           | NR                             | NR                         | NR | NR | 2   | High   |
| 73                                                | Medas (93)                  | Italy          | Cagliari                     | EU/EEA     | No  | City/local | Published | 31 Mar - 30 Jun | GP | Convenience | PSC                                              | 86                                                                                                                                           | 5.8%                                            | CLIA                  | Snibe Co., Ltd                            | IgM; IgG           | NR                             | NR                         | NR | NR | 1   | High   |
| 74                                                | Capasso (94)                | Italy          | Campania Region              | EU/EEA     | No  | Regional   | Published | 11 May - 15 Jun | GP | Convenience | PSC                                              | 310                                                                                                                                          | 2.90%                                           | LFA                   | Shanghai Kehua LFAI                       | IgM; IgG           | 66%                            | 96.60%                     | NR | NR | 4   | Medium |
| 75                                                | Cento (95)                  | Italy          | Milan                        | EU/EEA     | No  | City/local | Published | 11 May - 5 Jul  | GP | Convenience | PSC                                              | 2753                                                                                                                                         | 5.1% (4.3%-6.0%)                                | CLIA; CLIA            | Abbott Laboratories DiaSorin Liaison      | IgG                | 84.2-100%                      | 99.6-100%                  | NR | NR | 4   | Medium |
| 76                                                | Berte (96)                  | Italy; Germany | Milan and Cagliari; Erlangen | EU/EEA     | No  | Regional   | Published | Apr - Jun       | GP | Convenience | PSC                                              | 354; Milan, Italy: 129; Cagliari, Italy: 48; Erlangen, Germany: 177                                                                          | 2.3% (0.8- 3.8)                                 | ELISA                 | In house                                  | IgA; IgG           | IgA=7.14%; IgG=9.8%; 7.64%     | IgA=9.8%; IgG=9.5.2%       | NR | NR | 4   | Medium |
| 77                                                | Vena (97)                   | Italy          | Liguria; Lombardia           | EU/EEA     | No  | Regional   | Published | Mar - Apr       | GP | Convenience | PSC                                              | 3609                                                                                                                                         | 11% (10.0-12.1)                                 | CLIA; LFA; LFA        | MaglumiTM; Realy tech; Biosynex BSS       | IgM; IgG           | IgM=7.8.6-100%; IgG=9.0.6-100% | IgM=8.7.5%; IgG=9.0.6-100% | NR | NR | 4   | Medium |
| 78                                                | Cabezón-Gutiérrez (98)      | Spain          | Madrid                       | EU/EEA     | No  | City/local | Published | 29 May - 19 Jun | GP | Convenience | PSC                                              | 229                                                                                                                                          | 31.40%                                          | LFA                   | Hangzhou Testsea Biotechnology            | IgM; IgG           | IgM=8.8%; IgG=9.6%             | IgM=1.00%; IgG=1.00%       | NR | NR | 4   | Medium |
| 79                                                | Prados (99)                 | Spain          |                              | EU/EEA     | No  | National   | Published | 27 Apr - 26 Jun | GP | Convenience | PSC                                              | 6140                                                                                                                                         | 0.70%                                           | ELISA                 | EDI Epitope Diagnostics                   | IgM; IgG           | NR                             | NR                         | NR | NR | 3   | High   |
| 80                                                | Clarke (100)                | United Kingdom | London                       | non-EU/EEA | No  | City/local | Published | 27 Apr - 7 May  | GP | Convenience | PSC                                              | 356                                                                                                                                          | 36.2%                                           | CMIA                  | Abbott Laboratories                       | IgG                | NR                             | NR                         | NR | NR | 3   | High   |
| 81                                                | Prendecki (101)             | United Kingdom | London                       | non-EU/EEA | No  | City/local | Published | 1-30 Jun        | GP | Convenience | PSC                                              | 855                                                                                                                                          | 8.1% (95% CI, 6.4 to 10.1); 10.4% (8.5 - 12.6%) | CMIA; LFA             | Abbott Laboratories; Fortress Diagnostics | IgG                | 90.6%; 96.5%                   | NR                         | NR | NR | 4   | Medium |
| <b>Pregnant or parturient women</b>               |                             |                |                              |            |     |            |           |                 |    |             |                                                  |                                                                                                                                              |                                                 |                       |                                           |                    |                                |                            |    |    |     |        |
| 82                                                | Egerup (102)                | Denmark        | Copenhagen                   | EU/EEA     | No  | City/local | Published | 4 Apr - 3 Jul   | GP | Convenience | Pregnant or parturient women; Partners: Newborns | Total: 3707; Pregnant or parturient women: 2.6% (1.7-4.0) <sup>§</sup> ; Partners: 3.5% (2.3 - 5.1) <sup>§</sup> Newborns: 1.4% <sup>§</sup> | CLIA                                            | Shenzhen Yhlo Biotech | IgM; IgG                                  | IgM=4.2%; IgG=9.4% | IgM=9.9.7%; IgG=9.9.3%         | NR                         | NR | 7  | Low |        |
| 83                                                | Mattern (103)               | France         | Paris                        | EU/EEA     | Yes | City/local | Published | 4-31 May        | GP | Convenience | Pregnant or parturient women                     | 249                                                                                                                                          | 8%                                              | CMIA                  | Abbott Laboratories                       | IgG                | NR                             | NR                         | NR | NR | 3   | High   |
| 84                                                | Tsatsaris (104)             | France         | Paris                        | EU/EEA     | Yes | City/local | Published | 29 Apr - 26 Jun | GP | Convenience | Pregnant or                                      | 529                                                                                                                                          | 4.7% (3.0-6.7%)                                 | CMIA                  | Abbott Laboratories                       | IgG                | 92.7 - 97.3 %                  | >99%                       | NR | NR | 3   | High   |

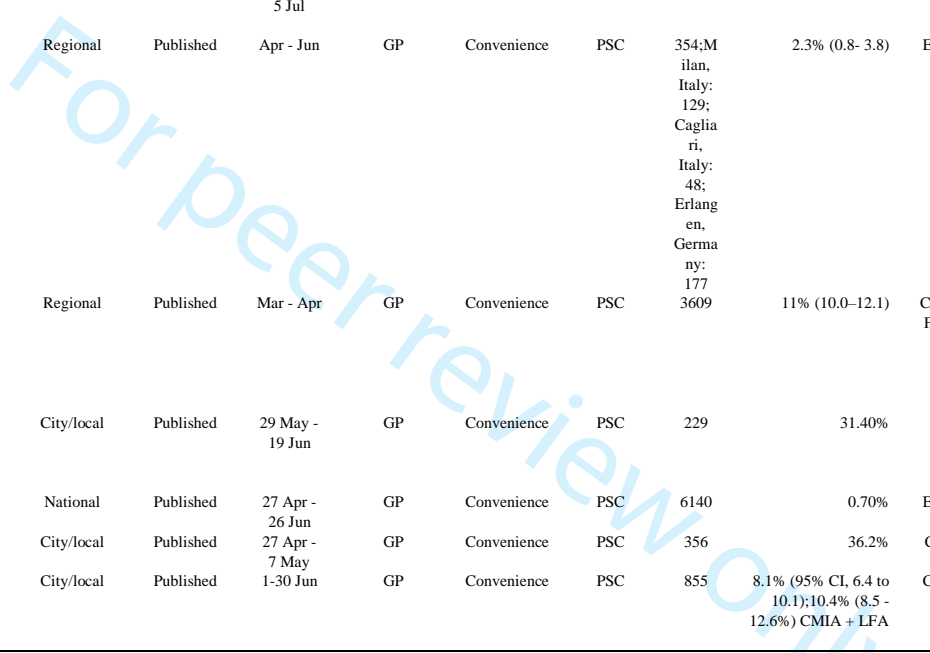

|     |                    |                     |                                               |            |     |            |             |                                 |       |             |                                            |                  |                                                        |                      |                                                          |               |                       |                       |     |        |
|-----|--------------------|---------------------|-----------------------------------------------|------------|-----|------------|-------------|---------------------------------|-------|-------------|--------------------------------------------|------------------|--------------------------------------------------------|----------------------|----------------------------------------------------------|---------------|-----------------------|-----------------------|-----|--------|
| 85  | Cosma (105)        | Italy               | Turin4/6/2020                                 | EU/EEA     | No  | City/local | Published   | 16 Apr - 4 Jun                  | GP    | Convenience | parturient women Pregnant or               | 138              | 5.80%                                                  | CLIA;LFA;LFA         | DiaSorin Liaison; Boditech;AFIAS                         | IgM; IgG      | NR                    | NR                    | 2   | High   |
| 1   |                    |                     |                                               |            |     |            |             |                                 |       |             | parturient women Pregnant or               |                  |                                                        |                      |                                                          |               |                       |                       |     |        |
| 86  | Crovetto (106)     | Spain               | Madrid                                        | EU/EEA     | Yes | City/local | Pre-print   | 14 Apr - 5 May                  | GP    | Convenience | parturient women Pregnant or               | 874              | 14.3%                                                  | CLIA                 | Vircell                                                  | IgA; IgM; IgG | IgM/IgA=89%; IgG=70%  | IgM/IgA=99%; IgG=89%  | 2   | High   |
| 2   |                    |                     |                                               |            |     |            |             |                                 |       |             | parturient women Pregnant or               |                  |                                                        |                      |                                                          |               |                       |                       |     |        |
| 3   |                    |                     |                                               |            |     |            |             |                                 |       |             | parturient women Pregnant or               |                  |                                                        |                      |                                                          |               |                       |                       |     |        |
| 4   |                    |                     |                                               |            |     |            |             |                                 |       |             | parturient women Pregnant or               |                  |                                                        |                      |                                                          |               |                       |                       |     |        |
| 85  | Villalafn(107)     | Spain               | Madrid                                        | EU/EEA     | No  | City/local | Published   | 28 Feb - 10 May                 | GP    | Convenience | Pregnant or                                | 769              | 11.2%                                                  | ELISA                | In house                                                 | IgG           | NR                    | NR                    | 2   | High   |
| 5   |                    |                     |                                               |            |     |            |             |                                 |       |             | parturient women Pregnant or               |                  |                                                        |                      |                                                          |               |                       |                       |     |        |
| 6   |                    |                     |                                               |            |     |            |             |                                 |       |             | parturient women Pregnant or               |                  |                                                        |                      |                                                          |               |                       |                       |     |        |
| 7   |                    |                     |                                               |            |     |            |             |                                 |       |             | parturient women Pregnant or               |                  |                                                        |                      |                                                          |               |                       |                       |     |        |
| 88  | Lumley (108)       | United Kingdom      | Oxford                                        | non-EU/EEA | Yes | City/local | Published   | 14 Apr - 15 Jun                 | GP    | Convenience | Pregnant or                                | 1000             | 5.3% (4.0-6.9)                                         | CLIA                 | In house                                                 | IgG           | 99.1%                 | 99%                   | 4   | Medium |
| 8   |                    |                     |                                               |            |     |            |             |                                 |       |             | parturient women Pregnant or               |                  |                                                        |                      |                                                          |               |                       |                       |     |        |
| 9   |                    |                     |                                               |            |     |            |             |                                 |       |             | parturient women Pregnant or               |                  |                                                        |                      |                                                          |               |                       |                       |     |        |
| 10  |                    |                     |                                               |            |     |            |             |                                 |       |             | parturient women Pregnant or               |                  |                                                        |                      |                                                          |               |                       |                       |     |        |
| 11  | Krátká (109)       | Czech Republic      | Stratonice; Pisek                             | EU/EEA     | No  | Regional   | Published   | 4-15 May                        | Other | NR          | Employee s                                 | 2011             | Stratonice 2.9%; Pisek 1.9%                            | ELISA                | EUROIMMUN;                                               | IgA; IgG      | IgA=9.2%; IgG=9.4%    | IgA=9.2%; IgG=9.6%    | 5   | Medium |
| 12  |                    |                     |                                               |            |     |            |             |                                 |       |             | Employee s                                 |                  |                                                        |                      |                                                          |               |                       |                       |     |        |
| 13  |                    |                     |                                               |            |     |            |             |                                 |       |             | Employee s                                 |                  |                                                        |                      |                                                          |               |                       |                       |     |        |
| 14  | Jerkovic (110)     | Croatia             | Split-Dalmatia; Sibenik-Knin County           | EU/EEA     | No  | Regional   | Published   | 23-28 Apr                       | Other | Convenience | Employee s - voluntary                     | 1494             | 1.27% (0.8-2.0%)                                       | LFA                  | AMP Diagnostics                                          | IgM; IgG      | IgM:9.5.7%; IgG:91.8% | IgM=9.7.3%; IgG=96.4% | 6   | Medium |
| 15  |                    |                     |                                               |            |     |            |             |                                 |       |             | Employee s - voluntary                     |                  |                                                        |                      |                                                          |               |                       |                       |     |        |
| 16  | Vince (111)        | Croatia             |                                               | EU/EEA     | No  | National   | Pre-print   | 20 May - 31 Jul                 | Other | Convenience | Football players                           | 305              | 20%                                                    | ELISA                | EUROIMMUN;                                               | IgA; IgG      | NR                    | NR                    | 2   | High   |
| 17  |                    |                     |                                               |            |     |            |             |                                 |       |             | Football players                           |                  |                                                        |                      |                                                          |               |                       |                       |     |        |
| 18  | Anna (112)         | France              | Ile-de-France: Paris; Saint-Cloud; Orsay      | EU/EEA     | No  | City/local | Published   | 28 Apr - 31 Jul                 | Other | Convenience | Employee s - voluntary                     | 1847             | 11.6%                                                  | LuLISA ;MN           | In-house;In-house;                                       | IgG           | NR                    | 98%                   | 6   | Medium |
| 19  |                    |                     |                                               |            |     |            |             |                                 |       |             | Employee s - voluntary                     |                  |                                                        |                      |                                                          |               |                       |                       |     |        |
| 20  | Fontanet (113)     | France              | Oise                                          | EU/EEA     | No  | City/local | Published^  | 30 Mar - 4Apr; 28 Mar - 30 Apr  | Other | Convenience | HH/C samples; ;High school; Primary school | 664<br>1340      | 25%; 10%                                               | ELISA; S-flow; LIPS; | In-house;In-house; In-house                              | IgG           | 99.4%                 | >99%                  | 8   | Low    |
| 21  |                    |                     |                                               |            |     |            |             |                                 |       |             | HH/C samples; ;High school; Primary school |                  |                                                        |                      |                                                          |               |                       |                       |     |        |
| 22  |                    |                     |                                               |            |     |            |             |                                 |       |             | HH/C samples; ;High school; Primary school |                  |                                                        |                      |                                                          |               |                       |                       |     |        |
| 23  | Roederer (114)     | France              | Paris                                         | EU/EEA     | No  | City/local | Published^  | 23 Jun - 2 Jul                  | Other | Convenience | Persons experiencing homelessness          | 818              | 52%                                                    | LuLISA * ;MN         | In-house                                                 | IgG           | NR                    | 97-100%               | 9   | Low    |
| 24  |                    |                     |                                               |            |     |            |             |                                 |       |             | Persons experiencing homelessness          |                  |                                                        |                      |                                                          |               |                       |                       |     |        |
| 25  |                    |                     |                                               |            |     |            |             |                                 |       |             | Persons experiencing homelessness          |                  |                                                        |                      |                                                          |               |                       |                       |     |        |
| 26  | Krähling (115)     | Germany             | Frankfurt am Main                             | EU/EEA     | No  | City/local | Pre-print   | 6-14 Apr                        | Other | Convenience | Employee s                                 | 998              | 2.90%                                                  | ELISA                | In-house;                                                | IgG           | 87.2-100%             | 99.2%                 | 4   | Medium |
| 27  |                    |                     |                                               |            |     |            |             |                                 |       |             | Employee s                                 |                  |                                                        |                      |                                                          |               |                       |                       |     |        |
| 28  | Mack (116)         | Germany             |                                               | EU/EEA     | No  | National   | Published   | May; June                       | Other | Convenience | Professional football teams                | 1184             | May: 1.99% (1.33-2.97); June: 2.09% (1.37-3.17); 48.4% | ELISA; CLIA          | EUROIMMUN;Roche Diagnostics                              | IgG           | NR                    | NR                    | 3   | High   |
| 29  |                    |                     |                                               |            |     |            |             |                                 |       |             | Professional football teams                |                  |                                                        |                      |                                                          |               |                       |                       |     |        |
| 30  | Ceban (117)        | Republic of Moldova |                                               | non EU/EEA | Yes | National   | Unpublished | 17 Nov 2020 - 15 Jan 2021       | Other | Random      | Hospital visitors                          | 5656             |                                                        | ELISA                | Beijing Wantai Biological Pharmacy Enterprise            | Total Ab      | NR                    | NR                    | N/A | N/A    |
| 31  |                    |                     |                                               |            |     |            |             |                                 |       |             | Hospital visitors                          |                  |                                                        |                      |                                                          |               |                       |                       |     |        |
| 32  | Gujski (118)       | Poland              | Mazowieckie Province                          | EU/EEA     | No  | Regional   | Published   | 22 Jun - 8 Jul                  | Other | Random      | Employee s                                 | 5082             | 4.30%                                                  | ELISA                | Vircell                                                  | IgA; IgM; IgG | 65% - 97%             | 82% - 96%             | 3   | High   |
| 33  |                    |                     |                                               |            |     |            |             |                                 |       |             | Employee s                                 |                  |                                                        |                      |                                                          |               |                       |                       |     |        |
| 34  | Pérez-García (119) | Spain               | Madrid                                        | EU/EEA     | No  | City/local | Published   | 5 Mar - 30 May                  | Other | Convenience | Employee s                                 | 2963             | 22.40%                                                 | LFA                  | AllTest Biotech                                          | IgM; IgG      | 88%                   | 100%                  | 4   | Medium |
| 35  |                    |                     |                                               |            |     |            |             |                                 |       |             | Employee s                                 |                  |                                                        |                      |                                                          |               |                       |                       |     |        |
| 105 | Ulyte (120)        | Switzerland         | Canton of Zurich                              | non-EU/EEA | No  | Regional   | Published^  | 16 Jun - 9 Jul; 26 Oct - 19 Nov | Other | Random      | School children                            | 5155; 2603; 2552 | 7.8% (6.2% to 9.5%); 2.4% (1.4-3.5); 4.5% (3.2-6.0);   | ELISA                | In-house                                                 | IgA; IgM; IgG | 93.3-94.3%            | 99-99.6%              | 6   | Medium |
| 36  |                    |                     |                                               |            |     |            |             |                                 |       |             | School children                            |                  |                                                        |                      |                                                          |               |                       |                       |     |        |
| 37  |                    |                     |                                               |            |     |            |             |                                 |       |             | School children                            |                  |                                                        |                      |                                                          |               |                       |                       |     |        |
| 101 | Roarty (121)       | United Kingdom      | Belfast; Cardiff; Glasgow; London; Manchester | non-EU/EEA | No  | National   | Published   | 26 Jun - 15 Aug                 | Other | Convenience | Children of employee s                     | 849              | 7.66% (6.05-9.64)                                      | CLIA; CLIA           | Elecsys Roche; DiaSorin Liaison                          | IgG           | 84%; 64%              | 100%; 98%             | 4   | Medium |
| 38  |                    |                     |                                               |            |     |            |             |                                 |       |             | Children of employee s                     |                  |                                                        |                      |                                                          |               |                       |                       |     |        |
| 39  |                    |                     |                                               |            |     |            |             |                                 |       |             | Children of employee s                     |                  |                                                        |                      |                                                          |               |                       |                       |     |        |
| 102 | Waterfield (122)   | United Kingdom      | Belfast; London;Glasgow; Manchester; Cardiff  | non-EU/EEA | No  | National   | Published   | 16 Apr - 3 Jul                  | Other | Convenience | Children of employee s                     | 992              | 6.9% (5.4 - 8.6)                                       | CLIA; CMIA           | Abbott Laboratories; Roche Diagnostics; DiaSorin Liaison | IgG           | 64-94%                | 98-100%               | 4   | Medium |
| 40  |                    |                     |                                               |            |     |            |             |                                 |       |             | Children of employee s                     |                  |                                                        |                      |                                                          |               |                       |                       |     |        |
| 41  |                    |                     |                                               |            |     |            |             |                                 |       |             | Children of employee s                     |                  |                                                        |                      |                                                          |               |                       |                       |     |        |
| 42  |                    |                     |                                               |            |     |            |             |                                 |       |             | Children of employee s                     |                  |                                                        |                      |                                                          |               |                       |                       |     |        |
| 43  |                    |                     |                                               |            |     |            |             |                                 |       |             | Children of employee s                     |                  |                                                        |                      |                                                          |               |                       |                       |     |        |
| 44  |                    |                     |                                               |            |     |            |             |                                 |       |             | Children of employee s                     |                  |                                                        |                      |                                                          |               |                       |                       |     |        |
| 45  |                    |                     |                                               |            |     |            |             |                                 |       |             | Children of employee s                     |                  |                                                        |                      |                                                          |               |                       |                       |     |        |
| 46  |                    |                     |                                               |            |     |            |             |                                 |       |             | Children of employee s                     |                  |                                                        |                      |                                                          |               |                       |                       |     |        |
| 47  |                    |                     |                                               |            |     |            |             |                                 |       |             | Children of employee s                     |                  |                                                        |                      |                                                          |               |                       |                       |     |        |

|     |                   |                |                  |            |     |            |                        |                                 |          |             |                                             |                                                                   |                                                                                                                                         |                                                |                                                  |           |                                                                                                                                                                                        |        |        |        |
|-----|-------------------|----------------|------------------|------------|-----|------------|------------------------|---------------------------------|----------|-------------|---------------------------------------------|-------------------------------------------------------------------|-----------------------------------------------------------------------------------------------------------------------------------------|------------------------------------------------|--------------------------------------------------|-----------|----------------------------------------------------------------------------------------------------------------------------------------------------------------------------------------|--------|--------|--------|
| 103 | Armann (123)      | Germany        | Eastern Saxony   | EU/EEA     | No  | Regional   | Pre-print              | 25 May - 30 Jun; 15 Sept-13 Oct | Other    | Convenience | Teachers and students                       | 1779                                                              | 0.6%; 0.6%                                                                                                                              | ELISA; CLIA; CMIA                              | EUROIMMUN; Diasorin Liaison; Abbott Laboratories | IgG       | 97.6%                                                                                                                                                                                  | 99.3%  |        |        |
| 104 | Reisinger (124)   | Germany        | Rostock          | EU/EEA     | No  | City/local | Published              | 22-29 Apr                       | Other    | Convenience | Children and mothers                        | 401                                                               | 2.90%                                                                                                                                   | ELISA                                          | EUROIMMUN                                        | IgA; IgG  | NR                                                                                                                                                                                     | NR     | 3      | High   |
| 105 | Tsitsilonis (125) | Greece         | Athens           | EU/EEA     | No  | City/local | Published              | 15 Jun - 15 Jul                 | Other    | Convenience | Employees and students                      | 2500                                                              | 0.93% (0.27, 2.09) §                                                                                                                    | CLIA                                           | Roche Diagnostics                                | Total Abs | 100%                                                                                                                                                                                   | 99.81% | 5      | Medium |
| 106 | Lastrucci (126)   | Italy          | Prato            | EU/EEA     | No  | Regional   | Published              | 1 May - 31 May                  | Multiple | Random      | Work-from-home; Support service             | 1828                                                              | 1% (0.3-2.0); 1.4% (0.7-2.2)                                                                                                            | LFA                                            | Hangzhou Laihe Biotech                           | IgM; IgG  | NR                                                                                                                                                                                     | NR     | 2      | High   |
| 107 | Soriano (127)     | Spain          | Madrid           | EU/EEA     | Yes | City/local | Published              | 27 Apr - 17 May                 | Multiple | Convenience | University staff, family members, community | 674                                                               | 13.8%                                                                                                                                   | LFA                                            | PCL Inc                                          | IgM; IgG  | NR                                                                                                                                                                                     | NR     | 3      | High   |
| 108 | Montenegro (128)  | Spain          | Barcelona        | EU/EEA     | No  | City/local | Published              | 21-24 Apr; 29 Apr - 6 May       | Multiple | Random      | HH/C; PSC                                   | 311; 634                                                          | 5.47% (3.44-8.58); 38.49% (34.78%-42.33%)                                                                                               | LFA; LFA; LFA                                  | Livzon; Lysine; Sure Screen                      | IgM; IgG  | Livzon =91.2%; Lysun =98.6%; SureScreen=91%                                                                                                                                            | NR     | 9      | Low    |
| 109 | Emmenegger (129)  | Switzerland    | Canton of Zurich | non-EU/EEA | Yes | Regional   | Pre-print              | Mar - Jul                       | Multiple | Convenience | BD; PSC;                                    | Total: 33932; Blood donor cohort: 9,102; Patient cohort: 24,830 ; | BDS cohort <sup>§</sup> : April: 1.2%; May: 1.6%; July: 0.7%; Patient cohort <sup>§</sup> : March: 0.3%; April: 1.4%; May - July: 0.9%; | Tripartite Automated Blood Immunoassay (TRABI) | In house                                         | IgG       | 100%                                                                                                                                                                                   | 100%   | 5      | Medium |
| 110 | Dopico (130)      | Sweden         | Stockholm        | EU/EEA     | No  | City/local | Published <sup>^</sup> | 4 Mar - 11 Dec                  | Multiple | Convenience | BD; Pregnant women                          | 2600; 2500                                                        | 14.8% (12.2-18.0)                                                                                                                       | ELISA                                          | In house                                         | IgG       | Spike 3SD:100% (95% CI [97.5-100.0]); Spike 6SD:100% (95% CI [99.6-100.0]); RBD 3SD:100% (95% CI [98.4-99.4]); RBD 6SD:100% (95% CI [99.6-100.0]); RBD 3SD:99.0% (95% CI [94.2-99.3]); | 5      | Medium |        |
| 111 | Davis (131)       | United Kingdom | London           | non-EU/EEA | No  | City/local | Pre-print              | Jun                             | Other    | Convenience | University staff                            | 1882                                                              | 6.6% (5.6-7.8)                                                                                                                          | LFA                                            | SureScreen                                       | IgM; IgG  | 89%                                                                                                                                                                                    | 100%   | 4      | Medium |

For peer review only

1  
2  
3  
4  
5  
6  
7  
8  
9  
10  
11  
12  
13  
14  
15  
16  
17  
18  
19  
20  
21  
22  
23  
24  
25  
26  
27  
28  
29  
30  
31  
32  
33  
34  
35  
36  
37  
38  
39  
40  
41  
42  
43  
44  
45  
46  
47

NR = Not reported; GP = General population; BD= Blood donors; RS = Residual sera; PSC = Patients seeking care (non-COVID-19); Sn: Sensitivity; Sp: Specificity; \* LuLISA: Luciferase Linked Immunosorbent Assay; ^ Initially reported to WHO EURO and ECDC in 2020 or in pre-print form and since published;

For peer review only

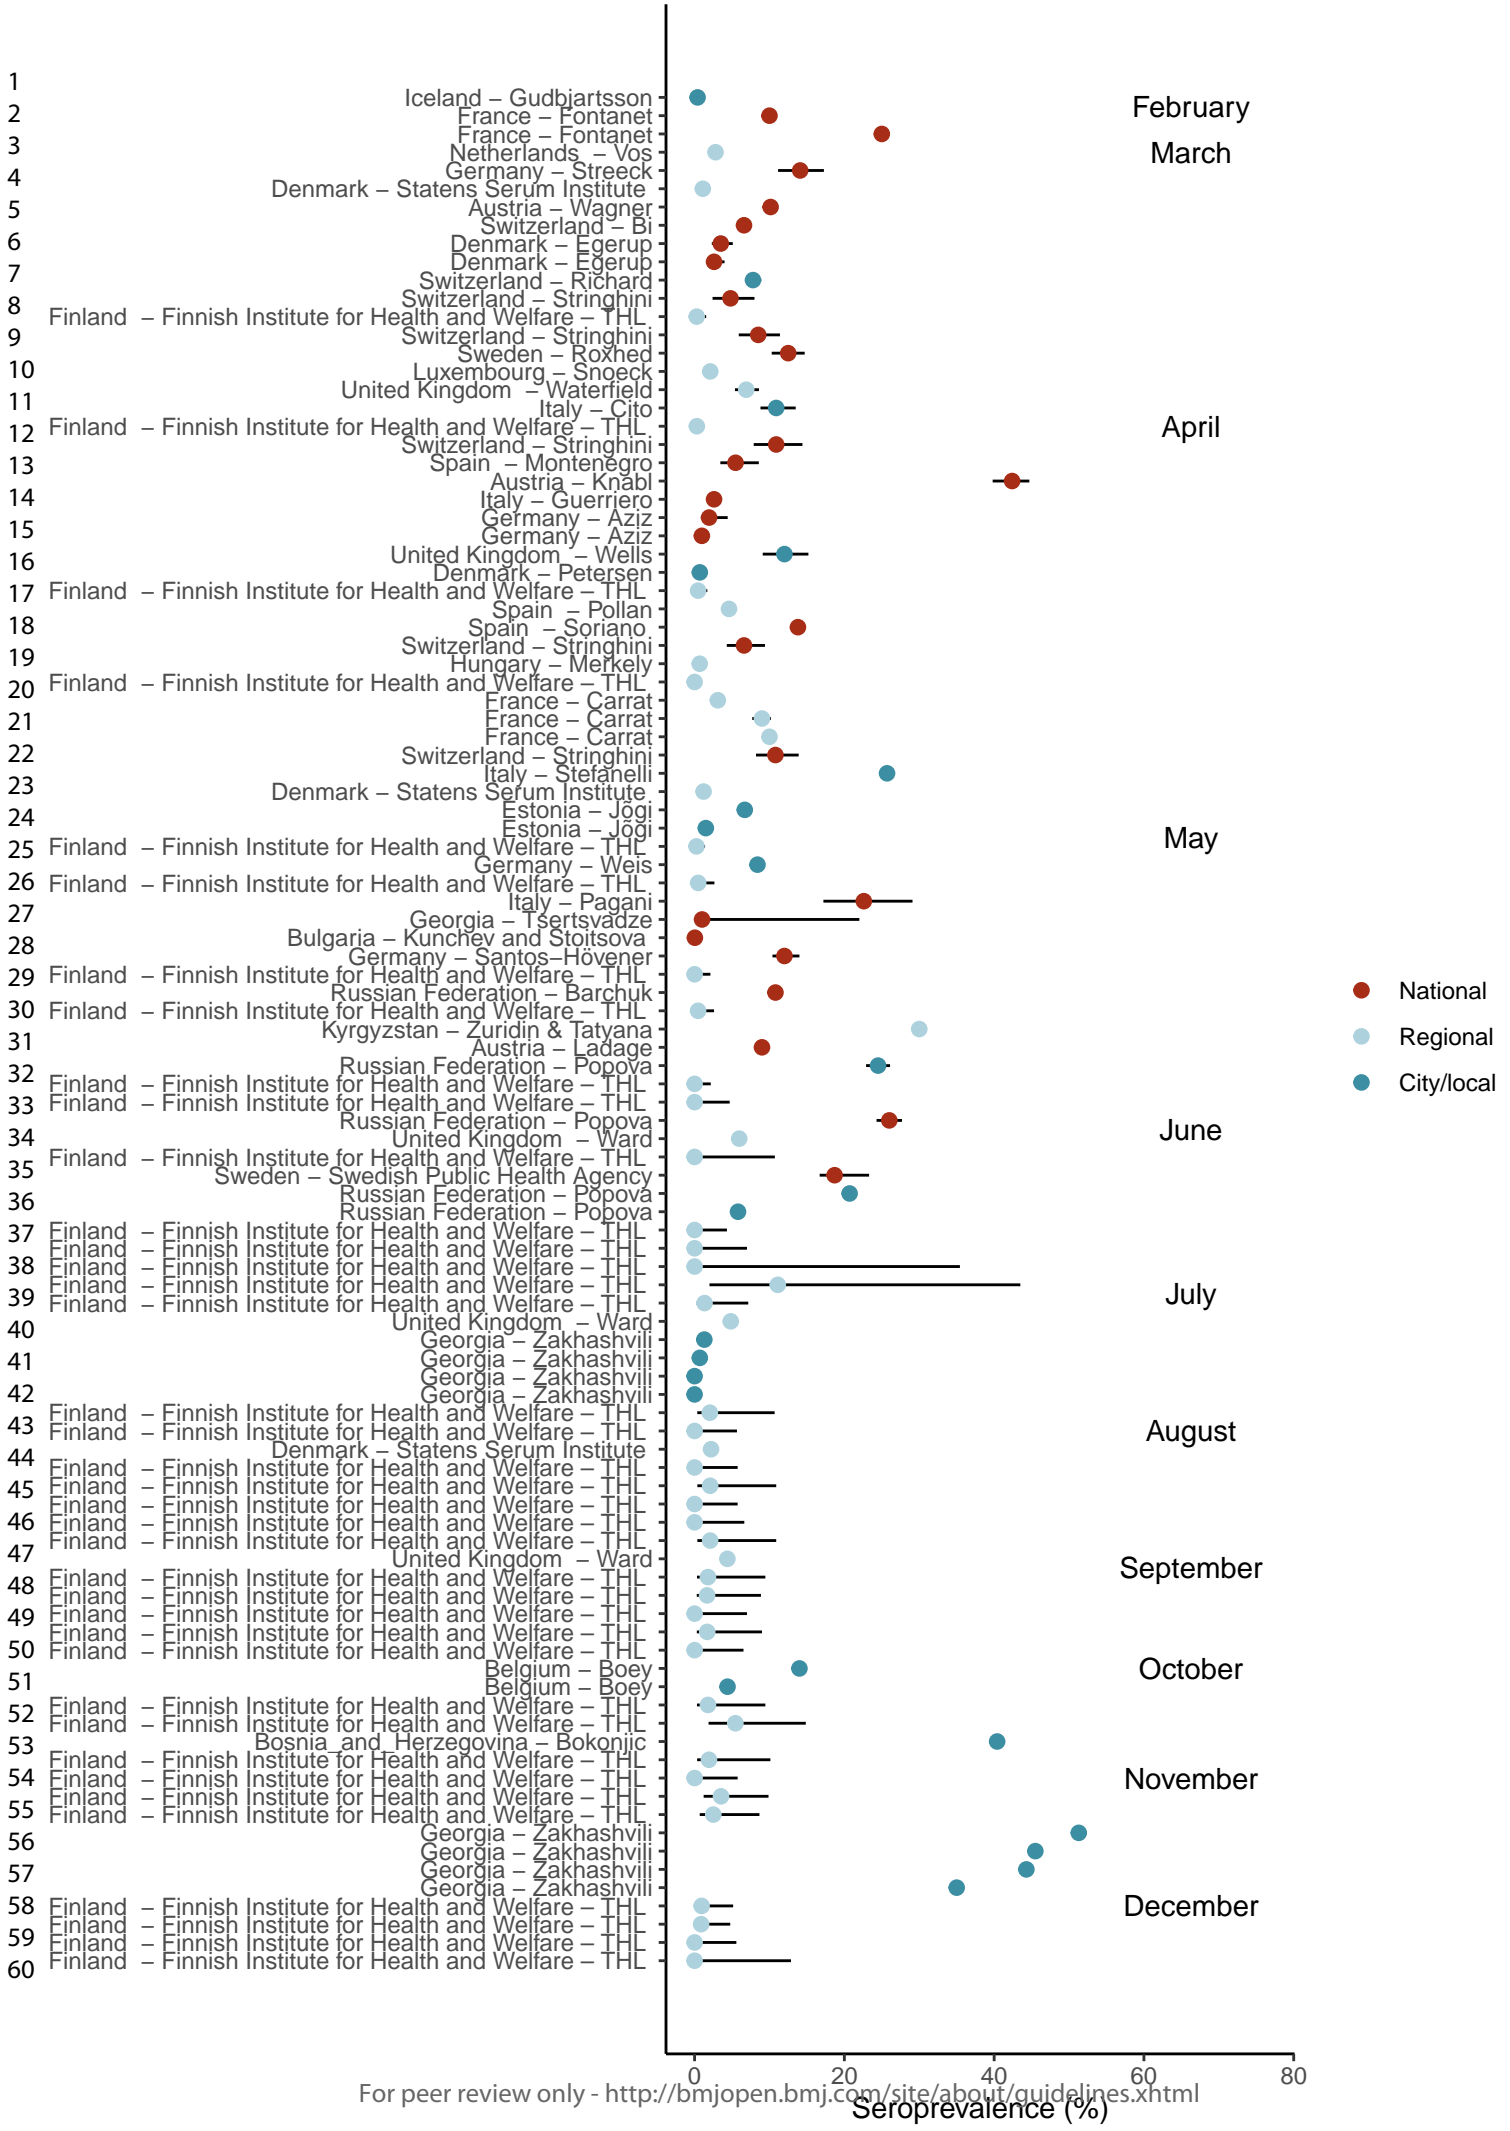



1  
2  
3  
4  
5  
6  
7  
8  
9  
10  
11  
12  
13  
14  
15  
16  
17  
18  
19  
20  
21  
22  
23  
24  
25  
26  
27  
28  
29  
30  
31  
32  
33  
34  
35  
36  
37  
38  
39  
40  
41  
42  
43  
44  
45  
46  
47  
48  
49  
50  
51  
52  
53  
54  
55  
56  
57  
58  
59  
60

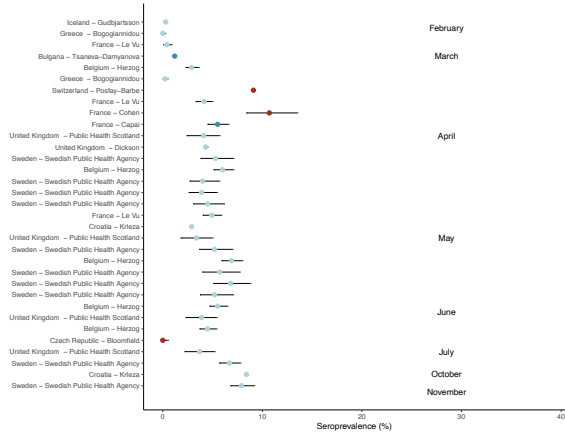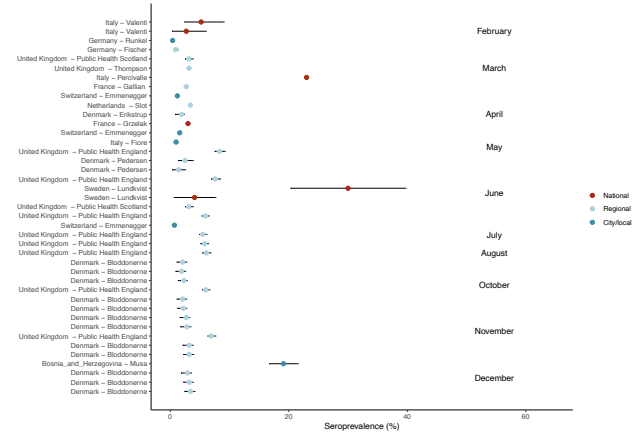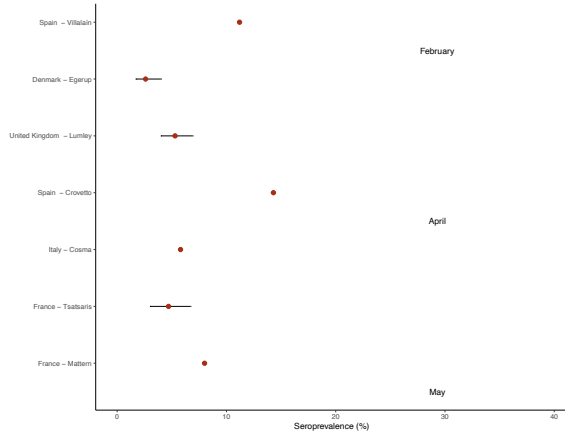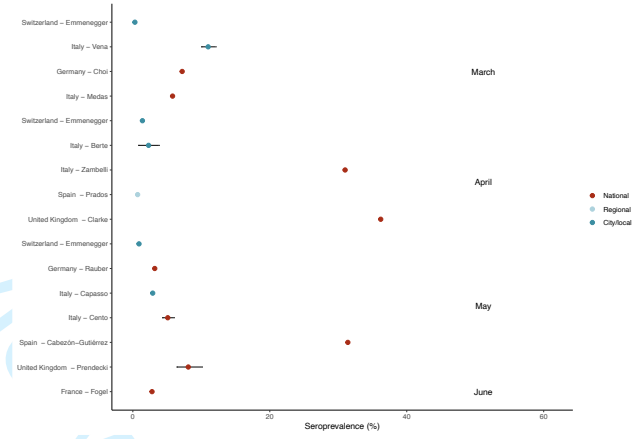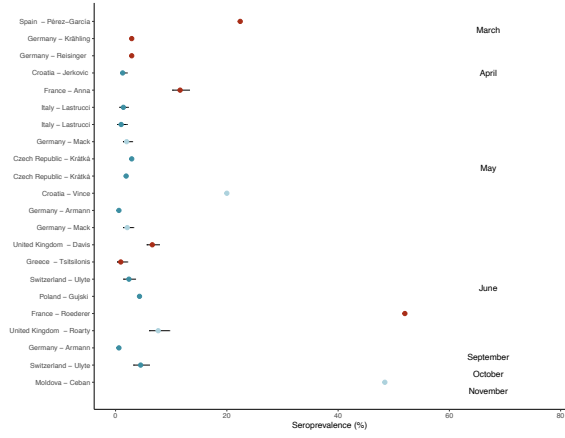

1  
2  
3  
4  
5  
6  
7  
8  
9  
10  
11  
12  
13  
14  
15  
16  
17  
18  
19  
20  
21  
22  
23  
24  
25  
26  
27  
28  
29  
30  
31  
32  
33  
34  
35  
36  
37  
38  
39  
40  
41  
42  
43  
44  
45  
46  
47  
48  
49  
50  
51  
52  
53  
54  
55  
56  
57  
58  
59  
60

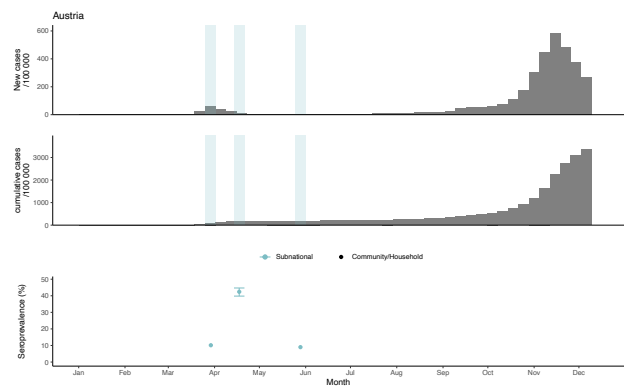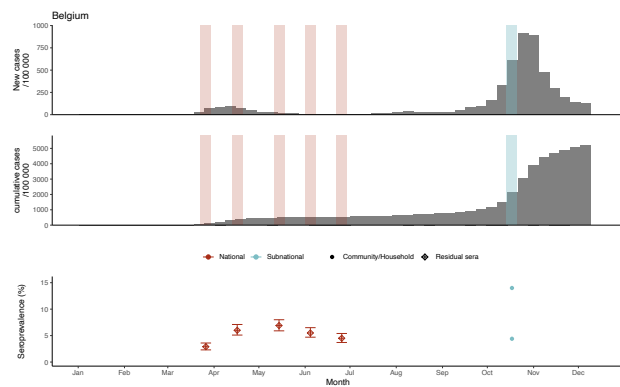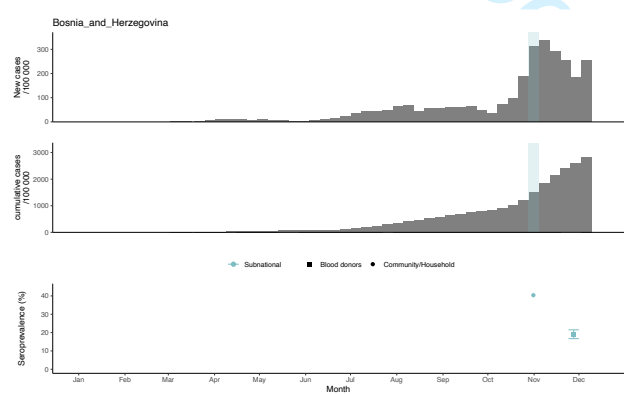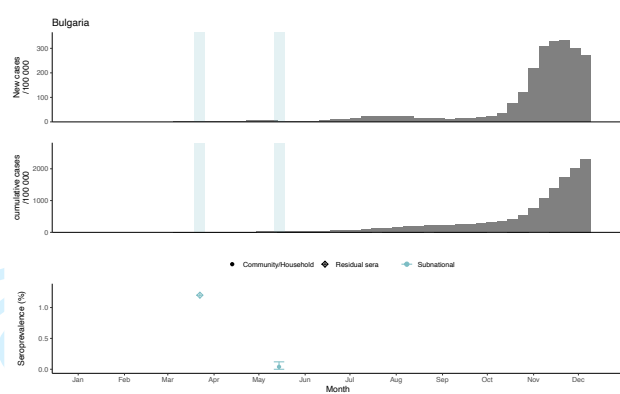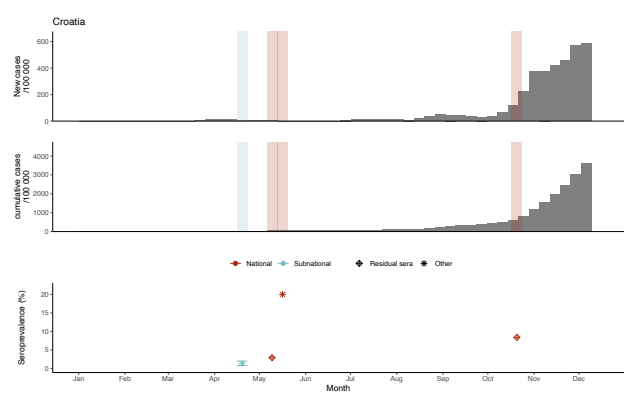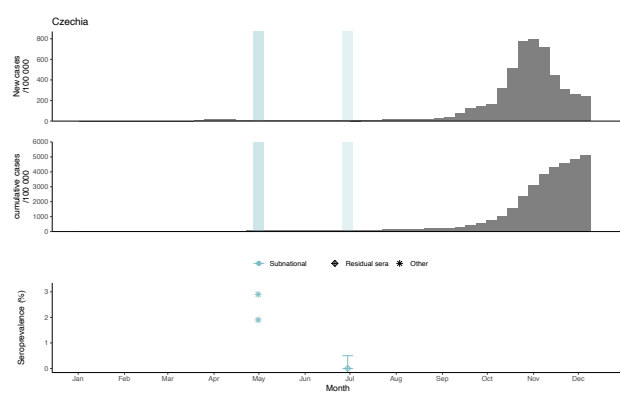

1  
2  
3  
4  
5  
6  
7  
8  
9  
10  
11  
12  
13  
14  
15  
16  
17  
18  
19  
20  
21  
22  
23  
24  
25  
26  
27  
28  
29  
30  
31  
32  
33  
34  
35  
36  
37  
38  
39  
40  
41  
42  
43  
44  
45  
46  
47  
48  
49  
50  
51  
52  
53  
54  
55  
56  
57  
58  
59  
60

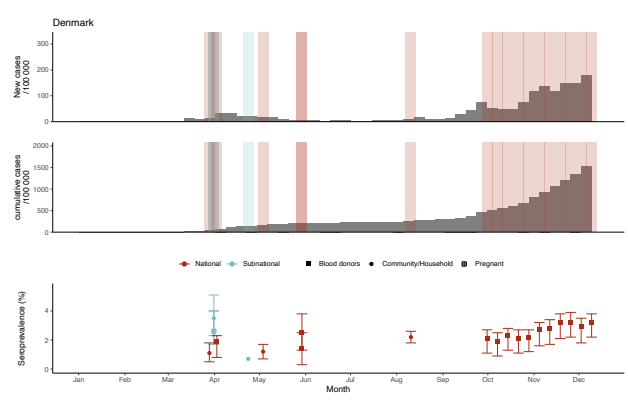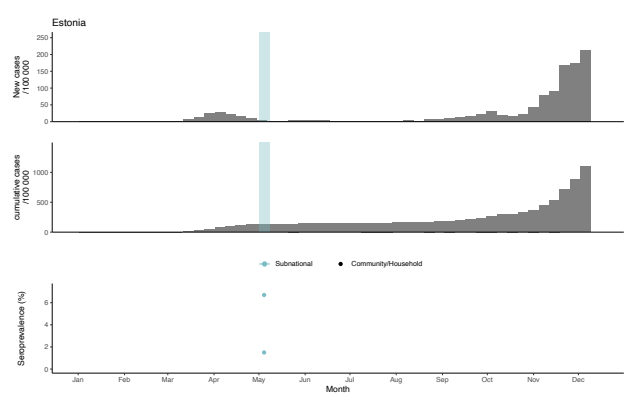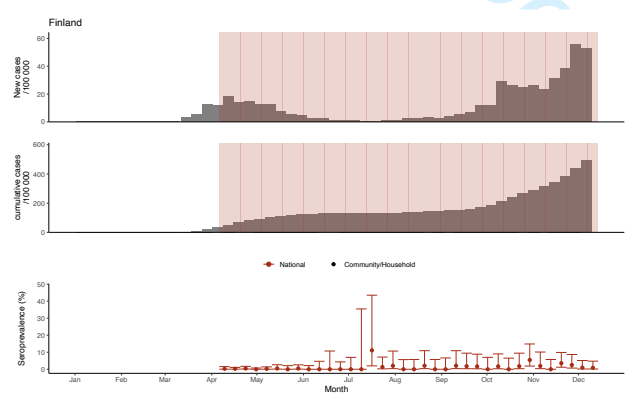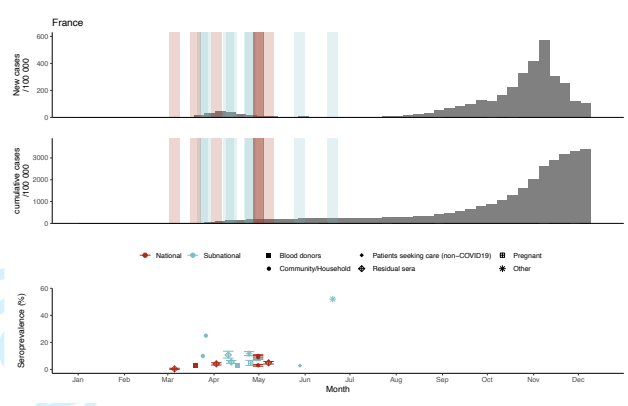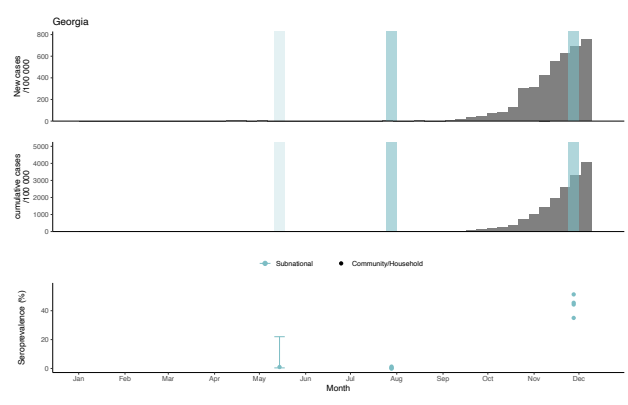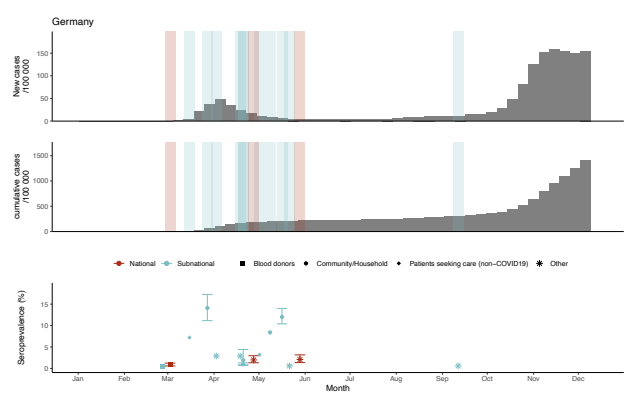

1  
2  
3  
4  
5  
6  
7  
8  
9  
10  
11  
12  
13  
14  
15  
16  
17  
18  
19  
20  
21  
22  
23  
24  
25  
26  
27  
28  
29  
30  
31  
32  
33  
34  
35  
36  
37  
38  
39  
40  
41  
42  
43  
44  
45  
46  
47  
48  
49  
50  
51  
52  
53  
54  
55  
56  
57  
58  
59  
60

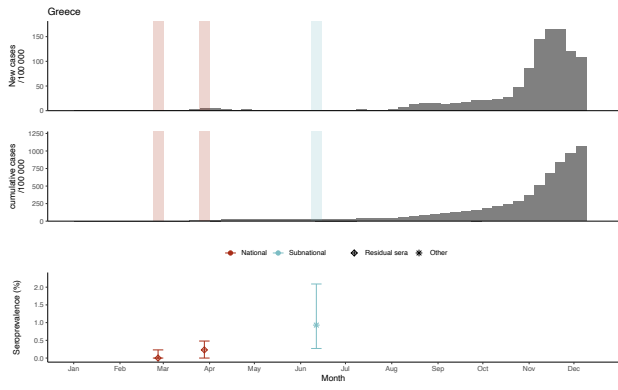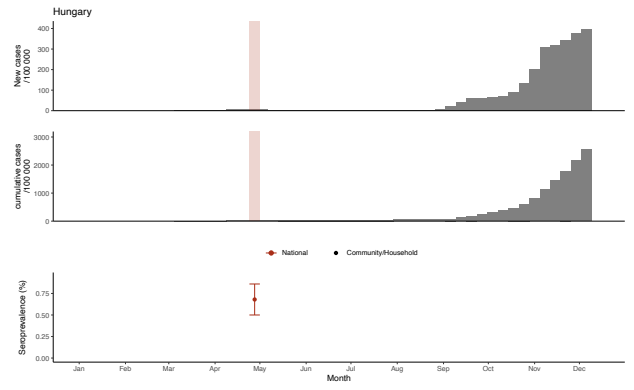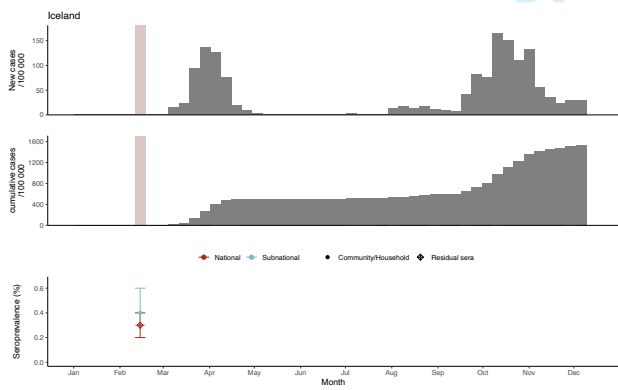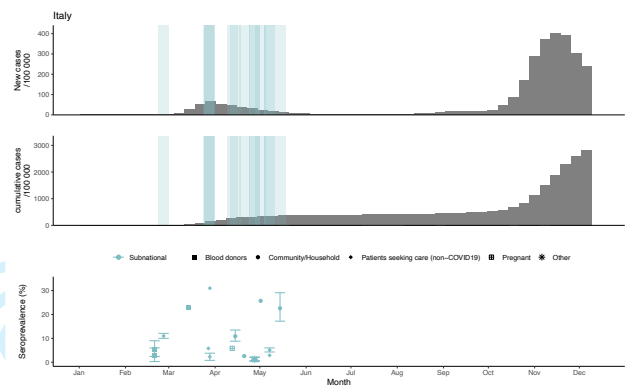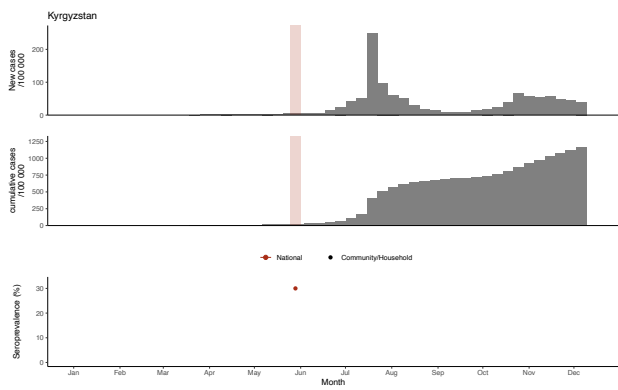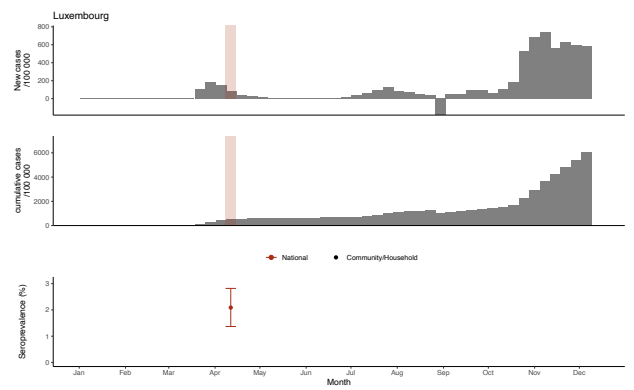

1  
2  
3  
4  
5  
6  
7  
8  
9  
10  
11  
12  
13  
14  
15  
16  
17  
18  
19  
20  
21  
22  
23  
24  
25  
26  
27  
28  
29  
30  
31  
32  
33  
34  
35  
36  
37  
38  
39  
40  
41  
42  
43  
44  
45  
46  
47  
48  
49  
50  
51  
52  
53  
54  
55  
56  
57  
58  
59  
60

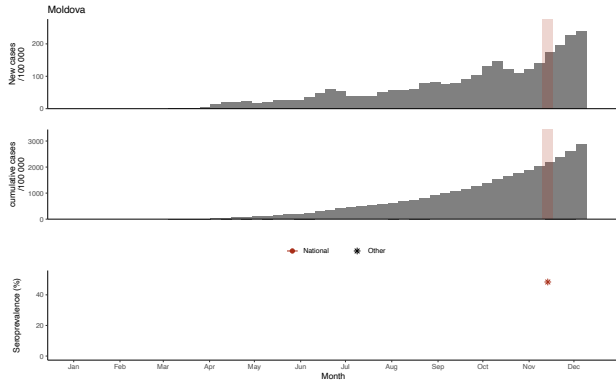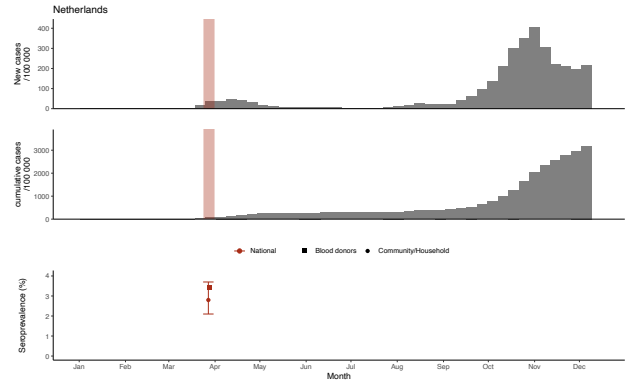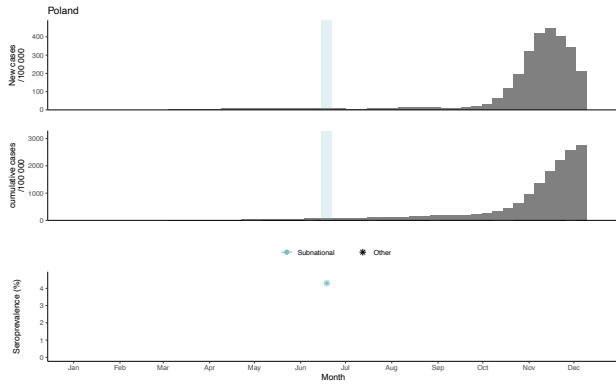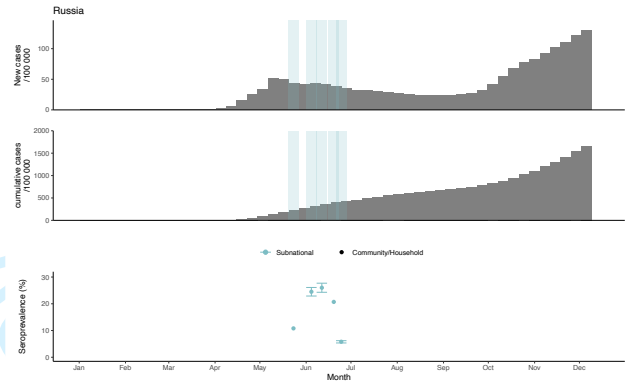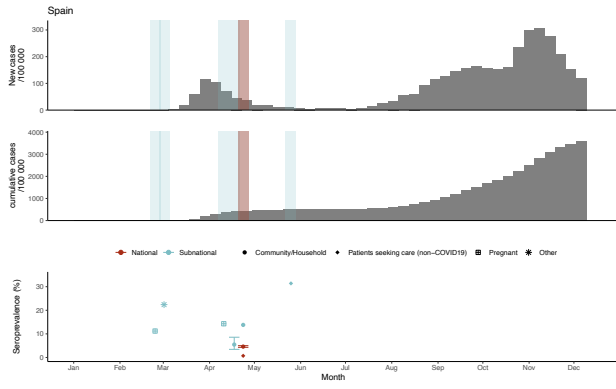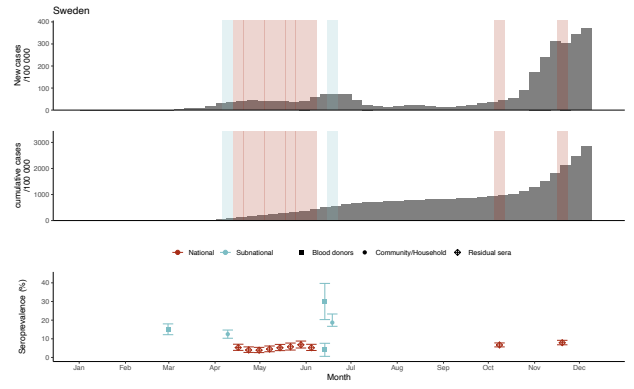

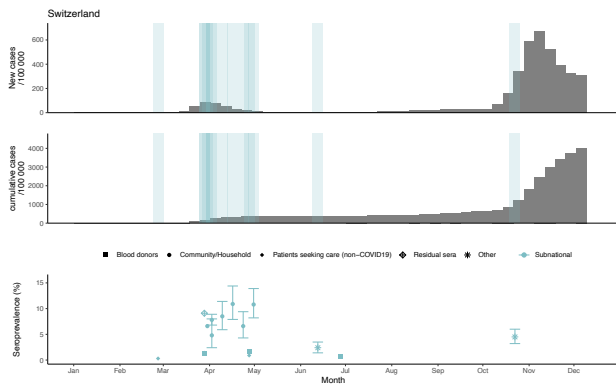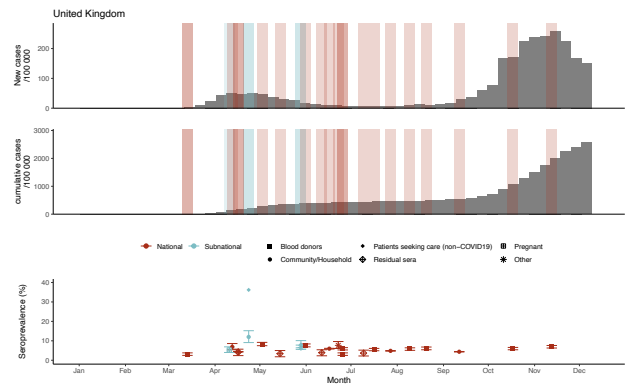

For peer review only

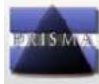

## PRISMA 2020 Checklist

| Section and Topic             | Item # | Checklist item                                                                                                                                                                                                                                                                                       | Location where item is reported     |
|-------------------------------|--------|------------------------------------------------------------------------------------------------------------------------------------------------------------------------------------------------------------------------------------------------------------------------------------------------------|-------------------------------------|
| <b>TITLE</b>                  |        |                                                                                                                                                                                                                                                                                                      |                                     |
| Title                         | 1      | Identify the report as a systematic review.                                                                                                                                                                                                                                                          | Page 1                              |
| <b>ABSTRACT</b>               |        |                                                                                                                                                                                                                                                                                                      |                                     |
| Abstract                      | 2      | See the PRISMA 2020 for Abstracts checklist.                                                                                                                                                                                                                                                         | Page 2                              |
| <b>INTRODUCTION</b>           |        |                                                                                                                                                                                                                                                                                                      |                                     |
| Rationale                     | 3      | Describe the rationale for the review in the context of existing knowledge.                                                                                                                                                                                                                          | Page 6                              |
| Objectives                    | 4      | Provide an explicit statement of the objective(s) or question(s) the review addresses.                                                                                                                                                                                                               | Page 7                              |
| <b>METHODS</b>                |        |                                                                                                                                                                                                                                                                                                      |                                     |
| Eligibility criteria          | 5      | Specify the inclusion and exclusion criteria for the review and how studies were grouped for the syntheses.                                                                                                                                                                                          | Page 7, Supplementary Material 2    |
| Information sources           | 6      | Specify all databases, registers, websites, organisations, reference lists and other sources searched or consulted to identify studies. Specify the date when each source was last searched or consulted.                                                                                            | Page 7                              |
| Search strategy               | 7      | Present the full search strategies for all databases, registers and websites, including any filters and limits used.                                                                                                                                                                                 | Page 7, Supplementary Material 1    |
| Selection process             | 8      | Specify the methods used to decide whether a study met the inclusion criteria of the review, including how many reviewers screened each record and each report retrieved, whether they worked independently, and if applicable, details of automation tools used in the process.                     | Page 8                              |
| Data collection process       | 9      | Specify the methods used to collect data from reports, including how many reviewers collected data from each report, whether they worked independently, any processes for obtaining or confirming data from study investigators, and if applicable, details of automation tools used in the process. | Page 8 and 9                        |
| Data items                    | 10a    | List and define all outcomes for which data were sought. Specify whether all results that were compatible with each outcome domain in each study were sought (e.g. for all measures, time points, analyses), and if not, the methods used to decide which results to collect.                        | Page 8 and 9                        |
|                               | 10b    | List and define all other variables for which data were sought (e.g. participant and intervention characteristics, funding sources). Describe any assumptions made about any missing or unclear information.                                                                                         | Page 8 and 9                        |
| Study risk of bias assessment | 11     | Specify the methods used to assess risk of bias in the included studies, including details of the tool(s) used, how many reviewers assessed each study and whether they worked independently, and if applicable, details of automation tools used in the process.                                    | Page 8 and 9, Supplementary Table 1 |
| Effect measures               | 12     | Specify for each outcome the effect measure(s) (e.g. risk ratio, mean difference) used in the synthesis or presentation of results.                                                                                                                                                                  | Page 8 and 9                        |
| Synthesis methods             | 13a    | Describe the processes used to decide which studies were eligible for each synthesis (e.g. tabulating the study intervention characteristics and comparing against the planned groups for each synthesis (item #5)).                                                                                 | Page 8                              |
|                               | 13b    | Describe any methods required to prepare the data for presentation or synthesis, such as handling of missing summary statistics, or data conversions.                                                                                                                                                | Page 8                              |
|                               | 13c    | Describe any methods used to tabulate or visually display results of individual studies and syntheses.                                                                                                                                                                                               | Page 8 and 9                        |
|                               | 13d    | Describe any methods used to synthesize results and provide a rationale for the choice(s). If meta-analysis was performed, describe the model(s), method(s) to identify the presence and extent of statistical heterogeneity, and software package(s) used.                                          | Page 8 and 9                        |
|                               | 13e    | Describe any methods used to explore possible causes of heterogeneity among study results (e.g. subgroup analysis, meta-regression).                                                                                                                                                                 | Page 8 and 9                        |



## PRISMA 2020 Checklist

| Section and Topic             | Item # | Checklist item                                                                                                                                                                                                                                                                       | Location where item is reported           |
|-------------------------------|--------|--------------------------------------------------------------------------------------------------------------------------------------------------------------------------------------------------------------------------------------------------------------------------------------|-------------------------------------------|
|                               | 13f    | Describe any sensitivity analyses conducted to assess robustness of the synthesized results.                                                                                                                                                                                         | N/A                                       |
| Reporting bias assessment     | 14     | Describe any methods used to assess risk of bias due to missing results in a synthesis (arising from reporting biases).                                                                                                                                                              | N/A                                       |
| Certainty assessment          | 15     | Describe any methods used to assess certainty (or confidence) in the body of evidence for an outcome.                                                                                                                                                                                | Page 8 and 9, Supplementary Table 1       |
| <b>RESULTS</b>                |        |                                                                                                                                                                                                                                                                                      |                                           |
| Study selection               | 16a    | Describe the results of the search and selection process, from the number of records identified in the search to the number of studies included in the review, ideally using a flow diagram.                                                                                         | Page 9, Figure 1                          |
|                               | 16b    | Cite studies that might appear to meet the inclusion criteria, but which were excluded, and explain why they were excluded.                                                                                                                                                          | Figure 9                                  |
| Study characteristics         | 17     | Cite each included study and present its characteristics.                                                                                                                                                                                                                            | Table 1, Supplementary Table 2, Figure 2  |
| Risk of bias in studies       | 18     | Present assessments of risk of bias for each included study.                                                                                                                                                                                                                         | Page 17, Supplementary Table 1            |
| Results of individual studies | 19     | For all outcomes, present, for each study: (a) summary statistics for each group (where appropriate) and (b) an effect estimate and its precision (e.g. confidence/credible interval), ideally using structured tables or plots.                                                     | Table 1, Supplementary Table 2, Figure 3. |
| Results of syntheses          | 20a    | For each synthesis, briefly summarise the characteristics and risk of bias among contributing studies.                                                                                                                                                                               | Page 17, Supplementary Table 1            |
|                               | 20b    | Present results of all statistical syntheses conducted. If meta-analysis was done, present for each the summary estimate and its precision (e.g. confidence/credible interval) and measures of statistical heterogeneity. If comparing groups, describe the direction of the effect. | Page 9-16, Figure 3                       |
|                               | 20c    | Present results of all investigations of possible causes of heterogeneity among study results.                                                                                                                                                                                       | Page 9-16, Figure 3                       |
|                               | 20d    | Present results of all sensitivity analyses conducted to assess the robustness of the synthesized results.                                                                                                                                                                           | N/A                                       |
| Reporting biases              | 21     | Present assessments of risk of bias due to missing results (arising from reporting biases) for each synthesis assessed.                                                                                                                                                              | N/A                                       |
| Certainty of evidence         | 22     | Present assessments of certainty (or confidence) in the body of evidence for each outcome assessed.                                                                                                                                                                                  | Page 9-16, Figure 3                       |
| <b>DISCUSSION</b>             |        |                                                                                                                                                                                                                                                                                      |                                           |
| Discussion                    | 23a    | Provide a general interpretation of the results in the context of other evidence.                                                                                                                                                                                                    | Page 17-20                                |
|                               | 23b    | Discuss any limitations of the evidence included in the review.                                                                                                                                                                                                                      | Page 20-21                                |
|                               | 23c    | Discuss any limitations of the review processes used.                                                                                                                                                                                                                                | Page 20-21                                |
|                               | 23d    | Discuss implications of the results for practice, policy, and future research.                                                                                                                                                                                                       | Page 21                                   |
| <b>OTHER INFORMATION</b>      |        |                                                                                                                                                                                                                                                                                      |                                           |



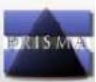

# PRISMA 2020 Checklist

1  
2  
3  
4  
5  
6  
7  
8  
9  
10  
11  
12  
13  
14  
15  
16  
17  
18  
19  
20  
21  
22  
23  
24  
25  
26  
27  
28  
29  
30  
31  
32  
33  
34  
35  
36  
37  
38  
39  
40  
41  
42  
43  
44  
45  
46  
47

| Section and Topic                              | Item # | Checklist item                                                                                                                                                                                                                             | Location where item is reported |
|------------------------------------------------|--------|--------------------------------------------------------------------------------------------------------------------------------------------------------------------------------------------------------------------------------------------|---------------------------------|
| Registration and protocol                      | 24a    | Provide registration information for the review, including register name and registration number, or state that the review was not registered.                                                                                             | Page 7                          |
|                                                | 24b    | Indicate where the review protocol can be accessed, or state that a protocol was not prepared.                                                                                                                                             | Page 7                          |
|                                                | 24c    | Describe and explain any amendments to information provided at registration or in the protocol.                                                                                                                                            | Page 7                          |
| Support                                        | 25     | Describe sources of financial or non-financial support for the review, and the role of the funders or sponsors in the review.                                                                                                              | Page 23                         |
| Competing interests                            | 26     | Declare any competing interests of review authors.                                                                                                                                                                                         | Page 23                         |
| Availability of data, code and other materials | 27     | Report which of the following are publicly available and where they can be found: template data collection forms; data extracted from included studies; data used for all analyses; analytic code; any other materials used in the review. | Supplementary Table 2           |

From: Page MJ, McKenzie JE, Bossuyt PM, Boutron I, Hoffmann TC, Mulrow CD, et al. The PRISMA 2020 statement: an updated guideline for reporting systematic reviews. *BMJ* 2021;372:n71. doi: 10.1136/bmj.n71  
 For more information, visit: <http://www.prisma-statement.org/>
